# Supplementary material for: Genome-wide identification of silencers and their regulatory mechanism in gene transcription in Arabidopsis
Source: Research Square preprint supplement (doi:10.21203/rs.3.rs-5559292/v1), 2025-01-13
Supplement: Supplementary file 1 [file 1bbe02c3c9822c361046be56.xlsx]

## Sheet: tmp
Supplementary Table 7 Chromatin contact loops identified from Hi-C data
CHR1	star1	end1	CHR2	star2	end2	count	expected	enrichment(count/expected)	log(q-value)	PP	SS	EE	PS	PE	SE	PSE	distance
chr1	2500	3000	chr1	10500	11000	20	14.1779	2.93726	6.80907	1	0	0	0	0	0	0	8000
chr1	2500	3000	chr1	14500	15000	32	54.1611	1.76981	18.081	1	0	0	0	0	0	0	12000
chr1	9500	10000	chr1	21500	22000	17	15.9542	1.76498	9.63182	1	0	0	0	0	0	0	12000
chr1	3000	3500	chr1	22000	22500	10	7.8233	0.93008	10.7518	1	0	0	0	0	0	0	19000
chr1	2500	3000	chr1	27500	28000	21	45.7564	0.607723	34.5552	1	0	0	0	0	0	0	25000
chr1	2500	3000	chr1	31500	32000	21	50.2851	0.484902	43.3077	1	0	0	0	0	0	0	29000
chr1	2500	3000	chr1	32000	32500	29	82.3134	0.469827	61.7248	1	0	0	0	0	0	0	29500
chr1	2500	3000	chr1	49500	50000	29	102.171	0.233069	124.427	1	0	0	1	0	0	0	47000
chr1	41500	42000	chr1	88500	89000	9	16.865	0.223875	40.201	1	0	0	0	0	0	0	47000
chr1	59500	60000	chr1	88500	89000	8	8.24065	0.465447	17.1878	1	0	0	1	0	0	0	29000
chr1	60000	60500	chr1	88500	89000	9	10.6491	0.480594	18.7268	1	0	0	1	0	0	0	28500
chr1	50000	50500	chr1	104000	104500	9	18.694	0.180035	49.9903	0	1	0	1	0	0	0	54000
chr1	59500	60000	chr1	104000	104500	14	34.1018	0.257441	54.3814	0	1	0	1	0	0	0	44500
chr1	65000	65500	chr1	104000	104500	7	8.52461	0.289712	24.1619	0	0	0	1	0	0	0	39000
chr1	68500	69000	chr1	104000	104500	8	10.1277	0.352002	22.7271	0	0	0	1	0	0	0	35500
chr1	73000	73500	chr1	104000	104500	8	8.79794	0.428904	18.6522	0	0	0	1	0	0	0	31000
chr1	85000	85500	chr1	111000	111500	8	7.0363	0.554743	14.4211	1	0	0	0	1	0	0	26000
chr1	104000	104500	chr1	117000	117500	17	16.5986	1.6882	10.0699	0	0	0	0	0	1	0	13000
chr1	64000	64500	chr1	129500	130000	11	29.7882	0.130913	84.0253	1	0	0	0	0	0	0	65500
chr1	113000	113500	chr1	129500	130000	13	12.5692	1.14321	11.3715	1	0	0	0	0	0	0	16500
chr1	113500	114000	chr1	129500	130000	19	26.7715	1.21205	15.676	1	0	0	0	0	0	0	16000
chr1	118000	118500	chr1	129500	130000	16	13.1705	1.85766	8.613	1	0	0	0	0	0	0	11500
chr1	80000	80500	chr1	130000	130500	6	7.34054	0.209277	28.6701	1	0	0	0	0	0	0	50000
chr1	88000	88500	chr1	130000	130500	7	8.57859	0.287133	24.3789	1	0	0	0	0	0	0	42000
chr1	132000	132500	chr1	134500	135000	32	8.27936	10.1539	3.1515	1	0	0	1	0	0	0	2500
chr1	132000	132500	chr1	135000	135500	34	13.5024	8.90273	3.81905	1	0	0	1	0	0	0	3000
chr1	99000	99500	chr1	141000	141500	8	11.3996	0.295221	27.0983	1	0	0	0	0	0	0	42000
chr1	129500	130000	chr1	141500	142000	18	17.8759	1.79719	10.0157	1	0	0	0	0	0	0	12000
chr1	15000	15500	chr1	143000	143500	5	10.069	0.056444	88.5834	0	0	0	1	0	0	0	128000
chr1	42500	43000	chr1	143000	143500	5	8.03358	0.089961	55.5796	0	0	0	1	0	0	0	100500
chr1	129500	130000	chr1	153500	154000	22	48.4365	0.63242	34.787	1	0	0	0	0	0	0	24000
chr1	146000	146500	chr1	153500	154000	17	7.30598	3.34866	5.07666	1	0	0	0	0	0	0	7500
chr1	140000	140500	chr1	158500	159000	14	16.4762	1.00446	13.9379	0	0	0	1	0	0	0	18500
chr1	41500	42000	chr1	163000	163500	6	14.2549	0.058562	102.456	1	0	0	0	0	0	0	121500
chr1	88500	89000	chr1	163000	163500	10	27.2295	0.109649	91.2001	1	0	0	0	0	0	0	74500
chr1	2000	2500	chr1	178000	178500	5	11.8996	0.038056	131.385	0	0	0	1	0	0	0	176000
chr1	129500	130000	chr1	178000	178500	13	32.5194	0.213833	60.7951	0	0	0	1	0	0	0	48500
chr1	173500	174000	chr1	186000	186500	13	8.22701	1.71579	7.57669	1	0	0	0	0	0	0	12500
chr1	129500	130000	chr1	198000	198500	10	26.287	0.120968	82.6665	1	0	0	1	0	0	0	68500
chr1	198000	198500	chr1	203500	204000	20	7.54778	4.5421	4.40325	1	0	0	1	0	0	0	5500
chr1	80000	80500	chr1	204000	204500	8	23.0572	0.061363	130.372	1	0	0	0	0	0	0	124000
chr1	90000	90500	chr1	204000	204500	8	22.7689	0.063766	125.459	1	0	0	1	0	0	0	114000
chr1	188500	189000	chr1	204000	204500	12	9.19366	1.27702	9.39686	1	0	0	0	0	0	0	15500
chr1	195500	196000	chr1	204000	204500	17	9.57611	2.79225	6.08828	0	0	0	0	1	0	0	8500
chr1	85000	85500	chr1	207000	207500	6	13.9534	0.061794	97.0968	1	0	0	0	0	0	0	122000
chr1	117000	117500	chr1	207500	208000	9	24.3115	0.092683	97.1052	0	0	0	0	1	0	0	90500
chr1	163000	163500	chr1	207500	208000	39	147.759	0.257678	151.352	1	0	0	0	0	0	0	44500
chr1	173500	174000	chr1	208000	208500	60	230.229	0.383954	156.269	1	0	0	0	0	0	0	34500
chr1	174500	175000	chr1	208000	208500	27	77.52	0.414139	65.1955	1	0	0	0	0	0	0	33500
chr1	183500	184000	chr1	208000	208500	28	69.7448	0.643244	43.5294	1	0	0	0	0	0	0	24500
chr1	205000	205500	chr1	208000	208500	30	9.457	8.53844	3.51352	0	0	0	0	1	0	0	3000
chr1	208000	208500	chr1	212500	213000	39	34.3237	5.63955	6.91544	1	0	0	0	0	0	0	4500
chr1	106500	107000	chr1	213000	213500	5	8.97186	0.072664	68.8099	1	0	0	0	0	0	0	106500
chr1	169000	169500	chr1	213000	213500	7	8.67404	0.282626	24.7677	1	0	0	1	0	0	0	44000
chr1	213500	214000	chr1	217500	218000	25	9.00099	6.30801	3.96322	1	0	0	0	0	0	0	4000
chr1	212500	213000	chr1	218000	218500	20	7.03307	4.70845	4.24768	1	0	0	0	0	0	0	5500
chr1	207500	208000	chr1	219500	220000	13	7.86348	1.77768	7.3129	0	0	0	0	1	0	0	12000
chr1	208000	208500	chr1	220000	220500	38	71.3246	1.79597	21.1585	0	0	0	0	1	0	0	12000
chr1	220500	221000	chr1	224500	225000	39	29.5515	6.54315	5.96043	0	0	0	0	1	0	0	4000
chr1	143000	143500	chr1	228500	229000	6	11.7427	0.091674	65.4493	0	1	0	1	0	0	0	85500
chr1	208000	208500	chr1	228500	229000	25	52.1034	0.849203	29.4394	1	0	0	1	0	0	0	20500
chr1	207500	208000	chr1	235000	235500	17	35.1025	0.509144	33.3894	1	0	0	0	0	0	0	27500
chr1	72500	73000	chr1	243500	244000	4	7.24444	0.040485	98.802	1	0	0	0	0	0	0	171000
chr1	213000	213500	chr1	243500	244000	13	23.3148	0.453365	28.6745	1	0	0	0	0	0	0	30500
chr1	235000	235500	chr1	243500	244000	18	11.9798	2.66822	6.74607	1	0	0	0	0	0	0	8500
chr1	90500	91000	chr1	244000	244500	6	15.6587	0.045312	132.415	1	0	0	0	0	0	0	153500
chr1	145500	146000	chr1	244000	244500	6	12.0101	0.087357	68.6837	1	0	0	0	0	0	0	98500
chr1	207000	207500	chr1	244000	244500	7	7.52885	0.341259	20.5123	1	0	0	0	0	0	0	37000
chr1	213000	213500	chr1	244000	244500	9	11.3811	0.438922	20.5048	1	0	0	0	0	0	0	31000
chr1	224500	225000	chr1	246500	247000	18	31.9205	0.754197	23.8664	1	0	0	0	0	0	0	22000
chr1	106500	107000	chr1	248500	249000	5	10.8836	0.047342	105.614	1	0	0	0	0	0	0	142000
chr1	244000	244500	chr1	260000	260500	14	14.1891	1.21597	11.5135	1	0	0	0	0	0	0	16000
chr1	129500	130000	chr1	265500	266000	13	50.5649	0.050832	255.744	1	0	0	1	0	0	0	136000
chr1	208000	208500	chr1	269000	269500	38	158.965	0.167298	227.14	1	0	0	1	1	0	1	61000
chr1	88500	89000	chr1	269500	270000	4	7.50769	0.037651	106.239	1	0	0	1	1	0	1	181000
chr1	203500	204000	chr1	271000	271500	6	10.0571	0.124338	48.2556	1	0	0	0	0	0	0	67500
chr1	104000	104500	chr1	276000	276500	7	21.4394	0.03906	179.211	0	0	0	1	0	0	0	172000
chr1	106500	107000	chr1	281000	281500	4	7.55476	0.037167	107.622	1	0	0	0	0	0	0	174500
chr1	204000	204500	chr1	281000	281500	8	19.1799	0.102729	77.8748	1	0	0	0	0	0	0	77000
chr1	85000	85500	chr1	287500	288000	4	8.01463	0.032721	122.246	0	0	0	1	0	0	0	202500
chr1	118000	118500	chr1	291500	292000	4	7.39199	0.038871	102.904	1	0	0	0	0	0	0	173500
chr1	76000	76500	chr1	292000	292500	10	39.1452	0.031741	315.05	1	0	0	0	1	0	0	216000
chr1	153000	153500	chr1	292000	292500	13	51.0217	0.049028	265.155	1	0	0	0	0	0	0	139000
chr1	269000	269500	chr1	292000	292500	11	13.1995	0.668985	16.4428	1	0	0	1	1	0	1	23000
chr1	88500	89000	chr1	298000	298500	4	8.0868	0.032065	124.747	0	0	0	1	0	0	0	209500
chr1	140000	140500	chr1	298500	299000	5	11.4217	0.04219	118.511	1	0	0	1	1	0	1	158500
chr1	104000	104500	chr1	302000	302500	6	17.3706	0.033383	179.732	0	0	0	1	0	0	0	198000
chr1	131000	131500	chr1	303000	303500	7	21.4854	0.03879	180.459	1	0	0	1	0	0	0	172000
chr1	136000	136500	chr1	303000	303500	9	31.1818	0.041727	215.688	1	0	0	1	0	0	0	167000
chr1	145500	146000	chr1	303000	303500	6	15.8787	0.043495	137.947	1	0	0	1	0	0	0	157500
chr1	184500	185000	chr1	303000	303500	6	13.8597	0.062834	95.4897	1	0	0	1	0	0	0	118500
chr1	187000	187500	chr1	303000	303500	5	9.57534	0.062871	79.5279	0	0	0	0	1	1	0	116000
chr1	233500	234000	chr1	303000	303500	6	10.1446	0.122377	49.0288	1	0	0	1	0	0	0	69500
chr1	275500	276000	chr1	303000	303500	11	15.4573	0.530799	20.7235	1	0	0	1	0	0	0	27500
chr1	251000	251500	chr1	303500	304000	6	8.06437	0.182589	32.8607	1	0	0	1	0	0	0	52500
chr1	292000	292500	chr1	307000	307500	15	15.7074	1.2945	11.5874	1	0	0	0	0	0	0	15000
chr1	203500	204000	chr1	307500	308000	5	8.67448	0.077838	64.236	1	0	0	0	0	0	0	104000
chr1	2000	2500	chr1	308500	309000	5	14.4025	0.022344	223.774	1	0	0	0	0	0	0	306500
chr1	137000	137500	chr1	309500	310000	4	7.26165	0.040293	99.2728	1	0	0	0	0	0	0	172500
chr1	224500	225000	chr1	317000	317500	5	8.16218	0.087375	57.2246	1	0	0	0	0	0	0	92500
chr1	130000	130500	chr1	317500	318000	4	7.77852	0.034942	114.475	1	0	0	0	0	0	0	187500
chr1	203500	204000	chr1	322000	322500	10	32.3346	0.064244	155.657	1	0	0	0	0	0	0	118500
chr1	207500	208000	chr1	322000	322500	10	32.2687	0.064683	154.6	1	0	0	0	0	0	0	114500
chr1	71000	71500	chr1	342500	343000	5	13.7765	0.025531	195.84	1	0	0	1	0	0	0	271500
chr1	89500	90000	chr1	342500	343000	5	13.5414	0.026844	186.261	1	1	0	1	0	0	0	253000
chr1	93000	93500	chr1	342500	343000	4	8.69213	0.027066	147.787	1	0	0	1	0	0	0	249500
chr1	259000	259500	chr1	342500	343000	6	11.5425	0.095065	63.1147	1	0	0	1	0	0	0	83500
chr1	298500	299000	chr1	342500	343000	9	15.4896	0.265013	33.9606	1	1	0	1	1	1	1	44000
chr1	314000	314500	chr1	342500	343000	11	16.3349	0.484555	22.7012	1	0	0	1	0	0	0	28500
chr1	339000	339500	chr1	342500	343000	33	16.4286	7.44244	4.43403	1	0	0	1	0	0	0	3500
chr1	152000	152500	chr1	344500	345000	4	7.87655	0.034	117.647	1	0	0	0	0	0	0	192500
chr1	156500	157000	chr1	344500	345000	4	7.74483	0.03527	113.411	1	0	0	0	0	0	0	188000
chr1	342500	343000	chr1	352500	353000	14	7.1965	2.23913	6.25243	0	1	0	1	0	0	0	10000
chr1	203500	204000	chr1	353500	354000	5	11.038	0.045814	109.137	0	0	0	0	1	0	0	150000
chr1	2500	3000	chr1	361000	361500	21	116.684	0.019213	1093.01	1	0	0	0	0	0	0	358500
chr1	303000	303500	chr1	366000	366500	8	15.9129	0.158841	50.3648	0	0	0	0	1	1	0	63000
chr1	130000	130500	chr1	371000	371500	4	8.58222	0.027916	143.287	0	0	0	1	0	0	0	241000
chr1	2000	2500	chr1	391000	391500	5	15.3938	0.018021	277.454	1	0	0	0	0	0	0	389000
chr1	130000	130500	chr1	400500	401000	4	8.91989	0.025359	157.735	1	0	0	0	0	0	0	270500
chr1	292000	292500	chr1	401500	402000	8	22.5432	0.065737	121.697	1	0	0	0	0	0	0	109500
chr1	207500	208000	chr1	402000	402500	5	12.4729	0.033683	148.443	1	0	0	0	0	0	0	194500
chr1	303000	303500	chr1	402500	403000	6	11.9618	0.088123	68.0867	1	0	0	1	0	0	0	99500
chr1	262500	263000	chr1	407000	407500	8	25.1367	0.046738	171.167	1	0	0	0	0	0	0	144500
chr1	293500	294000	chr1	407000	407500	5	9.5011	0.063925	78.2167	1	0	0	0	0	0	0	113500
chr1	243000	243500	chr1	413500	414000	4	7.26612	0.040244	99.3937	1	0	0	1	0	0	0	170500
chr1	74500	75000	chr1	414000	414500	26	150.515	0.020344	1278.02	1	0	0	0	0	0	0	339500
chr1	372000	372500	chr1	414000	414500	24	73.9299	0.285878	83.9519	1	0	0	0	0	0	0	42000
chr1	291500	292000	chr1	414500	415000	25	117.585	0.057856	432.107	1	0	0	0	0	0	0	123000
chr1	312500	313000	chr1	414500	415000	6	12.1273	0.085548	70.1361	1	0	0	0	0	0	0	102000
chr1	414000	414500	chr1	416000	416500	68	58.0655	11.1441	6.10189	1	0	0	0	0	0	0	2000
chr1	371000	371500	chr1	416500	417000	13	30.2775	0.256144	50.7527	0	0	0	1	0	0	0	45500
chr1	371500	372000	chr1	416500	417000	14	33.7203	0.264891	52.8519	1	0	0	1	0	0	0	45000
chr1	414000	414500	chr1	416500	417000	403	230.259	9.74469	41.3559	1	0	0	0	0	0	0	2500
chr1	118500	119000	chr1	417000	417500	36	217.78	0.023774	1514.26	1	0	0	0	0	0	0	298500
chr1	345500	346000	chr1	417000	417500	27	109.81	0.122149	221.042	1	0	0	0	0	0	0	71500
chr1	402500	403000	chr1	417000	417500	24	37.6802	1.39505	17.2037	1	0	0	0	0	0	0	14500
chr1	414500	415000	chr1	417500	418000	46	33.4841	8.28188	5.55429	1	0	0	0	0	0	0	3000
chr1	143500	144000	chr1	428000	428500	5	14.1729	0.023463	213.101	0	1	0	1	0	0	0	284500
chr1	414500	415000	chr1	428000	428500	15	14.0135	1.48027	10.1333	1	0	0	1	0	0	0	13500
chr1	416500	417000	chr1	431500	432000	24	39.5621	1.28142	18.7292	1	0	0	1	0	0	0	15000
chr1	417000	417500	chr1	431500	432000	38	81.7871	1.34251	28.3053	1	0	0	1	0	0	0	14500
chr1	226000	226500	chr1	437000	437500	6	17.8635	0.030585	196.175	0	0	0	1	0	0	0	211000
chr1	233000	233500	chr1	437000	437500	4	8.07418	0.032179	124.305	1	0	0	0	0	0	0	204000
chr1	238000	238500	chr1	437000	437500	7	22.4552	0.033421	209.449	1	0	0	0	0	0	0	199000
chr1	303500	304000	chr1	437000	437500	10	34.5089	0.051316	194.871	1	0	0	1	0	0	0	133500
chr1	395000	395500	chr1	437000	437500	7	8.93196	0.270616	25.8669	1	0	0	0	0	0	0	42000
chr1	423000	423500	chr1	437000	437500	14	11.9242	1.46725	9.54167	1	0	0	0	0	0	0	14000
chr1	414500	415000	chr1	437500	438000	15	24.4283	0.675627	22.2016	1	0	0	0	0	0	0	23000
chr1	416500	417000	chr1	438000	438500	9	6.92904	0.784183	11.4769	1	0	0	0	0	0	0	21500
chr1	414500	415000	chr1	440000	440500	10	11.5185	0.600181	16.6616	1	0	0	0	0	0	0	25500
chr1	106000	106500	chr1	440500	441000	5	14.6317	0.021275	235.018	1	0	0	0	0	0	0	334500
chr1	414500	415000	chr1	443000	443500	10	13.2724	0.493579	20.2602	1	0	0	0	0	0	0	28500
chr1	2000	2500	chr1	447000	447500	32	203.037	0.015219	2102.63	1	0	0	0	0	0	0	445000
chr1	252000	252500	chr1	447000	447500	7	22.5707	0.032826	213.246	1	0	0	0	0	0	0	195000
chr1	313000	313500	chr1	447000	447500	5	10.3561	0.053062	94.2294	1	0	0	0	0	0	0	134000
chr1	407000	407500	chr1	447000	447500	27	88.0558	0.277531	97.2864	1	0	0	0	0	0	0	40000
chr1	408000	408500	chr1	447000	447500	8	11.2735	0.30042	26.6294	1	0	0	0	0	0	0	39000
chr1	417000	417500	chr1	451000	451500	24	65.9903	0.401937	59.7109	1	0	0	0	0	0	0	34000
chr1	417000	417500	chr1	452500	453000	21	55.8869	0.367335	57.1685	1	0	0	0	0	0	0	35500
chr1	414500	415000	chr1	457500	458000	7	8.73764	0.279648	25.0315	1	0	0	1	0	0	0	43000
chr1	130000	130500	chr1	461500	462000	4	9.53672	0.021091	189.654	1	0	0	0	0	0	0	331500
chr1	207500	208000	chr1	462000	462500	10	40.6458	0.027205	367.579	1	0	0	0	0	0	0	254500
chr1	85000	85500	chr1	464500	465000	4	10.0812	0.01819	219.901	1	0	0	0	0	0	0	379500
chr1	413500	414000	chr1	468000	468500	7	11.9171	0.167444	41.805	1	0	0	0	0	0	0	54500
chr1	414500	415000	chr1	472000	472500	7	11.6039	0.175845	39.8078	0	0	0	1	0	0	0	57500
chr1	413500	414000	chr1	473500	474000	6	8.56823	0.165915	36.1631	1	0	0	0	0	0	0	60000
chr1	417500	418000	chr1	473500	474000	7	11.9313	0.167076	41.8971	1	0	0	0	0	0	0	56000
chr1	407000	407500	chr1	474000	474500	8	17.7233	0.124523	64.2452	1	0	0	0	0	0	0	67000
chr1	129500	130000	chr1	478500	479000	15	75.4703	0.019891	754.11	0	0	0	1	0	0	0	349000
chr1	414000	414500	chr1	478500	479000	24	89.9025	0.14477	165.78	0	0	0	1	0	0	0	64500
chr1	98500	99000	chr1	479000	479500	4	10.2197	0.017528	228.206	1	0	0	1	0	0	0	380500
chr1	309500	310000	chr1	486000	486500	4	7.46762	0.03807	105.07	1	0	0	0	0	0	0	176500
chr1	141000	141500	chr1	490500	491000	6	20.3791	0.019727	304.152	0	0	0	1	0	0	0	349500
chr1	417500	418000	chr1	491500	492000	8	18.5274	0.111951	71.4598	1	0	0	0	0	0	0	74000
chr1	224500	225000	chr1	496000	496500	4	8.93831	0.025223	158.585	1	0	0	0	0	0	0	271500
chr1	303000	303500	chr1	496000	496500	4	7.88698	0.033902	117.987	1	0	0	1	0	0	0	193000
chr1	414500	415000	chr1	498500	499000	5	8.02046	0.090226	55.4164	1	0	0	0	0	0	0	84000
chr1	423000	423500	chr1	499500	500000	11	31.8124	0.10807	101.786	1	0	0	0	0	0	0	76500
chr1	470500	471000	chr1	499500	500000	12	19.1352	0.496171	24.1852	0	0	0	1	0	0	0	29000
chr1	431000	431500	chr1	500000	500500	8	17.6463	0.125823	63.5814	1	0	0	1	0	0	0	69000
chr1	457000	457500	chr1	500000	500500	7	8.69134	0.281816	24.8389	1	0	0	0	0	0	0	43000
chr1	459500	460000	chr1	500000	500500	20	57.5764	0.274073	72.9733	0	0	0	1	0	0	0	40500
chr1	460500	461000	chr1	500000	500500	15	36.6	0.284619	52.702	1	0	0	0	0	0	0	39500
chr1	491500	492000	chr1	500000	500500	32	42.2584	2.66042	12.0282	1	0	0	0	0	0	0	8500
chr1	228000	228500	chr1	507500	508000	10	41.9321	0.023842	419.428	1	0	0	1	0	0	0	279500
chr1	238500	239000	chr1	507500	508000	8	29.6409	0.025974	308	1	0	0	0	0	0	0	269000
chr1	259000	259500	chr1	507500	508000	7	23.6704	0.027808	251.726	1	0	0	0	0	0	0	248500
chr1	311000	311500	chr1	507500	508000	4	7.93262	0.033476	119.489	1	0	0	0	0	0	0	196500
chr1	461000	461500	chr1	507500	508000	8	12.8675	0.241508	33.1252	1	0	0	0	0	0	0	46500
chr1	491500	492000	chr1	507500	508000	24	41.7012	1.16421	20.6149	1	0	0	0	0	0	0	16000
chr1	407000	407500	chr1	516500	517000	5	9.35051	0.066187	75.5435	1	0	0	0	0	0	0	109500
chr1	413500	414000	chr1	522500	523000	5	9.23427	0.068106	73.415	1	0	0	0	0	0	0	109000
chr1	244000	244500	chr1	535000	535500	4	9.15316	0.023633	169.255	1	0	0	0	0	0	0	291000
chr1	407000	407500	chr1	540000	540500	5	10.3915	0.052659	94.9505	1	0	0	0	0	0	0	133000
chr1	437000	437500	chr1	540500	541000	6	12.4387	0.080935	74.1336	1	0	0	0	0	0	0	103500
chr1	407000	407500	chr1	551500	552000	6	15.1792	0.049587	120.999	1	0	0	0	0	0	0	144500
chr1	409000	409500	chr1	553500	554000	5	10.813	0.048057	104.043	1	0	0	0	0	0	0	144500
chr1	428000	428500	chr1	553500	554000	6	14.4762	0.056293	106.585	1	0	0	1	0	0	0	125500
chr1	468500	469000	chr1	553500	554000	8	19.7547	0.095249	83.9904	1	0	0	0	0	0	0	85000
chr1	478500	479000	chr1	553500	554000	5	7.0186	0.112829	44.3148	0	0	0	1	0	0	0	75000
chr1	346500	347000	chr1	554000	554500	23	118.916	0.032219	713.864	1	0	0	0	1	0	0	207500
chr1	68500	69000	chr1	554500	555000	4	11.0042	0.014206	281.571	0	0	0	1	0	0	0	486000
chr1	87000	87500	chr1	554500	555000	4	10.7613	0.015149	264.044	0	0	0	1	0	0	0	467500
chr1	440500	441000	chr1	557500	558000	5	9.43379	0.064913	77.0262	1	0	0	0	0	0	0	117000
chr1	143000	143500	chr1	575000	575500	6	21.6844	0.015706	382.02	0	0	0	1	0	0	0	432000
chr1	413500	414000	chr1	584000	584500	4	7.30042	0.039866	100.336	1	0	0	0	0	0	0	170500
chr1	407000	407500	chr1	588000	588500	4	7.53235	0.037397	106.96	1	0	0	0	0	0	0	181000
chr1	207500	208000	chr1	598000	598500	4	10.1941	0.017648	226.655	0	0	0	0	1	0	0	390500
chr1	415500	416000	chr1	600000	600500	21	103.488	0.036301	578.496	1	0	0	0	0	0	0	184500
chr1	459000	459500	chr1	600500	601000	34	178.24	0.04996	680.544	0	0	0	1	0	0	0	141500
chr1	71500	72000	chr1	601000	601500	6	22.5615	0.013414	447.294	1	0	0	0	0	0	0	529500
chr1	273500	274000	chr1	601000	601500	4	9.55684	0.020974	190.712	1	0	0	0	0	0	0	327500
chr1	432000	432500	chr1	601000	601500	7	20.8596	0.04261	164.281	1	0	0	0	0	0	0	169000
chr1	454500	455000	chr1	601000	601500	5	10.8221	0.047964	104.245	1	0	0	0	0	0	0	146500
chr1	407000	407500	chr1	601500	602000	5	12.3963	0.034235	146.049	1	0	0	0	0	0	0	194500
chr1	244000	244500	chr1	603000	603500	6	20.5041	0.0193	310.881	1	0	0	1	0	0	0	359000
chr1	499500	500000	chr1	613000	613500	8	22.8376	0.063184	126.614	1	0	0	0	0	0	0	113500
chr1	356000	356500	chr1	617000	617500	4	8.61246	0.02768	144.509	1	0	0	0	1	0	0	261000
chr1	417500	418000	chr1	617000	617500	5	12.3816	0.034343	145.59	1	0	0	0	0	0	0	199500
chr1	143000	143500	chr1	633500	634000	4	10.8675	0.014729	271.573	0	1	0	1	0	0	0	490500
chr1	342500	343000	chr1	633500	634000	6	19.2835	0.023875	251.309	1	1	0	1	0	0	0	291000
chr1	440500	441000	chr1	633500	634000	4	7.81238	0.034614	115.56	1	0	0	1	0	0	0	193000
chr1	100000	100500	chr1	634000	634500	4	11.1445	0.013686	292.269	0	0	0	1	0	0	0	534000
chr1	281000	281500	chr1	634000	634500	5	15.1762	0.018913	264.368	1	0	0	0	0	0	0	353000
chr1	358500	359000	chr1	634000	634500	5	13.7822	0.0255	196.078	1	0	0	0	1	0	0	275500
chr1	410500	411000	chr1	634000	634500	4	8.37225	0.029603	135.121	1	0	0	0	0	0	0	223500
chr1	410000	410500	chr1	639000	639500	4	8.32551	0.029992	133.369	1	0	0	0	0	0	0	229000
chr1	499000	499500	chr1	639000	639500	5	10.5294	0.051116	97.8167	1	0	0	0	0	0	0	140000
chr1	184000	184500	chr1	640000	640500	36	230.19	0.015571	2311.99	1	0	0	0	0	0	0	456000
chr1	281000	281500	chr1	640000	640500	62	230.259	0.018834	3291.92	1	0	0	0	0	0	0	359000
chr1	76000	76500	chr1	664500	665000	4	11.2784	0.013205	302.916	1	0	0	0	1	0	0	588500
chr1	244000	244500	chr1	666500	667000	7	27.0872	0.016758	417.711	1	0	0	0	0	0	0	422500
chr1	291500	292000	chr1	670000	670500	4	10.0424	0.018381	217.616	1	0	0	0	0	0	0	378500
chr1	277500	278000	chr1	670500	671000	4	10.0708	0.018241	219.286	1	0	0	0	0	0	0	393000
chr1	88500	89000	chr1	671000	671500	4	11.3088	0.013099	305.367	1	0	0	0	0	0	0	582500
chr1	309500	310000	chr1	671000	671500	4	9.83164	0.019454	205.613	1	0	0	0	0	0	0	361500
chr1	416500	417000	chr1	675500	676000	12	52.6913	0.026659	450.129	1	0	0	0	0	0	0	259000
chr1	413500	414000	chr1	687500	688000	6	19.1911	0.024263	247.29	1	0	0	0	0	0	0	274000
chr1	303000	303500	chr1	693000	693500	4	10.1648	0.017787	224.883	1	1	0	1	0	0	0	390000
chr1	303000	303500	chr1	700500	701000	5	15.5395	0.017437	286.747	1	0	0	1	0	0	0	397500
chr1	414500	415000	chr1	700500	701000	5	14.0558	0.024055	207.857	1	0	0	0	0	0	0	286000
chr1	447000	447500	chr1	707500	708000	8	29.792	0.025462	314.194	1	0	0	0	0	0	0	260500
chr1	251000	251500	chr1	712500	713000	4	10.8296	0.014876	268.889	1	0	0	0	0	0	0	461500
chr1	106500	107000	chr1	729000	729500	10	48.6136	0.012008	832.778	1	0	0	0	0	0	0	622500
chr1	473500	474000	chr1	729000	729500	5	13.6847	0.026036	192.042	1	0	0	0	0	0	0	255500
chr1	130000	130500	chr1	739000	739500	6	22.8124	0.012826	467.8	1	0	0	0	0	0	0	609000
chr1	207500	208000	chr1	744000	744500	7	28.4629	0.013664	512.295	1	0	0	0	0	0	0	536500
chr1	407000	407500	chr1	753500	754000	4	9.71801	0.020063	199.372	0	0	0	0	1	0	0	346500
chr1	468500	469000	chr1	756500	757000	6	19.0186	0.025004	239.962	1	0	0	0	0	0	0	288000
chr1	447000	447500	chr1	757000	757500	15	74.2649	0.021588	694.83	1	0	0	0	0	0	0	310000
chr1	204000	204500	chr1	762500	763000	4	11.237	0.013352	299.581	1	0	0	0	0	0	0	558500
chr1	407000	407500	chr1	762500	763000	4	9.79689	0.019638	203.687	1	0	0	0	0	0	0	355500
chr1	234500	235000	chr1	771500	772000	10	47.7576	0.013109	762.835	1	0	0	0	0	0	0	537000
chr1	323500	324000	chr1	771500	772000	4	10.6407	0.015653	255.542	1	0	0	0	0	0	0	448000
chr1	432000	432500	chr1	771500	772000	6	19.9	0.021447	279.759	1	0	0	0	0	0	0	339500
chr1	303000	303500	chr1	774500	775000	5	16.2783	0.014829	337.177	1	0	0	1	0	0	0	471500
chr1	160000	160500	chr1	785000	785500	12	62.071	0.012009	999.251	1	0	0	0	0	0	0	625000
chr1	195500	196000	chr1	785000	785500	15	81.724	0.01303	1151.19	0	0	0	0	1	0	0	589500
chr1	438000	438500	chr1	785500	786000	9	37.6033	0.019944	451.264	1	0	0	0	0	0	0	347500
chr1	140000	140500	chr1	789000	789500	4	11.5019	0.012437	321.621	1	0	0	0	0	0	0	649000
chr1	88000	88500	chr1	799000	799500	7	29.4442	0.011779	594.278	1	0	0	0	0	0	0	711000
chr1	490000	490500	chr1	799000	799500	4	9.28254	0.022705	176.173	1	0	0	1	0	0	0	309000
chr1	140000	140500	chr1	823000	823500	4	11.8106	0.011446	349.467	1	0	0	0	0	0	0	683000
chr1	143000	143500	chr1	829500	830000	4	11.6298	0.012016	332.889	0	0	0	1	0	0	0	686500
chr1	304000	304500	chr1	850500	851000	4	11.2193	0.013416	298.151	1	0	0	1	0	0	0	546500
chr1	473000	473500	chr1	850500	851000	4	10.045	0.018368	217.77	1	0	0	1	0	0	0	377500
chr1	364500	365000	chr1	851500	852000	63	230.259	0.014599	4315.36	1	0	0	0	0	0	0	487000
chr1	461000	461500	chr1	851500	852000	87	230.259	0.01803	4825.29	1	0	0	0	0	0	0	390500
chr1	225000	225500	chr1	860000	860500	4	11.3614	0.012915	309.717	1	0	0	1	0	0	0	635000
chr1	220000	220500	chr1	865000	865500	4	11.5359	0.012324	324.57	0	0	0	0	1	0	0	645000
chr1	98000	98500	chr1	868000	868500	9	42.8406	0.010975	820.046	1	0	0	1	0	0	0	770000
chr1	204000	204500	chr1	870000	870500	4	11.6536	0.011939	335.036	1	0	0	0	0	0	0	666000
chr1	323000	323500	chr1	885000	885500	4	11.3965	0.012794	312.647	1	0	0	0	0	0	0	562000
chr1	207500	208000	chr1	897000	897500	6	23.3818	0.011607	516.929	1	0	0	0	0	0	0	689500
chr1	143000	143500	chr1	907500	908000	5	17.6199	0.011166	447.788	0	0	0	0	0	1	0	764500
chr1	94000	94500	chr1	910500	911000	5	17.9516	0.010411	480.261	1	0	0	0	0	0	0	816500
chr1	112500	113000	chr1	910500	911000	5	17.8311	0.010676	468.34	1	0	0	0	0	0	0	798000
chr1	238500	239000	chr1	910500	911000	9	41.9923	0.01209	744.417	1	0	0	0	0	0	0	672000
chr1	271500	272000	chr1	910500	911000	7	29.1459	0.012327	567.859	1	0	0	0	0	0	0	639000
chr1	431000	431500	chr1	912500	913000	28	173.284	0.01499	1867.91	1	0	0	1	0	0	0	481500
chr1	394000	394500	chr1	914500	915000	6	22.5688	0.013396	447.895	1	0	0	0	0	0	0	520500
chr1	342500	343000	chr1	933000	933500	5	17.01	0.012708	393.453	1	1	0	1	0	0	0	590500
chr1	303000	303500	chr1	938000	938500	5	17.2121	0.012177	410.61	1	0	0	1	0	0	0	635000
chr1	140000	140500	chr1	961000	961500	4	12.1511	0.010454	382.629	1	0	0	0	0	0	0	821000
chr1	413500	414000	chr1	979000	979500	4	11.2752	0.013217	302.641	1	0	0	0	0	0	0	565500
chr1	500000	500500	chr1	552000	552500	14	37.576	0.198341	70.5855	1	0	0	0	0	0	0	52000
chr1	529000	529500	chr1	554000	554500	33	90.0015	0.620466	53.1858	1	0	0	1	0	0	0	25000
chr1	540500	541000	chr1	554500	555000	14	11.7787	1.48542	9.42497	0	0	0	1	0	0	0	14000
chr1	554000	554500	chr1	556000	556500	44	18.4763	11.8186	3.72295	1	0	0	0	0	0	0	2000
chr1	553500	554000	chr1	556500	557000	31	9.99449	8.81185	3.51799	1	0	0	0	0	0	0	3000
chr1	554000	554500	chr1	562500	563000	16	8.22052	2.73955	5.84038	1	0	0	0	0	0	0	8500
chr1	554000	554500	chr1	567000	567500	20	24.2713	1.61793	12.3615	1	0	0	0	0	0	0	13000
chr1	554000	554500	chr1	589000	589500	25	71.0281	0.386113	64.7479	1	0	0	0	0	0	0	35000
chr1	583500	584000	chr1	599500	600000	11	7.5869	1.22203	9.0014	1	0	0	0	0	0	0	16000
chr1	535000	535500	chr1	600000	600500	16	51.715	0.137832	116.083	1	0	0	0	0	0	0	65000
chr1	563000	563500	chr1	600000	600500	17	41.8617	0.334921	50.7582	1	0	0	0	0	0	0	37000
chr1	576500	577000	chr1	600000	600500	26	61.6945	0.660513	39.3633	1	0	0	0	0	0	0	23500
chr1	583000	583500	chr1	600000	600500	15	17.9217	1.09287	13.7254	1	0	0	0	0	0	0	17000
chr1	587000	587500	chr1	600000	600500	21	26.4609	1.64325	12.7795	1	0	0	0	0	0	0	13000
chr1	594000	594500	chr1	600000	600500	23	12.9607	4.27252	5.38324	0	0	0	1	0	0	0	6000
chr1	590500	591000	chr1	600500	601000	25	29.8578	2.23329	11.1943	1	0	0	0	0	0	0	10000
chr1	592500	593000	chr1	600500	601000	35	46.2853	2.96656	11.7982	0	0	0	0	1	0	0	8000
chr1	595000	595500	chr1	600500	601000	28	19.4957	4.6706	5.99494	0	0	0	0	1	0	0	5500
chr1	600000	600500	chr1	608000	608500	20	13.9347	2.9816	6.70781	1	0	0	0	0	0	0	8000
chr1	600500	601000	chr1	610000	610500	53	104.769	2.39726	22.1085	1	0	0	0	0	0	0	9500
chr1	607000	607500	chr1	610500	611000	27	9.12151	7.20926	3.74518	1	0	0	0	0	0	0	3500
chr1	600000	600500	chr1	611000	611500	17	14.1543	2.00739	8.46871	1	0	0	0	0	0	0	11000
chr1	600500	601000	chr1	613000	613500	24	33.401	1.69776	14.1362	1	0	0	0	0	0	0	12500
chr1	607000	607500	chr1	626000	626500	10	7.79911	0.932792	10.7205	1	0	0	0	0	0	0	19000
chr1	617000	617500	chr1	639000	639500	9	7.06686	0.770095	11.6869	1	0	0	0	0	0	0	22000
chr1	626000	626500	chr1	639500	640000	40	83.1957	1.54149	25.9489	1	0	0	0	0	0	0	13500
chr1	637000	637500	chr1	639500	640000	40	18.4004	9.95096	4.01971	1	0	0	0	0	0	0	2500
chr1	595500	596000	chr1	640000	640500	34	121.88	0.267778	126.971	0	0	0	0	1	0	0	44500
chr1	598000	598500	chr1	640000	640500	29	96.8032	0.281512	103.015	0	0	0	0	1	0	0	42000
chr1	626000	626500	chr1	640000	640500	46	104.86	1.4777	31.1295	1	0	0	0	0	0	0	14000
chr1	639500	640000	chr1	642500	643000	45	30.0912	8.69119	5.17766	0	0	0	1	0	0	0	3000
chr1	640000	640500	chr1	651000	651500	27	37.406	1.99348	13.5441	0	0	0	0	1	0	0	11000
chr1	639500	640000	chr1	653500	654000	32	59.6846	1.4708	21.7569	1	0	0	0	0	0	0	14000
chr1	640000	640500	chr1	653500	654000	73	201.413	1.52724	47.7986	1	0	0	0	0	0	0	13500
chr1	564000	564500	chr1	664500	665000	5	8.03265	0.089981	55.5673	1	0	0	0	0	0	0	100500
chr1	575500	576000	chr1	664500	665000	5	7.98909	0.090865	55.0267	1	0	0	0	0	0	0	89000
chr1	601000	601500	chr1	670000	670500	6	10.0829	0.123755	48.4829	1	0	0	0	0	0	0	69000
chr1	639000	639500	chr1	699000	699500	7	11.5673	0.17686	39.5793	1	0	0	0	0	0	0	60000
chr1	500000	500500	chr1	709000	709500	8	28.0906	0.031873	250.996	0	0	0	0	1	0	0	209000
chr1	673000	673500	chr1	728500	729000	8	15.2862	0.173674	46.0633	1	0	0	0	0	0	0	55500
chr1	559000	559500	chr1	729000	729500	4	7.23292	0.040613	98.4906	1	0	0	0	0	0	0	170000
chr1	664000	664500	chr1	729000	729500	9	21.2601	0.133125	67.6056	1	0	0	0	0	0	0	65000
chr1	639000	639500	chr1	748500	749000	5	9.24824	0.067869	73.6713	1	0	0	0	0	0	0	109500
chr1	500000	500500	chr1	751500	752000	9	34.976	0.027008	333.235	1	0	0	0	0	0	0	251500
chr1	600000	600500	chr1	755500	756000	17	75.0728	0.044972	378.013	1	0	0	0	1	0	0	155500
chr1	600000	600500	chr1	756000	756500	18	81.1056	0.044665	403	0	0	0	0	1	0	0	156000
chr1	600500	601000	chr1	756500	757000	74	230.259	0.043391	1705.42	1	0	0	0	0	0	0	156000
chr1	537000	537500	chr1	759500	760000	16	75.6017	0.029984	533.618	1	0	0	0	0	0	0	222500
chr1	755000	755500	chr1	759500	760000	53	63.1955	5.63667	9.40271	1	0	0	0	0	0	0	4500
chr1	759500	760000	chr1	765000	765500	25	14.5107	4.67477	5.34786	1	0	0	0	0	0	0	5500
chr1	601000	601500	chr1	765500	766000	4	7.14922	0.041562	96.2418	1	0	0	0	0	0	0	164500
chr1	554500	555000	chr1	768500	769000	5	12.7584	0.031704	157.709	0	0	0	1	0	0	0	214000
chr1	671000	671500	chr1	771500	772000	5	8.08849	0.088848	56.2759	1	0	0	0	0	0	0	100500
chr1	747000	747500	chr1	785000	785500	24	72.054	0.309802	77.4688	1	0	0	0	0	0	0	38000
chr1	761000	761500	chr1	785000	785500	11	13.3374	0.659673	16.6749	0	0	0	0	1	0	0	24000
chr1	692000	692500	chr1	785500	786000	10	29.3626	0.087557	114.211	1	0	0	0	0	0	0	93500
chr1	692500	693000	chr1	785500	786000	16	58.5913	0.08867	180.444	1	0	0	0	0	0	0	93000
chr1	775000	775500	chr1	785500	786000	15	9.54539	2.11465	7.09336	1	0	0	1	0	0	0	10500
chr1	600000	600500	chr1	788000	788500	19	91.2206	0.035793	530.83	1	0	0	1	0	0	0	188000
chr1	518000	518500	chr1	799000	799500	5	13.9645	0.024527	203.857	0	0	0	1	0	0	0	281000
chr1	559000	559500	chr1	799000	799500	5	13.2567	0.028523	175.297	1	0	0	0	0	0	0	240000
chr1	585000	585500	chr1	799000	799500	5	12.8389	0.031166	160.431	1	0	0	0	0	0	0	214000
chr1	633500	634000	chr1	799000	799500	4	7.13436	0.041733	95.8474	1	0	0	1	0	0	0	165500
chr1	785000	785500	chr1	799500	800000	12	8.16959	1.42379	8.4282	1	0	0	0	0	0	0	14500
chr1	785500	786000	chr1	801500	802000	11	7.75946	1.19892	9.1749	1	0	0	0	0	0	0	16000
chr1	785500	786000	chr1	806000	806500	13	16.1732	0.829952	15.6636	1	0	0	0	0	0	0	20500
chr1	600500	601000	chr1	816000	816500	24	126.423	0.030941	775.67	1	0	0	0	0	0	0	215500
chr1	664500	665000	chr1	829500	830000	4	7.06576	0.042529	94.0535	1	0	0	0	0	0	0	165000
chr1	785500	786000	chr1	842500	843000	13	35.3061	0.170982	76.0314	1	0	0	0	0	0	0	57000
chr1	607000	607500	chr1	844000	844500	4	8.51299	0.028463	140.533	1	0	0	0	0	0	0	237000
chr1	760000	760500	chr1	844000	844500	5	7.8913	0.09288	53.8329	1	0	0	0	0	0	0	84000
chr1	664500	665000	chr1	846500	847000	5	12.023	0.037062	134.909	1	0	0	0	1	0	0	182000
chr1	558000	558500	chr1	850500	851000	4	9.15273	0.023637	169.226	1	0	0	1	0	0	0	292500
chr1	802000	802500	chr1	850500	851000	6	7.12881	0.217779	27.5509	1	0	0	1	0	0	0	48500
chr1	817500	818000	chr1	850500	851000	11	17.8744	0.415637	26.4654	1	0	0	1	0	0	0	33000
chr1	829000	829500	chr1	850500	851000	14	19.488	0.790328	17.7142	1	0	0	1	0	0	0	21500
chr1	825000	825500	chr1	851000	851500	27	68.8554	0.576969	46.7963	1	0	0	0	0	0	0	26000
chr1	844000	844500	chr1	851000	851500	46	67.7927	3.48892	13.1846	1	0	0	0	0	0	0	7000
chr1	846000	846500	chr1	851000	851500	22	8.36714	5.16128	4.26251	1	0	0	0	0	0	0	5000
chr1	849000	849500	chr1	851000	851500	34	7.71081	11.5509	2.9435	1	0	0	0	0	0	0	2000
chr1	846000	846500	chr1	851500	852000	42	47.3505	4.61481	9.10113	1	0	0	0	0	0	0	5500
chr1	849000	849500	chr1	851500	852000	66	60.7567	9.94183	6.63862	1	0	0	0	0	0	0	2500
chr1	848500	849000	chr1	864500	865000	11	7.0236	1.30086	8.45591	1	0	0	0	0	0	0	16000
chr1	570500	571000	chr1	865000	865500	6	19.5847	0.022657	264.819	0	0	0	1	0	0	0	294500
chr1	667000	667500	chr1	865000	865500	5	12.6695	0.032307	154.765	1	0	0	0	0	0	0	198000
chr1	811500	812000	chr1	868000	868500	9	19.2049	0.169522	53.0905	1	0	0	1	0	0	0	56500
chr1	827000	827500	chr1	868000	868500	9	15.1103	0.278066	32.3664	0	1	0	1	0	0	0	41000
chr1	840000	840500	chr1	868000	868500	8	7.56141	0.514006	15.564	1	0	0	1	0	0	0	28000
chr1	844500	845000	chr1	868000	868500	16	27.5738	0.67194	23.8116	1	0	0	1	0	0	0	23500
chr1	601000	601500	chr1	868500	869000	8	29.4979	0.026469	302.24	1	0	0	1	0	0	0	267500
chr1	785000	785500	chr1	873500	874000	16	59.1144	0.085742	186.606	0	0	0	1	0	0	0	88500
chr1	601000	601500	chr1	883000	883500	7	24.3954	0.024964	280.404	1	0	0	0	0	0	0	282000
chr1	851000	851500	chr1	884000	884500	33	103.813	0.403744	81.735	1	0	0	0	0	0	0	33000
chr1	559000	559500	chr1	885000	885500	4	9.47842	0.021438	186.585	1	0	0	0	0	0	0	326000
chr1	781000	781500	chr1	889000	889500	5	9.02806	0.07169	69.7447	1	0	0	0	0	0	0	108000
chr1	868000	868500	chr1	896500	897000	8	7.88101	0.490653	16.3048	1	0	0	1	0	0	0	28500
chr1	851000	851500	chr1	897500	898000	39	149.771	0.244523	159.494	1	0	0	0	0	0	0	46500
chr1	634000	634500	chr1	898000	898500	4	8.83438	0.025992	153.894	1	0	0	0	0	0	0	264000
chr1	786000	786500	chr1	899500	900000	8	23.1313	0.060765	131.655	1	0	0	0	0	0	0	113500
chr1	834000	834500	chr1	899500	900000	6	9.8961	0.128031	46.8637	1	0	0	0	0	0	0	65500
chr1	869000	869500	chr1	899500	900000	8	8.61816	0.440453	18.1631	1	0	0	1	0	0	0	30500
chr1	771500	772000	chr1	900000	900500	8	24.0487	0.053887	148.459	1	0	0	0	0	0	0	128500
chr1	634000	634500	chr1	906000	906500	4	8.91292	0.02541	157.418	1	0	0	0	0	0	0	272000
chr1	507500	508000	chr1	908000	908500	5	15.6176	0.017129	291.903	1	0	0	0	1	0	0	400500
chr1	639500	640000	chr1	908000	908500	33	193.978	0.025336	1302.49	1	0	0	0	1	0	0	268500
chr1	588500	589000	chr1	910000	910500	4	9.58131	0.020832	192.012	1	0	0	0	0	0	0	321500
chr1	537000	537500	chr1	910500	911000	4	10.0555	0.018316	218.388	1	0	0	0	0	0	0	373500
chr1	813500	814000	chr1	910500	911000	6	12.0087	0.08738	68.6656	1	0	0	0	0	0	0	97000
chr1	852500	853000	chr1	910500	911000	8	15.3468	0.172183	46.4622	0	0	0	0	1	0	0	58000
chr1	881500	882000	chr1	910500	911000	9	10.5787	0.484863	18.5619	1	0	0	0	0	0	0	29000
chr1	779500	780000	chr1	912500	913000	64	230.259	0.051571	1241.01	1	0	0	0	0	0	0	133000
chr1	909000	909500	chr1	912500	913000	30	12.3191	7.44444	4.02985	1	0	0	0	0	0	0	3500
chr1	553500	554000	chr1	914000	914500	4	9.81334	0.019551	204.593	1	0	0	0	0	0	0	360500
chr1	551000	551500	chr1	914500	915000	5	15.1671	0.018951	263.838	1	0	0	0	0	0	0	363500
chr1	882000	882500	chr1	914500	915000	8	8.78131	0.429966	18.6061	1	0	0	0	0	0	0	32500
chr1	912500	913000	chr1	915000	915500	75	77.2661	10.0855	7.43638	1	0	0	0	0	0	0	2500
chr1	607000	607500	chr1	917500	918000	5	14.5612	0.021599	231.492	1	0	0	0	0	0	0	310500
chr1	910500	911000	chr1	917500	918000	25	21.0357	3.37419	7.40918	1	0	0	0	0	0	0	7000
chr1	706500	707000	chr1	918500	919000	14	63.1953	0.030229	463.131	1	0	0	0	1	0	0	212000
chr1	747000	747500	chr1	918500	919000	29	153.932	0.038173	759.699	1	0	0	0	0	0	0	171500
chr1	878000	878500	chr1	918500	919000	11	22.0148	0.277271	39.6724	1	0	0	1	0	0	0	40500
chr1	884500	885000	chr1	918500	919000	11	18.1302	0.405314	27.1395	1	0	0	0	0	0	0	34000
chr1	911500	912000	chr1	918500	919000	20	11.5527	3.46022	5.77998	1	0	0	0	0	0	0	7000
chr1	914500	915000	chr1	918500	919000	37	27.4692	6.25803	5.9124	1	0	0	0	0	0	0	4000
chr1	912500	913000	chr1	919000	919500	45	60.5129	3.92002	11.4795	1	0	0	0	0	0	0	6500
chr1	912500	913000	chr1	920000	920500	20	12.7859	3.20171	6.24666	1	0	0	0	0	0	0	7500
chr1	918500	919000	chr1	922500	923000	24	7.48379	6.41528	3.74107	1	0	0	0	0	0	0	4000
chr1	918500	919000	chr1	925000	925500	18	7.33286	3.75063	4.7992	0	0	0	1	0	0	0	6500
chr1	868000	868500	chr1	926500	927000	14	39.2162	0.175615	79.7198	1	0	0	1	0	0	0	58500
chr1	912500	913000	chr1	927500	928000	27	48.0729	1.2971	20.8157	1	0	0	0	0	0	0	15000
chr1	912500	913000	chr1	933000	933500	28	63.0954	0.824052	33.9784	1	0	0	1	0	0	0	20500
chr1	771500	772000	chr1	937000	937500	5	11.5059	0.041432	120.68	1	0	0	1	0	0	0	165500
chr1	918500	919000	chr1	943000	943500	19	38.2801	0.628937	30.2097	1	0	0	0	0	0	0	24500
chr1	910500	911000	chr1	953000	953500	7	8.6836	0.282177	24.8071	1	0	0	0	0	0	0	42500
chr1	914500	915000	chr1	961000	961500	7	9.63111	0.239641	29.2104	1	0	0	0	0	0	0	46500
chr1	785500	786000	chr1	967500	968000	12	49.0332	0.036442	329.29	1	0	0	0	0	0	0	182000
chr1	910500	911000	chr1	982500	983000	11	30.9897	0.116784	94.191	1	0	0	0	0	0	0	72000
chr1	984000	984500	chr1	987500	988000	27	8.59154	7.43344	3.63223	1	0	0	0	0	0	0	3500
chr1	868000	868500	chr1	988000	988500	8	23.0874	0.061117	130.896	1	0	0	1	0	0	0	120000
chr1	799000	799500	chr1	989500	990000	4	7.79243	0.034807	114.919	1	0	0	0	0	0	0	190500
chr1	601000	601500	chr1	990000	990500	5	15.338	0.018248	274.003	1	0	0	0	0	0	0	389000
chr1	910500	911000	chr1	990500	991000	7	15.298	0.099341	70.4644	1	0	0	0	0	0	0	80000
chr1	129500	130000	chr1	1003000	1003500	13	71.2953	0.009994	1300.78	1	0	0	0	0	0	0	873500
chr1	207500	208000	chr1	1003500	1004000	5	17.8362	0.010665	468.823	1	0	0	0	0	0	0	796000
chr1	119000	119500	chr1	1004000	1004500	6	24.4825	0.00959	625.652	1	0	0	0	0	0	0	885000
chr1	479000	479500	chr1	1004000	1004500	4	11.2125	0.01344	297.619	1	0	0	1	0	0	0	525000
chr1	440500	441000	chr1	1007500	1008000	4	11.2942	0.01315	304.183	1	0	0	0	0	0	0	567000
chr1	88500	89000	chr1	1008000	1008500	3	6.98956	0.009529	314.828	1	0	0	0	0	0	0	919500
chr1	130000	130500	chr1	1009000	1009500	5	18.1079	0.010076	496.229	0	0	0	1	0	0	0	879000
chr1	447000	447500	chr1	1009000	1009500	6	22.5615	0.013414	447.294	0	0	0	1	0	0	0	562000
chr1	38500	39000	chr1	1011500	1012000	3	7.17399	0.008908	336.776	1	0	0	1	0	0	0	973000
chr1	2000	2500	chr1	1017000	1017500	5	18.7244	0.008859	564.398	1	0	0	0	0	0	0	1015000
chr1	22500	23000	chr1	1019000	1019500	4	12.6521	0.009157	436.824	1	0	0	0	0	0	0	996500
chr1	444000	444500	chr1	1019000	1019500	6	22.9061	0.012615	475.624	1	0	0	0	0	0	0	575000
chr1	2000	2500	chr1	1022500	1023000	4	12.8143	0.008773	455.944	1	0	0	0	0	0	0	1020500
chr1	41500	42000	chr1	1025000	1025500	4	12.7947	0.008818	453.618	1	0	0	0	0	0	0	983500
chr1	189500	190000	chr1	1030500	1031000	11	57.0104	0.010241	1074.11	1	0	0	0	0	0	0	841000
chr1	203500	204000	chr1	1035500	1036000	5	17.9773	0.010355	482.859	1	0	0	0	0	0	0	832000
chr1	278000	278500	chr1	1042000	1042500	4	12.0579	0.010715	373.308	1	0	0	0	0	0	0	764000
chr1	394500	395000	chr1	1042000	1042500	4	11.382	0.012844	311.429	1	0	0	0	0	0	0	647500
chr1	407000	407500	chr1	1051000	1051500	4	11.5149	0.012394	322.737	1	0	0	0	0	0	0	644000
chr1	407000	407500	chr1	1052500	1053000	4	11.5649	0.012228	327.118	1	0	0	0	0	0	0	645500
chr1	104000	104500	chr1	1061500	1062000	5	18.5414	0.009203	543.301	0	0	0	1	0	0	0	957500
chr1	224500	225000	chr1	1065000	1065500	5	18.0186	0.010266	487.045	1	0	0	0	0	0	0	840500
chr1	414500	415000	chr1	1071500	1072000	6	23.0501	0.012299	487.845	1	0	0	0	0	0	0	657000
chr1	303000	303500	chr1	1080500	1081000	6	23.6752	0.01103	543.971	0	1	0	1	0	0	0	777500
chr1	151500	152000	chr1	1084000	1084500	3	6.98241	0.009554	314.005	0	0	0	1	0	0	0	932500
chr1	414000	414500	chr1	1095500	1096000	20	119.199	0.011923	1677.43	1	0	0	0	0	0	0	681500
chr1	96500	97000	chr1	1124500	1125000	3	7.12599	0.009066	330.907	1	0	0	0	0	0	0	1028000
chr1	204000	204500	chr1	1148500	1149000	7	30.9655	0.009395	745.077	1	0	0	0	0	0	0	944500
chr1	298500	299000	chr1	1163500	1164000	3	6.9179	0.009782	306.686	1	0	0	1	1	0	1	865000
chr1	34500	35000	chr1	1174000	1174500	3	7.16193	0.008948	335.27	1	0	0	0	0	0	0	1139500
chr1	130000	130500	chr1	1177500	1178000	3	7.2926	0.008531	351.659	1	0	0	0	1	0	0	1047500
chr1	22500	23000	chr1	1185000	1185500	3	7.47525	0.00798	375.94	1	0	0	0	0	0	0	1162500
chr1	244000	244500	chr1	1191500	1192000	6	24.5382	0.009498	631.712	1	0	0	0	0	0	0	947500
chr1	291500	292000	chr1	1197000	1197500	4	12.4349	0.009698	412.456	1	0	0	0	0	0	0	905500
chr1	414500	415000	chr1	1205500	1206000	6	23.7686	0.010853	552.843	1	0	0	0	0	0	0	791000
chr1	243500	244000	chr1	1210500	1211000	4	12.6603	0.009137	437.78	0	0	0	1	0	0	0	967000
chr1	98500	99000	chr1	1214500	1215000	3	7.46631	0.008006	374.719	1	0	0	0	0	0	0	1116000
chr1	159500	160000	chr1	1221500	1222000	4	12.8667	0.008652	462.321	1	0	0	0	0	0	0	1062000
chr1	308500	309000	chr1	1221500	1222000	4	12.4501	0.009659	414.122	1	0	0	0	0	0	0	913000
chr1	251000	251500	chr1	1222000	1222500	4	12.7189	0.008997	444.593	1	0	0	0	0	0	0	971000
chr1	413500	414000	chr1	1222000	1222500	5	18.0144	0.010275	486.618	1	0	0	0	0	0	0	808500
chr1	145500	146000	chr1	1226000	1226500	3	7.34681	0.008363	358.723	1	0	0	0	0	0	0	1080500
chr1	267000	267500	chr1	1226000	1226500	4	12.6935	0.009057	441.647	1	0	0	1	0	0	0	959000
chr1	324000	324500	chr1	1226000	1226500	3	6.9416	0.009697	309.374	1	0	0	0	0	0	0	902000
chr1	88500	89000	chr1	1230500	1231000	3	7.47542	0.00798	375.94	1	0	0	0	0	0	0	1142000
chr1	203500	204000	chr1	1243000	1243500	5	18.8178	0.008688	575.506	1	0	0	0	0	0	0	1039500
chr1	85000	85500	chr1	1265000	1265500	4	13.3003	0.007715	518.471	0	0	0	1	0	0	0	1180000
chr1	248000	248500	chr1	1295500	1296000	5	18.704	0.008896	562.05	1	0	0	0	0	0	0	1047500
chr1	38000	38500	chr1	1308500	1309000	27	184.678	0.007409	3644.22	1	0	0	1	0	0	0	1270500
chr1	476000	476500	chr1	1308500	1309000	21	129.292	0.010474	2004.96	1	0	0	0	0	0	0	832500
chr1	167500	168000	chr1	1309000	1309500	4	13.1872	0.007949	503.208	1	0	0	0	0	0	0	1141500
chr1	294500	295000	chr1	1309000	1309500	4	12.7913	0.008826	453.206	1	0	0	0	0	0	0	1014500
chr1	485500	486000	chr1	1309000	1309500	8	36.9128	0.010144	788.644	1	0	0	0	0	0	0	823500
chr1	407000	407500	chr1	1315000	1315500	4	12.4211	0.009733	410.973	1	0	0	0	0	0	0	908000
chr1	107500	108000	chr1	1324500	1325000	3	7.4967	0.007918	378.884	0	1	0	1	0	0	0	1217000
chr1	100000	100500	chr1	1348500	1349000	3	7.66942	0.007434	403.551	0	0	0	1	0	0	0	1248500
chr1	417500	418000	chr1	1360000	1360500	3	7.08529	0.009202	326.016	1	0	0	0	0	0	0	942500
chr1	130000	130500	chr1	1363000	1363500	3	7.69516	0.007365	407.332	1	0	0	0	0	0	0	1233000
chr1	130000	130500	chr1	1365500	1366000	3	7.69159	0.007374	406.835	1	0	0	0	0	0	0	1235500
chr1	407000	407500	chr1	1373500	1374000	10	51.2894	0.009132	1095.05	1	0	0	0	0	0	0	966500
chr1	373500	374000	chr1	1380000	1380500	3	7.16913	0.008924	336.172	0	0	0	1	0	0	0	1006500
chr1	431000	431500	chr1	1380000	1380500	3	6.98204	0.009556	313.939	1	0	0	1	0	0	0	949000
chr1	476000	476500	chr1	1380000	1380500	3	6.91383	0.009796	306.247	1	0	0	0	0	0	0	904000
chr1	3000	3500	chr1	1387500	1388000	3	8.05366	0.006452	464.972	1	0	0	0	0	0	0	1384500
chr1	88500	89000	chr1	1391500	1392000	4	13.5935	0.007137	560.46	1	0	0	0	0	0	0	1303000
chr1	203500	204000	chr1	1396500	1397000	5	19.4253	0.007654	653.253	1	0	0	0	0	0	0	1193000
chr1	140000	140500	chr1	1400500	1401000	3	7.70627	0.007335	408.998	1	0	0	0	0	0	0	1260500
chr1	342500	343000	chr1	1408000	1408500	6	25.1377	0.008557	701.18	1	0	0	1	0	0	0	1065500
chr1	207500	208000	chr1	1423000	1423500	4	13.4008	0.007512	532.481	1	0	0	1	0	0	0	1215500
chr1	135500	136000	chr1	1423500	1424000	3	7.86254	0.006924	433.276	0	1	0	1	0	0	0	1288000
chr1	413500	414000	chr1	1423500	1424000	6	25.0846	0.008636	694.766	0	0	0	1	0	0	0	1010000
chr1	437000	437500	chr1	1427500	1428000	4	12.7042	0.009032	442.87	1	0	0	0	0	0	0	990500
chr1	203500	204000	chr1	1429000	1429500	7	32.4381	0.007566	925.192	0	0	0	1	0	0	0	1225500
chr1	431500	432000	chr1	1430000	1430500	6	25.021	0.008731	687.207	1	1	0	1	0	0	0	998500
chr1	322000	322500	chr1	1430500	1431000	28	188.94	0.00853	3282.53	1	0	0	0	0	0	0	1108500
chr1	473000	473500	chr1	1430500	1431000	19	116.464	0.009327	2037.1	1	0	0	0	0	0	0	957500
chr1	79500	80000	chr1	1431000	1431500	3	7.99171	0.006602	454.408	1	0	0	0	0	0	0	1351500
chr1	204000	204500	chr1	1443000	1443500	6	25.989	0.007392	811.688	1	0	0	1	0	0	0	1239000
chr1	291500	292000	chr1	1448500	1449000	3	7.51486	0.007865	381.437	1	0	0	0	0	0	0	1157000
chr1	462000	462500	chr1	1459500	1460000	3	7.08844	0.009191	326.406	1	0	0	0	0	0	0	997500
chr1	407000	407500	chr1	1462000	1462500	4	12.8651	0.008655	462.161	1	0	0	0	0	0	0	1055000
chr1	107500	108000	chr1	1463500	1464000	4	13.8746	0.006623	603.956	1	0	0	1	1	1	0	1356000
chr1	342500	343000	chr1	1470500	1471000	7	31.8493	0.008251	848.382	0	1	0	1	0	0	0	1128000
chr1	261500	262000	chr1	1479500	1480000	3	7.65646	0.007469	401.66	0	1	0	1	0	0	0	1218000
chr1	323500	324000	chr1	1479500	1480000	3	7.49991	0.007908	379.363	0	0	0	1	0	0	0	1156000
chr1	140000	140500	chr1	1480000	1480500	4	13.683	0.006969	573.97	0	0	0	1	0	0	0	1340000
chr1	207000	207500	chr1	1492000	1492500	4	13.4874	0.007341	544.885	1	0	0	0	0	0	0	1285000
chr1	265500	266000	chr1	1492000	1492500	3	7.68262	0.007398	405.515	1	0	0	1	0	0	0	1226500
chr1	323000	323500	chr1	1492000	1492500	4	13.3616	0.007591	526.94	1	0	0	0	0	0	0	1169000
chr1	355000	355500	chr1	1492000	1492500	3	7.44612	0.008065	371.978	0	0	0	1	1	0	1	1137000
chr1	492500	493000	chr1	1492000	1492500	3	7.14603	0.009	333.333	1	0	0	0	0	0	0	999500
chr1	2000	2500	chr1	1495000	1495500	5	20.4797	0.006141	814.2	1	0	0	0	0	0	0	1493000
chr1	251000	251500	chr1	1495500	1496000	3	7.75706	0.007199	416.725	1	0	0	0	0	0	0	1244500
chr1	750500	751000	chr1	1004000	1004500	4	8.62991	0.027544	145.222	1	0	0	0	0	0	0	253500
chr1	875000	875500	chr1	1008000	1008500	5	10.213	0.054719	91.3759	0	0	0	1	0	0	0	133000
chr1	873000	873500	chr1	1008500	1009000	7	19.6611	0.050995	137.268	0	0	0	1	0	0	0	135500
chr1	875000	875500	chr1	1008500	1009000	30	150.37	0.053764	557.994	0	0	0	1	0	0	0	133500
chr1	873500	874000	chr1	1009500	1010000	7	19.5959	0.051496	135.933	0	1	0	0	0	0	0	136000
chr1	875000	875500	chr1	1009500	1010000	9	28.9945	0.053836	167.174	0	1	0	0	0	0	0	134500
chr1	820500	821000	chr1	1011500	1012000	4	7.92508	0.033547	119.236	1	0	0	0	0	0	0	191000
chr1	600000	600500	chr1	1013000	1013500	18	98.3624	0.016892	1065.59	1	0	0	0	0	0	0	413000
chr1	910000	910500	chr1	1014500	1015000	5	8.72183	0.077004	64.9317	1	0	0	0	0	0	0	104500
chr1	868000	868500	chr1	1016500	1017000	5	11.0127	0.046061	108.552	1	0	0	1	0	0	0	148500
chr1	579000	579500	chr1	1019000	1019500	4	10.5413	0.016082	248.725	1	0	0	0	0	0	0	440000
chr1	931500	932000	chr1	1019000	1019500	5	7.95111	0.091643	54.5595	1	0	0	0	0	0	0	87500
chr1	521500	522000	chr1	1019500	1020000	5	16.486	0.014192	352.311	0	0	0	1	0	0	0	498000
chr1	849000	849500	chr1	1019500	1020000	8	26.3317	0.040043	199.785	1	0	0	0	0	0	0	170500
chr1	899500	900000	chr1	1020000	1020500	5	9.5924	0.062632	79.8314	1	0	0	0	0	0	0	120500
chr1	746500	747000	chr1	1023500	1024000	4	9.09072	0.024097	165.996	1	0	0	0	0	0	0	277000
chr1	992500	993000	chr1	1024000	1024500	34	106.444	0.42558	79.891	1	0	0	0	0	0	0	31500
chr1	995000	995500	chr1	1024000	1024500	27	73.4372	0.48411	55.7724	1	0	0	0	0	0	0	29000
chr1	877000	877500	chr1	1024500	1025000	28	141.575	0.047033	595.327	1	0	0	0	0	0	0	147500
chr1	979000	979500	chr1	1024500	1025000	20	58.9405	0.255396	78.3098	1	0	0	0	0	0	0	45500
chr1	728000	728500	chr1	1030500	1031000	12	54.3615	0.023129	518.829	1	0	0	0	0	0	0	302500
chr1	762500	763000	chr1	1030500	1031000	10	41.1932	0.02572	388.802	1	0	0	0	0	0	0	268000
chr1	819000	819500	chr1	1030500	1031000	11	44.9256	0.031489	349.328	1	0	0	0	0	0	0	211500
chr1	957500	958000	chr1	1030500	1031000	14	44.283	0.120658	116.03	1	0	0	0	0	0	0	73000
chr1	982000	982500	chr1	1030500	1031000	10	20.8695	0.215188	46.471	0	0	0	1	0	0	0	48500
chr1	554500	555000	chr1	1034500	1035000	4	10.8018	0.014987	266.898	0	0	0	1	0	0	0	480000
chr1	885000	885500	chr1	1049500	1050000	4	7.02833	0.04297	93.0882	1	0	0	1	0	0	0	164500
chr1	868000	868500	chr1	1050000	1050500	8	27.1061	0.036222	220.86	1	1	0	1	0	0	0	182000
chr1	918500	919000	chr1	1052000	1052500	15	60.7824	0.053917	278.205	1	0	0	0	0	0	0	133500
chr1	601000	601500	chr1	1061000	1061500	4	10.7059	0.015379	260.095	1	0	0	0	0	0	0	460000
chr1	918500	919000	chr1	1072500	1073000	13	51.8572	0.045889	283.292	1	0	0	1	0	0	0	154000
chr1	553500	554000	chr1	1082000	1082500	6	22.6037	0.013312	450.721	1	0	0	0	0	0	0	528500
chr1	802000	802500	chr1	1084000	1084500	4	8.99646	0.024794	161.329	0	0	0	1	0	0	0	282000
chr1	892500	893000	chr1	1085000	1085500	4	7.80652	0.034671	115.37	1	0	0	0	0	0	0	192500
chr1	910500	911000	chr1	1085000	1085500	28	147.925	0.0374	748.663	1	0	0	0	0	0	0	174500
chr1	850500	851000	chr1	1102500	1103000	4	8.66343	0.027286	146.595	1	0	0	1	0	0	0	252000
chr1	554500	555000	chr1	1107500	1108000	4	11.1978	0.013493	296.45	0	0	0	1	0	0	0	553000
chr1	771500	772000	chr1	1110000	1110500	4	9.64068	0.020492	195.198	1	0	0	0	0	0	0	338500
chr1	785000	785500	chr1	1118500	1119000	9	37.3405	0.020553	437.892	1	0	0	0	0	0	0	333500
chr1	947000	947500	chr1	1130500	1131000	4	7.75939	0.035128	113.869	0	0	0	1	0	0	0	183500
chr1	601000	601500	chr1	1131000	1131500	7	28.6285	0.013329	525.171	1	0	0	0	0	0	0	530000
chr1	634000	634500	chr1	1134000	1134500	6	22.1266	0.014516	413.337	0	0	0	1	0	0	0	500000
chr1	851000	851500	chr1	1141500	1142000	28	160.442	0.023811	1175.93	0	0	0	1	0	0	0	290500
chr1	639500	640000	chr1	1146000	1146500	34	220.382	0.014315	2375.13	1	0	0	0	0	0	0	506500
chr1	554500	555000	chr1	1157000	1157500	4	11.6163	0.01206	331.675	0	1	0	0	0	0	0	602500
chr1	868000	868500	chr1	1178000	1178500	7	25.2584	0.021951	318.892	1	0	0	1	1	1	0	310000
chr1	793500	794000	chr1	1185000	1185500	4	10.2885	0.017208	232.45	1	0	0	0	0	0	0	391500
chr1	865000	865500	chr1	1196000	1196500	5	14.832	0.02038	245.339	1	0	0	0	0	0	0	331000
chr1	912500	913000	chr1	1200500	1201000	21	112.322	0.02371	885.702	1	0	0	0	0	0	0	288000
chr1	850500	851000	chr1	1201000	1201500	5	14.9508	0.019864	251.712	1	0	0	1	0	0	0	350500
chr1	851000	851500	chr1	1217500	1218000	23	130.981	0.018957	1213.27	0	0	0	1	0	0	0	366500
chr1	764500	765000	chr1	1221500	1222000	4	10.7035	0.015388	259.943	1	0	0	0	0	0	0	457000
chr1	899500	900000	chr1	1225500	1226000	6	19.8299	0.02171	276.37	1	0	0	0	0	0	0	326000
chr1	600500	601000	chr1	1229500	1230000	43	230.259	0.012089	3556.95	1	0	0	0	0	0	0	629000
chr1	885000	885500	chr1	1290000	1290500	4	10.1786	0.017721	225.721	1	0	0	0	0	0	0	405000
chr1	868000	868500	chr1	1294500	1295000	14	72.0683	0.015861	882.668	1	0	0	1	0	0	0	426500
chr1	507500	508000	chr1	1295000	1295500	117	230.259	0.010515	11127	1	0	0	0	0	0	0	787500
chr1	768500	769000	chr1	1295500	1296000	4	11.0466	0.014047	284.758	1	0	0	0	0	0	0	527000
chr1	568000	568500	chr1	1308000	1308500	10	49.5093	0.010958	912.575	1	0	0	0	0	0	0	740000
chr1	771500	772000	chr1	1312000	1312500	5	16.8658	0.013101	381.65	1	0	0	0	0	0	0	540500
chr1	771500	772000	chr1	1324000	1324500	5	16.7317	0.013476	371.03	1	0	0	1	0	0	0	552500
chr1	601000	601500	chr1	1332500	1333000	4	11.8398	0.011357	352.206	1	0	0	0	0	0	0	731500
chr1	508000	508500	chr1	1348500	1349000	4	12.1364	0.010494	381.17	1	0	0	0	0	0	0	840500
chr1	666500	667000	chr1	1348500	1349000	4	11.6244	0.012034	332.392	1	0	0	0	0	0	0	682000
chr1	670000	670500	chr1	1348500	1349000	4	11.6702	0.011886	336.53	1	0	0	0	0	0	0	678500
chr1	907500	908000	chr1	1348500	1349000	4	10.5169	0.016189	247.081	0	0	0	0	1	0	0	441000
chr1	899500	900000	chr1	1350500	1351000	4	10.6764	0.015503	258.015	1	0	0	0	0	0	0	451000
chr1	910500	911000	chr1	1359000	1359500	9	39.5548	0.015961	563.874	1	0	0	0	0	0	0	448500
chr1	554500	555000	chr1	1362500	1363000	5	17.7235	0.010922	457.792	0	0	0	1	0	0	0	808000
chr1	850500	851000	chr1	1379500	1380000	5	16.6744	0.01364	366.569	1	0	0	1	0	0	0	529000
chr1	907500	908000	chr1	1380000	1380500	5	16.1547	0.015224	328.429	0	0	0	0	1	0	0	472500
chr1	926500	927000	chr1	1380000	1380500	6	21.5707	0.016022	374.485	1	0	0	0	0	0	0	453500
chr1	850500	851000	chr1	1382500	1383000	4	11.1167	0.013788	290.107	1	0	0	1	0	0	0	532000
chr1	500000	500500	chr1	1397000	1397500	8	37.2167	0.009752	820.345	1	0	0	0	0	0	0	897000
chr1	962000	962500	chr1	1400000	1400500	4	10.6691	0.015534	257.5	1	0	0	0	0	0	0	438000
chr1	740000	740500	chr1	1420000	1420500	6	23.2045	0.011971	501.211	0	0	0	0	1	0	0	680000
chr1	746500	747000	chr1	1420000	1420500	12	62.4644	0.011616	1033.06	1	0	0	0	0	0	0	673500
chr1	898000	898500	chr1	1430000	1430500	9	40.7981	0.013851	649.773	1	0	0	1	0	0	0	532000
chr1	865000	865500	chr1	1433500	1434000	4	11.1486	0.013671	292.59	1	0	0	0	0	0	0	568500
chr1	918500	919000	chr1	1449500	1450000	7	28.511	0.013566	515.996	1	0	0	0	0	0	0	531000
chr1	799000	799500	chr1	1454000	1454500	5	17.1641	0.012301	406.471	1	0	0	0	0	0	0	655000
chr1	543500	544000	chr1	1492000	1492500	3	7.03223	0.009382	319.761	1	0	0	0	0	0	0	948500
chr1	885000	885500	chr1	1494500	1495000	4	11.4324	0.012671	315.681	1	0	0	0	0	0	0	609500
chr1	1018000	1018500	chr1	1024000	1024500	25	16.351	4.24411	5.89051	0	0	0	0	1	0	0	6000
chr1	1008000	1008500	chr1	1030500	1031000	9	7.6669	0.71183	12.6435	1	0	0	0	0	0	0	22500
chr1	1013000	1013500	chr1	1030500	1031000	22	37.8658	1.05393	20.8742	1	0	0	0	0	0	0	17500
chr1	1019500	1020000	chr1	1036500	1037000	11	8.48937	1.10523	9.95272	1	0	0	0	0	0	0	17000
chr1	1024000	1024500	chr1	1037000	1037500	26	39.8956	1.61155	16.1335	1	0	0	0	0	0	0	13000
chr1	1024000	1024500	chr1	1037500	1038000	20	25.5324	1.50753	13.2668	1	0	0	0	0	0	0	13500
chr1	1019000	1019500	chr1	1042000	1042500	10	10.506	0.673129	14.856	1	0	0	0	0	0	0	23000
chr1	1024500	1025000	chr1	1044500	1045000	15	21.2827	0.852349	17.5984	1	0	0	0	0	0	0	20000
chr1	1030500	1031000	chr1	1052500	1053000	11	12.129	0.746103	14.7433	1	0	0	0	0	0	0	22000
chr1	1024000	1024500	chr1	1059000	1059500	38	129.406	0.368714	103.061	0	0	0	0	1	0	0	35000
chr1	1030500	1031000	chr1	1072500	1073000	13	28.9013	0.286954	45.3034	1	0	0	1	0	0	0	42000
chr1	1050000	1050500	chr1	1085500	1086000	8	10.0068	0.357985	22.3473	1	0	0	1	0	0	0	35500
chr1	1085500	1086000	chr1	1108500	1109000	20	40.7027	0.661462	30.2361	1	0	0	1	0	0	0	23000
chr1	1123500	1124000	chr1	1135000	1135500	14	9.10807	1.87684	7.45935	1	0	0	1	0	0	0	11500
chr1	1085500	1086000	chr1	1142000	1142500	9	19.1787	0.170048	52.9262	1	0	0	1	0	0	0	56500
chr1	1085500	1086000	chr1	1142500	1143000	8	15.4516	0.169619	47.1645	1	0	0	1	0	0	0	57000
chr1	1135500	1136000	chr1	1163500	1164000	9	10.3639	0.498115	18.0681	1	0	0	0	0	0	0	28000
chr1	1085500	1086000	chr1	1165500	1166000	9	23.8571	0.097721	92.0989	1	0	0	0	1	0	0	80000
chr1	1030500	1031000	chr1	1212500	1213000	8	27.0719	0.036383	219.883	0	0	0	0	1	0	0	182000
chr1	1208000	1208500	chr1	1214500	1215000	18	7.33608	3.74972	4.80036	1	0	0	1	0	0	0	6500
chr1	1157500	1158000	chr1	1221500	1222000	14	40.3627	0.161314	86.7873	1	0	0	1	0	0	0	64000
chr1	1221500	1222000	chr1	1225000	1225500	27	8.48475	7.47803	3.61058	1	0	0	0	0	0	0	3500
chr1	1072000	1072500	chr1	1226000	1226500	4	6.98114	0.043533	91.8843	1	0	0	1	0	0	0	154000
chr1	1215500	1216000	chr1	1294500	1295000	5	7.60619	0.098996	50.5071	1	0	0	1	0	0	0	79000
chr1	1134500	1135000	chr1	1295500	1296000	4	7.01415	0.043139	92.7235	1	0	0	1	0	0	0	161000
chr1	1295000	1295500	chr1	1298500	1299000	31	13.393	7.53963	4.11161	1	0	0	0	0	0	0	3500
chr1	1295000	1295500	chr1	1303000	1303500	32	39.1132	2.9698	10.7751	1	0	0	0	0	0	0	8000
chr1	1258000	1258500	chr1	1308000	1308500	7	10.6609	0.203707	34.3631	1	0	0	1	0	0	0	50000
chr1	1294500	1295000	chr1	1308000	1308500	13	9.66711	1.48645	8.74569	1	0	0	0	0	0	0	13500
chr1	1303000	1303500	chr1	1308000	1308500	25	12.5149	5.1877	4.81909	1	0	0	0	0	0	0	5000
chr1	1167500	1168000	chr1	1308500	1309000	23	108.565	0.050813	452.64	0	0	0	1	0	0	0	141000
chr1	1302000	1302500	chr1	1308500	1309000	19	8.78119	3.75805	5.05581	1	0	0	0	0	0	0	6500
chr1	1304500	1305000	chr1	1308500	1309000	26	9.49882	6.57754	3.95285	0	0	0	0	1	0	0	4000
chr1	1305000	1305500	chr1	1308500	1309000	36	21.0326	7.40319	4.86277	0	0	0	0	1	0	0	3500
chr1	1309000	1309500	chr1	1311000	1311500	48	25.2668	11.3114	4.24352	0	0	0	1	0	0	0	2000
chr1	1308500	1309000	chr1	1312000	1312500	32	15.6237	7.25768	4.40912	1	0	0	0	0	0	0	3500
chr1	1295000	1295500	chr1	1314500	1315000	16	23.7883	0.868207	18.4288	1	0	0	0	0	0	0	19500
chr1	1308500	1309000	chr1	1315000	1315500	23	14.9845	3.81889	6.0227	1	0	0	0	0	0	0	6500
chr1	1295000	1295500	chr1	1321000	1321500	19	39.2894	0.594571	31.9558	1	0	0	1	0	0	0	26000
chr1	1085000	1085500	chr1	1338000	1338500	4	8.81139	0.026164	152.882	1	0	0	0	0	0	0	253000
chr1	1308500	1309000	chr1	1338000	1338500	37	117.214	0.454745	81.3643	1	0	0	0	0	0	0	29500
chr1	1308000	1308500	chr1	1339000	1339500	12	20.5461	0.43695	27.4631	1	0	0	0	0	0	0	31000
chr1	1124000	1124500	chr1	1349000	1349500	4	8.27059	0.030455	131.341	1	0	0	0	0	0	0	225000
chr1	1308500	1309000	chr1	1359500	1360000	20	64.0108	0.196804	101.624	1	0	0	0	0	0	0	51000
chr1	1085000	1085500	chr1	1360000	1360500	4	9.06222	0.024307	164.562	1	0	0	0	0	0	0	275000
chr1	1348500	1349000	chr1	1398500	1399000	6	7.56835	0.200518	29.9225	1	0	0	0	1	0	0	50000
chr1	1261500	1262000	chr1	1420000	1420500	5	11.2282	0.043986	113.673	1	0	0	1	0	0	0	158500
chr1	1349500	1350000	chr1	1420000	1420500	6	10.2462	0.120149	49.938	1	0	0	0	0	0	0	70500
chr1	1135500	1136000	chr1	1420500	1421000	4	9.18366	0.023411	170.86	1	0	0	0	0	0	0	285000
chr1	1308000	1308500	chr1	1428500	1429000	14	53.8918	0.059588	234.947	1	0	0	1	0	0	0	120500
chr1	1413500	1414000	chr1	1430000	1430500	12	10.5857	1.10964	10.8143	0	1	0	1	0	0	0	16500
chr1	1294500	1295000	chr1	1430500	1431000	31	158.626	0.050447	614.506	1	0	0	0	0	0	0	136000
chr1	1315000	1315500	chr1	1430500	1431000	17	69.4329	0.063053	269.614	1	0	0	0	0	0	0	115500
chr1	1344000	1344500	chr1	1430500	1431000	30	136.274	0.086482	346.893	1	0	0	0	0	0	0	86500
chr1	1428500	1429000	chr1	1430500	1431000	33	7.58298	11.0646	2.9825	1	0	0	1	0	0	0	2000
chr1	1420000	1420500	chr1	1431000	1431500	19	18.9441	1.93233	9.8327	1	0	0	0	0	0	0	11000
chr1	1085000	1085500	chr1	1433500	1434000	4	9.59831	0.020734	192.92	1	0	0	0	0	0	0	348500
chr1	1430500	1431000	chr1	1434000	1434500	30	12.611	7.34506	4.08438	1	0	0	0	0	0	0	3500
chr1	1221500	1222000	chr1	1434500	1435000	4	8.15034	0.031496	127	1	0	0	0	0	0	0	213000
chr1	1430500	1431000	chr1	1437000	1437500	29	26.4368	3.75771	7.71746	0	0	0	0	1	0	0	6500
chr1	1430500	1431000	chr1	1438000	1438500	19	10.9815	3.21718	5.90579	1	0	0	0	0	0	0	7500
chr1	1430000	1430500	chr1	1443500	1444000	14	11.2558	1.55301	9.01473	1	1	0	1	0	0	0	13500
chr1	1309000	1309500	chr1	1445000	1445500	5	10.4823	0.051643	96.8185	1	0	0	0	0	0	0	136000
chr1	1430500	1431000	chr1	1446500	1447000	14	14.3317	1.20175	11.6497	1	0	0	0	0	0	0	16000
chr1	1430500	1431000	chr1	1451500	1452000	18	30.9534	0.798866	22.5319	1	0	0	0	0	0	0	21000
chr1	1221500	1222000	chr1	1454000	1454500	5	13.0718	0.029663	168.56	1	0	0	0	0	0	0	232500
chr1	1308000	1308500	chr1	1458000	1458500	8	25.0865	0.047046	170.046	1	0	0	0	0	0	0	150000
chr1	1308500	1309000	chr1	1458500	1459000	22	104.294	0.046829	469.794	1	0	0	0	0	0	0	150000
chr1	1430500	1431000	chr1	1461000	1461500	29	83.5974	0.448861	64.608	1	0	0	1	0	0	0	30500
chr1	1420000	1420500	chr1	1462500	1463000	7	8.86233	0.273844	25.562	1	0	0	0	0	0	0	42500
chr1	1185000	1185500	chr1	1464500	1465000	6	19.1907	0.024265	247.27	0	0	0	0	1	0	0	279500
chr1	1208500	1209000	chr1	1464500	1465000	4	8.57092	0.028005	142.832	0	0	0	0	1	0	0	256000
chr1	1221500	1222000	chr1	1465000	1465500	10	40.6538	0.027182	367.891	0	0	0	0	1	0	0	243500
chr1	1309000	1309500	chr1	1477000	1477500	6	16.2113	0.040964	146.47	1	0	0	1	0	0	0	168000
chr1	1420000	1420500	chr1	1477000	1477500	7	11.6864	0.173588	40.3254	1	0	0	1	0	0	0	57000
chr1	1463500	1464000	chr1	1479500	1480000	19	27.354	1.17191	16.2128	0	0	0	1	0	1	0	16000
chr1	1430500	1431000	chr1	1486000	1486500	19	62.0515	0.171132	111.025	0	0	0	0	1	0	0	55500
chr1	225000	225500	chr1	1504000	1504500	3	7.72162	0.007293	411.353	1	0	0	1	0	0	0	1279000
chr1	140000	140500	chr1	1508500	1509000	4	13.7952	0.006764	591.366	1	0	0	0	0	0	0	1368500
chr1	51500	52000	chr1	1519000	1519500	3	8.11124	0.006315	475.059	1	0	0	0	0	0	0	1467500
chr1	363500	364000	chr1	1519000	1519500	4	13.3333	0.007648	523.013	1	0	0	0	0	0	0	1155500
chr1	493000	493500	chr1	1519000	1519500	3	7.15161	0.008981	334.039	1	0	0	0	0	0	0	1026000
chr1	283500	284000	chr1	1527500	1528000	3	7.66518	0.007446	402.901	1	0	0	0	0	0	0	1244000
chr1	485500	486000	chr1	1529000	1529500	3	7.32386	0.008434	355.703	1	0	0	0	0	0	0	1043500
chr1	407000	407500	chr1	1533500	1534000	4	13.1927	0.007938	503.905	0	0	0	0	1	0	0	1126500
chr1	499500	500000	chr1	1533500	1534000	10	51.8818	0.008593	1163.74	0	0	0	0	1	0	0	1034000
chr1	485500	486000	chr1	1535000	1535500	3	7.33764	0.008391	357.526	1	0	0	0	0	0	0	1049500
chr1	437000	437500	chr1	1538500	1539000	4	13.066	0.008208	487.329	1	0	0	0	0	0	0	1101500
chr1	224500	225000	chr1	1539000	1539500	4	13.6963	0.006944	576.037	1	0	0	0	0	0	0	1314500
chr1	491500	492000	chr1	1547000	1547500	9	45.2794	0.008301	1084.21	0	0	0	0	1	0	0	1055500
chr1	224500	225000	chr1	1549000	1549500	7	32.8096	0.007164	977.108	1	0	0	0	0	0	0	1324500
chr1	414500	415000	chr1	1554000	1554500	5	19.2099	0.008005	624.61	1	0	0	0	0	0	0	1139500
chr1	440500	441000	chr1	1564500	1565000	3	7.41334	0.008163	367.512	1	0	0	0	0	0	0	1124000
chr1	143000	143500	chr1	1597000	1597500	3	8.10045	0.006341	473.111	0	0	0	1	0	0	0	1454000
chr1	344000	344500	chr1	1598000	1598500	3	7.78959	0.007113	421.763	1	0	0	0	0	0	0	1254000
chr1	447000	447500	chr1	1599000	1599500	9	45.9606	0.007684	1171.26	1	0	0	1	0	0	0	1152000
chr1	106500	107000	chr1	1612500	1613000	3	8.20046	0.006108	491.159	1	0	0	0	0	0	0	1506000
chr1	204000	204500	chr1	1614000	1614500	8	40.2413	0.006614	1209.56	0	0	0	1	0	0	0	1410000
chr1	440500	441000	chr1	1614000	1614500	5	19.2585	0.007924	630.994	0	0	0	1	0	0	0	1173500
chr1	411000	411500	chr1	1616000	1616500	5	19.4086	0.007681	650.957	0	0	0	1	0	0	0	1205000
chr1	159000	159500	chr1	1616500	1617000	23	156.768	0.006112	3763.09	0	1	0	1	0	0	0	1457500
chr1	311000	311500	chr1	1616500	1617000	14	83.3071	0.007018	1994.87	0	0	0	1	0	0	0	1305500
chr1	200500	201000	chr1	1617000	1617500	3	7.98692	0.006614	453.583	0	0	0	1	0	0	0	1416500
chr1	314000	314500	chr1	1617000	1617500	4	13.73	0.006882	581.226	0	0	0	1	0	0	0	1303000
chr1	344500	345000	chr1	1630000	1630500	3	7.76709	0.007172	418.293	0	0	0	1	0	0	0	1285500
chr1	244000	244500	chr1	1635000	1635500	5	20.1214	0.006619	755.401	0	0	0	0	1	0	0	1391000
chr1	303000	303500	chr1	1635500	1636000	4	13.7671	0.006815	586.941	0	0	0	0	1	1	0	1332500
chr1	141000	141500	chr1	1639000	1639500	13	77.8997	0.005965	2179.38	1	0	0	0	0	0	0	1498000
chr1	336000	336500	chr1	1639000	1639500	3	7.80276	0.007079	423.789	0	0	0	0	1	0	0	1303000
chr1	389000	389500	chr1	1639000	1639500	3	7.6619	0.007455	402.414	1	0	0	0	0	0	0	1250000
chr1	440500	441000	chr1	1644500	1645000	3	7.58567	0.007665	391.389	1	0	0	0	0	0	0	1204000
chr1	150500	151000	chr1	1676500	1677000	3	8.22429	0.006055	495.458	1	0	0	0	0	0	0	1526000
chr1	136000	136500	chr1	1678000	1678500	3	8.1816	0.006151	487.726	1	0	0	0	0	0	0	1542000
chr1	213500	214000	chr1	1678000	1678500	3	8.19459	0.006122	490.036	1	0	0	0	0	0	0	1464500
chr1	447000	447500	chr1	1683000	1683500	4	13.4649	0.007386	541.565	0	0	0	0	1	0	0	1236000
chr1	98500	99000	chr1	1690000	1690500	3	8.32594	0.005831	514.492	1	0	0	0	0	0	0	1591500
chr1	160000	160500	chr1	1697000	1697500	4	14.3605	0.005822	687.049	1	0	0	0	0	0	0	1537000
chr1	409500	410000	chr1	1697000	1697500	5	19.6705	0.007273	687.474	1	0	0	0	0	0	0	1287500
chr1	303000	303500	chr1	1704000	1704500	6	26.6698	0.006576	912.409	1	0	0	1	0	0	0	1401000
chr1	91000	91500	chr1	1705000	1705500	6	27.4354	0.005763	1041.12	1	0	0	0	0	0	0	1614000
chr1	111000	111500	chr1	1705000	1705500	9	48.757	0.005593	1609.15	1	0	0	0	1	0	0	1594000
chr1	213500	214000	chr1	1705500	1706000	3	8.2404	0.006019	498.422	1	0	0	0	0	0	0	1492000
chr1	395000	395500	chr1	1705500	1706000	3	7.90759	0.00681	440.529	1	0	0	0	0	0	0	1310500
chr1	340500	341000	chr1	1709000	1709500	6	26.4083	0.006878	872.347	0	0	0	0	1	0	0	1368500
chr1	441000	441500	chr1	1713500	1714000	13	75.3766	0.007262	1790.14	1	0	0	0	0	0	0	1272500
chr1	207500	208000	chr1	1724000	1724500	7	33.926	0.006082	1150.94	0	0	0	1	0	0	0	1516500
chr1	362000	362500	chr1	1725000	1725500	7	33.1632	0.006802	1029.11	1	0	0	0	0	0	0	1363000
chr1	404500	405000	chr1	1725000	1725500	8	39.9236	0.006889	1161.27	1	0	0	0	0	0	0	1320500
chr1	428500	429000	chr1	1725000	1725500	10	53.5926	0.007215	1386	1	0	0	1	0	0	0	1296500
chr1	195500	196000	chr1	1725500	1726000	3	7.98334	0.006622	453.035	0	0	0	0	1	0	0	1530000
chr1	280000	280500	chr1	1725500	1726000	3	7.84269	0.006975	430.108	1	0	0	0	0	0	0	1445500
chr1	416500	417000	chr1	1728000	1728500	9	46.7453	0.00703	1280.23	1	0	0	0	0	0	0	1311500
chr1	407000	407500	chr1	1729000	1729500	4	13.7192	0.006902	579.542	1	0	0	0	0	0	0	1322000
chr1	143000	143500	chr1	1731500	1732000	3	8.31096	0.005863	511.683	0	0	0	1	0	0	0	1588500
chr1	143000	143500	chr1	1732000	1732500	3	8.3524	0.005774	519.57	0	0	0	1	0	0	0	1589000
chr1	413500	414000	chr1	1744500	1745000	3	7.83223	0.007002	428.449	0	0	0	0	1	0	0	1331000
chr1	309500	310000	chr1	1748500	1749000	3	8.05412	0.006451	465.044	1	0	0	0	0	0	0	1439000
chr1	234000	234500	chr1	1763500	1764000	4	14.1945	0.006084	657.462	1	0	0	0	0	0	0	1529500
chr1	291500	292000	chr1	1768000	1768500	3	8.11126	0.006315	475.059	1	0	0	0	0	0	0	1476500
chr1	233000	233500	chr1	1771000	1771500	5	20.6318	0.005949	840.477	0	0	0	1	0	0	0	1538000
chr1	308500	309000	chr1	1771000	1771500	5	20.3563	0.006302	793.399	0	0	0	1	0	0	0	1462500
chr1	251000	251500	chr1	1820000	1820500	3	8.37676	0.005722	524.292	0	0	0	1	0	0	0	1569000
chr1	344500	345000	chr1	1820000	1820500	4	14.2102	0.006059	660.175	0	0	0	1	0	0	0	1475500
chr1	259500	260000	chr1	1822000	1822500	3	8.20196	0.006105	491.4	1	0	0	0	0	0	0	1562500
chr1	495000	495500	chr1	1822000	1822500	3	7.82607	0.007018	427.472	1	0	0	0	0	0	0	1327000
chr1	437500	438000	chr1	1832000	1832500	3	8.00249	0.006576	456.204	1	0	0	1	0	0	0	1394500
chr1	117500	118000	chr1	1842000	1842500	49	230.259	0.005527	8865.57	1	0	0	0	1	0	0	1724500
chr1	352500	353000	chr1	1842500	1843000	27	189.259	0.006245	4323.46	0	0	0	1	0	0	0	1490000
chr1	469000	469500	chr1	1846000	1846500	5	20.2249	0.006478	771.843	1	0	0	0	0	0	0	1377000
chr1	207500	208000	chr1	1856500	1857000	5	20.9048	0.00562	889.68	1	0	0	0	0	0	0	1649000
chr1	465000	465500	chr1	1858500	1859000	7	33.3629	0.006606	1059.64	0	0	0	1	0	0	0	1393500
chr1	307500	308000	chr1	1860500	1861000	5	20.6495	0.005927	843.597	1	0	0	1	0	0	0	1553000
chr1	499000	499500	chr1	1860500	1861000	10	54.0125	0.006913	1446.55	1	0	0	1	0	0	0	1361500
chr1	309500	310000	chr1	1878000	1878500	4	14.2563	0.005985	668.338	1	0	0	0	0	0	0	1568500
chr1	305000	305500	chr1	1881000	1881500	6	27.3472	0.005852	1025.29	1	0	0	0	0	0	0	1576000
chr1	233000	233500	chr1	1881500	1882000	18	118.142	0.005558	3238.58	1	0	0	0	0	0	0	1648500
chr1	404000	404500	chr1	1881500	1882000	22	147.856	0.006326	3477.71	1	0	0	0	0	0	0	1477500
chr1	281000	281500	chr1	1882000	1882500	3	8.4274	0.005616	534.188	1	0	0	0	0	0	0	1601000
chr1	414500	415000	chr1	1889000	1889500	4	14.1466	0.006162	649.14	0	0	0	1	0	0	0	1474500
chr1	111500	112000	chr1	1890500	1891000	3	8.57979	0.005307	565.291	0	1	0	1	0	0	0	1779000
chr1	447000	447500	chr1	1894500	1895000	5	20.2162	0.006489	770.535	1	0	0	0	0	0	0	1447500
chr1	440500	441000	chr1	1915500	1916000	3	8.15251	0.006218	482.47	1	0	0	0	0	0	0	1475000
chr1	291500	292000	chr1	1921500	1922000	3	8.39226	0.005689	527.333	1	0	0	0	0	0	0	1630000
chr1	111000	111500	chr1	1926000	1926500	3	8.76005	0.00496	604.839	1	0	0	0	1	0	0	1815000
chr1	292500	293000	chr1	1938000	1938500	4	14.4664	0.00566	706.714	1	0	0	0	0	0	0	1645500
chr1	475500	476000	chr1	1938000	1938500	3	8.19571	0.006119	490.276	1	0	0	0	0	0	0	1462500
chr1	110000	110500	chr1	1941000	1941500	5	21.3996	0.005068	986.582	0	0	0	0	1	0	0	1831000
chr1	260000	260500	chr1	1941000	1941500	7	34.5134	0.005577	1255.16	1	0	0	0	0	0	0	1681000
chr1	296000	296500	chr1	1941000	1941500	6	27.5051	0.005694	1053.74	0	0	0	1	0	0	0	1645000
chr1	337000	337500	chr1	1941000	1941500	3	8.3734	0.005729	523.652	1	0	0	0	1	0	0	1604000
chr1	411000	411500	chr1	1941000	1941500	4	14.2066	0.006065	659.522	1	0	0	0	0	0	0	1530000
chr1	457000	457500	chr1	1941000	1941500	5	20.4118	0.006229	802.697	1	0	0	0	0	0	0	1484000
chr1	129500	130000	chr1	1958000	1958500	13	79.9434	0.005086	2556.04	1	0	0	0	0	0	0	1828500
chr1	174500	175000	chr1	1971000	1971500	8	42.198	0.005149	1553.7	1	0	0	0	0	0	0	1796500
chr1	265500	266000	chr1	1971000	1971500	7	34.7956	0.00535	1308.41	1	0	0	1	0	0	0	1705500
chr1	307000	307500	chr1	1971000	1971500	5	21.0205	0.005486	911.411	1	0	0	0	0	0	0	1664000
chr1	92500	93000	chr1	1987500	1988000	4	15.0171	0.004883	819.169	1	0	0	0	0	0	0	1895000
chr1	142500	143000	chr1	1987500	1988000	8	42.3198	0.005069	1578.22	1	0	0	0	0	0	0	1845000
chr1	312000	312500	chr1	1987500	1988000	4	14.5738	0.0055	727.273	0	0	0	0	1	0	0	1675500
chr1	243500	244000	chr1	1993000	1993500	9	49.2078	0.005314	1693.64	1	0	0	0	0	0	0	1749500
chr1	141000	141500	chr1	1993500	1994000	3	8.66573	0.005139	583.771	1	0	0	0	0	0	0	1852500
chr1	183000	183500	chr1	1996500	1997000	3	8.74624	0.004986	601.685	1	0	0	0	0	0	0	1813500
chr1	403000	403500	chr1	1996500	1997000	3	8.33195	0.005818	515.641	1	0	0	0	0	0	0	1593500
chr1	865000	865500	chr1	1502000	1502500	4	11.6517	0.011945	334.868	1	0	0	0	0	0	0	637000
chr1	850500	851000	chr1	1508500	1509000	6	23.1284	0.012131	494.601	1	0	0	1	0	0	0	658000
chr1	918500	919000	chr1	1509000	1509500	12	61.447	0.012661	947.792	1	0	0	0	0	0	0	590500
chr1	601000	601500	chr1	1510000	1510500	4	12.4256	0.009722	411.438	1	0	0	0	0	0	0	909000
chr1	574500	575000	chr1	1519000	1519500	3	7.00988	0.009459	317.158	1	0	0	0	1	0	0	944500
chr1	645000	645500	chr1	1519000	1519500	4	12.4427	0.009678	413.309	1	0	0	0	0	0	0	874000
chr1	673000	673500	chr1	1519000	1519500	5	17.9685	0.010374	481.974	1	0	0	0	0	0	0	846000
chr1	798500	799000	chr1	1519000	1519500	4	11.9388	0.011061	361.631	1	0	0	0	0	0	0	720500
chr1	864500	865000	chr1	1519000	1519500	4	11.5311	0.01234	324.149	1	0	0	0	0	0	0	654500
chr1	639500	640000	chr1	1523000	1523500	55	230.259	0.009719	5659.02	1	0	0	0	0	0	0	883500
chr1	918500	919000	chr1	1541500	1542000	10	48.3488	0.012338	810.504	1	0	0	0	0	0	0	623000
chr1	603000	603500	chr1	1547000	1547500	3	7.00869	0.009463	317.024	0	0	0	0	1	1	0	944000
chr1	639000	639500	chr1	1552500	1553000	4	12.441	0.009682	413.138	1	0	0	0	0	0	0	913500
chr1	607000	607500	chr1	1556500	1557000	4	12.505	0.00952	420.168	1	0	0	0	0	0	0	949500
chr1	865000	865500	chr1	1572500	1573000	4	11.7147	0.011745	340.57	1	0	0	0	0	0	0	707500
chr1	553500	554000	chr1	1606500	1607000	4	12.8692	0.008646	462.642	1	0	0	1	0	0	0	1053000
chr1	999500	1000000	chr1	1623500	1624000	4	11.6081	0.012086	330.961	1	0	0	0	0	0	0	624000
chr1	757000	757500	chr1	1624000	1624500	4	12.4034	0.009779	409.04	1	0	0	0	0	0	0	867000
chr1	639000	639500	chr1	1636500	1637000	3	7.15089	0.008984	333.927	1	0	0	0	0	0	0	997500
chr1	983000	983500	chr1	1638500	1639000	11	55.107	0.012217	900.385	1	0	0	1	0	0	0	655500
chr1	516500	517000	chr1	1639000	1639500	4	13.044	0.008255	484.555	1	0	0	0	0	0	0	1122500
chr1	554500	555000	chr1	1648500	1649000	3	7.34453	0.00837	358.423	0	0	0	1	0	0	0	1094000
chr1	607000	607500	chr1	1654000	1654500	3	7.23696	0.008706	344.59	1	0	0	0	0	0	0	1047000
chr1	522000	522500	chr1	1676500	1677000	4	13.297	0.007722	518.001	1	0	0	1	0	0	0	1154500
chr1	850500	851000	chr1	1690500	1691000	4	12.1965	0.010329	387.259	1	0	0	1	0	0	0	840000
chr1	574000	574500	chr1	1697000	1697500	3	7.41482	0.008158	367.737	1	0	0	0	1	0	0	1123000
chr1	664000	664500	chr1	1702000	1702500	3	7.23845	0.008701	344.788	1	0	0	0	0	0	0	1038000
chr1	554500	555000	chr1	1702500	1703000	3	7.47832	0.007971	376.364	0	1	0	1	0	0	0	1148000
chr1	667500	668000	chr1	1705000	1705500	5	18.8002	0.00872	573.394	1	0	0	0	0	0	0	1037500
chr1	731000	731500	chr1	1705000	1705500	6	24.6947	0.009242	649.21	0	0	0	1	0	0	0	974000
chr1	670000	670500	chr1	1705500	1706000	3	7.21036	0.008791	341.258	1	0	0	0	0	0	0	1035500
chr1	637500	638000	chr1	1709000	1709500	5	18.9494	0.008453	591.506	1	0	0	0	0	0	0	1071500
chr1	873000	873500	chr1	1709000	1709500	19	115.067	0.010047	1891.11	0	0	0	1	0	0	0	836000
chr1	591000	591500	chr1	1713500	1714000	14	81.2454	0.008151	1717.58	1	0	0	0	0	0	0	1122500
chr1	708000	708500	chr1	1714000	1714500	13	72.6899	0.008962	1450.57	1	0	0	0	0	0	0	1006000
chr1	910500	911000	chr1	1715000	1715500	7	30.1216	0.010643	657.709	1	0	0	0	0	0	0	804500
chr1	664500	665000	chr1	1720500	1721000	3	7.27877	0.008574	349.895	1	0	0	0	0	0	0	1056000
chr1	601000	601500	chr1	1726000	1726500	5	19.2945	0.007865	635.728	1	0	0	1	0	0	0	1125000
chr1	850500	851000	chr1	1747500	1748000	4	12.3453	0.00993	402.82	1	0	0	1	0	0	0	897000
chr1	757500	758000	chr1	1761000	1761500	3	7.11096	0.009116	329.092	1	0	0	0	0	0	0	1003500
chr1	575500	576000	chr1	1763500	1764000	6	25.5933	0.007912	758.342	1	0	0	0	0	0	0	1188000
chr1	659000	659500	chr1	1763500	1764000	6	25.4873	0.008058	744.602	1	0	0	0	0	0	0	1104500
chr1	660000	660500	chr1	1763500	1764000	3	7.38019	0.008262	363.108	1	0	0	1	0	0	0	1103500
chr1	738000	738500	chr1	1763500	1764000	6	25.0504	0.008687	690.687	1	0	0	0	0	0	0	1025500
chr1	743000	743500	chr1	1769500	1770000	3	7.29101	0.008536	351.453	1	0	0	0	0	0	0	1026500
chr1	850500	851000	chr1	1778000	1778500	4	12.5181	0.009487	421.63	1	0	0	1	0	0	0	927500
chr1	865000	865500	chr1	1788500	1789000	7	31.0296	0.009307	752.122	1	0	0	0	0	0	0	923500
chr1	601000	601500	chr1	1789000	1789500	10	53.2444	0.007476	1337.61	1	0	0	0	0	0	0	1188000
chr1	900000	900500	chr1	1808500	1809000	3	7.02866	0.009394	319.353	1	0	0	0	0	0	0	908500
chr1	850500	851000	chr1	1819000	1819500	3	7.09019	0.009186	326.584	1	1	0	1	0	0	0	968500
chr1	914500	915000	chr1	1821500	1822000	8	37.4786	0.009429	848.446	1	0	0	0	0	0	0	907000
chr1	601500	602000	chr1	1822000	1822500	3	7.60293	0.007617	393.856	1	0	0	0	0	0	0	1220500
chr1	608000	608500	chr1	1822000	1822500	3	7.58535	0.007666	391.338	1	0	0	0	0	0	0	1214000
chr1	943000	943500	chr1	1822000	1822500	4	12.3038	0.01004	398.406	1	0	0	0	0	0	0	879000
chr1	785500	786000	chr1	1823000	1823500	11	58.753	0.008711	1262.77	1	0	0	0	0	0	0	1037500
chr1	850500	851000	chr1	1829000	1829500	4	12.6293	0.009212	434.216	1	0	0	1	0	0	0	978500
chr1	873000	873500	chr1	1830000	1830500	4	12.4119	0.009757	409.962	0	1	0	1	0	0	0	957000
chr1	760000	760500	chr1	1832000	1832500	3	7.33984	0.008385	357.782	1	0	0	1	0	0	0	1072000
chr1	602500	603000	chr1	1838000	1838500	3	7.58706	0.007661	391.594	1	0	0	1	0	0	0	1235500
chr1	754500	755000	chr1	1841500	1842000	3	7.33185	0.008409	356.761	1	0	0	0	0	0	0	1087000
chr1	844000	844500	chr1	1842000	1842500	44	230.259	0.009079	4846.35	1	0	0	0	0	0	0	998000
chr1	563500	564000	chr1	1846000	1846500	3	7.71273	0.007317	410.004	1	0	0	0	0	0	0	1282500
chr1	610500	611000	chr1	1846000	1846500	3	7.74247	0.007238	414.479	1	0	0	0	0	0	0	1235500
chr1	844000	844500	chr1	1846000	1846500	3	7.15848	0.008959	334.859	1	0	0	0	0	0	0	1002000
chr1	919500	920000	chr1	1858500	1859000	5	18.413	0.009453	528.933	0	0	0	1	0	0	0	939000
chr1	801500	802000	chr1	1860000	1860500	6	25.1534	0.008534	703.07	0	0	0	1	0	0	0	1058500
chr1	580000	580500	chr1	1860500	1861000	6	26.2091	0.007118	842.933	1	0	0	1	0	0	0	1280500
chr1	553500	554000	chr1	1864500	1865000	4	13.62	0.007087	564.414	1	0	0	0	0	0	0	1311000
chr1	917500	918000	chr1	1878500	1879000	3	7.14414	0.009006	333.111	1	0	0	0	0	0	0	961000
chr1	765000	765500	chr1	1881000	1881500	7	31.8917	0.0082	853.659	1	0	0	0	0	0	0	1116000
chr1	559500	560000	chr1	1881500	1882000	21	137.595	0.007026	2988.9	1	0	0	0	0	0	0	1322000
chr1	613000	613500	chr1	1881500	1882000	15	90.3997	0.007248	2069.54	1	0	0	0	0	0	0	1268500
chr1	516000	516500	chr1	1882000	1882500	4	13.763	0.006822	586.338	1	0	0	0	0	0	0	1366000
chr1	626500	627000	chr1	1899500	1900000	13	75.2071	0.007359	1766.54	0	0	0	1	0	0	0	1273000
chr1	634000	634500	chr1	1905000	1905500	4	13.6637	0.007005	571.021	1	0	0	1	0	0	0	1271000
chr1	785000	785500	chr1	1913000	1913500	6	25.5084	0.008028	747.384	0	0	0	1	0	0	0	1128000
chr1	899500	900000	chr1	1925000	1925500	4	12.8445	0.008703	459.612	1	0	0	0	0	0	0	1025500
chr1	757000	757500	chr1	1934500	1935000	3	7.54642	0.007775	385.852	1	0	0	0	0	0	0	1177500
chr1	676000	676500	chr1	1941000	1941500	3	7.75459	0.007206	416.32	1	0	0	0	0	0	0	1265000
chr1	634000	634500	chr1	1954500	1955000	5	19.8507	0.007005	713.776	1	0	0	0	0	0	0	1320500
chr1	850500	851000	chr1	1955000	1955500	4	13.0551	0.008231	485.968	1	0	0	1	0	0	0	1104500
chr1	757000	757500	chr1	1965000	1965500	4	13.4744	0.007367	542.962	1	0	0	0	0	0	0	1208000
chr1	554500	555000	chr1	1966000	1966500	4	13.9334	0.00652	613.497	0	0	0	1	0	0	0	1411500
chr1	607000	607500	chr1	1966500	1967000	3	7.89616	0.006839	438.661	1	0	0	0	0	0	0	1359500
chr1	981500	982000	chr1	1970500	1971000	13	72.4249	0.00915	1420.77	0	0	0	1	0	0	0	989000
chr1	760000	760500	chr1	1971000	1971500	19	120.976	0.007338	2589.26	1	0	0	0	0	0	0	1211000
chr1	671500	672000	chr1	1975500	1976000	4	13.6024	0.00712	561.798	1	0	0	0	0	0	0	1304000
chr1	991500	992000	chr1	1987500	1988000	5	18.6637	0.008971	557.351	1	0	0	0	1	0	0	996000
chr1	888000	888500	chr1	1988000	1988500	3	7.3629	0.008314	360.837	1	0	0	0	0	0	0	1100000
chr1	899000	899500	chr1	1996500	1997000	3	7.28191	0.008564	350.304	1	0	0	0	0	0	0	1097500
chr1	1019000	1019500	chr1	1508500	1509000	4	10.8814	0.014674	272.591	1	0	0	0	0	0	0	489500
chr1	1218000	1218500	chr1	1519000	1519500	4	9.35917	0.022185	180.302	0	0	0	1	0	0	0	301000
chr1	1348500	1349000	chr1	1519000	1519500	9	31.8591	0.038612	233.088	1	0	0	0	0	0	0	170500
chr1	1411000	1411500	chr1	1519000	1519500	5	9.39059	0.065566	76.259	1	0	0	0	0	0	0	108000
chr1	1465000	1465500	chr1	1519000	1519500	6	8.35286	0.172833	34.7156	0	0	0	0	1	0	0	54000
chr1	1492000	1492500	chr1	1529000	1529500	7	7.83863	0.3244	21.5783	1	0	0	0	0	0	0	37000
chr1	1309000	1309500	chr1	1533500	1534000	5	13.1104	0.029421	169.947	0	0	0	0	1	0	0	224500
chr1	1417500	1418000	chr1	1547000	1547500	5	10.1575	0.055376	90.2918	0	0	0	0	1	0	0	129500
chr1	1221500	1222000	chr1	1561000	1561500	4	9.68519	0.020244	197.589	1	0	0	0	0	0	0	339500
chr1	1308500	1309000	chr1	1563500	1564000	22	116.176	0.027096	811.928	1	0	0	0	0	0	0	255000
chr1	1023500	1024000	chr1	1583500	1584000	4	11.377	0.012861	311.018	1	0	0	0	0	0	0	560000
chr1	1420000	1420500	chr1	1588500	1589000	4	7.24735	0.040452	98.8826	1	0	0	0	0	0	0	168500
chr1	1030500	1031000	chr1	1589000	1589500	18	102.837	0.013136	1370.28	1	0	0	0	0	0	0	558500
chr1	1221500	1222000	chr1	1596000	1596500	4	10.1291	0.017958	222.742	1	0	0	1	0	0	0	374500
chr1	1348500	1349000	chr1	1598500	1599000	4	8.51658	0.028435	140.672	1	0	0	0	0	0	0	250000
chr1	1262000	1262500	chr1	1616000	1616500	4	9.8285	0.019471	205.434	0	1	0	1	0	0	0	354000
chr1	1302000	1302500	chr1	1616000	1616500	4	9.4322	0.021721	184.154	0	0	0	1	0	0	0	314000
chr1	1416500	1417000	chr1	1616000	1616500	5	12.5695	0.033001	151.511	0	1	0	1	0	0	0	199500
chr1	1482000	1482500	chr1	1616000	1616500	6	14.7287	0.053802	111.52	0	0	0	1	0	0	0	134000
chr1	1458000	1458500	chr1	1616500	1617000	22	105.607	0.044078	499.115	0	0	0	1	0	0	0	158500
chr1	1373500	1374000	chr1	1617000	1617500	5	13.4131	0.02759	181.225	0	0	0	1	0	0	0	243500
chr1	1278500	1279000	chr1	1623500	1624000	4	9.70751	0.020121	198.797	1	0	0	0	0	0	0	345000
chr1	1477000	1477500	chr1	1623500	1624000	5	10.8402	0.04778	104.646	1	0	0	1	0	0	0	146500
chr1	1308500	1309000	chr1	1629500	1630000	24	135.024	0.021539	1114.26	0	0	0	1	0	0	0	321000
chr1	1295000	1295500	chr1	1635500	1636000	11	49.6574	0.020277	542.487	0	0	0	0	1	0	0	340500
chr1	1420000	1420500	chr1	1636500	1637000	5	12.8684	0.030971	161.441	1	0	0	0	0	0	0	216500
chr1	1147000	1147500	chr1	1638500	1639000	14	72.9614	0.014865	941.81	1	0	0	0	0	0	0	491500
chr1	1369000	1369500	chr1	1638500	1639000	12	53.3254	0.025257	475.116	1	0	0	0	0	0	0	269500
chr1	1023000	1023500	chr1	1639000	1639500	4	11.4094	0.012749	313.75	1	0	0	0	0	0	0	616000
chr1	1463000	1463500	chr1	1639000	1639500	4	7.35695	0.039249	101.913	1	0	0	0	1	0	0	176000
chr1	1308500	1309000	chr1	1660500	1661000	25	144.061	0.019831	1260.65	1	0	0	0	0	0	0	352000
chr1	1420000	1420500	chr1	1665500	1666000	4	8.56833	0.028025	142.73	1	0	0	0	0	0	0	245500
chr1	1292000	1292500	chr1	1697000	1697500	4	10.2537	0.017369	230.295	1	0	0	0	0	0	0	405000
chr1	1134000	1134500	chr1	1705000	1705500	8	34.8366	0.013283	602.274	0	0	0	1	0	0	0	571000
chr1	1261500	1262000	chr1	1705000	1705500	4	10.5963	0.015842	252.493	1	0	0	1	0	0	0	443500
chr1	1369500	1370000	chr1	1705000	1705500	5	14.7532	0.020727	241.231	1	0	0	0	0	0	0	335500
chr1	1408500	1409000	chr1	1705000	1705500	5	14.2287	0.023187	215.638	1	0	0	0	0	0	0	296500
chr1	1464500	1465000	chr1	1705500	1706000	6	18.3673	0.028008	214.225	0	0	0	0	1	0	0	241000
chr1	1211000	1211500	chr1	1709000	1709500	5	16.44	0.01433	348.918	0	0	0	1	0	0	0	498000
chr1	1230000	1230500	chr1	1709000	1709500	6	21.9586	0.01496	401.07	1	0	0	0	0	0	0	479000
chr1	1239500	1240000	chr1	1709000	1709500	7	27.6185	0.015491	451.875	1	0	0	0	0	0	0	469500
chr1	1449500	1450000	chr1	1713500	1714000	9	35.3668	0.025821	348.554	1	0	0	0	0	0	0	264000
chr1	1495500	1496000	chr1	1713500	1714000	17	81.9333	0.029848	569.552	1	0	0	0	0	0	0	218000
chr1	1003500	1004000	chr1	1714000	1714500	13	69.4318	0.011558	1124.76	1	0	0	0	0	0	0	710500
chr1	1437000	1437500	chr1	1725000	1725500	6	19.3591	0.023563	254.637	0	0	0	0	1	0	0	288000
chr1	1230000	1230500	chr1	1763500	1764000	4	11.1364	0.013715	291.651	1	0	0	0	0	0	0	533500
chr1	1298000	1298500	chr1	1763500	1764000	5	16.0895	0.015438	323.876	1	0	0	0	0	0	0	465500
chr1	1333000	1333500	chr1	1763500	1764000	4	10.4259	0.016589	241.124	1	0	0	0	0	0	0	430500
chr1	1391500	1392000	chr1	1763500	1764000	5	15.1835	0.018883	264.788	1	0	0	0	0	0	0	372000
chr1	1102500	1103000	chr1	1771000	1771500	5	17.2572	0.012062	414.525	0	0	0	1	0	0	0	668500
chr1	1456500	1457000	chr1	1771000	1771500	4	9.44495	0.021642	184.826	0	1	0	1	0	0	0	314500
chr1	1348500	1349000	chr1	1773500	1774000	4	10.5539	0.016026	249.594	1	0	0	0	0	0	0	425000
chr1	1430500	1431000	chr1	1826000	1826500	15	77.2858	0.017591	852.709	1	0	0	0	0	0	0	395500
chr1	1308000	1308500	chr1	1845500	1846000	12	60.7086	0.013479	890.274	1	0	0	0	0	0	0	537500
chr1	1309000	1309500	chr1	1855000	1855500	5	16.6888	0.013598	367.701	1	0	0	0	0	0	0	546000
chr1	1166500	1167000	chr1	1858500	1859000	5	17.3801	0.011751	425.496	0	1	0	0	0	0	0	692000
chr1	1212500	1213000	chr1	1858500	1859000	4	11.5938	0.012133	329.679	0	0	0	0	0	1	0	646000
chr1	1452000	1452500	chr1	1860500	1861000	6	21.2106	0.017066	351.576	1	0	0	1	0	0	0	408500
chr1	1446000	1446500	chr1	1881000	1881500	10	45.7343	0.01612	620.347	1	0	0	0	0	0	0	435000
chr1	1430000	1430500	chr1	1888000	1888500	5	16.0162	0.015685	318.776	1	0	0	1	0	0	0	458000
chr1	1465000	1465500	chr1	1892000	1892500	4	10.5749	0.015933	251.051	0	0	0	0	0	1	0	427000
chr1	1464500	1465000	chr1	1899000	1899500	4	10.5663	0.015971	250.454	0	0	0	0	1	0	0	434500
chr1	1370000	1370500	chr1	1899500	1900000	5	16.6758	0.013636	366.676	0	0	0	1	0	0	0	529500
chr1	1004000	1004500	chr1	1916000	1916500	3	6.9393	0.009705	309.119	1	0	0	0	0	0	0	912000
chr1	1030500	1031000	chr1	1929500	1930000	11	57.8551	0.009469	1161.69	1	0	0	0	0	0	0	899000
chr1	1464500	1465000	chr1	1938000	1938500	8	33.9866	0.014823	539.702	0	0	0	0	1	0	0	473500
chr1	1376500	1377000	chr1	1941000	1941500	4	11.2718	0.013229	302.366	1	0	0	0	0	0	0	564500
chr1	1025000	1025500	chr1	1953000	1953500	3	7.07743	0.009228	325.098	1	0	0	0	0	0	0	928000
chr1	1420000	1420500	chr1	1954000	1954500	9	41.1791	0.013264	678.528	1	0	0	0	0	0	0	534000
chr1	1004000	1004500	chr1	1966500	1967000	3	7.02668	0.009401	319.115	1	0	0	0	0	0	0	962500
chr1	1018500	1019000	chr1	1971000	1971500	5	18.4717	0.009338	535.447	0	0	0	0	1	0	0	952500
chr1	1388000	1388500	chr1	1971000	1971500	8	34.9243	0.013133	609.153	1	0	0	0	0	0	0	583000
chr1	1008500	1009000	chr1	1975500	1976000	4	12.675	0.009102	439.464	1	0	0	0	0	0	0	967000
chr1	1451500	1452000	chr1	1975500	1976000	4	11.1265	0.013752	290.867	1	0	0	0	0	0	0	524000
chr1	1480000	1480500	chr1	1975500	1976000	5	16.3153	0.014713	339.836	0	0	0	1	0	0	0	495500
chr1	1348500	1349000	chr1	1977500	1978000	5	17.2787	0.012007	416.424	1	0	0	0	0	0	0	629000
chr1	1214000	1214500	chr1	1987500	1988000	4	12.0136	0.010841	368.97	1	0	0	0	0	0	0	773500
chr1	1290000	1290500	chr1	1987500	1988000	9	42.0734	0.011979	751.315	1	0	0	0	0	0	0	697500
chr1	1085500	1086000	chr1	1991500	1992000	10	50.7945	0.009609	1040.69	1	0	0	0	0	0	0	906000
chr1	1522000	1522500	chr1	1525500	1526000	126	229.364	7.35756	17.1252	1	0	0	0	0	0	0	3500
chr1	1527500	1528000	chr1	1557000	1557500	9	10.9151	0.46495	19.3569	1	0	0	0	0	0	0	29500
chr1	1519500	1520000	chr1	1576000	1576500	6	8.15291	0.179522	33.4221	1	0	0	0	0	0	0	56500
chr1	1542500	1543000	chr1	1616000	1616500	6	10.4606	0.115591	51.9072	0	0	0	1	0	0	0	73500
chr1	1543500	1544000	chr1	1616000	1616500	6	10.179	0.121616	49.3356	0	0	0	1	0	0	0	72500
chr1	1548500	1549000	chr1	1616000	1616500	6	10.0073	0.125471	47.8198	0	0	0	1	0	0	0	67500
chr1	1583500	1584000	chr1	1616000	1616500	12	21.4598	0.402495	29.814	0	0	0	1	0	0	0	32500
chr1	1597000	1597500	chr1	1616000	1616500	13	14.8939	0.931543	13.9553	0	0	0	1	0	0	0	19000
chr1	1554000	1554500	chr1	1616500	1617000	19	62.7954	0.164404	115.569	0	0	0	1	0	0	0	62500
chr1	1612000	1612500	chr1	1616500	1617000	62	82.6613	5.76009	10.7637	0	0	0	1	0	0	0	4500
chr1	1613500	1614000	chr1	1616500	1617000	48	35.3516	8.61713	5.5703	0	1	0	0	0	0	0	3000
chr1	1614500	1615000	chr1	1616500	1617000	40	14.7524	11.3484	3.52474	0	1	0	0	0	0	0	2000
chr1	1520000	1520500	chr1	1623500	1624000	5	8.57102	0.079687	62.7455	1	0	0	0	0	0	0	103500
chr1	1617000	1617500	chr1	1630000	1630500	13	8.84354	1.61571	8.04599	0	1	0	0	0	0	0	13000
chr1	1616500	1617000	chr1	1636500	1637000	16	24.065	0.851939	18.7807	0	0	0	1	0	0	0	20000
chr1	1529000	1529500	chr1	1638500	1639000	34	169.847	0.064101	530.413	1	0	0	0	0	0	0	109500
chr1	1635500	1636000	chr1	1638500	1639000	35	15.9045	8.50375	4.11583	0	0	0	0	1	0	0	3000
chr1	1638500	1639000	chr1	1647500	1648000	20	16.836	2.4917	8.02666	1	0	0	0	0	0	0	9000
chr1	1616000	1616500	chr1	1662500	1663000	8	12.776	0.244528	32.7161	0	1	0	1	0	0	0	46500
chr1	1616000	1616500	chr1	1665000	1665500	6	7.27619	0.211828	28.3249	0	0	0	1	0	0	0	49000
chr1	1638500	1639000	chr1	1665500	1666000	11	15.1058	0.550829	19.9699	1	0	0	0	0	0	0	27000
chr1	1638500	1639000	chr1	1671000	1671500	11	17.9526	0.412452	26.6698	1	0	0	0	0	0	0	32500
chr1	1638500	1639000	chr1	1677000	1677500	26	80.3523	0.314652	82.631	1	0	0	0	0	0	0	38500
chr1	1638500	1639000	chr1	1680500	1681000	11	21.8555	0.281703	39.0482	1	0	0	0	0	0	0	42000
chr1	1679000	1679500	chr1	1697000	1697500	10	7.05916	1.01941	9.80958	1	0	0	0	0	0	0	18000
chr1	1693000	1693500	chr1	1697000	1697500	26	9.39708	6.61613	3.92979	1	0	0	0	0	0	0	4000
chr1	1575000	1575500	chr1	1705000	1705500	5	10.2175	0.054666	91.4645	1	0	0	0	0	0	0	130000
chr1	1606000	1606500	chr1	1705000	1705500	11	33.7542	0.090006	122.214	1	0	0	1	0	0	0	99000
chr1	1677000	1677500	chr1	1705000	1705500	10	12.8585	0.51669	19.354	1	0	0	0	0	0	0	28000
chr1	1617000	1617500	chr1	1705500	1706000	6	12.1023	0.08593	69.8243	0	0	0	1	0	0	0	88500
chr1	1535000	1535500	chr1	1708500	1709000	4	7.48047	0.037936	105.441	1	0	0	0	0	0	0	173500
chr1	1696500	1697000	chr1	1709000	1709500	14	10.0992	1.71425	8.16684	1	0	0	0	0	0	0	12500
chr1	1637000	1637500	chr1	1713500	1714000	10	27.4267	0.107413	93.0986	1	0	0	0	1	0	0	76500
chr1	1660500	1661000	chr1	1713500	1714000	13	34.3364	0.184846	70.3288	1	0	0	0	0	0	0	53000
chr1	1663500	1664000	chr1	1713500	1714000	10	21.4203	0.202926	49.279	1	0	0	0	0	0	0	50000
chr1	1680500	1681000	chr1	1713500	1714000	9	11.8975	0.411622	21.8647	1	0	0	0	0	0	0	33000
chr1	1690500	1691000	chr1	1713500	1714000	12	15.4878	0.695237	17.2603	1	0	0	0	0	0	0	23000
chr1	1707500	1708000	chr1	1713500	1714000	27	20.3884	4.14345	6.51631	0	0	0	1	0	0	0	6000
chr1	1693500	1694000	chr1	1714000	1714500	26	56.7546	0.805958	32.2597	1	0	0	0	0	0	0	20500
chr1	1703000	1703500	chr1	1714000	1714500	29	42.1778	2.02574	14.3158	1	0	0	1	0	0	0	11000
chr1	1704000	1704500	chr1	1714000	1714500	21	20.7138	2.24918	9.33673	1	0	0	0	0	0	0	10000
chr1	1639000	1639500	chr1	1721000	1721500	7	15.4318	0.097209	72.0098	1	0	0	1	0	0	0	82000
chr1	1705000	1705500	chr1	1721000	1721500	11	7.70754	1.20586	9.12213	1	0	0	1	0	0	0	16000
chr1	1714000	1714500	chr1	1721000	1721500	19	9.75463	3.49508	5.43621	1	0	0	1	0	0	0	7000
chr1	1713500	1714000	chr1	1721500	1722000	17	8.75296	2.9878	5.68981	0	0	0	1	0	0	0	8000
chr1	1529000	1529500	chr1	1723500	1724000	4	7.93982	0.033409	119.728	0	0	0	1	0	0	0	194500
chr1	1697000	1697500	chr1	1724000	1724500	10	12.3225	0.548329	18.2372	0	0	0	1	0	0	0	27000
chr1	1709000	1709500	chr1	1724000	1724500	14	13.1868	1.32105	10.5977	0	0	0	1	0	0	0	15000
chr1	1714000	1714500	chr1	1724000	1724500	20	18.5322	2.25349	8.87511	0	0	0	1	0	0	0	10000
chr1	1644500	1645000	chr1	1725000	1725500	7	15.3342	0.098761	70.8782	1	0	0	0	0	0	0	80500
chr1	1665000	1665500	chr1	1725000	1725500	7	11.7334	0.172314	40.6235	1	0	0	0	0	0	0	60000
chr1	1683000	1683500	chr1	1725000	1725500	7	8.79071	0.277178	25.2545	0	0	0	0	1	0	0	42000
chr1	1713500	1714000	chr1	1726500	1727000	12	7.04293	1.59997	7.50015	1	0	0	1	0	0	0	13000
chr1	1714000	1714500	chr1	1732000	1732500	18	26.9697	1.01781	17.685	1	0	0	0	0	0	0	18000
chr1	1697000	1697500	chr1	1739500	1740000	9	14.8946	0.285572	31.5157	1	0	0	0	0	0	0	42500
chr1	1713500	1714000	chr1	1740500	1741000	12	18.2432	0.537843	22.3113	1	0	0	0	0	0	0	27000
chr1	1605000	1605500	chr1	1763500	1764000	4	6.93572	0.04408	90.7441	0	0	0	1	0	0	0	158500
chr1	1654000	1654500	chr1	1763500	1764000	5	9.37288	0.065838	75.944	1	0	0	0	0	0	0	109500
chr1	1726000	1726500	chr1	1763500	1764000	9	14.0777	0.315496	28.5265	1	0	0	1	0	0	0	37500
chr1	1713500	1714000	chr1	1768000	1768500	14	39.1899	0.175957	79.5649	1	0	0	0	0	0	0	54500
chr1	1638500	1639000	chr1	1769000	1769500	9	28.9083	0.054387	165.481	1	0	0	0	1	0	0	130500
chr1	1564500	1565000	chr1	1771000	1771500	5	12.6815	0.032225	155.159	0	0	0	1	0	0	0	206500
chr1	1769000	1769500	chr1	1771000	1771500	49	26.8781	11.2554	4.35345	0	0	0	1	0	1	0	2000
chr1	1718000	1718500	chr1	1771500	1772000	27	99.5418	0.179793	150.173	0	0	0	1	0	0	0	53500
chr1	1743000	1743500	chr1	1771500	1772000	42	135.224	0.503086	83.4847	0	0	0	1	0	0	0	28500
chr1	1767000	1767500	chr1	1771500	1772000	44	43.1887	5.77804	7.61503	0	0	0	1	0	0	0	4500
chr1	1767500	1768000	chr1	1771500	1772000	61	72.5843	6.64509	9.17971	0	0	0	1	0	0	0	4000
chr1	1771500	1772000	chr1	1774500	1775000	63	63.0393	8.5776	7.34471	0	1	0	1	0	0	0	3000
chr1	1771500	1772000	chr1	1778000	1778500	33	34.6469	3.76015	8.77625	0	0	0	1	0	0	0	6500
chr1	1669000	1669500	chr1	1784000	1784500	5	9.3249	0.066596	75.0796	1	0	0	0	0	0	0	115000
chr1	1771500	1772000	chr1	1785500	1786000	33	62.8679	1.46507	22.5245	0	0	0	1	0	0	0	14000
chr1	1709000	1709500	chr1	1795500	1796000	5	8.05293	0.089567	55.8241	1	0	0	0	0	0	0	86500
chr1	1771500	1772000	chr1	1805000	1805500	40	133.797	0.417389	95.8339	0	0	0	1	0	0	0	33500
chr1	1714000	1714500	chr1	1820500	1821000	19	78.2899	0.071474	265.831	0	0	0	0	1	0	0	106500
chr1	1771000	1771500	chr1	1820500	1821000	6	7.38708	0.207456	28.9218	0	0	0	0	0	1	0	49500
chr1	1771000	1771500	chr1	1821500	1822000	9	18.096	0.193204	46.5829	0	0	0	1	0	0	0	50500
chr1	1504000	1504500	chr1	1822000	1822500	4	9.38116	0.022043	181.464	1	0	0	0	0	0	0	318000
chr1	1617000	1617500	chr1	1830000	1830500	4	8.00884	0.032774	122.048	0	1	0	1	0	0	0	213000
chr1	1725500	1726000	chr1	1838000	1838500	5	9.33423	0.066445	75.2502	1	0	0	0	0	0	0	112500
chr1	1536000	1536500	chr1	1841500	1842000	5	14.4403	0.022164	225.591	1	0	0	0	0	0	0	305500
chr1	1725000	1725500	chr1	1841500	1842000	34	171.532	0.060974	557.615	1	0	0	0	0	0	0	116500
chr1	1839000	1839500	chr1	1842000	1842500	51	40.5862	8.59545	5.93337	1	0	0	0	0	0	0	3000
chr1	1830500	1831000	chr1	1842500	1843000	27	40.2241	1.77735	15.1912	1	0	0	1	0	0	0	12000
chr1	1838500	1839000	chr1	1842500	1843000	66	82.3385	6.80752	9.69516	1	0	0	0	0	0	0	4000
chr1	1725000	1725500	chr1	1845000	1845500	9	27.8286	0.061682	145.91	1	0	0	0	0	0	0	120000
chr1	1599500	1600000	chr1	1846000	1846500	4	8.48878	0.028657	139.582	0	0	0	1	0	0	0	246500
chr1	1842000	1842500	chr1	1849500	1850000	27	25.8653	3.24437	8.3221	1	0	0	0	0	0	0	7500
chr1	1842000	1842500	chr1	1850000	1850500	30	34.399	2.98492	10.0505	1	0	0	0	0	0	0	8000
chr1	1771000	1771500	chr1	1850500	1851000	10	28.2993	0.098036	102.003	0	0	0	1	0	0	0	79500
chr1	1842500	1843000	chr1	1854000	1854500	29	44.1117	1.88215	15.4079	1	0	0	0	0	0	0	11500
chr1	1842500	1843000	chr1	1855500	1856000	50	114.204	1.62204	30.8253	1	0	0	0	0	0	0	13000
chr1	1573500	1574000	chr1	1858500	1859000	8	30.0479	0.024627	324.847	0	0	0	1	0	0	0	285000
chr1	1774500	1775000	chr1	1858500	1859000	5	7.85108	0.093723	53.3487	0	1	0	1	0	0	0	84000
chr1	1777500	1778000	chr1	1858500	1859000	6	11.4202	0.097194	61.7322	0	0	0	1	0	0	0	81000
chr1	1726000	1726500	chr1	1860000	1860500	8	24.4553	0.051101	156.553	0	1	0	1	0	0	0	134000
chr1	1774500	1775000	chr1	1860000	1860500	6	11.7582	0.091418	65.6326	0	1	0	1	0	0	0	85500
chr1	1789500	1790000	chr1	1860000	1860500	7	13.8176	0.124979	56.0094	0	0	0	1	0	0	0	70500
chr1	1805000	1805500	chr1	1860000	1860500	8	15.2423	0.174749	45.7799	0	0	0	1	0	0	0	55000
chr1	1828000	1828500	chr1	1860000	1860500	9	11.807	0.416265	21.6208	0	0	0	1	0	0	0	32000
chr1	1838500	1839000	chr1	1860000	1860500	14	19.2451	0.805538	17.3797	0	0	0	1	0	0	0	21500
chr1	1839000	1839500	chr1	1860000	1860500	12	13.9609	0.804122	14.9231	0	0	0	1	0	0	0	21000
chr1	1854000	1854500	chr1	1860000	1860500	19	7.28621	4.18813	4.53663	0	0	0	1	0	0	0	6000
chr1	1856500	1857000	chr1	1860000	1860500	45	35.32	7.518	5.98563	0	0	0	1	0	0	0	3500
chr1	1828500	1829000	chr1	1860500	1861000	15	31.1951	0.41607	36.0516	1	0	0	1	0	0	0	32000
chr1	1842000	1842500	chr1	1860500	1861000	293	230.259	0.957711	305.938	1	0	0	1	0	0	0	18500
chr1	1858500	1859000	chr1	1862000	1862500	28	9.90475	7.37405	3.7971	0	0	0	1	0	0	0	3500
chr1	1842500	1843000	chr1	1864500	1865000	32	79.9018	0.757705	42.2328	1	0	0	0	0	0	0	22000
chr1	1705000	1705500	chr1	1865000	1865500	6	15.9889	0.042633	140.736	1	0	0	0	0	0	0	160000
chr1	1860000	1860500	chr1	1875000	1875500	12	9.21476	1.27394	9.4196	0	0	0	1	0	0	0	15000
chr1	1705000	1705500	chr1	1878000	1878500	8	26.3735	0.039826	200.874	1	0	0	0	0	0	0	173000
chr1	1818500	1819000	chr1	1881000	1881500	6	8.63661	0.163762	36.6385	1	0	0	0	0	0	0	62500
chr1	1826000	1826500	chr1	1881000	1881500	6	8.42996	0.170329	35.2259	1	0	0	0	0	0	0	55000
chr1	1662000	1662500	chr1	1881500	1882000	23	120.136	0.030537	753.185	0	0	0	1	0	0	0	219500
chr1	1850500	1851000	chr1	1881500	1882000	35	111.574	0.416145	84.1053	1	0	0	0	0	0	0	31000
chr1	1863500	1864000	chr1	1881500	1882000	19	29.4997	1.03407	18.3739	1	0	0	0	0	0	0	18000
chr1	1864500	1865000	chr1	1881500	1882000	19	28.4069	1.10264	17.2314	1	0	0	0	0	0	0	17000
chr1	1858500	1859000	chr1	1882000	1882500	18	34.3524	0.652911	27.5688	0	0	0	1	0	0	0	23500
chr1	1860000	1860500	chr1	1882000	1882500	22	45.5208	0.727066	30.2586	0	0	0	1	0	0	0	22000
chr1	1858500	1859000	chr1	1885500	1886000	11	15.2833	0.540734	20.3427	0	0	0	1	0	0	0	27000
chr1	1842500	1843000	chr1	1887000	1887500	40	150.302	0.27426	145.847	1	0	0	0	0	0	0	44500
chr1	1881500	1882000	chr1	1888000	1888500	28	23.9101	3.8463	7.27973	1	0	0	0	0	0	0	6500
chr1	1842000	1842500	chr1	1889000	1889500	26	88.093	0.231994	112.072	0	0	0	1	0	0	0	47000
chr1	1713500	1714000	chr1	1896000	1896500	11	43.4715	0.036101	304.701	1	0	0	0	0	0	0	182500
chr1	1524500	1525000	chr1	1899500	1900000	9	38.1518	0.018733	480.436	0	1	0	1	0	0	0	375000
chr1	1588000	1588500	chr1	1899500	1900000	8	30.8059	0.022323	358.375	0	0	0	1	0	0	0	311500
chr1	1792500	1793000	chr1	1899500	1900000	9	26.7937	0.069526	129.448	0	0	0	0	0	1	0	107000
chr1	1833000	1833500	chr1	1899500	1900000	6	9.98978	0.125869	47.6686	0	0	0	1	0	0	0	66500
chr1	1856000	1856500	chr1	1899500	1900000	8	12.0771	0.268867	29.7545	0	0	0	1	0	0	0	43500
chr1	1875000	1875500	chr1	1899500	1900000	12	16.9045	0.608198	19.7304	0	0	0	1	0	0	0	24500
chr1	1725000	1725500	chr1	1904500	1905000	5	12.0581	0.036786	135.921	1	0	0	1	0	0	0	179500
chr1	1697000	1697500	chr1	1910000	1910500	4	8.14986	0.031501	126.98	1	0	0	0	0	0	0	213000
chr1	1771500	1772000	chr1	1913500	1914000	37	197.868	0.049905	741.409	0	1	0	0	0	0	0	142000
chr1	1860000	1860500	chr1	1913500	1914000	7	11.3068	0.184222	37.9976	0	1	0	0	0	0	0	53500
chr1	1881500	1882000	chr1	1914500	1915000	25	68.8002	0.423225	59.0702	1	0	0	1	0	0	0	33000
chr1	1881000	1881500	chr1	1920000	1920500	7	8.32551	0.299357	23.3835	1	0	0	1	0	0	0	39000
chr1	1705000	1705500	chr1	1935000	1935500	5	13.1324	0.029284	170.742	1	0	0	0	0	0	0	230000
chr1	1808500	1809000	chr1	1938000	1938500	6	14.7583	0.053515	112.118	1	0	0	0	0	0	0	129500
chr1	1932500	1933000	chr1	1938000	1938500	23	11.6221	4.60775	4.99159	1	0	0	1	0	0	0	5500
chr1	1589000	1589500	chr1	1940500	1941000	4	9.80336	0.019604	204.04	1	0	0	0	0	0	0	351500
chr1	1761000	1761500	chr1	1940500	1941000	5	12.1246	0.036269	137.859	1	0	0	0	0	0	0	179500
chr1	1763500	1764000	chr1	1940500	1941000	13	54.6934	0.036713	354.098	1	0	0	0	0	0	0	177000
chr1	1629500	1630000	chr1	1941000	1941500	5	14.468	0.022033	226.932	0	0	0	1	0	0	0	311500
chr1	1785000	1785500	chr1	1941000	1941500	6	15.7545	0.044505	134.816	1	0	0	0	0	0	0	156000
chr1	1886500	1887000	chr1	1941000	1941500	6	8.24925	0.176262	34.0402	1	0	0	0	0	0	0	54500
chr1	1915500	1916000	chr1	1941000	1941500	9	9.11236	0.58676	15.3385	1	0	0	0	0	0	0	25500
chr1	1934500	1935000	chr1	1941000	1941500	20	10.1725	3.78162	5.28874	1	0	0	0	0	0	0	6500
chr1	1858500	1859000	chr1	1946000	1946500	6	11.9267	0.088681	67.6582	0	1	0	1	0	0	0	87500
chr1	1900000	1900500	chr1	1953000	1953500	6	7.89158	0.188667	31.8021	0	0	0	1	0	0	0	53000
chr1	1881000	1881500	chr1	1953500	1954000	10	26.1041	0.123296	81.1056	1	0	0	0	0	0	0	72500
chr1	1616500	1617000	chr1	1955500	1956000	15	75.2531	0.020186	743.089	0	0	0	1	0	0	0	339000
chr1	1527500	1528000	chr1	1970500	1971000	44	230.259	0.015559	2827.95	1	0	0	0	0	0	0	443000
chr1	1912500	1913000	chr1	1970500	1971000	14	39.5839	0.170892	81.9231	0	0	0	1	0	0	0	58000
chr1	1937500	1938000	chr1	1970500	1971000	23	61.8495	0.404017	56.9283	1	0	0	0	0	0	0	33000
chr1	1885500	1886000	chr1	1971000	1971500	7	15.9079	0.090007	77.7717	1	0	0	0	0	0	0	85500
chr1	1678500	1679000	chr1	1975500	1976000	6	19.4662	0.023129	259.415	1	0	0	0	0	0	0	297000
chr1	1921000	1921500	chr1	1975500	1976000	6	8.44525	0.169836	35.3282	1	0	0	0	0	0	0	54500
chr1	1941000	1941500	chr1	1977000	1977500	7	7.17168	0.361764	19.3496	1	0	0	0	0	0	0	36000
chr1	1968500	1969000	chr1	1977500	1978000	15	7.19944	2.60059	5.76793	1	0	0	0	0	0	0	9000
chr1	1552500	1553000	chr1	1987500	1988000	6	21.5405	0.016107	372.509	1	0	0	0	0	0	0	435000
chr1	1679000	1679500	chr1	1987500	1988000	6	19.708	0.022176	270.563	1	0	0	0	0	0	0	308500
chr1	1818500	1819000	chr1	1987500	1988000	5	11.6603	0.040071	124.779	1	0	0	0	0	0	0	169000
chr1	1838500	1839000	chr1	1987500	1988000	12	45.7026	0.048429	247.785	1	0	0	0	0	0	0	149000
chr1	1854500	1855000	chr1	1987500	1988000	5	10.3628	0.052986	94.3645	1	0	0	0	0	0	0	133000
chr1	1970500	1971000	chr1	1988000	1988500	38	91.1773	1.03693	36.6465	1	0	0	0	0	0	0	17500
chr1	1941000	1941500	chr1	1990000	1990500	8	14.1251	0.203607	39.2914	1	0	0	0	0	0	0	49000
chr1	1763500	1764000	chr1	1991500	1992000	4	8.36917	0.029628	135.007	1	0	0	0	0	0	0	228000
chr1	1705000	1705500	chr1	1992000	1992500	6	19.2321	0.02409	249.066	0	0	0	0	1	0	0	287000
chr1	1970500	1971000	chr1	1993000	1993500	19	35.7741	0.72436	26.2301	1	0	0	0	0	0	0	22500
chr1	1858500	1859000	chr1	1997000	1997500	6	15.0065	0.051174	117.247	0	1	0	1	0	0	0	138500
chr1	248000	248500	chr1	2003000	2003500	3	8.50593	0.005455	549.954	0	0	0	1	0	0	0	1755000
chr1	468500	469000	chr1	2003000	2003500	3	8.11887	0.006297	476.417	0	0	0	1	0	0	0	1534500
chr1	407000	407500	chr1	2007500	2008000	5	20.6412	0.005938	842.034	1	0	0	0	0	0	0	1600500
chr1	130000	130500	chr1	2012000	2012500	5	21.5335	0.004927	1014.82	1	0	0	0	1	0	0	1882000
chr1	342500	343000	chr1	2014500	2015000	6	27.6904	0.005515	1087.94	1	0	0	1	0	0	0	1672000
chr1	292000	292500	chr1	2026000	2026500	8	41.8427	0.005388	1484.78	1	0	0	0	0	0	0	1734000
chr1	207500	208000	chr1	2034500	2035000	5	21.4027	0.005064	987.362	1	0	0	0	1	0	0	1827000
chr1	303000	303500	chr1	2034500	2035000	4	14.6956	0.005324	751.315	1	0	0	1	1	1	0	1731500
chr1	447000	447500	chr1	2035000	2035500	4	14.3876	0.00578	692.042	1	0	0	0	0	0	0	1588000
chr1	344500	345000	chr1	2036500	2037000	3	8.49728	0.005473	548.145	1	0	0	0	0	0	0	1692000
chr1	140000	140500	chr1	2060500	2061000	4	15.0178	0.004882	819.336	1	0	0	1	0	0	0	1920500
chr1	407000	407500	chr1	2060500	2061000	5	20.9214	0.005601	892.698	1	0	0	1	0	0	0	1653500
chr1	150500	151000	chr1	2067500	2068000	3	8.79628	0.004893	613.121	1	0	0	0	0	0	0	1917000
chr1	491500	492000	chr1	2079000	2079500	3	8.31236	0.00586	511.945	1	0	0	0	0	0	0	1587500
chr1	96500	97000	chr1	2082000	2082500	3	8.96952	0.004578	655.308	1	0	0	1	0	0	0	1985500
chr1	98500	99000	chr1	2082500	2083000	4	15.1056	0.004767	839.102	1	0	0	1	0	0	0	1984000
chr1	437000	437500	chr1	2090000	2090500	4	14.4539	0.005678	704.473	1	0	0	0	1	0	0	1653000
chr1	394000	394500	chr1	2093000	2093500	3	8.47636	0.005515	543.971	1	0	0	0	0	0	0	1699000
chr1	104000	104500	chr1	2120000	2120500	4	15.218	0.004623	865.239	0	0	0	1	0	0	0	2016000
chr1	71000	71500	chr1	2121500	2122000	4	15.1655	0.00469	852.878	1	0	0	0	0	0	0	2050500
chr1	274500	275000	chr1	2121500	2122000	4	14.8929	0.00505	792.079	1	0	0	1	0	0	0	1847000
chr1	310000	310500	chr1	2121500	2122000	5	21.3004	0.005174	966.37	1	0	0	0	0	0	0	1811500
chr1	130000	130500	chr1	2125500	2126000	3	8.88175	0.004736	633.446	1	0	0	0	0	0	0	1995500
chr1	130000	130500	chr1	2126000	2126500	5	21.8816	0.004578	1092.18	1	0	0	0	0	0	0	1996000
chr1	288000	288500	chr1	2127000	2127500	3	8.71203	0.005051	593.942	0	0	0	1	0	0	0	1839000
chr1	309500	310000	chr1	2144000	2144500	4	14.8468	0.005113	782.32	1	0	0	0	0	0	0	1834500
chr1	342500	343000	chr1	2144000	2144500	7	34.983	0.005204	1345.12	1	0	0	1	0	0	0	1801500
chr1	136500	137000	chr1	2144500	2145000	3	8.88578	0.004729	634.384	1	0	0	0	0	0	0	2008000
chr1	499500	500000	chr1	2151000	2151500	8	41.5574	0.005589	1431.38	1	0	0	0	1	0	0	1651500
chr1	246500	247000	chr1	2154500	2155000	3	8.76536	0.004951	605.938	1	0	0	0	0	0	0	1908000
chr1	468500	469000	chr1	2154500	2155000	3	8.38599	0.005703	526.039	1	0	0	0	0	0	0	1686000
chr1	414500	415000	chr1	2156500	2157000	5	21.2102	0.005273	948.227	1	0	0	0	0	0	0	1742000
chr1	310000	310500	chr1	2159500	2160000	3	8.6961	0.005081	590.435	1	0	0	0	1	0	0	1849500
chr1	213500	214000	chr1	2164000	2164500	3	8.9255	0.004657	644.192	1	0	0	0	0	0	0	1950500
chr1	203500	204000	chr1	2182500	2183000	4	15.1654	0.00469	852.878	1	0	0	0	0	0	0	1979000
chr1	9500	10000	chr1	2187000	2187500	3	9.11929	0.00431	696.056	1	0	0	0	0	0	0	2177500
chr1	86000	86500	chr1	2191000	2191500	3	9.0384	0.004454	673.552	1	0	0	0	0	0	0	2105000
chr1	167500	168000	chr1	2191000	2191500	3	8.94805	0.004616	649.913	1	0	0	0	0	0	0	2023500
chr1	228500	229000	chr1	2191000	2191500	3	8.83313	0.004825	621.762	1	0	0	1	0	0	0	1962500
chr1	453500	454000	chr1	2191000	2191500	3	8.60353	0.00526	570.342	1	0	0	0	0	0	0	1737500
chr1	461000	461500	chr1	2191000	2191500	4	14.6676	0.005364	745.712	1	0	0	0	0	0	0	1730000
chr1	277500	278000	chr1	2199000	2199500	3	8.79016	0.004904	611.746	1	0	0	0	1	0	0	1921500
chr1	140000	140500	chr1	2200000	2200500	3	8.95436	0.004605	651.466	1	0	0	0	0	0	0	2060000
chr1	414500	415000	chr1	2201500	2202000	5	21.2218	0.00526	950.57	1	0	0	1	0	0	0	1787000
chr1	303000	303500	chr1	2220000	2220500	5	21.6675	0.00479	1043.84	1	0	0	1	0	0	0	1917000
chr1	292000	292500	chr1	2224000	2224500	10	57.1662	0.005013	1994.81	1	0	0	0	1	0	0	1932000
chr1	292000	292500	chr1	2227000	2227500	6	28.3873	0.004888	1227.5	0	0	0	1	1	0	1	1935000
chr1	414500	415000	chr1	2227000	2227500	4	14.8051	0.00517	773.694	0	0	0	1	1	0	1	1812500
chr1	428000	428500	chr1	2234500	2235000	7	35.2409	0.00501	1397.21	1	0	0	1	0	0	0	1806500
chr1	344500	345000	chr1	2236500	2237000	3	8.76402	0.004953	605.694	1	0	0	0	0	0	0	1892000
chr1	323000	323500	chr1	2237500	2238000	3	8.72775	0.005021	597.491	1	0	0	0	0	0	0	1914500
chr1	2000	2500	chr1	2245000	2245500	5	22.1275	0.004342	1151.54	1	0	0	0	0	0	0	2243000
chr1	309500	310000	chr1	2254000	2254500	3	8.90548	0.004693	639.25	1	0	0	0	0	0	0	1944500
chr1	203500	204000	chr1	2280500	2281000	8	42.9824	0.004655	1718.58	0	0	0	1	0	0	0	2077000
chr1	309500	310000	chr1	2281000	2281500	4	15.117	0.004753	841.574	0	0	0	0	1	0	0	1971500
chr1	447000	447500	chr1	2303000	2303500	5	21.581	0.004878	1025.01	1	0	0	0	0	0	0	1856000
chr1	104000	104500	chr1	2312500	2313000	6	29.0534	0.00435	1379.31	0	1	0	1	0	0	0	2208500
chr1	39000	39500	chr1	2317000	2317500	3	9.07732	0.004385	684.151	1	0	0	0	0	0	0	2278000
chr1	184000	184500	chr1	2317000	2317500	3	9.00068	0.004522	663.423	1	0	0	0	0	0	0	2133000
chr1	276500	277000	chr1	2326000	2326500	3	9.01083	0.004504	666.075	1	0	0	0	0	0	0	2049500
chr1	358500	359000	chr1	2326000	2326500	3	8.77819	0.004927	608.89	1	0	0	0	1	0	0	1967500
chr1	207500	208000	chr1	2333000	2333500	8	43.5098	0.004349	1839.5	1	0	0	0	0	0	0	2125500
chr1	71000	71500	chr1	2356500	2357000	3	9.08092	0.004379	685.088	1	0	0	0	0	0	0	2285500
chr1	294000	294500	chr1	2356500	2357000	3	8.97238	0.004573	656.024	1	0	0	0	0	0	0	2062500
chr1	2500	3000	chr1	2369000	2369500	25	182.013	0.004287	5831.58	1	0	0	0	0	0	0	2366500
chr1	251000	251500	chr1	2375000	2375500	3	8.98477	0.00455	659.341	1	0	0	0	0	0	0	2124000
chr1	417000	417500	chr1	2383500	2384000	21	145.275	0.004856	4324.55	1	0	0	0	0	0	0	1966500
chr1	187000	187500	chr1	2397500	2398000	3	9.04699	0.004439	675.828	0	0	0	0	1	0	0	2210500
chr1	344000	344500	chr1	2398000	2398500	5	21.9931	0.00447	1118.57	1	0	0	0	0	0	0	2054000
chr1	243500	244000	chr1	2402500	2403000	3	9.05747	0.00442	678.733	1	0	0	0	0	0	0	2159000
chr1	106500	107000	chr1	2404000	2404500	3	9.09269	0.004358	688.389	1	0	0	1	0	0	0	2297500
chr1	98500	99000	chr1	2404500	2405000	3	9.13987	0.004274	701.919	0	0	0	0	1	0	0	2306000
chr1	88500	89000	chr1	2423000	2423500	3	9.15292	0.004251	705.716	1	0	0	0	0	0	0	2334500
chr1	69000	69500	chr1	2424000	2424500	7	36.5105	0.00415	1686.75	0	0	0	1	0	0	0	2355000
chr1	456500	457000	chr1	2424000	2424500	3	8.84879	0.004796	625.521	0	0	0	1	0	0	0	1967500
chr1	414500	415000	chr1	2429500	2430000	5	21.8098	0.004648	1075.73	1	0	0	0	0	0	0	2015000
chr1	413500	414000	chr1	2430500	2431000	3	8.91458	0.004677	641.437	1	0	0	0	0	0	0	2017000
chr1	243000	243500	chr1	2433000	2433500	36	230.259	0.004508	7985.8	1	0	0	1	0	0	0	2190000
chr1	225500	226000	chr1	2433500	2434000	3	9.03489	0.004461	672.495	1	0	0	1	0	0	0	2208000
chr1	312500	313000	chr1	2439000	2439500	6	28.7292	0.004605	1302.93	0	0	0	1	0	0	0	2126500
chr1	309000	309500	chr1	2441500	2442000	3	8.91345	0.004679	641.163	1	0	0	1	0	0	0	2132500
chr1	68000	68500	chr1	2442000	2442500	4	15.4198	0.004371	915.122	1	0	0	0	0	0	0	2374000
chr1	183500	184000	chr1	2442000	2442500	3	9.07451	0.00439	683.371	1	0	0	0	0	0	0	2258500
chr1	265500	266000	chr1	2469500	2470000	3	9.09072	0.004361	687.916	0	1	0	1	0	0	0	2204000
chr1	432000	432500	chr1	2473500	2474000	3	8.77783	0.004927	608.89	1	0	0	0	0	0	0	2041500
chr1	414500	415000	chr1	2475000	2475500	5	21.9617	0.0045	1111.11	1	0	0	0	0	0	0	2060500
chr1	308500	309000	chr1	2494000	2494500	3	9.04669	0.00444	675.676	1	0	0	0	0	0	0	2185500
chr1	413500	414000	chr1	2495500	2496000	3	9.01115	0.004503	666.223	0	0	0	1	0	0	0	2082000
chr1	634000	634500	chr1	2006500	2007000	4	13.841	0.006682	598.623	1	0	0	0	0	0	0	1372500
chr1	729000	729500	chr1	2024000	2024500	3	7.78902	0.007115	421.644	1	0	0	0	0	0	0	1295000
chr1	914500	915000	chr1	2031000	2031500	3	7.3377	0.008391	357.526	1	0	0	0	0	0	0	1116500
chr1	785500	786000	chr1	2055500	2056000	13	75.3634	0.00727	1788.17	1	0	0	0	0	0	0	1270000
chr1	899500	900000	chr1	2057000	2057500	3	7.52636	0.007832	383.044	1	0	0	0	0	0	0	1157500
chr1	617000	617500	chr1	2067000	2067500	3	8.0016	0.006578	456.066	1	0	0	0	0	0	0	1450000
chr1	543500	544000	chr1	2067500	2068000	3	8.22612	0.00605	495.868	1	0	0	0	0	0	0	1524000
chr1	793500	794000	chr1	2067500	2068000	5	19.849	0.007007	713.572	1	0	0	0	0	0	0	1274000
chr1	842500	843000	chr1	2067500	2068000	3	7.66021	0.007459	402.199	1	0	0	0	0	0	0	1225000
chr1	957500	958000	chr1	2067500	2068000	3	7.33942	0.008386	357.739	1	0	0	0	0	0	0	1110000
chr1	601000	601500	chr1	2070000	2070500	7	33.6581	0.006326	1106.54	1	0	0	0	0	0	0	1469000
chr1	602500	603000	chr1	2072000	2072500	3	8.05449	0.00645	465.116	1	0	0	1	0	0	0	1469500
chr1	712500	713000	chr1	2078500	2079000	3	8.01291	0.006551	457.945	1	0	0	0	0	0	0	1366000
chr1	738000	738500	chr1	2078500	2079000	3	7.91189	0.006799	441.241	1	0	0	0	0	0	0	1340500
chr1	554500	555000	chr1	2089500	2090000	4	14.2375	0.006015	665.004	0	0	0	1	0	0	0	1535000
chr1	865000	865500	chr1	2090500	2091000	3	7.61125	0.007594	395.049	1	0	0	0	1	0	0	1225500
chr1	912500	913000	chr1	2091500	2092000	25	167.561	0.007678	3256.06	0	0	0	1	0	0	0	1179000
chr1	601000	601500	chr1	2092000	2092500	8	40.695	0.006241	1281.85	1	0	0	0	0	0	0	1491000
chr1	555500	556000	chr1	2092500	2093000	3	8.21354	0.006079	493.502	1	0	0	1	0	0	0	1537000
chr1	707500	708000	chr1	2093500	2094000	3	8.06218	0.006432	466.418	1	0	0	0	0	0	0	1386000
chr1	516000	516500	chr1	2103500	2104000	5	20.7416	0.005815	859.845	1	0	0	0	0	0	0	1587500
chr1	947500	948000	chr1	2104000	2104500	3	7.4562	0.008036	373.32	0	0	0	1	0	0	0	1156500
chr1	639000	639500	chr1	2105500	2106000	3	8.1199	0.006295	476.569	0	0	0	0	1	0	0	1466500
chr1	601500	602000	chr1	2107000	2107500	3	8.16431	0.006191	484.574	1	0	0	1	0	0	0	1505500
chr1	620500	621000	chr1	2107000	2107500	3	8.15811	0.006205	483.481	1	0	0	1	0	0	0	1486500
chr1	691500	692000	chr1	2107500	2108000	24	163.501	0.006501	3691.74	1	0	0	1	0	0	0	1416000
chr1	818500	819000	chr1	2108000	2108500	4	13.5939	0.007136	560.538	1	0	0	1	0	0	0	1289500
chr1	844000	844500	chr1	2108000	2108500	5	19.6812	0.007257	688.99	1	0	0	1	0	0	0	1264000
chr1	789000	789500	chr1	2121000	2121500	8	39.6985	0.007091	1128.19	1	0	0	0	0	0	0	1332000
chr1	709500	710000	chr1	2121500	2122000	3	8.05095	0.006459	464.468	0	0	0	0	1	0	0	1412000
chr1	764500	765000	chr1	2121500	2122000	4	13.792	0.00677	590.842	1	0	0	0	0	0	0	1357000
chr1	756500	757000	chr1	2127500	2128000	3	8.01882	0.006536	458.996	1	0	0	0	0	0	0	1371000
chr1	910000	910500	chr1	2145000	2145500	4	13.5448	0.00723	553.25	1	0	0	0	0	0	0	1235000
chr1	820500	821000	chr1	2159000	2159500	4	13.6243	0.007079	565.052	1	0	0	0	0	0	0	1338500
chr1	639000	639500	chr1	2160500	2161000	4	14.164	0.006133	652.209	0	0	0	0	1	0	0	1521500
chr1	602500	603000	chr1	2164000	2164500	3	8.22289	0.006058	495.213	1	0	0	1	0	0	0	1561500
chr1	607000	607500	chr1	2176500	2177000	6	27.1772	0.006026	995.685	1	0	0	0	0	0	0	1569500
chr1	555500	556000	chr1	2187500	2188000	3	8.29425	0.0059	508.475	1	0	0	1	1	1	0	1632000
chr1	910000	910500	chr1	2190000	2190500	3	7.62023	0.007569	396.354	1	0	0	0	0	0	0	1280000
chr1	559500	560000	chr1	2191000	2191500	3	8.39914	0.005675	528.634	1	0	0	0	0	0	0	1631500
chr1	932000	932500	chr1	2212000	2212500	3	7.72184	0.007293	411.353	0	0	0	0	1	0	0	1280000
chr1	639500	640000	chr1	2213000	2213500	36	230.259	0.005986	6014.03	1	0	0	0	0	0	0	1573500
chr1	899500	900000	chr1	2218000	2218500	4	13.583	0.007157	558.893	1	0	0	0	0	0	0	1318500
chr1	553500	554000	chr1	2220000	2220500	4	14.606	0.005453	733.541	1	0	0	0	0	0	0	1666500
chr1	664500	665000	chr1	2221000	2221500	5	20.7926	0.005753	869.112	1	0	0	1	0	0	0	1556500
chr1	850500	851000	chr1	2222000	2222500	4	13.8107	0.006736	593.824	1	0	0	1	1	1	0	1371500
chr1	771500	772000	chr1	2225000	2225500	4	14.0391	0.00634	630.915	1	0	0	0	0	0	0	1453500
chr1	759500	760000	chr1	2233500	2234000	29	205.735	0.006299	4603.91	1	0	0	0	0	0	0	1474000
chr1	756500	757000	chr1	2234000	2234500	4	13.9742	0.00645	620.155	1	0	0	0	0	0	0	1477500
chr1	595500	596000	chr1	2234500	2235000	4	14.5054	0.005601	714.158	0	0	0	0	1	0	0	1639000
chr1	665000	665500	chr1	2234500	2235000	4	14.3235	0.005879	680.388	1	0	0	0	0	0	0	1569500
chr1	732000	732500	chr1	2234500	2235000	4	14.1845	0.0061	655.738	0	0	0	1	1	0	1	1502500
chr1	805500	806000	chr1	2234500	2235000	4	13.9546	0.006484	616.903	1	0	0	0	0	0	0	1429000
chr1	639000	639500	chr1	2242500	2243000	4	14.5163	0.005585	716.204	1	0	0	0	0	0	0	1603500
chr1	790000	790500	chr1	2273000	2273500	3	8.23707	0.006026	497.843	0	0	0	0	1	0	0	1483000
chr1	607000	607500	chr1	2283000	2283500	3	8.48339	0.005501	545.355	1	0	0	0	0	0	0	1676000
chr1	984000	984500	chr1	2317000	2317500	6	26.5765	0.006682	897.935	1	0	0	0	0	0	0	1333000
chr1	771500	772000	chr1	2341500	2342000	4	14.276	0.005954	671.817	0	0	0	1	0	0	0	1570000
chr1	639000	639500	chr1	2345500	2346000	3	8.53075	0.005405	555.042	1	0	0	0	1	0	0	1706500
chr1	746500	747000	chr1	2356500	2357000	6	27.6448	0.005559	1079.33	1	0	0	0	0	0	0	1610000
chr1	835000	835500	chr1	2356500	2357000	3	8.30684	0.005872	510.899	1	0	0	0	0	0	0	1521500
chr1	676500	677000	chr1	2383000	2383500	3	8.49397	0.005479	547.545	1	0	0	0	0	0	0	1706500
chr1	850500	851000	chr1	2391000	2391500	4	14.241	0.006009	665.668	0	0	0	0	1	1	0	1540500
chr1	652500	653000	chr1	2397500	2398000	3	8.5919	0.005283	567.859	1	0	0	1	0	0	0	1745000
chr1	673500	674000	chr1	2398000	2398500	3	8.56304	0.00534	561.798	1	0	0	0	0	0	0	1724500
chr1	555500	556000	chr1	2402000	2402500	3	8.71485	0.005046	594.53	1	0	0	1	0	0	0	1846500
chr1	554500	555000	chr1	2410000	2410500	6	28.0395	0.005192	1155.62	0	1	0	1	0	0	0	1855500
chr1	508000	508500	chr1	2424000	2424500	4	14.9492	0.004973	804.343	0	0	0	1	0	0	0	1916000
chr1	971500	972000	chr1	2424000	2424500	6	26.7125	0.006528	919.118	0	0	0	1	0	0	0	1452500
chr1	910500	911000	chr1	2429500	2430000	6	27.211	0.005991	1001.5	1	0	0	0	0	0	0	1519000
chr1	790000	790500	chr1	2432500	2433000	5	21.0408	0.005463	915.248	0	0	0	0	1	0	0	1642500
chr1	877000	877500	chr1	2433500	2434000	7	34.1215	0.005909	1184.63	1	0	0	0	0	0	0	1556500
chr1	556000	556500	chr1	2441500	2442000	4	14.8498	0.005108	783.085	1	0	0	1	0	0	0	1885500
chr1	553500	554000	chr1	2444000	2444500	4	14.9878	0.004922	812.678	1	0	0	1	0	0	0	1890500
chr1	607000	607500	chr1	2461000	2461500	3	8.69269	0.005088	589.623	0	0	0	1	0	0	0	1854000
chr1	645000	645500	chr1	2462500	2463000	3	8.74919	0.004981	602.289	0	0	0	1	0	0	0	1817500
chr1	778500	779000	chr1	2469500	2470000	4	14.6157	0.005439	735.429	0	0	0	1	0	0	0	1691000
chr1	864500	865000	chr1	2469500	2470000	6	27.3376	0.005861	1023.72	0	0	0	1	0	0	0	1605000
chr1	619500	620000	chr1	2473500	2474000	3	8.74025	0.004998	600.24	1	0	0	0	0	0	0	1854000
chr1	785000	785500	chr1	2473500	2474000	24	168.31	0.005311	4518.92	1	0	0	0	0	0	0	1688500
chr1	771500	772000	chr1	2484000	2484500	7	34.9682	0.005215	1342.28	1	0	0	0	0	0	0	1712500
chr1	881500	882000	chr1	2484500	2485000	4	14.365	0.005815	687.876	1	0	0	0	0	0	0	1603000
chr1	639000	639500	chr1	2488500	2489000	5	21.4245	0.005041	991.867	1	0	0	0	0	0	0	1849500
chr1	899500	900000	chr1	2489000	2489500	3	8.41537	0.005641	531.821	1	0	0	0	0	0	0	1589500
chr1	824000	824500	chr1	2494000	2494500	3	8.45722	0.005554	540.151	1	0	0	0	0	0	0	1670000
chr1	1162000	1162500	chr1	2003000	2003500	4	12.3189	0.01	400	0	0	0	1	0	0	0	841000
chr1	1004000	1004500	chr1	2003500	2004000	4	12.5873	0.009315	429.415	1	0	0	1	0	0	0	999500
chr1	1309000	1309500	chr1	2013500	2014000	5	17.4292	0.011629	429.96	0	0	0	1	0	0	0	704500
chr1	1084000	1084500	chr1	2014500	2015000	3	6.98483	0.009546	314.268	0	0	0	1	0	0	0	930500
chr1	1420000	1420500	chr1	2053000	2053500	5	17.16	0.012312	406.108	1	0	0	0	0	0	0	633000
chr1	1019000	1019500	chr1	2054000	2054500	3	7.25854	0.008637	347.343	1	0	0	0	0	0	0	1035000
chr1	1295000	1295500	chr1	2055000	2055500	12	63.0275	0.011075	1083.52	1	0	0	0	0	0	0	760000
chr1	1049500	1050000	chr1	2067500	2068000	4	12.6619	0.009134	437.924	1	0	0	1	0	0	0	1018000
chr1	1359000	1359500	chr1	2067500	2068000	4	11.7051	0.011775	339.703	1	0	0	0	0	0	0	708500
chr1	1024000	1024500	chr1	2076500	2077000	73	230.259	0.008376	8715.38	0	0	0	0	1	0	0	1052500
chr1	1064000	1064500	chr1	2103500	2104000	7	31.7268	0.008401	833.234	1	0	0	0	0	0	0	1039500
chr1	1112500	1113000	chr1	2103500	2104000	5	18.6366	0.009022	554.201	1	0	0	0	0	0	0	991000
chr1	1411500	1412000	chr1	2103500	2104000	5	17.379	0.011754	425.387	1	0	0	0	0	0	0	692000
chr1	1309000	1309500	chr1	2105000	2105500	5	17.8038	0.010738	465.636	1	0	0	0	1	0	0	796000
chr1	1333500	1334000	chr1	2121500	2122000	4	12.0323	0.010788	370.782	1	0	0	0	0	0	0	788000
chr1	1019500	1020000	chr1	2125500	2126000	6	25.354	0.008244	727.802	1	0	0	0	0	0	0	1106000
chr1	1085000	1085500	chr1	2126000	2126500	3	7.31666	0.008456	354.778	1	0	0	0	0	0	0	1041000
chr1	1084000	1084500	chr1	2134000	2134500	3	7.24033	0.008695	345.026	0	0	0	1	0	0	0	1050000
chr1	1218000	1218500	chr1	2144500	2145000	4	12.6089	0.009262	431.872	0	0	0	1	0	0	0	926500
chr1	1124500	1125000	chr1	2176500	2177000	3	7.01065	0.009456	317.259	1	0	0	0	0	0	0	1052000
chr1	1308000	1308500	chr1	2177000	2177500	8	36.9954	0.010036	797.13	1	0	0	0	0	0	0	869000
chr1	1025000	1025500	chr1	2189500	2190000	3	7.60865	0.007601	394.685	1	0	0	0	0	0	0	1164500
chr1	1158500	1159000	chr1	2191000	2191500	3	7.20177	0.008818	340.213	1	0	0	1	0	0	0	1032500
chr1	1191000	1191500	chr1	2191000	2191500	3	7.17283	0.008912	336.625	1	0	0	0	0	0	0	1000000
chr1	1019500	1020000	chr1	2194500	2195000	6	25.7143	0.007749	774.293	1	0	0	1	1	0	1	1175000
chr1	1085000	1085500	chr1	2198500	2199000	3	7.4192	0.008145	368.324	1	0	0	0	0	0	0	1113500
chr1	1019500	1020000	chr1	2203500	2204000	6	25.7521	0.007699	779.322	1	0	0	1	0	0	0	1184000
chr1	1295500	1296000	chr1	2211000	2211500	3	6.9669	0.009608	312.24	0	0	0	0	1	0	0	915500
chr1	1163500	1164000	chr1	2212000	2212500	3	7.19931	0.008826	339.905	0	0	0	0	1	0	0	1048500
chr1	1030500	1031000	chr1	2227000	2227500	9	45.9201	0.007719	1165.95	0	0	0	1	1	0	1	1196500
chr1	1125500	1126000	chr1	2234500	2235000	4	13.0356	0.008274	483.442	0	0	0	1	0	0	0	1109000
chr1	1332000	1332500	chr1	2234500	2235000	6	24.3668	0.009784	613.246	1	0	0	0	0	0	0	902500
chr1	1335000	1335500	chr1	2234500	2235000	7	30.8814	0.009513	735.835	1	0	0	0	0	0	0	899500
chr1	1444000	1444500	chr1	2234500	2235000	5	17.8562	0.01062	470.81	1	0	0	0	0	0	0	790500
chr1	1085500	1086000	chr1	2251500	2252000	8	39.1408	0.007617	1050.28	0	0	0	0	1	0	0	1166000
chr1	1004000	1004500	chr1	2257500	2258000	3	7.6279	0.007548	397.456	0	0	0	0	1	0	0	1253500
chr1	1374500	1375000	chr1	2269500	2270000	3	6.99169	0.009522	315.06	1	0	0	0	0	0	0	895000
chr1	1431000	1431500	chr1	2269500	2270000	8	37.0184	0.010006	799.52	1	0	0	0	0	0	0	838500
chr1	1157500	1158000	chr1	2288500	2289000	3	7.19355	0.008845	339.175	1	0	0	1	0	0	0	1131000
chr1	1309000	1309500	chr1	2300000	2300500	6	24.7804	0.009104	659.051	1	0	0	0	0	0	0	991000
chr1	1019500	1020000	chr1	2313500	2314000	8	39.6818	0.007106	1125.81	1	0	0	0	0	0	0	1294000
chr1	1250000	1250500	chr1	2317000	2317500	3	7.31766	0.008453	354.904	1	0	0	0	0	0	0	1067000
chr1	1409000	1409500	chr1	2317000	2317500	5	18.247	0.009787	510.882	1	0	0	0	0	0	0	908000
chr1	1465000	1465500	chr1	2322000	2322500	4	12.2093	0.010294	388.576	0	0	0	0	1	1	0	857000
chr1	1052000	1052500	chr1	2334000	2334500	3	7.70269	0.007344	408.497	1	0	0	0	0	0	0	1282000
chr1	1039000	1039500	chr1	2345000	2345500	3	7.78297	0.007131	420.698	1	0	0	0	1	0	0	1306000
chr1	1004000	1004500	chr1	2367000	2367500	3	7.88363	0.00687	436.681	1	0	0	0	0	0	0	1363000
chr1	1430000	1430500	chr1	2375500	2376000	4	12.4714	0.009605	416.45	1	0	0	1	0	0	0	945500
chr1	1024500	1025000	chr1	2377000	2377500	16	99.1726	0.006734	2376	1	0	0	0	0	0	0	1352500
chr1	1409500	1410000	chr1	2397500	2398000	5	18.7553	0.008802	568.053	1	0	0	0	0	0	0	988000
chr1	1458500	1459000	chr1	2397500	2398000	3	7.00393	0.00948	316.456	1	0	0	0	0	0	0	939000
chr1	1290000	1290500	chr1	2398000	2398500	4	12.9542	0.008454	473.149	1	0	0	0	0	0	0	1108000
chr1	1343500	1344000	chr1	2407000	2407500	3	7.15153	0.008982	334.001	1	0	0	1	0	0	0	1063500
chr1	1308000	1308500	chr1	2407500	2408000	9	45.0921	0.008479	1061.45	1	0	0	0	0	0	0	1099500
chr1	1420000	1420500	chr1	2410000	2410500	12	64.896	0.009453	1269.44	1	0	0	1	0	0	0	990000
chr1	1157500	1158000	chr1	2412000	2412500	3	7.33629	0.008396	357.313	1	0	0	1	0	0	0	1254500
chr1	1213000	1213500	chr1	2424000	2424500	3	7.62461	0.007557	396.983	0	0	0	0	0	1	0	1211000
chr1	1038500	1039000	chr1	2432500	2433000	4	13.9878	0.006426	622.471	1	0	0	0	0	0	0	1394000
chr1	1262500	1263000	chr1	2432500	2433000	3	7.49631	0.007919	378.836	1	0	0	0	0	0	0	1170000
chr1	1492000	1492500	chr1	2432500	2433000	13	72.4035	0.009166	1418.28	1	0	0	0	0	0	0	940500
chr1	1190000	1190500	chr1	2433000	2433500	26	176.608	0.007391	3517.79	1	0	0	0	0	0	0	1243000
chr1	1458000	1458500	chr1	2433500	2434000	5	18.5032	0.009277	538.967	1	0	0	0	0	0	0	975500
chr1	1035000	1035500	chr1	2439000	2439500	4	13.9125	0.006556	610.128	0	0	0	1	0	0	0	1404000
chr1	1044500	1045000	chr1	2439000	2439500	5	20.1412	0.006592	758.495	0	0	0	1	0	0	0	1394500
chr1	1290000	1290500	chr1	2439000	2439500	8	38.5729	0.008193	976.443	0	0	0	1	0	0	0	1149000
chr1	1479500	1480000	chr1	2441000	2441500	4	12.5919	0.009304	429.923	0	1	0	1	0	0	0	961500
chr1	1003000	1003500	chr1	2442000	2442500	3	8.07558	0.0064	468.75	1	0	0	0	0	0	0	1439000
chr1	1192000	1192500	chr1	2442000	2442500	3	7.68609	0.007389	406.009	1	0	0	0	0	0	0	1250000
chr1	1464500	1465000	chr1	2445000	2445500	3	7.12985	0.009054	331.345	0	0	0	0	1	0	0	980500
chr1	1023500	1024000	chr1	2456500	2457000	3	8.00851	0.006561	457.247	1	0	0	0	1	0	0	1433000
chr1	1085000	1085500	chr1	2461000	2461500	3	7.91119	0.006801	441.112	0	0	0	1	0	0	0	1376000
chr1	1295500	1296000	chr1	2462500	2463000	7	32.3709	0.007641	916.11	0	0	0	1	0	0	0	1167000
chr1	1431000	1431500	chr1	2468500	2469000	3	7.31659	0.008456	354.778	1	0	0	1	0	0	0	1037500
chr1	1343500	1344000	chr1	2469500	2470000	6	25.4014	0.008178	733.676	0	0	0	1	0	0	0	1126000
chr1	1412000	1412500	chr1	2469500	2470000	3	7.2635	0.008622	347.947	0	0	0	1	0	0	0	1057500
chr1	1436500	1437000	chr1	2469500	2470000	3	7.2308	0.008725	343.84	0	0	0	0	0	1	0	1033000
chr1	1480000	1480500	chr1	2469500	2470000	4	12.6339	0.009201	434.735	0	1	0	0	0	0	0	989500
chr1	1135000	1135500	chr1	2474000	2474500	4	13.8322	0.006698	597.193	1	0	0	1	0	0	0	1339000
chr1	1380000	1380500	chr1	2475500	2476000	3	7.32906	0.008418	356.379	1	0	0	0	0	0	0	1095500
chr1	1196500	1197000	chr1	2484500	2485000	3	7.84639	0.006965	430.725	1	0	0	0	0	0	0	1288000
chr1	1363500	1364000	chr1	2484500	2485000	3	7.43799	0.008089	370.874	1	0	0	0	0	0	0	1121000
chr1	1463500	1464000	chr1	2484500	2485000	8	38.1447	0.008656	924.214	1	0	0	0	1	0	0	1021000
chr1	1369500	1370000	chr1	2494000	2494500	3	7.40666	0.008183	366.614	1	0	0	0	0	0	0	1124500
chr1	1410000	1410500	chr1	2494000	2494500	3	7.31637	0.008457	354.736	1	0	0	0	0	0	0	1084000
chr1	1899500	1900000	chr1	2000500	2001000	6	12.0997	0.08597	69.7918	0	0	0	1	0	0	0	101000
chr1	1971000	1971500	chr1	2003500	2004000	12	20.8272	0.426056	28.1653	1	0	0	1	0	0	0	32500
chr1	1616000	1616500	chr1	2004000	2004500	7	26.5579	0.018121	386.292	0	0	0	1	0	0	0	388000
chr1	1771000	1771500	chr1	2004500	2005000	7	23.3907	0.028992	241.446	0	0	0	1	0	0	0	233500
chr1	1697000	1697500	chr1	2007500	2008000	4	9.24742	0.022952	174.277	1	0	0	0	0	0	0	310500
chr1	1639000	1639500	chr1	2012000	2012500	4	9.99554	0.018614	214.892	1	0	0	0	1	0	0	373000
chr1	1899500	1900000	chr1	2012000	2012500	8	22.8858	0.062777	127.435	0	0	0	1	0	1	0	112500
chr1	1709000	1709500	chr1	2015000	2015500	5	14.3413	0.022637	220.877	1	0	0	0	0	0	0	306000
chr1	1860000	1860500	chr1	2025000	2025500	8	25.9283	0.042186	189.636	0	0	0	1	0	0	0	165000
chr1	1705500	1706000	chr1	2041000	2041500	4	9.71437	0.020083	199.173	1	0	0	0	0	0	0	335500
chr1	1771000	1771500	chr1	2041000	2041500	10	41.6154	0.024631	405.992	0	0	0	1	0	0	0	270000
chr1	1987500	1988000	chr1	2056500	2057000	6	10.0556	0.124372	48.2424	1	0	0	0	0	0	0	69000
chr1	1678000	1678500	chr1	2072000	2072500	5	15.6074	0.017169	291.223	1	0	0	0	0	0	0	394000
chr1	1725000	1725500	chr1	2078500	2079000	20	110.063	0.018925	1056.8	1	0	0	0	0	0	0	353500
chr1	1881000	1881500	chr1	2089000	2089500	5	12.8162	0.031316	159.663	1	0	0	0	0	0	0	208000
chr1	1899500	1900000	chr1	2091000	2091500	6	17.2183	0.034294	174.958	0	1	0	0	0	1	0	191500
chr1	1705000	1705500	chr1	2091500	2092000	5	15.454	0.017777	281.262	0	0	0	1	0	0	0	386500
chr1	1565500	1566000	chr1	2103500	2104000	4	11.2044	0.013469	296.978	1	0	0	0	0	0	0	538000
chr1	1891500	1892000	chr1	2103500	2104000	4	8.18921	0.031155	128.39	0	0	0	1	0	0	0	212000
chr1	1992500	1993000	chr1	2103500	2104000	5	9.54274	0.06333	78.9515	1	0	0	0	1	0	0	111000
chr1	1970500	1971000	chr1	2105000	2105500	14	55.5205	0.052912	264.59	1	0	0	0	1	0	0	134500
chr1	1840000	1840500	chr1	2107500	2108000	23	123.868	0.025915	887.517	1	0	0	1	0	0	0	267500
chr1	1899500	1900000	chr1	2115000	2115500	7	22.9175	0.03113	224.863	0	0	0	1	0	0	0	215500
chr1	1725000	1725500	chr1	2115500	2116000	6	20.9685	0.017801	337.06	1	0	0	0	0	0	0	390500
chr1	1522000	1522500	chr1	2121000	2121500	7	29.1096	0.012396	564.698	1	0	0	0	0	0	0	599000
chr1	1874500	1875000	chr1	2121000	2121500	6	18.4214	0.027745	216.255	1	0	0	0	0	0	0	246500
chr1	1752500	1753000	chr1	2121500	2122000	5	15.157	0.018993	263.255	1	0	0	0	0	0	0	369000
chr1	1771000	1771500	chr1	2126500	2127000	5	14.9945	0.019677	254.104	0	0	0	1	0	0	0	355500
chr1	1676500	1677000	chr1	2127500	2128000	4	10.7639	0.015139	264.218	1	0	0	0	0	0	0	451000
chr1	1697000	1697500	chr1	2128000	2128500	5	15.7384	0.016669	299.958	1	0	0	0	0	0	0	431000
chr1	1860000	1860500	chr1	2128500	2129000	6	18.9317	0.025385	236.36	0	0	0	1	0	0	0	268500
chr1	1705000	1705500	chr1	2151000	2151500	4	10.6374	0.015667	255.314	1	0	0	0	1	0	0	446000
chr1	1881000	1881500	chr1	2151000	2151500	6	18.9742	0.025199	238.105	1	0	0	0	1	0	0	270000
chr1	1705000	1705500	chr1	2151500	2152000	5	16.0305	0.015636	319.775	1	0	0	0	1	0	0	446500
chr1	1970500	1971000	chr1	2151500	2152000	14	60.4394	0.036935	379.044	1	0	0	0	1	0	0	181000
chr1	1841500	1842000	chr1	2164500	2165000	5	14.4922	0.021919	228.113	1	0	0	0	0	0	0	323000
chr1	1975500	1976000	chr1	2167000	2167500	5	12.3261	0.034749	143.889	1	0	0	1	0	0	0	191500
chr1	1822000	1822500	chr1	2187500	2188000	4	9.75931	0.01984	201.613	1	0	0	0	1	0	0	365500
chr1	1705500	1706000	chr1	2189500	2190000	4	10.9887	0.014265	280.407	1	0	0	0	0	0	0	484000
chr1	1976500	1977000	chr1	2191000	2191500	5	12.7881	0.031504	158.71	1	0	0	0	0	0	0	214500
chr1	1713500	1714000	chr1	2192000	2192500	10	46.6005	0.014755	677.736	1	0	0	0	0	0	0	478500
chr1	1709000	1709500	chr1	2198000	2198500	7	27.9979	0.014642	478.077	1	0	0	0	0	0	0	489000
chr1	1987500	1988000	chr1	2200500	2201000	6	17.6994	0.031483	190.579	1	0	0	0	0	0	0	213000
chr1	1941000	1941500	chr1	2202500	2203000	5	13.6458	0.026252	190.462	1	0	0	0	0	0	0	261500
chr1	1623500	1624000	chr1	2204000	2204500	4	11.3805	0.012849	311.308	0	0	0	1	0	0	0	580500
chr1	1899500	1900000	chr1	2211000	2211500	7	25.2617	0.02194	319.052	0	0	0	0	0	1	0	311500
chr1	1970500	1971000	chr1	2217500	2218000	14	64.2784	0.027937	501.128	1	0	0	0	0	0	0	247000
chr1	1822000	1822500	chr1	2218000	2218500	4	10.0941	0.018127	220.665	1	0	0	0	0	0	0	396000
chr1	1941000	1941500	chr1	2218000	2218500	7	24.245	0.025527	274.219	1	0	0	0	0	0	0	277000
chr1	1705000	1705500	chr1	2222500	2223000	5	16.6028	0.013847	361.089	1	0	0	0	1	0	0	517500
chr1	1987500	1988000	chr1	2223000	2223500	7	23.4231	0.028851	242.626	1	0	0	0	0	0	0	235500
chr1	1771000	1771500	chr1	2228000	2228500	4	10.6924	0.015436	259.134	0	0	0	0	0	1	0	457000
chr1	1841500	1842000	chr1	2233500	2234000	4	10.1314	0.017947	222.878	1	0	0	0	0	0	0	392000
chr1	1721500	1722000	chr1	2234500	2235000	7	28.1359	0.014345	487.975	0	0	0	1	0	0	0	513000
chr1	1769500	1770000	chr1	2245500	2246000	4	10.7726	0.015104	264.831	1	0	0	0	0	0	0	476000
chr1	1638500	1639000	chr1	2259500	2260000	17	96.3387	0.012642	1344.72	0	0	0	1	0	0	0	621000
chr1	1771000	1771500	chr1	2283500	2284000	6	22.3099	0.014041	427.32	0	0	0	1	0	0	0	512500
chr1	1822000	1822500	chr1	2293500	2294000	4	10.9002	0.014602	273.935	1	0	0	0	0	0	0	471500
chr1	1771000	1771500	chr1	2306500	2307000	7	28.3106	0.013978	500.787	0	0	0	1	0	0	0	535500
chr1	1714000	1714500	chr1	2313000	2313500	16	89.1439	0.012705	1259.35	1	0	0	0	0	0	0	599000
chr1	1975500	1976000	chr1	2315000	2315500	4	9.63322	0.020534	194.799	0	0	0	0	1	0	0	339500
chr1	1616000	1616500	chr1	2316000	2316500	5	17.4991	0.011456	436.453	0	0	0	0	0	1	0	700000
chr1	1941000	1941500	chr1	2319500	2320000	7	26.5648	0.018102	386.698	1	0	0	0	0	0	0	378500
chr1	1881000	1881500	chr1	2334500	2335000	7	27.4959	0.015775	443.74	1	0	0	0	0	0	0	453500
chr1	1970500	1971000	chr1	2340000	2340500	20	110.003	0.018983	1053.57	1	0	0	0	0	0	0	369500
chr1	1705000	1705500	chr1	2341500	2342000	5	17.0987	0.012472	400.898	0	0	0	1	0	0	0	636500
chr1	1899500	1900000	chr1	2349500	2350000	6	21.7611	0.015494	387.247	0	0	0	1	0	1	0	450000
chr1	1573500	1574000	chr1	2356500	2357000	4	11.9497	0.011029	362.68	1	0	0	0	0	0	0	783000
chr1	1677000	1677500	chr1	2356500	2357000	5	17.3215	0.011899	420.203	1	0	0	0	0	0	0	679500
chr1	1900000	1900500	chr1	2356500	2357000	5	15.9808	0.015805	316.356	0	0	0	1	0	0	0	456500
chr1	1860500	1861000	chr1	2367000	2367500	8	34.2378	0.014351	557.452	1	0	0	1	0	0	0	506500
chr1	1860500	1861000	chr1	2367500	2368000	6	22.2936	0.014082	426.076	1	0	0	1	0	0	0	507000
chr1	1881000	1881500	chr1	2392500	2393000	7	28.287	0.014027	499.038	0	0	0	1	0	0	0	511500
chr1	1725000	1725500	chr1	2393500	2394000	7	29.3833	0.011889	588.78	1	0	0	1	0	0	0	668500
chr1	1771000	1771500	chr1	2402000	2402500	5	17.1371	0.012372	404.138	0	0	0	1	0	0	0	631000
chr1	1705000	1705500	chr1	2406500	2407000	6	23.3748	0.011621	516.307	1	0	0	1	0	0	0	701500
chr1	1763500	1764000	chr1	2406500	2407000	4	11.5639	0.012231	327.038	1	0	0	1	0	0	0	643000
chr1	1971000	1971500	chr1	2421500	2422000	6	21.6986	0.015667	382.971	1	0	0	0	0	0	0	450500
chr1	1987500	1988000	chr1	2421500	2422000	4	10.5146	0.016199	246.929	1	0	0	0	0	0	0	434000
chr1	1988000	1988500	chr1	2423500	2424000	4	10.6354	0.015676	255.167	1	0	0	1	0	0	0	435500
chr1	1971000	1971500	chr1	2430500	2431000	7	27.693	0.015321	456.889	1	0	0	0	0	0	0	459500
chr1	1820000	1820500	chr1	2432500	2433000	4	11.5698	0.012212	327.547	0	0	0	1	0	0	0	612500
chr1	1882000	1882500	chr1	2432500	2433000	9	41.3111	0.013066	688.811	1	0	0	0	0	0	0	550500
chr1	1539500	1540000	chr1	2433500	2434000	3	6.92361	0.009761	307.346	1	0	0	0	0	0	0	894000
chr1	1817000	1817500	chr1	2433500	2434000	4	11.4817	0.012505	319.872	1	0	0	0	0	0	0	616500
chr1	1936500	1937000	chr1	2433500	2434000	6	22.0033	0.014841	404.285	0	0	0	1	0	0	0	497000
chr1	1511500	1512000	chr1	2439000	2439500	5	18.4326	0.009414	531.124	0	0	0	1	0	0	0	927500
chr1	1680500	1681000	chr1	2439000	2439500	4	11.9591	0.011001	363.603	0	0	0	1	0	0	0	758500
chr1	1528000	1528500	chr1	2441500	2442000	4	12.5531	0.0094	425.532	1	0	0	1	0	0	0	913500
chr1	1598000	1598500	chr1	2462500	2463000	4	12.3792	0.009842	406.421	0	0	0	1	0	0	0	864500
chr1	1968000	1968500	chr1	2469500	2470000	4	10.9354	0.014467	276.491	0	0	0	1	0	0	0	501500
chr1	1525500	1526000	chr1	2484500	2485000	3	7.09335	0.009175	326.975	1	0	0	0	0	0	0	959000
chr1	1549000	1549500	chr1	2484500	2485000	3	6.91041	0.009808	305.873	1	0	0	0	0	0	0	935500
chr1	1705000	1705500	chr1	2494500	2495000	7	29.9419	0.010931	640.381	1	0	0	0	0	0	0	789500
chr1	2003000	2003500	chr1	2067500	2068000	7	13.168	0.138129	50.6773	0	0	0	1	0	0	0	64500
chr1	2081500	2082000	chr1	2103500	2104000	9	7.10031	0.766719	11.7383	1	0	0	0	0	0	0	22000
chr1	2093000	2093500	chr1	2103500	2104000	17	13.3213	2.12874	7.98593	1	0	0	0	0	0	0	10500
chr1	2071500	2072000	chr1	2107500	2108000	43	155.905	0.342147	125.677	1	0	0	1	0	0	0	36000
chr1	2089000	2089500	chr1	2107500	2108000	31	69.0556	0.963877	32.1618	1	0	0	1	0	0	0	18500
chr1	2096000	2096500	chr1	2107500	2108000	19	19.4287	1.87645	10.1255	1	0	0	1	0	0	0	11500
chr1	2105500	2106000	chr1	2107500	2108000	35	9.00252	11.3956	3.07135	0	0	0	0	1	1	0	2000
chr1	2013000	2013500	chr1	2121000	2121500	6	13.4433	0.067693	88.6355	0	0	0	0	1	0	0	108000
chr1	2077000	2077500	chr1	2121000	2121500	9	15.1821	0.275589	32.6573	0	0	0	0	1	0	0	44000
chr1	2115500	2116000	chr1	2121000	2121500	21	8.66089	4.62736	4.53822	1	0	0	0	0	0	0	5500
chr1	2108000	2108500	chr1	2165000	2165500	6	8.45455	0.169534	35.3911	1	0	0	1	0	0	0	57000
chr1	2121500	2122000	chr1	2165000	2165500	8	11.9249	0.274542	29.1394	1	0	0	0	0	0	0	43500
chr1	2121500	2122000	chr1	2165500	2166000	7	8.59143	0.286525	24.4307	1	0	0	0	0	0	0	44000
chr1	2163500	2164000	chr1	2191000	2191500	10	12.6142	0.530875	18.8368	1	0	0	0	0	0	0	27500
chr1	2121500	2122000	chr1	2197000	2197500	5	7.06969	0.111552	44.8221	1	0	0	0	0	0	0	75500
chr1	2121000	2121500	chr1	2211000	2211500	6	11.9857	0.087742	68.3823	0	0	0	0	1	0	0	90000
chr1	2164000	2164500	chr1	2245500	2246000	6	11.3725	0.098036	61.202	1	0	0	0	0	0	0	81500
chr1	2121000	2121500	chr1	2268000	2268500	9	30.3196	0.046081	195.308	1	0	0	0	0	0	0	147000
chr1	2067500	2068000	chr1	2273500	2274000	4	8.04471	0.032446	123.282	1	0	0	0	0	0	0	206000
chr1	2121500	2122000	chr1	2282000	2282500	4	7.02971	0.042954	93.1229	0	0	0	0	1	0	0	160500
chr1	2121000	2121500	chr1	2289500	2290000	4	7.28664	0.040017	99.9575	1	0	0	1	0	0	0	168500
chr1	2121500	2122000	chr1	2293000	2293500	4	7.31656	0.039688	100.786	1	0	0	0	0	0	0	171500
chr1	2269500	2270000	chr1	2317000	2317500	12	28.2794	0.219308	54.7176	1	0	0	0	0	0	0	47500
chr1	2234500	2235000	chr1	2317500	2318000	5	7.70938	0.096751	51.6791	1	0	0	1	0	0	0	83000
chr1	2234500	2235000	chr1	2322000	2322500	5	8.07188	0.089184	56.0639	1	0	0	1	0	0	0	87500
chr1	2191000	2191500	chr1	2339500	2340000	7	20.4677	0.045185	154.919	1	0	0	0	0	0	0	148500
chr1	2144500	2145000	chr1	2340500	2341000	4	8.03767	0.03251	123.039	1	0	0	0	0	0	0	196000
chr1	2317000	2317500	chr1	2356500	2357000	14	32.7939	0.283854	49.3211	1	0	0	0	0	0	0	39500
chr1	2234500	2235000	chr1	2379000	2379500	6	15.2918	0.048568	123.538	1	0	0	0	0	0	0	144500
chr1	2108000	2108500	chr1	2388500	2389000	5	14.0031	0.024326	205.541	1	0	0	1	0	0	0	280500
chr1	2340000	2340500	chr1	2397500	2398000	10	22.9548	0.171728	58.2316	1	0	0	0	0	0	0	57500
chr1	2092500	2093000	chr1	2398000	2398500	4	9.26401	0.022834	175.177	1	0	0	0	0	0	0	305500
chr1	2159000	2159500	chr1	2398000	2398500	4	8.4371	0.029073	137.585	1	0	0	0	0	0	0	239000
chr1	2121000	2121500	chr1	2405000	2405500	4	9.12768	0.023822	167.912	0	0	0	0	1	0	0	284000
chr1	2121000	2121500	chr1	2407000	2407500	8	30.1698	0.024239	330.047	1	0	0	1	0	0	0	286000
chr1	2103500	2104000	chr1	2411000	2411500	8	30.8775	0.022117	361.713	1	0	0	0	0	0	0	307500
chr1	2317000	2317500	chr1	2411000	2411500	6	12.0004	0.08751	68.5636	1	0	0	0	0	0	0	94000
chr1	2409500	2410000	chr1	2412500	2413000	29	8.0183	8.69828	3.33399	0	0	0	1	0	0	0	3000
chr1	2369000	2369500	chr1	2421000	2421500	12	29.5433	0.195892	61.2582	1	0	0	1	0	0	0	52000
chr1	2339500	2340000	chr1	2424000	2424500	7	15.957	0.08932	78.3699	0	0	0	1	0	0	0	84500
chr1	2415000	2415500	chr1	2424000	2424500	15	7.43063	2.54896	5.88474	0	1	0	1	0	0	0	9000
chr1	2195000	2195500	chr1	2432500	2433000	4	8.51039	0.028484	140.43	1	0	0	0	1	0	0	237500
chr1	2245500	2246000	chr1	2432500	2433000	4	7.68894	0.03582	111.669	1	0	0	0	0	0	0	187000
chr1	2276000	2276500	chr1	2433000	2433500	25	124.494	0.04374	571.559	1	0	0	0	0	0	0	157000
chr1	2341500	2342000	chr1	2433000	2433500	28	123.62	0.090003	311.101	0	0	0	1	0	0	0	91500
chr1	2183000	2183500	chr1	2433500	2434000	4	8.69899	0.027014	148.071	1	0	0	0	0	0	0	250500
chr1	2433500	2434000	chr1	2435500	2436000	39	13.4211	11.4076	3.41877	1	0	0	1	0	0	0	2000
chr1	2433000	2433500	chr1	2436000	2436500	70	77.7011	8.509	8.22658	1	0	0	1	0	0	0	3000
chr1	2433500	2434000	chr1	2436000	2436500	34	11.331	9.76105	3.48323	1	0	0	1	0	0	0	2500
chr1	2085500	2086000	chr1	2439000	2439500	5	15.068	0.019367	258.171	0	0	0	1	0	0	0	353500
chr1	2175500	2176000	chr1	2439000	2439500	7	24.3544	0.025116	278.707	0	0	0	1	0	0	0	263500
chr1	2225000	2225500	chr1	2439000	2439500	6	17.7361	0.03128	191.816	0	0	0	1	0	0	0	214000
chr1	2259000	2259500	chr1	2439000	2439500	5	11.987	0.037348	133.876	0	1	0	0	0	0	0	180000
chr1	2262000	2262500	chr1	2439000	2439500	4	7.47293	0.038014	105.224	0	0	0	1	0	0	0	177000
chr1	2293500	2294000	chr1	2439000	2439500	8	25.1769	0.046495	172.062	0	0	0	1	0	0	0	145500
chr1	2300000	2300500	chr1	2439000	2439500	7	19.7314	0.050462	138.718	0	0	0	1	0	0	0	139000
chr1	2316000	2316500	chr1	2439000	2439500	5	9.88346	0.058758	85.0948	0	0	0	0	0	1	0	123000
chr1	2320000	2320500	chr1	2439000	2439500	5	9.69823	0.061181	81.7247	0	0	0	1	0	0	0	119000
chr1	2432500	2433000	chr1	2439000	2439500	22	13.976	3.6709	5.99308	0	0	0	1	0	0	0	6500
chr1	2433500	2434000	chr1	2439000	2439500	32	27.9155	4.4615	7.17248	0	0	0	1	0	0	0	5500
chr1	2121000	2121500	chr1	2441000	2441500	8	31.04	0.021658	369.379	1	0	0	1	0	0	0	320000
chr1	2356500	2357000	chr1	2441500	2442000	10	29.2751	0.088387	113.139	1	0	0	1	0	0	0	85000
chr1	2031000	2031500	chr1	2442000	2442500	9	38.8188	0.017359	518.463	1	0	0	0	0	0	0	411000
chr1	2157500	2158000	chr1	2442000	2442500	4	9.12923	0.02381	167.997	1	0	0	0	0	0	0	284500
chr1	2433000	2433500	chr1	2444500	2445000	28	41.3556	1.88924	14.8208	1	0	0	0	0	0	0	11500
chr1	2424000	2424500	chr1	2445500	2446000	9	6.98407	0.778536	11.5602	0	1	0	1	0	0	0	21500
chr1	2456000	2456500	chr1	2460000	2460500	32	17.6484	6.66441	4.80162	0	0	0	0	0	1	0	4000
chr1	2153000	2153500	chr1	2462500	2463000	4	9.32382	0.02242	178.412	0	1	0	1	0	0	0	309500
chr1	2455000	2455500	chr1	2463000	2463500	16	7.03721	3.02079	5.29662	0	1	0	0	0	0	0	8000
chr1	2457000	2457500	chr1	2465000	2465500	18	9.99053	3.06551	5.87178	0	0	0	1	0	0	0	8000
chr1	2093500	2094000	chr1	2469500	2470000	10	44.7488	0.01783	560.852	0	0	0	1	0	0	0	376000
chr1	2187500	2188000	chr1	2469500	2470000	5	13.8007	0.025399	196.858	0	0	0	1	0	1	0	282000
chr1	2224000	2224500	chr1	2469500	2470000	4	8.49989	0.028568	140.017	0	0	0	1	0	1	0	245500
chr1	2457500	2458000	chr1	2469500	2470000	14	9.75293	1.76652	7.92516	0	0	0	1	0	0	0	12000
chr1	2432500	2433000	chr1	2473500	2474000	7	8.88235	0.272914	25.6491	1	0	0	0	0	0	0	41000
chr1	2248500	2249000	chr1	2484500	2485000	4	8.35794	0.029721	134.585	1	0	0	0	1	0	0	236000
chr1	2469500	2470000	chr1	2484500	2485000	14	13.6806	1.26811	11.0401	0	0	0	1	0	0	0	15000
chr1	2433500	2434000	chr1	2487000	2487500	7	11.3144	0.184004	38.0427	1	0	0	0	0	0	0	53500
chr1	2121500	2122000	chr1	2488500	2489000	5	15.178	0.018906	264.466	1	0	0	0	0	0	0	367000
chr1	2093000	2093500	chr1	2494000	2494500	5	15.4747	0.017694	282.582	1	0	0	0	0	0	0	401000
chr1	2159000	2159500	chr1	2494000	2494500	6	19.9618	0.021217	282.792	1	0	0	0	0	0	0	335000
chr1	2439000	2439500	chr1	2495500	2496000	6	8.47997	0.16872	35.5619	0	1	0	0	0	0	0	56500
chr1	414000	414500	chr1	2519500	2520000	21	146.521	0.004574	4591.17	1	0	0	0	0	0	0	2105500
chr1	104000	104500	chr1	2528500	2529000	4	15.6064	0.004146	964.785	0	0	0	0	0	1	0	2424500
chr1	499500	500000	chr1	2538500	2539000	10	57.767	0.004715	2120.89	1	0	0	0	0	0	0	2039000
chr1	151000	151500	chr1	2560500	2561000	4	15.5287	0.004238	943.841	1	0	0	0	0	0	0	2409500
chr1	265000	265500	chr1	2560500	2561000	3	9.13888	0.004275	701.754	1	0	0	0	0	0	0	2295500
chr1	447500	448000	chr1	2561000	2561500	3	8.93875	0.004633	647.529	1	0	0	0	0	0	0	2113500
chr1	195500	196000	chr1	2565500	2566000	3	9.11291	0.004322	694.123	0	0	0	0	1	1	0	2370000
chr1	229000	229500	chr1	2588000	2588500	6	29.3075	0.004157	1443.35	1	0	0	0	0	0	0	2359000
chr1	309500	310000	chr1	2613500	2614000	3	9.08297	0.004375	685.714	1	0	0	0	0	0	0	2304000
chr1	394000	394500	chr1	2614000	2614500	5	22.2323	0.004245	1177.86	1	0	0	0	0	0	0	2220000
chr1	394500	395000	chr1	2614000	2614500	4	15.2078	0.004636	862.813	1	0	0	0	0	0	0	2219500
chr1	408000	408500	chr1	2614500	2615000	11	66.1454	0.004396	2502.27	1	0	0	0	0	0	0	2206500
chr1	116000	116500	chr1	2617000	2617500	3	9.21148	0.004149	723.066	1	0	0	0	0	0	0	2501000
chr1	136500	137000	chr1	2617000	2617500	4	15.5665	0.004193	953.971	1	0	0	0	0	0	0	2480500
chr1	464000	464500	chr1	2617000	2617500	3	8.99152	0.004538	661.084	1	0	0	0	0	0	0	2153000
chr1	461500	462000	chr1	2618000	2618500	4	15.2808	0.004544	880.282	1	0	0	0	0	0	0	2156500
chr1	475000	475500	chr1	2618000	2618500	3	8.99789	0.004527	662.691	1	0	0	0	0	0	0	2143000
chr1	2000	2500	chr1	2622000	2622500	4	15.7033	0.004034	991.572	1	0	0	0	0	0	0	2620000
chr1	407000	407500	chr1	2636500	2637000	4	15.3751	0.004426	903.751	1	0	0	0	0	0	0	2229500
chr1	60000	60500	chr1	2644500	2645000	3	9.25236	0.00408	735.294	1	0	0	1	0	0	0	2584500
chr1	85000	85500	chr1	2647000	2647500	6	29.2161	0.004226	1419.78	1	0	0	0	0	0	0	2562000
chr1	207500	208000	chr1	2657000	2657500	5	22.3204	0.004164	1200.77	1	0	0	0	0	0	0	2449500
chr1	156500	157000	chr1	2687500	2688000	5	22.3333	0.004152	1204.24	1	0	0	0	0	0	0	2531000
chr1	408000	408500	chr1	2687500	2688000	4	15.4664	0.004314	927.214	1	0	0	0	0	0	0	2279500
chr1	356000	356500	chr1	2694500	2695000	3	9.16067	0.004237	708.048	1	0	0	0	1	0	0	2338500
chr1	266000	266500	chr1	2699000	2699500	3	9.1823	0.0042	714.286	1	0	0	1	0	0	0	2433000
chr1	224500	225000	chr1	2701500	2702000	6	29.2541	0.004197	1429.59	1	0	0	0	0	0	0	2477000
chr1	224500	225000	chr1	2702000	2702500	5	22.322	0.004162	1201.35	1	0	0	0	0	0	0	2477500
chr1	163500	164000	chr1	2723000	2723500	15	98.4502	0.00421	3562.95	1	0	0	0	0	0	0	2559500
chr1	342500	343000	chr1	2735500	2736000	5	22.3804	0.00411	1216.55	1	0	0	1	0	0	0	2393000
chr1	414500	415000	chr1	2761000	2761500	6	29.1305	0.00429	1398.6	1	0	0	0	0	0	0	2346500
chr1	342500	343000	chr1	2761500	2762000	5	22.325	0.00416	1201.92	1	0	0	1	0	0	0	2419000
chr1	131000	131500	chr1	2763000	2763500	3	9.26947	0.004051	740.558	1	0	0	0	0	0	0	2632000
chr1	407000	407500	chr1	2808000	2808500	3	9.15502	0.004247	706.381	1	0	0	0	0	0	0	2401000
chr1	499500	500000	chr1	2819000	2819500	12	74.0334	0.004359	2752.92	1	0	0	0	0	0	0	2319500
chr1	444000	444500	chr1	2841000	2841500	3	9.23635	0.004107	730.46	1	0	0	0	0	0	0	2397000
chr1	2000	2500	chr1	2848500	2849000	7	36.9218	0.003903	1793.49	1	0	0	0	0	0	0	2846500
chr1	336500	337000	chr1	2850500	2851000	3	9.23348	0.004112	729.572	1	0	0	0	1	0	0	2514000
chr1	187000	187500	chr1	2851500	2852000	5	22.4124	0.004081	1225.19	0	0	0	0	1	0	0	2664500
chr1	273500	274000	chr1	2851500	2852000	5	22.4252	0.00407	1228.5	1	0	0	0	0	0	0	2578000
chr1	359500	360000	chr1	2871500	2872000	3	9.19088	0.004185	716.846	1	0	0	0	0	0	0	2512000
chr1	451000	451500	chr1	2871500	2872000	4	15.5915	0.004163	960.846	1	0	0	0	0	0	0	2420500
chr1	201000	201500	chr1	2872000	2872500	3	9.23232	0.004114	729.217	1	0	0	0	0	0	0	2671000
chr1	453000	453500	chr1	2876000	2876500	3	9.17174	0.004218	711.238	1	0	0	0	0	0	0	2423000
chr1	491500	492000	chr1	2887000	2887500	3	9.10254	0.00434	691.244	1	0	0	0	0	0	0	2395500
chr1	34500	35000	chr1	2899500	2900000	3	9.04518	0.004442	675.371	1	0	0	0	0	0	0	2865000
chr1	414500	415000	chr1	2929000	2929500	7	36.3706	0.004237	1652.11	0	0	0	1	0	0	0	2514500
chr1	344500	345000	chr1	2933000	2933500	4	15.6614	0.004082	979.912	1	0	0	0	0	0	0	2588500
chr1	251000	251500	chr1	2938500	2939000	6	29.6281	0.003929	1527.11	1	0	0	0	0	0	0	2687500
chr1	59500	60000	chr1	2940000	2940500	3	9.42418	0.003811	787.195	1	0	0	1	0	0	0	2880500
chr1	447000	447500	chr1	2940000	2940500	10	59.2984	0.004032	2480.16	1	0	0	0	0	0	0	2493000
chr1	417500	418000	chr1	2957000	2957500	4	15.7106	0.004026	993.542	1	0	0	0	0	0	0	2539500
chr1	251000	251500	chr1	2968000	2968500	3	9.22505	0.004126	727.096	1	0	0	0	0	0	0	2717000
chr1	218000	218500	chr1	2980000	2980500	11	66.8966	0.0041	2682.93	1	0	0	0	0	0	0	2762000
chr1	277000	277500	chr1	2980000	2980500	8	43.9715	0.004096	1953.12	1	0	0	0	0	0	0	2703000
chr1	417500	418000	chr1	2983000	2983500	3	9.26214	0.004063	738.371	1	0	0	0	0	0	0	2565500
chr1	277500	278000	chr1	2989500	2990000	3	9.27549	0.004041	742.39	0	0	0	0	1	0	0	2712000
chr1	204000	204500	chr1	2994500	2995000	4	15.759	0.003972	1007.05	0	0	0	0	1	0	0	2790500
chr1	798500	799000	chr1	2502500	2503000	3	8.59848	0.00527	569.26	1	0	0	0	0	0	0	1704000
chr1	968000	968500	chr1	2560500	2561000	3	8.3157	0.005853	512.558	1	0	0	0	0	0	0	1592500
chr1	983500	984000	chr1	2561000	2561500	3	8.26294	0.005969	502.597	1	0	0	1	0	0	0	1577500
chr1	912000	912500	chr1	2587500	2588000	4	14.6812	0.005345	748.363	1	0	0	0	0	0	0	1675500
chr1	607000	607500	chr1	2613500	2614000	3	8.84919	0.004795	625.652	1	0	0	0	0	0	0	2006500
chr1	625000	625500	chr1	2617000	2617500	3	8.86097	0.004774	628.404	1	0	0	0	0	0	0	1992000
chr1	672000	672500	chr1	2618000	2618500	3	8.82039	0.004848	618.812	1	0	0	0	0	0	0	1946000
chr1	600000	600500	chr1	2620500	2621000	11	65.4856	0.004673	2353.95	0	0	0	0	1	0	0	2020500
chr1	500000	500500	chr1	2633000	2633500	8	43.1632	0.004548	1759.01	0	0	0	1	0	0	0	2133000
chr1	785500	786000	chr1	2637000	2637500	15	96.2281	0.004892	3066.23	1	0	0	0	0	0	0	1851500
chr1	865000	865500	chr1	2637500	2638000	4	14.7578	0.005236	763.942	1	0	0	0	0	0	0	1772500
chr1	600000	600500	chr1	2646500	2647000	44	230.259	0.004512	9751.77	1	0	0	0	0	0	0	2046500
chr1	639000	639500	chr1	2647500	2648000	3	8.8898	0.004721	635.459	1	0	0	0	0	0	0	2008500
chr1	834500	835000	chr1	2687500	2688000	4	14.8621	0.005092	785.546	1	0	0	0	0	0	0	1853000
chr1	846000	846500	chr1	2687500	2688000	3	8.72691	0.005023	597.253	1	0	0	0	0	0	0	1841500
chr1	898000	898500	chr1	2687500	2688000	5	21.2581	0.00522	957.854	1	0	0	0	0	0	0	1789500
chr1	979000	979500	chr1	2694500	2695000	3	8.51252	0.005442	551.268	1	0	0	0	0	0	0	1715500
chr1	534500	535000	chr1	2699000	2699500	3	9.10707	0.004332	692.521	1	0	0	1	0	0	0	2164500
chr1	831000	831500	chr1	2699000	2699500	3	8.75091	0.004978	602.652	0	0	0	0	1	0	0	1868000
chr1	671000	671500	chr1	2711000	2711500	3	8.88829	0.004724	635.055	1	0	0	0	0	0	0	2040000
chr1	768000	768500	chr1	2711500	2712000	3	8.81044	0.004867	616.396	1	0	0	0	0	0	0	1943500
chr1	779000	779500	chr1	2711500	2712000	3	8.83287	0.004825	621.762	1	0	0	0	0	0	0	1932500
chr1	707000	707500	chr1	2722500	2723000	9	50.0103	0.004852	1854.91	1	0	0	0	0	0	0	2015500
chr1	731500	732000	chr1	2722500	2723000	10	57.6727	0.004761	2100.4	0	0	0	1	1	0	1	1991000
chr1	852500	853000	chr1	2723000	2723500	8	42.4358	0.004994	1601.92	0	0	0	0	1	0	0	1870500
chr1	917000	917500	chr1	2723000	2723500	4	14.865	0.005088	786.164	1	0	0	1	0	0	0	1806000
chr1	968000	968500	chr1	2733000	2733500	3	8.56999	0.005327	563.169	0	0	0	1	0	0	0	1765000
chr1	607000	607500	chr1	2737000	2737500	3	9.01358	0.004499	666.815	1	0	0	0	0	0	0	2130000
chr1	786000	786500	chr1	2748000	2748500	3	8.76872	0.004944	606.796	1	0	0	0	0	0	0	1962000
chr1	664500	665000	chr1	2761000	2761500	3	8.95869	0.004597	652.6	1	0	0	0	0	0	0	2096500
chr1	873000	873500	chr1	2762000	2762500	3	8.7059	0.005063	592.534	0	0	0	1	0	0	0	1889000
chr1	673000	673500	chr1	2762500	2763000	9	50.4213	0.00463	1943.84	1	0	0	0	0	0	0	2089500
chr1	746500	747000	chr1	2826000	2826500	3	9.02891	0.004471	670.991	1	0	0	1	0	0	0	2079500
chr1	757000	757500	chr1	2841000	2841500	5	22.0151	0.004449	1123.85	1	0	0	0	0	0	0	2084000
chr1	760000	760500	chr1	2849500	2850000	4	15.3609	0.004444	900.09	1	0	0	0	0	0	0	2089500
chr1	518000	518500	chr1	2851500	2852000	6	29.1135	0.004303	1394.38	0	0	0	1	0	0	0	2333500
chr1	802000	802500	chr1	2872000	2872500	3	8.91545	0.004675	641.711	1	0	0	0	0	0	0	2070000
chr1	848500	849000	chr1	2872000	2872500	3	8.85104	0.004792	626.043	1	0	0	0	0	0	0	2023500
chr1	552500	553000	chr1	2876000	2876500	3	9.14234	0.004269	702.741	1	0	0	0	0	0	0	2323500
chr1	620000	620500	chr1	2876000	2876500	4	15.5499	0.004213	949.442	1	0	0	0	0	0	0	2256000
chr1	687500	688000	chr1	2876000	2876500	7	36.2891	0.004289	1632.08	1	0	0	0	0	0	0	2188500
chr1	881500	882000	chr1	2876000	2876500	5	21.7191	0.004738	1055.3	1	0	0	0	0	0	0	1994500
chr1	699000	699500	chr1	2886500	2887000	4	15.2546	0.004577	873.935	1	0	0	0	0	0	0	2187500
chr1	634000	634500	chr1	2910000	2910500	3	9.18577	0.004194	715.308	1	0	0	0	0	0	0	2276000
chr1	850500	851000	chr1	2926500	2927000	5	21.8167	0.004641	1077.35	1	0	0	1	0	0	0	2076000
chr1	664000	664500	chr1	2930000	2930500	3	9.16806	0.004224	710.227	0	0	0	0	1	0	0	2266000
chr1	847500	848000	chr1	2932000	2932500	3	8.96493	0.004586	654.165	0	0	0	0	1	0	0	2084500
chr1	522000	522500	chr1	2932500	2933000	3	8.98261	0.004554	658.762	1	0	0	1	0	0	0	2410500
chr1	600500	601000	chr1	2937500	2938000	30	225.704	0.004271	7024.12	1	0	0	0	0	0	0	2337000
chr1	799000	799500	chr1	2938000	2938500	3	9.02982	0.00447	671.141	1	0	0	0	0	0	0	2139000
chr1	626500	627000	chr1	2938500	2939000	3	9.0645	0.004408	680.581	1	0	0	0	0	0	0	2312000
chr1	575500	576000	chr1	2965000	2965500	3	9.08856	0.004365	687.285	0	0	0	1	0	0	0	2389500
chr1	768500	769000	chr1	2965000	2965500	3	8.99575	0.004531	662.105	0	0	0	1	0	0	0	2196500
chr1	947500	948000	chr1	2968000	2968500	3	8.84152	0.004809	623.83	0	0	0	1	0	0	0	2020500
chr1	757000	757500	chr1	2973000	2973500	5	22.1994	0.004275	1169.59	1	0	0	0	0	0	0	2216000
chr1	789000	789500	chr1	2979500	2980000	10	58.0695	0.004572	2187.23	1	0	0	0	0	0	0	2190500
chr1	636000	636500	chr1	2980000	2980500	8	43.8729	0.004149	1928.18	1	0	0	0	0	0	0	2344000
chr1	820500	821000	chr1	2980000	2980500	21	147.562	0.004351	4826.48	1	0	0	0	0	0	0	2159500
chr1	865000	865500	chr1	2986000	2986500	3	9.05838	0.004419	678.887	1	0	0	0	0	0	0	2121000
chr1	850500	851000	chr1	2992000	2992500	4	15.3184	0.004497	889.482	1	0	0	1	0	0	0	2141500
chr1	1221500	1222000	chr1	2512000	2512500	3	7.78202	0.007133	420.58	1	0	0	0	0	0	0	1290500
chr1	1380000	1380500	chr1	2518000	2518500	3	7.46859	0.008	375	1	0	0	0	0	0	0	1138000
chr1	1221500	1222000	chr1	2519500	2520000	3	7.81662	0.007043	425.955	1	0	0	0	0	0	0	1298000
chr1	1226000	1226500	chr1	2530000	2530500	3	7.80769	0.007066	424.568	1	0	0	0	0	0	0	1304000
chr1	1308000	1308500	chr1	2539500	2540000	7	32.5356	0.007458	938.589	1	0	0	0	0	0	0	1231500
chr1	1479500	1480000	chr1	2552000	2552500	3	7.3172	0.008454	354.862	0	1	0	1	0	0	0	1072500
chr1	1303000	1303500	chr1	2560500	2561000	3	7.70031	0.007351	408.108	1	0	0	0	0	0	0	1257500
chr1	1226000	1226500	chr1	2563500	2564000	3	7.85421	0.006945	431.965	1	0	0	0	0	0	0	1337500
chr1	1442500	1443000	chr1	2565500	2566000	4	13.0678	0.008204	487.567	1	1	0	1	0	0	0	1123000
chr1	1226000	1226500	chr1	2566000	2566500	3	7.84476	0.00697	430.416	1	0	0	0	0	0	0	1340000
chr1	1430000	1430500	chr1	2578500	2579000	3	7.48196	0.007961	376.837	0	1	0	1	0	0	0	1148500
chr1	1162500	1163000	chr1	2581000	2581500	3	7.96216	0.006674	449.506	1	0	0	1	0	0	0	1418500
chr1	1221500	1222000	chr1	2581500	2582000	3	7.94051	0.006728	445.898	1	0	0	0	0	0	0	1360000
chr1	1085500	1086000	chr1	2587000	2587500	15	92.509	0.006285	2386.63	1	0	0	0	0	0	0	1501500
chr1	1206000	1206500	chr1	2587500	2588000	3	8.05728	0.006443	465.622	1	0	0	0	0	0	0	1381500
chr1	1156000	1156500	chr1	2588000	2588500	9	47.5413	0.006423	1401.21	1	0	0	0	0	0	0	1432000
chr1	1221000	1221500	chr1	2588000	2588500	11	61.3687	0.006836	1609.13	1	0	0	0	0	0	0	1367000
chr1	1244000	1244500	chr1	2588000	2588500	17	107.331	0.00657	2587.52	1	0	0	0	0	0	0	1344000
chr1	1477000	1477500	chr1	2617000	2617500	4	13.127	0.008077	495.233	1	0	0	1	0	0	0	1140000
chr1	1410000	1410500	chr1	2618000	2618500	3	7.58756	0.007659	391.696	1	0	0	0	0	0	0	1208000
chr1	1184000	1184500	chr1	2694500	2695000	3	8.1831	0.006148	487.964	1	0	0	0	0	0	0	1510500
chr1	1443000	1443500	chr1	2694500	2695000	3	7.70669	0.007334	409.054	1	0	0	1	0	0	0	1251500
chr1	1019000	1019500	chr1	2696000	2696500	3	8.51183	0.005443	551.167	1	0	0	1	0	0	0	1677000
chr1	1184000	1184500	chr1	2711000	2711500	3	8.22231	0.006059	495.131	1	0	0	0	0	0	0	1527000
chr1	1480000	1480500	chr1	2711000	2711500	3	7.62122	0.007566	396.511	0	0	0	1	0	0	0	1231000
chr1	1073000	1073500	chr1	2711500	2712000	3	8.39341	0.005687	527.519	1	0	0	0	0	0	0	1638500
chr1	1226000	1226500	chr1	2711500	2712000	8	41.0329	0.005977	1338.46	1	0	0	0	0	0	0	1485500
chr1	1119000	1119500	chr1	2722500	2723000	7	34.3319	0.005729	1221.85	1	0	0	0	0	0	0	1603500
chr1	1148500	1149000	chr1	2722500	2723000	9	48.3755	0.00584	1541.1	1	0	0	0	0	0	0	1574000
chr1	1013000	1013500	chr1	2733000	2733500	3	8.5395	0.005387	556.896	0	0	0	1	0	0	0	1720000
chr1	1030500	1031000	chr1	2733000	2733500	45	230.259	0.005274	8532.42	0	0	0	1	0	0	0	1702500
chr1	1018000	1018500	chr1	2762500	2763000	7	34.7576	0.00538	1301.12	0	0	0	0	1	0	0	1744500
chr1	1454000	1454500	chr1	2777500	2778000	3	7.79901	0.007089	423.191	1	0	0	0	0	0	0	1323500
chr1	1309000	1309500	chr1	2810000	2810500	5	20.4421	0.00619	807.754	1	0	0	1	0	0	0	1501000
chr1	1479500	1480000	chr1	2820500	2821000	3	7.90253	0.006823	439.689	0	1	0	1	0	0	0	1341000
chr1	1304500	1305000	chr1	2826000	2826500	3	8.20501	0.006098	491.965	0	0	0	0	1	1	0	1521500
chr1	1030500	1031000	chr1	2849500	2850000	27	195.496	0.004947	5457.85	1	0	0	0	0	0	0	1819000
chr1	1376000	1376500	chr1	2850500	2851000	3	8.13216	0.006266	478.774	1	0	0	0	0	0	0	1474500
chr1	1400500	1401000	chr1	2850500	2851000	3	8.07033	0.006412	467.873	1	0	0	0	0	0	0	1450000
chr1	1191000	1191500	chr1	2851500	2852000	4	14.555	0.005528	723.589	1	0	0	0	0	0	0	1660500
chr1	1164000	1164500	chr1	2871500	2872000	3	8.52005	0.005427	552.792	1	0	0	0	0	0	0	1707500
chr1	1301000	1301500	chr1	2871500	2872000	3	8.28979	0.00591	507.614	1	0	0	1	0	0	0	1570500
chr1	1443500	1444000	chr1	2871500	2872000	4	13.9145	0.006553	610.407	1	0	0	1	0	0	0	1428000
chr1	1134000	1134500	chr1	2872000	2872500	3	8.52425	0.005418	553.71	0	0	0	1	0	0	0	1738000
chr1	1299000	1299500	chr1	2872000	2872500	3	8.31504	0.005855	512.383	1	0	0	0	0	0	0	1573000
chr1	1311500	1312000	chr1	2876000	2876500	4	14.3425	0.005849	683.878	1	0	0	1	0	0	0	1564500
chr1	1384000	1384500	chr1	2876000	2876500	3	8.19588	0.006119	490.276	1	0	0	0	0	0	0	1492000
chr1	1423500	1424000	chr1	2876000	2876500	7	33.8732	0.006129	1142.11	0	0	0	1	0	0	0	1452500
chr1	1461500	1462000	chr1	2876000	2876500	4	13.9577	0.006478	617.475	1	0	0	0	0	0	0	1414500
chr1	1019500	1020000	chr1	2879000	2879500	7	35.2864	0.004976	1406.75	1	0	0	0	0	0	0	1859500
chr1	1004000	1004500	chr1	2886500	2887000	9	50.0721	0.004818	1868	1	0	0	0	0	0	0	1882500
chr1	1309000	1309500	chr1	2900000	2900500	12	71.0081	0.005631	2131.06	1	0	0	0	0	0	0	1591000
chr1	1430000	1430500	chr1	2909500	2910000	4	14.0366	0.006344	630.517	1	0	0	1	0	0	0	1479500
chr1	1468000	1468500	chr1	2938500	2939000	3	8.18451	0.006145	488.202	1	0	0	0	0	0	0	1470500
chr1	1308000	1308500	chr1	2943500	2944000	9	48.6346	0.005671	1587.02	1	0	0	0	0	0	0	1635500
chr1	1157000	1157500	chr1	2956000	2956500	3	8.77262	0.004937	607.656	0	0	0	1	0	0	0	1799000
chr1	1210500	1211000	chr1	2956000	2956500	3	8.61259	0.005243	572.191	0	0	0	1	0	0	0	1745500
chr1	1303000	1303500	chr1	2956000	2956500	3	8.42564	0.00562	533.808	1	0	0	0	0	0	0	1653000
chr1	1241500	1242000	chr1	2979500	2980000	7	34.7775	0.005365	1304.75	1	0	0	0	0	0	0	1738000
chr1	1301000	1301500	chr1	2980000	2980500	7	34.544	0.005552	1260.81	1	0	0	1	0	0	0	1679000
chr1	1350500	1351000	chr1	2980000	2980500	9	48.6349	0.005671	1587.02	1	0	0	0	0	0	0	1629500
chr1	1004000	1004500	chr1	2983500	2984000	4	15.0727	0.00481	831.601	1	0	0	0	0	0	0	1979500
chr1	1479500	1480000	chr1	2984000	2984500	4	14.2458	0.006002	666.445	0	0	0	1	0	0	0	1504500
chr1	1526000	1526500	chr1	2508000	2508500	3	7.16119	0.00895	335.196	0	0	0	1	0	0	0	982000
chr1	1583500	1584000	chr1	2508000	2508500	3	7.05107	0.009318	321.958	0	0	0	1	0	0	0	924500
chr1	1881000	1881500	chr1	2513500	2514000	6	23.0893	0.012214	491.24	1	0	0	0	0	0	0	632500
chr1	1575000	1575500	chr1	2560500	2561000	3	7.12022	0.009085	330.215	1	0	0	0	0	0	0	985500
chr1	1583500	1584000	chr1	2561000	2561500	4	12.7537	0.008914	448.732	1	0	0	0	0	0	0	977500
chr1	1628500	1629000	chr1	2561000	2561500	3	7.07342	0.009242	324.605	1	0	0	0	0	0	0	932500
chr1	1860500	1861000	chr1	2561500	2562000	5	17.4432	0.011594	431.258	1	0	0	1	0	0	0	701000
chr1	1523000	1523500	chr1	2565500	2566000	3	7.32628	0.008426	356.041	1	0	0	1	0	0	0	1042500
chr1	1881500	1882000	chr1	2576500	2577000	24	149.282	0.011821	2030.29	0	0	0	1	0	0	0	695000
chr1	1529000	1529500	chr1	2581000	2581500	3	7.18582	0.00887	338.219	1	0	0	1	0	0	0	1052000
chr1	1719500	1720000	chr1	2588000	2588500	6	24.2977	0.009902	605.938	1	0	0	0	0	0	0	868500
chr1	1834000	1834500	chr1	2588000	2588500	6	23.7835	0.010825	554.273	1	0	0	0	0	0	0	754000
chr1	1573500	1574000	chr1	2614000	2614500	3	7.18157	0.008884	337.686	1	0	0	0	0	0	0	1040500
chr1	1679000	1679500	chr1	2617000	2617500	3	7.0233	0.009413	318.708	1	0	0	0	0	0	0	938000
chr1	1644500	1645000	chr1	2618000	2618500	3	7.07867	0.009224	325.239	1	0	0	0	0	0	0	973500
chr1	1655000	1655500	chr1	2618000	2618500	3	7.14508	0.009003	333.222	1	0	0	0	0	0	0	963000
chr1	1639000	1639500	chr1	2636000	2636500	3	7.1351	0.009036	332.005	1	0	0	0	0	0	0	997000
chr1	1899500	1900000	chr1	2642000	2642500	8	36.0871	0.011298	708.09	0	0	0	1	0	0	0	742500
chr1	1941000	1941500	chr1	2642000	2642500	6	23.3017	0.011769	509.814	1	0	0	0	0	0	0	701000
chr1	1616000	1616500	chr1	2649500	2650000	4	12.85	0.00869	460.299	0	0	0	0	0	1	0	1033500
chr1	1527500	1528000	chr1	2661000	2661500	3	7.41883	0.008146	368.279	1	0	0	0	0	0	0	1133500
chr1	1639000	1639500	chr1	2685500	2686000	3	7.22935	0.00873	343.643	1	0	0	1	0	0	0	1046500
chr1	1505000	1505500	chr1	2687500	2688000	4	13.2866	0.007743	516.596	1	0	0	0	0	0	0	1182500
chr1	1605000	1605500	chr1	2688000	2688500	9	45.0845	0.008487	1060.45	0	0	0	1	0	0	0	1083000
chr1	1643500	1644000	chr1	2688000	2688500	10	51.7303	0.008728	1145.74	1	0	0	0	0	0	0	1044500
chr1	1963500	1964000	chr1	2688000	2688500	5	17.5568	0.011317	441.813	1	0	0	0	0	0	0	724500
chr1	1858500	1859000	chr1	2705000	2705500	5	18.097	0.010099	495.099	0	0	0	1	0	0	0	846500
chr1	1538000	1538500	chr1	2722500	2723000	6	25.7492	0.007703	778.917	1	0	0	0	0	0	0	1184500
chr1	1801000	1801500	chr1	2722500	2723000	4	12.5196	0.009483	421.807	0	0	0	1	0	0	0	921500
chr1	1854500	1855000	chr1	2723000	2723500	6	24.2564	0.009972	601.685	1	0	0	0	0	0	0	868500
chr1	1831500	1832000	chr1	2733000	2733500	4	12.3668	0.009874	405.104	0	1	0	1	0	0	0	901500
chr1	1921000	1921500	chr1	2733000	2733500	4	12.203	0.010311	387.935	0	0	0	1	0	0	0	812000
chr1	1881000	1881500	chr1	2752000	2752500	7	30.4453	0.010146	689.927	1	0	0	0	1	0	0	871000
chr1	1860500	1861000	chr1	2753500	2754000	6	24.3401	0.00983	610.376	1	0	0	1	0	0	0	893000
chr1	1899500	1900000	chr1	2754000	2754500	6	24.244	0.009994	600.36	0	0	0	1	0	0	0	854500
chr1	1638500	1639000	chr1	2770500	2771000	14	81.4247	0.008046	1740	1	0	0	0	0	0	0	1132000
chr1	1616500	1617000	chr1	2803500	2804000	15	89.4886	0.00771	1945.53	0	0	0	1	0	0	0	1187000
chr1	1941000	1941500	chr1	2805500	2806000	6	24.0985	0.010249	585.423	0	0	0	0	1	0	0	864500
chr1	1771000	1771500	chr1	2810500	2811000	3	7.25799	0.008639	347.262	0	0	0	1	0	0	0	1039500
chr1	1705000	1705500	chr1	2819000	2819500	6	25.3423	0.008261	726.304	1	0	0	0	0	0	0	1114000
chr1	1841500	1842000	chr1	2820000	2820500	3	7.10627	0.009132	328.515	0	0	0	1	0	0	0	978500
chr1	1788500	1789000	chr1	2821500	2822000	3	7.30542	0.008491	353.315	1	0	0	1	0	0	0	1033000
chr1	1705000	1705500	chr1	2825000	2825500	4	13.1188	0.008094	494.193	1	0	0	0	0	0	0	1120000
chr1	1788500	1789000	chr1	2839000	2839500	3	7.11809	0.009093	329.924	1	0	0	0	0	0	0	1050500
chr1	1522500	1523000	chr1	2849500	2850000	3	7.76279	0.007184	417.595	1	0	0	0	0	0	0	1327000
chr1	1606500	1607000	chr1	2850500	2851000	3	7.66604	0.007443	403.063	1	0	0	1	0	0	0	1244000
chr1	1605500	1606000	chr1	2851500	2852000	7	32.8284	0.007144	979.843	1	0	0	0	0	0	0	1246000
chr1	1773500	1774000	chr1	2851500	2852000	7	31.9082	0.00818	855.746	1	0	0	0	0	0	0	1078000
chr1	1933000	1933500	chr1	2851500	2852000	3	6.99183	0.009521	315.093	1	0	0	1	0	0	0	918500
chr1	1519500	1520000	chr1	2856000	2856500	5	19.7398	0.007169	697.447	0	0	0	1	0	0	0	1336500
chr1	1724000	1724500	chr1	2856000	2856500	4	13.1245	0.008082	494.927	0	1	0	0	0	0	0	1132000
chr1	1504000	1504500	chr1	2871500	2872000	5	19.97	0.006832	731.85	1	0	0	0	0	0	0	1367500
chr1	1768000	1768500	chr1	2871500	2872000	3	7.34959	0.008355	359.066	1	0	0	0	0	0	0	1103500
chr1	1786000	1786500	chr1	2871500	2872000	3	7.36499	0.008308	361.098	1	0	0	0	0	0	0	1085500
chr1	1971000	1971500	chr1	2889500	2890000	7	30.7574	0.009688	722.543	1	0	0	0	1	0	0	918500
chr1	1977500	1978000	chr1	2905500	2906000	3	7.0646	0.009272	323.555	1	0	0	0	0	0	0	928000
chr1	1975500	1976000	chr1	2915500	2916000	3	7.02013	0.009424	318.336	1	0	0	1	0	0	0	940000
chr1	1763500	1764000	chr1	2918000	2918500	3	7.51656	0.00786	381.679	0	0	0	1	0	0	0	1154500
chr1	1841500	1842000	chr1	2921000	2921500	4	12.8946	0.008588	465.766	0	0	0	1	0	0	0	1079500
chr1	1887000	1887500	chr1	2932000	2932500	3	7.21561	0.008774	341.919	1	0	0	0	0	0	0	1045000
chr1	1954500	1955000	chr1	2932000	2932500	3	7.07865	0.009224	325.239	1	0	0	0	0	0	0	977500
chr1	1639000	1639500	chr1	2938500	2939000	9	46.9181	0.006893	1305.67	1	0	0	0	0	0	0	1299500
chr1	1714000	1714500	chr1	2939500	2940000	17	104.975	0.007562	2248.08	1	0	0	0	0	0	0	1225500
chr1	1705500	1706000	chr1	2940500	2941000	3	7.58065	0.007679	390.676	1	0	0	0	0	0	0	1235000
chr1	1987500	1988000	chr1	2953500	2954000	6	24.7107	0.009216	651.042	1	0	0	0	0	0	0	966000
chr1	1664500	1665000	chr1	2956000	2956500	3	7.76952	0.007166	418.644	1	0	0	0	0	0	0	1291500
chr1	1764000	1764500	chr1	2965000	2965500	4	13.4304	0.007454	536.625	0	0	0	1	0	0	0	1201000
chr1	1894500	1895000	chr1	2979500	2980000	10	51.9147	0.008564	1167.68	1	0	0	0	0	0	0	1085000
chr1	1576000	1576500	chr1	2991500	2992000	3	8.10736	0.006324	474.383	1	0	0	0	0	0	0	1415500
chr1	1697000	1697500	chr1	2992000	2992500	3	7.78624	0.007122	421.23	1	0	0	0	0	0	0	1295000
chr1	2105000	2105500	chr1	2502000	2502500	7	26.7756	0.017549	398.883	1	0	0	0	1	0	0	397000
chr1	2162500	2163000	chr1	2502000	2502500	6	20.2043	0.020338	295.014	0	0	0	0	1	0	0	339500
chr1	2275000	2275500	chr1	2502000	2502500	7	23.1968	0.029847	234.529	1	0	0	0	0	0	0	227000
chr1	2392000	2392500	chr1	2502000	2502500	6	13.581	0.066043	90.8499	0	0	0	1	0	0	0	110000
chr1	2406000	2406500	chr1	2502000	2502500	8	20.3682	0.087853	91.0612	0	0	0	1	0	0	0	96000
chr1	2414000	2414500	chr1	2502000	2502500	10	29.0643	0.09041	110.607	1	0	0	0	0	0	0	88000
chr1	2474000	2474500	chr1	2502000	2502500	13	22.1902	0.498841	26.0604	1	0	0	0	0	0	0	28000
chr1	2432500	2433000	chr1	2502500	2503000	6	10.2575	0.119904	50.04	1	0	0	0	0	0	0	70000
chr1	2234500	2235000	chr1	2528500	2529000	4	9.19668	0.023317	171.549	0	0	0	0	1	0	0	294000
chr1	2433500	2434000	chr1	2530000	2530500	5	8.11911	0.088236	56.6662	1	0	0	0	0	0	0	96500
chr1	2067500	2068000	chr1	2534000	2534500	4	10.8492	0.0148	270.27	1	0	0	1	0	0	0	466500
chr1	2469500	2470000	chr1	2541500	2542000	8	18.0372	0.119441	66.9787	0	1	0	0	0	0	0	72000
chr1	2121500	2122000	chr1	2553000	2553500	4	10.4681	0.016403	243.858	1	0	0	0	0	0	0	431500
chr1	2469500	2470000	chr1	2560000	2560500	5	8.11174	0.088383	56.572	0	0	0	1	0	0	0	90500
chr1	2234000	2234500	chr1	2565500	2566000	4	9.46779	0.021502	186.029	1	0	0	1	0	0	0	331500
chr1	2191000	2191500	chr1	2576500	2577000	4	10.085	0.018172	220.119	0	0	0	1	0	0	0	385500
chr1	2103500	2104000	chr1	2584500	2585000	5	16.3372	0.014645	341.413	1	0	0	0	0	0	0	481000
chr1	2397500	2398000	chr1	2587500	2588000	8	27.6973	0.033547	238.471	1	0	0	0	0	0	0	190000
chr1	2374500	2375000	chr1	2588000	2588500	8	28.3161	0.03095	258.481	1	0	0	0	0	0	0	213500
chr1	2444000	2444500	chr1	2588000	2588500	8	24.9662	0.047789	167.403	1	0	0	1	0	0	0	144000
chr1	2433000	2433500	chr1	2589500	2590000	21	99.5599	0.043868	478.709	0	0	0	0	1	0	0	156500
chr1	2424000	2424500	chr1	2591000	2591500	4	7.19538	0.041036	97.4754	0	0	0	1	0	0	0	167000
chr1	2276500	2277000	chr1	2614500	2615000	11	49.4648	0.020643	532.868	1	0	0	0	0	0	0	338000
chr1	2376000	2376500	chr1	2614500	2615000	10	40.2246	0.028406	352.038	1	0	0	0	0	0	0	238500
chr1	2403000	2403500	chr1	2617000	2617500	4	8.1735	0.031293	127.824	1	0	0	0	0	0	0	214000
chr1	2484500	2485000	chr1	2617000	2617500	13	50.2863	0.051964	250.173	1	0	0	0	0	0	0	132500
chr1	2462500	2463000	chr1	2646500	2647000	4	7.7568	0.035153	113.788	0	0	0	1	0	0	0	184000
chr1	2439000	2439500	chr1	2650000	2650500	4	8.14802	0.031517	126.916	0	0	0	0	0	1	0	211000
chr1	2076000	2076500	chr1	2687500	2688000	4	11.5066	0.012422	322.009	1	0	0	0	0	0	0	611500
chr1	2289500	2290000	chr1	2688000	2688500	5	15.5772	0.017287	289.235	1	0	0	1	0	0	0	398500
chr1	2461000	2461500	chr1	2688000	2688500	9	34.0545	0.030025	299.75	0	0	0	1	0	0	0	227000
chr1	2247500	2248000	chr1	2699000	2699500	4	10.6135	0.015769	253.662	1	0	0	1	0	0	0	451500
chr1	2484500	2485000	chr1	2699500	2700000	4	8.07266	0.032193	124.251	1	0	0	0	0	0	0	215000
chr1	2439000	2439500	chr1	2717500	2718000	6	19.1276	0.024533	244.569	0	0	0	1	0	0	0	278500
chr1	2030000	2030500	chr1	2722500	2723000	8	35.7827	0.011754	680.619	1	0	0	0	0	0	0	692500
chr1	2163000	2163500	chr1	2722500	2723000	5	16.8603	0.013116	381.214	0	0	0	0	1	0	0	559500
chr1	2201500	2202000	chr1	2722500	2723000	7	28.2685	0.014066	497.654	1	0	0	1	0	0	0	521000
chr1	2468000	2468500	chr1	2722500	2723000	7	23.8311	0.027151	257.817	1	0	0	0	0	0	0	254500
chr1	2030000	2030500	chr1	2723000	2723500	8	35.8187	0.011699	683.819	1	0	0	0	0	0	0	693000
chr1	2120000	2120500	chr1	2723000	2723500	5	17.0905	0.012494	400.192	1	0	0	0	0	0	0	603000
chr1	2415000	2415500	chr1	2723000	2723500	8	30.8185	0.022286	358.97	1	0	0	1	0	0	0	308000
chr1	2229500	2230000	chr1	2733000	2733500	5	16.5642	0.01396	358.166	0	0	0	1	0	0	0	503500
chr1	2389500	2390000	chr1	2733000	2733500	4	9.68222	0.02026	197.433	0	0	0	1	0	0	0	343500
chr1	2439000	2439500	chr1	2736500	2737000	6	19.3498	0.023602	254.216	0	0	0	1	0	0	0	297500
chr1	2000500	2001000	chr1	2762500	2763000	7	29.9115	0.01098	637.523	1	0	0	0	0	0	0	762000
chr1	2228000	2228500	chr1	2762500	2763000	7	28.483	0.013623	513.837	0	0	0	0	1	0	0	534500
chr1	2024500	2025000	chr1	2763000	2763500	5	17.7167	0.010937	457.164	1	0	0	0	0	0	0	738500
chr1	2484500	2485000	chr1	2771500	2772000	4	9.12359	0.023852	167.701	1	0	0	0	0	0	0	287000
chr1	2433500	2434000	chr1	2811500	2812000	5	15.3053	0.018382	272.005	1	0	0	1	0	0	0	378000
chr1	2424000	2424500	chr1	2821500	2822000	6	21.2309	0.017006	352.817	0	1	0	1	0	0	0	397500
chr1	2007500	2008000	chr1	2850500	2851000	4	12.1003	0.010595	377.537	1	0	0	0	0	0	0	843000
chr1	2207000	2207500	chr1	2850500	2851000	4	11.5647	0.012229	327.091	1	0	0	0	0	0	0	643500
chr1	2294500	2295000	chr1	2851000	2851500	22	131.466	0.013423	1638.98	1	0	0	0	0	0	0	556500
chr1	2024000	2024500	chr1	2851500	2852000	5	17.9742	0.010361	482.579	1	0	0	0	0	0	0	827500
chr1	2168500	2169000	chr1	2851500	2852000	5	17.3348	0.011865	421.408	1	0	0	1	0	0	0	683000
chr1	2486500	2487000	chr1	2851500	2852000	4	9.92415	0.018975	210.804	1	0	0	0	0	0	0	365000
chr1	2368500	2369000	chr1	2854500	2855000	11	53.1384	0.014661	750.29	1	0	0	0	0	0	0	486000
chr1	2409500	2410000	chr1	2854500	2855000	11	52.4087	0.01569	701.083	0	0	0	1	0	0	0	445000
chr1	2239500	2240000	chr1	2871500	2872000	4	11.4378	0.012653	316.131	0	0	0	0	1	0	0	632000
chr1	2435500	2436000	chr1	2876000	2876500	4	10.5813	0.015906	251.477	1	0	0	1	0	0	0	440500
chr1	2441000	2441500	chr1	2876000	2876500	5	15.8986	0.01609	310.752	1	0	0	1	0	0	0	435000
chr1	2433500	2434000	chr1	2880500	2881000	5	15.9585	0.015882	314.822	1	0	0	0	0	0	0	447000
chr1	2442000	2442500	chr1	2921000	2921500	4	10.8204	0.014913	268.222	0	0	0	1	0	0	0	479000
chr1	2145000	2145500	chr1	2932000	2932500	5	17.9407	0.010435	479.157	1	0	0	0	0	0	0	787000
chr1	2424000	2424500	chr1	2942500	2943000	4	11.0774	0.013933	287.088	0	0	0	1	0	0	0	518500
chr1	2439000	2439500	chr1	2942500	2943000	7	28.1944	0.014221	492.23	0	0	0	1	0	0	0	503500
chr1	2413500	2414000	chr1	2956000	2956500	4	11.3068	0.013106	305.204	1	0	0	0	0	0	0	542500
chr1	2494000	2494500	chr1	2962500	2963000	4	10.7289	0.015282	261.746	1	0	0	0	0	0	0	468500
chr1	2484500	2485000	chr1	2972500	2973000	4	10.9919	0.014252	280.662	1	0	0	0	0	0	0	488000
chr1	2156500	2157000	chr1	2979500	2980000	8	36.7152	0.010408	768.64	1	0	0	0	0	0	0	823000
chr1	2446000	2446500	chr1	2979500	2980000	7	28.4163	0.013759	508.758	0	0	0	1	0	0	0	533500
chr1	2502000	2502500	chr1	2508000	2508500	19	7.76123	4.04673	4.69515	0	0	0	1	0	0	0	6000
chr1	2502000	2502500	chr1	2512500	2513000	16	11.5832	2.09202	7.64812	1	0	0	0	0	0	0	10500
chr1	2502000	2502500	chr1	2514000	2514500	15	11.7873	1.7628	8.50918	1	0	0	0	0	0	0	12000
chr1	2552500	2553000	chr1	2560500	2561000	16	7.50505	2.90631	5.50527	1	0	0	0	0	0	0	8000
chr1	2565500	2566000	chr1	2587500	2588000	9	7.57416	0.720506	12.4912	1	0	0	1	0	0	0	22000
chr1	2534000	2534500	chr1	2588000	2588500	11	26.994	0.17132	64.2073	1	0	0	1	0	0	0	54000
chr1	2541000	2541500	chr1	2588000	2588500	7	9.87012	0.230682	30.3448	1	0	0	1	0	0	0	47000
chr1	2548500	2549000	chr1	2588000	2588500	7	8.5133	0.290249	24.1172	1	0	0	0	0	0	0	39500
chr1	2563000	2563500	chr1	2588000	2588500	11	13.9744	0.618199	17.7936	1	0	0	1	0	0	0	25000
chr1	2560000	2560500	chr1	2614500	2615000	10	22.8039	0.174546	57.2915	1	0	0	0	0	0	0	54500
chr1	2563000	2563500	chr1	2614500	2615000	17	50.4214	0.198484	85.6492	1	0	0	1	0	0	0	51500
chr1	2584000	2584500	chr1	2614500	2615000	15	30.5985	0.433968	34.5648	1	0	0	0	0	0	0	30500
chr1	2591000	2591500	chr1	2614500	2615000	14	21.5571	0.672053	20.8317	1	0	0	0	0	0	0	23500
chr1	2614500	2615000	chr1	2618500	2619000	32	18.0502	6.55557	4.88134	1	0	0	0	0	0	0	4000
chr1	2502000	2502500	chr1	2619500	2620000	5	9.63478	0.062043	80.5893	1	0	0	0	0	0	0	117500
chr1	2617500	2618000	chr1	2619500	2620000	38	12.279	11.3935	3.33525	1	0	0	0	0	0	0	2000
chr1	2617500	2618000	chr1	2620500	2621000	71	79.6307	8.53201	8.3216	0	0	0	0	1	0	0	3000
chr1	2618000	2618500	chr1	2620500	2621000	52	37.0281	9.75692	5.32955	0	0	0	0	1	0	0	2500
chr1	2614500	2615000	chr1	2629000	2629500	15	14.7869	1.39375	10.7623	1	0	0	0	0	0	0	14500
chr1	2617500	2618000	chr1	2634000	2634500	73	223.864	1.11413	65.5222	1	0	0	0	0	0	0	16500
chr1	2502000	2502500	chr1	2636000	2636500	7	19.466	0.052506	133.318	1	0	0	0	0	0	0	134000
chr1	2614500	2615000	chr1	2636000	2636500	11	11.7897	0.772706	14.2357	1	0	0	0	0	0	0	21500
chr1	2588000	2588500	chr1	2641000	2641500	9	18.5008	0.184184	48.8642	1	0	0	0	0	0	0	53000
chr1	2614500	2615000	chr1	2649500	2650000	8	9.66448	0.375614	21.2985	0	0	0	0	1	0	0	35000
chr1	2537500	2538000	chr1	2687500	2688000	5	10.9666	0.046515	107.492	1	0	0	1	0	0	0	150000
chr1	2613000	2613500	chr1	2687500	2688000	5	6.97251	0.113993	43.8623	1	0	0	0	0	0	0	74500
chr1	2671500	2672000	chr1	2687500	2688000	11	7.63184	1.21599	9.04616	1	0	0	0	0	0	0	16000
chr1	2684500	2685000	chr1	2687500	2688000	28	7.34701	8.48994	3.29802	1	0	0	0	0	0	0	3000
chr1	2685500	2686000	chr1	2687500	2688000	34	7.94701	11.4205	2.9771	1	0	0	1	0	0	0	2000
chr1	2520000	2520500	chr1	2688000	2688500	8	26.306	0.040176	199.124	1	0	0	0	0	0	0	168000
chr1	2645000	2645500	chr1	2688000	2688500	7	8.73248	0.279891	25.0097	1	0	0	0	0	0	0	43000
chr1	2688000	2688500	chr1	2700000	2700500	14	9.828	1.75497	7.97734	1	0	0	0	0	0	0	12000
chr1	2617000	2617500	chr1	2702000	2702500	6	11.7671	0.09127	65.739	1	0	0	0	0	0	0	85000
chr1	2588000	2588500	chr1	2717000	2717500	8	23.8551	0.055267	144.752	1	0	0	0	0	0	0	129000
chr1	2675000	2675500	chr1	2722500	2723000	6	7.01726	0.222395	26.979	1	0	0	0	0	0	0	47500
chr1	2647000	2647500	chr1	2723000	2723500	9	22.724	0.111651	80.6083	1	0	0	0	0	0	0	76000
chr1	2674000	2674500	chr1	2723000	2723500	8	13.8604	0.211048	37.9061	1	0	0	0	0	0	0	49000
chr1	2502000	2502500	chr1	2735000	2735500	4	8.46959	0.02881	138.841	1	0	0	0	0	0	0	233000
chr1	2723000	2723500	chr1	2736000	2736500	19	21.955	1.61142	11.7908	1	0	0	0	0	0	0	13000
chr1	2588000	2588500	chr1	2749000	2749500	9	30.9362	0.042921	209.688	1	0	0	0	0	0	0	161000
chr1	2722500	2723000	chr1	2751500	2752000	8	7.98156	0.483512	16.5456	1	0	0	0	0	0	0	29000
chr1	2723000	2723500	chr1	2760000	2760500	7	7.80504	0.326203	21.459	1	0	0	0	0	0	0	37000
chr1	2614500	2615000	chr1	2760500	2761000	13	51.359	0.047734	272.343	1	0	0	0	0	0	0	146000
chr1	2622500	2623000	chr1	2762500	2763000	9	29.5724	0.050265	179.051	1	0	0	0	0	0	0	140000
chr1	2736000	2736500	chr1	2762500	2763000	11	14.9197	0.561496	19.5905	1	0	0	0	0	0	0	26500
chr1	2722000	2722500	chr1	2763000	2763500	9	14.9215	0.284634	31.6196	1	0	0	0	0	0	0	41000
chr1	2588500	2589000	chr1	2777500	2778000	4	7.64772	0.036229	110.409	0	0	0	1	0	0	0	189000
chr1	2722500	2723000	chr1	2778000	2778500	9	18.8851	0.176033	51.1268	1	0	0	0	0	0	0	55500
chr1	2628500	2629000	chr1	2800500	2801000	7	21.3611	0.039524	177.108	1	0	0	0	0	0	0	172000
chr1	2778000	2778500	chr1	2800500	2801000	10	9.6821	0.739662	13.5197	1	0	0	0	0	0	0	22500
chr1	2688000	2688500	chr1	2803500	2804000	6	13.8724	0.062693	95.7045	1	0	0	0	0	0	0	115500
chr1	2733000	2733500	chr1	2808000	2808500	5	6.99966	0.113307	44.1279	0	0	0	1	0	0	0	75000
chr1	2762500	2763000	chr1	2811500	2812000	10	21.1171	0.209598	47.7104	1	0	0	1	0	0	0	49000
chr1	2762500	2763000	chr1	2812000	2812500	6	7.4418	0.205334	29.2207	1	0	0	0	0	0	0	49500
chr1	2687500	2688000	chr1	2818500	2819000	6	14.6313	0.054752	109.585	1	0	0	0	0	0	0	131000
chr1	2762500	2763000	chr1	2821500	2822000	16	48.8175	0.166157	96.2945	1	0	0	1	0	0	0	59000
chr1	2588000	2588500	chr1	2825500	2826000	8	28.9331	0.02854	280.308	1	0	0	1	0	0	0	237500
chr1	2772000	2772500	chr1	2841000	2841500	6	10.0394	0.124737	48.1012	1	0	0	0	0	0	0	69000
chr1	2800500	2801000	chr1	2848000	2848500	6	6.96376	0.22464	26.7094	1	0	0	0	0	0	0	47500
chr1	2645500	2646000	chr1	2850500	2851000	4	8.04362	0.032456	123.244	1	0	0	0	0	0	0	205000
chr1	2657000	2657500	chr1	2851000	2851500	19	92.1553	0.034051	557.987	1	0	0	0	0	0	0	194000
chr1	2807500	2808000	chr1	2851000	2851500	17	44.7505	0.280311	60.6469	1	0	0	0	0	0	0	43500
chr1	2825500	2826000	chr1	2851000	2851500	24	56.7343	0.599868	40.0088	1	0	0	1	0	0	0	25500
chr1	2840000	2840500	chr1	2851500	2852000	14	8.93434	1.90894	7.33391	1	0	0	0	0	0	0	11500
chr1	2647000	2647500	chr1	2854500	2855000	13	56.0997	0.032874	395.449	1	0	0	0	0	0	0	207500
chr1	2650500	2651000	chr1	2854500	2855000	11	44.5078	0.032742	335.96	0	0	0	0	1	0	0	204000
chr1	2841000	2841500	chr1	2854500	2855000	24	36.4637	1.47489	16.2724	1	0	0	0	0	0	0	13500
chr1	2694500	2695000	chr1	2855000	2855500	4	7.12744	0.041813	95.664	1	0	0	0	0	0	0	160500
chr1	2662000	2662500	chr1	2856000	2856500	6	17.4654	0.032822	182.804	0	0	0	1	0	0	0	194000
chr1	2854500	2855000	chr1	2867000	2867500	22	29.0119	1.63913	13.4218	1	0	0	0	0	0	0	12500
chr1	2534000	2534500	chr1	2871500	2872000	4	9.72755	0.020011	199.89	1	0	0	1	0	0	0	337500
chr1	2671500	2672000	chr1	2871500	2872000	4	7.94449	0.033365	119.886	1	0	0	0	0	0	0	200000
chr1	2772500	2773000	chr1	2871500	2872000	5	8.25169	0.085627	58.3928	1	0	0	0	0	0	0	99000
chr1	2866000	2866500	chr1	2871500	2872000	22	10.1836	4.58638	4.79681	1	0	0	0	0	0	0	5500
chr1	2800500	2801000	chr1	2872500	2873000	7	13.9075	0.123258	56.7914	1	0	0	0	0	0	0	72000
chr1	2661000	2661500	chr1	2876000	2876500	5	12.8585	0.031037	161.098	1	0	0	0	0	0	0	215000
chr1	2829000	2829500	chr1	2876000	2876500	6	6.97812	0.224038	26.7812	0	0	0	1	0	0	0	47000
chr1	2723000	2723500	chr1	2883000	2883500	5	11.3614	0.042743	116.978	1	0	0	1	0	0	0	160000
chr1	2854500	2855000	chr1	2887000	2887500	11	17.6668	0.424298	25.9252	1	0	0	0	0	0	0	32500
chr1	2502000	2502500	chr1	2888500	2889000	5	15.4304	0.017873	279.752	0	0	0	1	0	0	0	386500
chr1	2854500	2855000	chr1	2889500	2890000	10	15.5867	0.380924	26.252	1	0	0	0	1	0	0	35000
chr1	2777500	2778000	chr1	2905500	2906000	5	10.2379	0.054426	91.8679	1	0	0	0	0	0	0	128000
chr1	2687500	2688000	chr1	2910500	2911000	4	8.28711	0.030315	131.948	1	0	0	0	0	0	0	223000
chr1	2800500	2801000	chr1	2928500	2929000	17	70.5578	0.05895	288.38	0	0	0	1	0	0	0	128000
chr1	2851000	2851500	chr1	2931500	2932000	20	77.3387	0.099539	200.926	1	0	0	0	0	0	0	80500
chr1	2507500	2508000	chr1	2932000	2932500	5	15.9427	0.015936	313.755	0	0	0	1	0	0	0	424500
chr1	2648500	2649000	chr1	2932000	2932500	4	9.08336	0.024151	165.625	1	0	0	0	0	0	0	283500
chr1	2688000	2688500	chr1	2946000	2946500	8	29.5214	0.026387	303.18	1	0	0	1	0	0	0	258000
chr1	2800500	2801000	chr1	2946000	2946500	7	20.0705	0.047961	145.952	1	0	0	1	0	0	0	145500
chr1	2762000	2762500	chr1	2956000	2956500	4	7.79236	0.034808	114.916	1	0	0	0	0	0	0	194000
chr1	2617000	2617500	chr1	2956500	2957000	4	9.57218	0.020885	191.525	1	0	0	0	0	0	0	339500
chr1	2617000	2617500	chr1	2962500	2963000	4	9.67819	0.020283	197.209	1	0	0	0	0	0	0	345500
chr1	2851500	2852000	chr1	2965000	2965500	13	48.2117	0.061199	212.422	0	0	0	1	0	0	0	113500
chr1	2688000	2688500	chr1	2968000	2968500	10	41.4554	0.025038	399.393	1	0	0	0	0	0	0	280000
chr1	2910000	2910500	chr1	2979500	2980000	7	14.063	0.120344	58.1666	1	0	0	0	0	0	0	69500
chr1	2517000	2517500	chr1	2980000	2980500	9	39.7096	0.015681	573.943	1	0	0	0	0	0	0	463000
chr1	2705000	2705500	chr1	2980000	2980500	7	24.4691	0.024691	283.504	1	0	0	0	0	0	0	275000
chr1	2972500	2973000	chr1	2980000	2980500	20	13.2268	3.11533	6.41986	1	0	0	0	0	0	0	7500
chr1	2978000	2978500	chr1	2980000	2980500	33	7.06124	11.3517	2.90705	1	0	0	0	0	0	0	2000
chr1	2711500	2712000	chr1	2980500	2981000	4	8.89434	0.025547	156.574	1	0	0	0	0	0	0	269000
chr1	204000	204500	chr1	3005000	3005500	7	36.885	0.003925	1783.44	1	0	0	0	0	0	0	2801000
chr1	437000	437500	chr1	3012500	3013000	3	9.25948	0.004068	737.463	1	0	0	0	0	0	0	2575500
chr1	203000	203500	chr1	3028000	3028500	3	9.25251	0.00408	735.294	0	0	0	1	0	0	0	2825000
chr1	88500	89000	chr1	3029500	3030000	40	230.259	0.003787	10562.5	1	0	0	0	0	0	0	2941000
chr1	187500	188000	chr1	3029500	3030000	8	44.1967	0.003979	2010.56	0	0	0	0	1	0	0	2842000
chr1	234000	234500	chr1	3030000	3030500	11	67.1283	0.004013	2741.09	1	0	0	0	0	0	0	2796000
chr1	130000	130500	chr1	3034000	3034500	3	9.37217	0.003888	771.605	1	0	0	0	0	0	0	2904000
chr1	41500	42000	chr1	3035500	3036000	19	133.768	0.003716	5113.02	1	0	0	0	0	0	0	2994000
chr1	292000	292500	chr1	3063000	3063500	10	59.3811	0.003998	2501.25	1	0	0	0	0	0	0	2771000
chr1	490000	490500	chr1	3073500	3074000	6	29.2483	0.004202	1427.89	1	0	0	1	0	0	0	2583500
chr1	415000	415500	chr1	3075000	3075500	3	9.21513	0.004143	724.113	1	0	0	0	0	0	0	2660000
chr1	407000	407500	chr1	3104500	3105000	3	9.28885	0.004019	746.454	1	0	0	1	0	0	0	2697500
chr1	470000	470500	chr1	3113500	3114000	3	9.26949	0.004051	740.558	0	0	0	1	0	0	0	2643500
chr1	143000	143500	chr1	3120500	3121000	3	9.39643	0.003852	778.816	0	0	0	1	0	0	0	2977500
chr1	143500	144000	chr1	3122000	3122500	3	9.45598	0.003765	796.813	0	1	0	1	0	0	0	2978500
chr1	407000	407500	chr1	3133000	3133500	3	9.30329	0.003996	750.751	1	0	0	0	0	0	0	2726000
chr1	416000	416500	chr1	3133500	3134000	3	9.25907	0.004069	737.282	1	0	0	0	0	0	0	2717500
chr1	288000	288500	chr1	3147500	3148000	4	15.8787	0.003843	1040.85	0	0	0	1	0	0	0	2859500
chr1	338000	338500	chr1	3151500	3152000	3	9.28192	0.004031	744.232	0	0	0	1	0	0	0	2813500
[truncated: 106,085 more rows]
