# Supplementary material for: Genome-wide identification of silencers and their regulatory mechanism in gene transcription in Arabidopsis
Source: Research Square preprint supplement (doi:10.21203/rs.3.rs-5559292/v1), 2025-01-13
Supplement: Supplementary file 2 [file 36a6304ab176b07a600b33b6.xlsx]

## Sheet: Sheet1
Supplementary Table 5 Information of data used in this study
Type	Run	BioSample	Genotype	Reads	Tissues	Name	Reference
ATAC	SRR12265344	SAMN15579745	col-0	paired 150bp	10-day	atac_col0_1	H2AK121ub in Arabidopsis associates with a less accessible chromatin state at transcriptional regulation hotspots
ATAC	SRR12265345	SAMN15579744	col-0	paired 150bp	10-day	atac_col0_2	H2AK121ub in Arabidopsis associates with a less accessible chromatin state at transcriptional regulation hotspots
ATAC	SRR13700607	SAMN17901032	col-0	paired 150bp	10-day	ATAC-seq rep 1	The histone variant H2A.W and linker histone H1 co-regulate heterochromatin accessibility and DNA methylation
ATAC	SRR13700608	SAMN17901031	col-0	paired 150bp	10-day	ATAC-seq rep 2	The histone variant H2A.W and linker histone H1 co-regulate heterochromatin accessibility and DNA methylation
ATAC	SRR10768872	SAMN13683134				ATAC_Ep_LD-rep1	Photoperiod-mediated Chromatin Accessibility in the Single Cell Types of Leaf Phloem and Epidermis in Arabidopsis
ATAC	SRR10768873	SAMN13683133				ATAC_Ep_LD-rep2	Photoperiod-mediated Chromatin Accessibility in the Single Cell Types of Leaf Phloem and Epidermis in Arabidopsis
ATAC	SRR10768874	SAMN13683132				ATAC_Ep_SD-rep1	Photoperiod-mediated Chromatin Accessibility in the Single Cell Types of Leaf Phloem and Epidermis in Arabidopsis
ATAC	SRR10768875	SAMN13683131				ATAC_Ep_SD-rep2	Photoperiod-mediated Chromatin Accessibility in the Single Cell Types of Leaf Phloem and Epidermis in Arabidopsis
ATAC	SRR10768876	SAMN13683130				ATAC_Va_LD-rep1	Photoperiod-mediated Chromatin Accessibility in the Single Cell Types of Leaf Phloem and Epidermis in Arabidopsis
ATAC	SRR10768877	SAMN13683129				ATAC_Va_LD-rep2	Photoperiod-mediated Chromatin Accessibility in the Single Cell Types of Leaf Phloem and Epidermis in Arabidopsis
ATAC	SRR10768878	SAMN13683128				ATAC_Va_SD-rep1	Photoperiod-mediated Chromatin Accessibility in the Single Cell Types of Leaf Phloem and Epidermis in Arabidopsis
ATAC	SRR10768879	SAMN13683127				ATAC_Va_SD-rep2	Photoperiod-mediated Chromatin Accessibility in the Single Cell Types of Leaf Phloem and Epidermis in Arabidopsis
RNAPIII	DRR195415	SAMD00191312	col-0	paired 150bp	Two-weekold whole seedlings	phospho Ser2_wt_input	Epigenetic regulation of spurious transcription initiation in Arabidopsis
RNAPIII	DRR195416	SAMD00191313	col-0	paired 150bp	Two-weekold whole seedlings	phospho Ser2_wt_IP1	Epigenetic regulation of spurious transcription initiation in Arabidopsis
RNAPIII	DRR195417	SAMD00191314	col-0	paired 150bp	Two-weekold whole seedlings	phospho Ser2_wt_IP2	Epigenetic regulation of spurious transcription initiation in Arabidopsis
RNAPIII	DRR195427	SAMD00191324	col-0	paired 150bp	Two-weekold whole seedlings	phospho Ser5_wt_input	Epigenetic regulation of spurious transcription initiation in Arabidopsis
RNAPIII	DRR195428	SAMD00191325	col-0	paired 150bp	Two-weekold whole seedlings	phospho Ser5_wt_IP1	Epigenetic regulation of spurious transcription initiation in Arabidopsis
RNAPIII	DRR195429	SAMD00191326	col-0	paired 150bp	Two-weekold whole seedlings	phospho Ser5_wt_IP2	Epigenetic regulation of spurious transcription initiation in Arabidopsis
H3K27me1	ERR4615148	SAMEA7330884	col-0	SINGLE 76		L5_H3K27me1_rep1_s	DNA polymerase epsilon is required for heterochromatin maintenance in Arabidopsis
H3K27me1	ERR4615149	SAMEA7330885	col-0	SINGLE 76		L5_H3K27me1_rep2_s	DNA polymerase epsilon is required for heterochromatin maintenance in Arabidopsis
H3K27me1	ERR4615154	SAMEA7330890	col-0	SINGLE 76		L5_input_rep1_s	DNA polymerase epsilon is required for heterochromatin maintenance in Arabidopsis
H3K27me1	ERR4615155	SAMEA7330891	col-0	SINGLE 76		L5_input_rep2_s	DNA polymerase epsilon is required for heterochromatin maintenance in Arabidopsis
H3K14ac_3	SRR5011158	SAMN06010018	col-0	paired 100bp	10day	Col_K14ac	POWERDRESS-mediated histone deacetylation is essential for thermomorphogenesis in Arabidopsis thaliana
input	SRR5011163	SAMN06010021	col-0	SINGLE 76bp	10day	Col_input_rep1	POWERDRESS-mediated histone deacetylation is essential for thermomorphogenesis in Arabidopsis thaliana
H3K9ac_3	SRR5011164	SAMN06010015	col-0	SINGLE 76bp	10day	Col_K9_rep1	POWERDRESS-mediated histone deacetylation is essential for thermomorphogenesis in Arabidopsis thaliana
input	SRR5011169	SAMN06010010	col-0	SINGLE 76bp	10day	Col_input_rep2	POWERDRESS-mediated histone deacetylation is essential for thermomorphogenesis in Arabidopsis thaliana
H3K9ac_3	SRR5011170	SAMN06010016	col-0	SINGLE 76bp	10day	Col_K9_rep2	POWERDRESS-mediated histone deacetylation is essential for thermomorphogenesis in Arabidopsis thaliana
input	SRR13521617		C24	paired 150bp		input-control
H3K18ac	SRR13521628		C24	paired 150bp		H3K18ac ChIP-Seq of C24 rep2
H3K18ac	SRR13521629		C24	paired 150bp		H3K18ac ChIP-Seq of C24 rep1
H3K9ac_2	SRR8955181	SAMN11505440	C24	single 51bp	10day	WT_H3K9Ac	Peroxisomal ß-oxidation regulates histone acetylation and DNA methylation in Arabidopsis
input	SRR8955188	SAMN11505480	C24	single 51bp	10day	WT_H3K9Ac-input	Peroxisomal ß-oxidation regulates histone acetylation and DNA methylation in Arabidopsis
H3K14ac_2	SRR8955182	SAMN11505439	C24	single 51bp	10day	WT_H3K14Ac_rep1	Peroxisomal ß-oxidation regulates histone acetylation and DNA methylation in Arabidopsis
H3K14ac_2	SRR8955183	SAMN11505438	C24	single 51bp	10day	WT_H3K14Ac_rep2	Peroxisomal ß-oxidation regulates histone acetylation and DNA methylation in Arabidopsis
input	SRR8955190	SAMN11505478	C24	single 51bp	10day	WT_H3K14Ac_rep2-input	Peroxisomal ß-oxidation regulates histone acetylation and DNA methylation in Arabidopsis
input	SRR8955189	SAMN11505479	C24	single 51bp	10day	WT_H3K14Ac_H3K18Ac_rep1-input and H3K23Ac_rep2-input	Peroxisomal ß-oxidation regulates histone acetylation and DNA methylation in Arabidopsis
H3K18ac_2	SRR8955184	SAMN11505437	C24	single 51bp	10day	WT_H3K18Ac_rep1	Peroxisomal ß-oxidation regulates histone acetylation and DNA methylation in Arabidopsis
H3K18ac_2	SRR8955185	SAMN11505436	C24	single 51bp	10day	WT_H3K18Ac_rep2	Peroxisomal ß-oxidation regulates histone acetylation and DNA methylation in Arabidopsis
input	SRR8955191	SAMN11505477	C24	single 51bp	10day	WT_H3K18Ac_rep2-input	Peroxisomal ß-oxidation regulates histone acetylation and DNA methylation in Arabidopsis
H3K23ac	SRR8955186	SAMN11505435	C24	single 51bp	10day	WT_H3K23Ac_rep1	Peroxisomal ß-oxidation regulates histone acetylation and DNA methylation in Arabidopsis
H3K23ac	SRR8955187	SAMN11505481	C24	single 51bp	10day	WT_H3K23Ac_rep2	Peroxisomal ß-oxidation regulates histone acetylation and DNA methylation in Arabidopsis
input	SRR8955192	SAMN11505476	C24	single 51bp	10day	WT_H3K23Ac_rep1-input	Peroxisomal ß-oxidation regulates histone acetylation and DNA methylation in Arabidopsis
H3K56ac	SRR7426135	SAMN09501247	col-0	paired 100bp	7days	cell culture, H3K56ac ChIP, biorep1
H3K56ac	SRR7426136	SAMN09501247	col-0	paired 100bp	7days	cell culture, H3K56ac ChIP, biorep3
H3K56ac	SRR7426137	SAMN07682426	col-0	paired 100bp	7days	Input
H3K56ac	SRR7426138	SAMN09501247	col-0	paired 100bp	7days	Col-0, cell culture, H3K56ac ChIP, biorep2
H3K56ac	SRR7426139	SAMN09501247	col-0	paired 100bp	7days	Col-0, cell culture, H3K56ac ChIP, biorep4
H3K9ac	SRR3286786	SAMN04576247	col-0	single 51bp	12days	H3K9ac rep2	Cytosolic acetyl-CoA promotes histone acetylation predominantly at H3K27 in Arabidopsis
H3K14ac	SRR3286787	SAMN04576248	col-0	single 51bp	12days	H3K14ac	Cytosolic acetyl-CoA promotes histone acetylation predominantly at H3K28 in Arabidopsis
H3K18ac	SRR3286788	SAMN04576249	col-0	single 51bp	12days	H3K18ac	Cytosolic acetyl-CoA promotes histone acetylation predominantly at H3K29 in Arabidopsis
H4K5ac	SRR3286789	SAMN04576250	col-0	single 51bp	12days	H4K5ac	Cytosolic acetyl-CoA promotes histone acetylation predominantly at H3K30 in Arabidopsis
H4K8ac	SRR3286790	SAMN04576251	col-0	single 51bp	12days	H4K8ac	Cytosolic acetyl-CoA promotes histone acetylation predominantly at H3K31 in Arabidopsis
H4K12ac	SRR3286791	SAMN04576252	col-0	single 51bp	12days	H4K12ac	Cytosolic acetyl-CoA promotes histone acetylation predominantly at H3K32 in Arabidopsis
H4K16ac	SRR3286792	SAMN04576253	col-0	single 51bp	12days	H4K16ac	Cytosolic acetyl-CoA promotes histone acetylation predominantly at H3K33 in Arabidopsis
input	SRR3286801	SAMN04576262	col-0	single 51bp	12days	WT input	Cytosolic acetyl-CoA promotes histone acetylation predominantly at H3K34 in Arabidopsis
H3K9ac	SRR5224475	SAMN06290527	col-0	single 51bp	12days	H3K9ac	Cytosolic acetyl-CoA promotes histone acetylation predominantly at H3K35 in Arabidopsis
H3K14ac	SRR5224476	SAMN06290528	col-0	single 51bp	12days	H3K14ac	Cytosolic acetyl-CoA promotes histone acetylation predominantly at H3K36 in Arabidopsis
H3K18ac	SRR5224477	SAMN06290529	col-0	single 51bp	12days	H3K18ac	Cytosolic acetyl-CoA promotes histone acetylation predominantly at H3K37 in Arabidopsis
H4K5ac	SRR5224478	SAMN06290530	col-0	single 51bp	12days	H4K5ac rep1	Cytosolic acetyl-CoA promotes histone acetylation predominantly at H3K38 in Arabidopsis
H4K8ac	SRR5224479	SAMN06290531	col-0	single 51bp	12days	H4K8ac	Cytosolic acetyl-CoA promotes histone acetylation predominantly at H3K39 in Arabidopsis
H4K12ac	SRR5224480	SAMN06290532	col-0	single 51bp	12days	H4K12ac	Cytosolic acetyl-CoA promotes histone acetylation predominantly at H3K40 in Arabidopsis
H4K16ac	SRR5224481	SAMN06290533	col-0	single 51bp	12days	H4K16ac rep1	Cytosolic acetyl-CoA promotes histone acetylation predominantly at H3K41 in Arabidopsis
H3K36ac	SRR12228198	SAMN15543005	col-0	paired 150bp	21days	H3K36ac rep1	H3.1K27me1 maintains transcriptional silencing and genome stability by preventing GCN5-mediated histone acetylation
H3K36ac	SRR12228199	SAMN15543004	col-0	paired 150bp	21days	H3K36ac rep2	H3.1K27me1 maintains transcriptional silencing and genome stability by preventing GCN6-mediated histone acetylation
H2AK121ub	SRR12265318	SAMN15579729	col-0	paired 150bp	10day	input_col0	H2AK121ub in Arabidopsis associates with a less accessible chromatin state at transcriptional regulation hotspots
H2AK121ub	SRR12265319	SAMN15579743	col-0	paired 150bp	10day	h2aub_col0_1	H2AK121ub in Arabidopsis associates with a less accessible chromatin state at transcriptional regulation hotspots
H2AK121ub	SRR12265320	SAMN15579742	col-0	paired 150bp	10day	h2aub_col0_2	H2AK121ub in Arabidopsis associates with a less accessible chromatin state at transcriptional regulation hotspots
input	SRR11780929	SAMN14907137	col-0	single 51bp	4-5 week	Col_Input_set2_Rep1	ChIP-seq for Histone Variant H2A.W, H2A.X, H1 and H3K9me2 in WT and ddm1(-/-) to quantify loss of H2A.W in ddm1 1st generation
H1	SRR11780929	SAMN14907137	col-0	single 51bp	4-5 week	Col_Input_set2_Rep1	ChIP-seq for Histone Variant H2A.W, H2A.X, H1 and H3K9me2 in WT and ddm1(-/-) to quantify loss of H2A.W in ddm1 1st generation
H1	SRR11780933	SAMN14907131	col-0	single 51bp	4-5 week	Col_Input_set2_Rep2	ChIP-seq for Histone Variant H2A.W, H2A.X, H1 and H3K9me2 in WT and ddm1(-/-) to quantify loss of H2A.W in ddm1 1st generation
H1	SRR11780934	SAMN14907129	col-0	single 51bp	4-5 week	Col_H1_set2_Rep2	ChIP-seq for Histone Variant H2A.W, H2A.X, H1 and H3K9me2 in WT and ddm1(-/-) to quantify loss of H2A.W in ddm1 1st generation
H1	SRR11780930	SAMN14907136	col-0	single 51bp	4-5 week	Col_H1_set2_Rep1	ChIP-seq for Histone Variant H2A.W, H2A.X, H1 and H3K9me2 in WT and ddm1(-/-) to quantify loss of H2A.W in ddm1 1st generation
input	SRR11304846	SAMN14374734	col-0	SINGLE 76	10day	WT input rep 1	The histone variant H2A.W and linker histone H1 co-regulate heterochromatin accessibility and DNA methylation
input	SRR11304847	SAMN14374733	col-0	SINGLE 76	10day	WT input rep 2	The histone variant H2A.W and linker histone H1 co-regulate heterochromatin accessibility and DNA methylation
H3K9me1	SRR11304840	SAMN14374675	col-0	SINGLE 76	10day	H3K9me1 ChIP-seq rep 1	The histone variant H2A.W and linker histone H1 co-regulate heterochromatin accessibility and DNA methylation
H3K9me1	SRR11304841	SAMN14374674	col-0	SINGLE 76	10day	H3K9me1 ChIP-seq rep 2	The histone variant H2A.W and linker histone H1 co-regulate heterochromatin accessibility and DNA methylation
Dnase-seq	SRR11144416	SAMN14162597	col-0	single 51bp	10day	Control_D_R1	Abiotic stress-mediated modulation of the chromatin landscape in Arabidopsis thaliana
Dnase-seq	SRR11144417	SAMN14162594	col-0	single 51bp	10day	Control_D_R2	Abiotic stress-mediated modulation of the chromatin landscape in Arabidopsis thaliana
Dnase-seq	SRR11144418	SAMN14162592	col-0	single 51bp	10day	Control_D_R3	Abiotic stress-mediated modulation of the chromatin landscape in Arabidopsis thaliana
FAIRE-seq	SRR11144419	SAMN14162589	col-0	single 51bp	10day	Control_F_R1	Abiotic stress-mediated modulation of the chromatin landscape in Arabidopsis thaliana
FAIRE-seq	SRR11144420	SAMN14162588	col-0	single 51bp	10day	Control_F_R2	Abiotic stress-mediated modulation of the chromatin landscape in Arabidopsis thaliana
input	SRR13355100	SAMN17213395	col-0	single 100bp	4-5 Weeks	Col0 Input Rep2	The chromatin remodeler DDM1 prevents transposon mobility through deposition of histone variant H7A.W
H3	SRR13355101	SAMN17213396	col-0	single 100bp	4-5 Weeks	Col0 H3 Rep2	The chromatin remodeler DDM1 prevents transposon mobility through deposition of histone variant H8A.W
H1	SRR13355102	SAMN17213397	col-0	single 100bp	4-5 Weeks	Col0 H1 Rep2	The chromatin remodeler DDM1 prevents transposon mobility through deposition of histone variant H9A.W
H3K9me2	SRR13355103	SAMN17213398	col-0	single 100bp	4-5 Weeks	Col0 H3K9me2 Rep2	The chromatin remodeler DDM1 prevents transposon mobility through deposition of histone variant H10A.W
H1	SRR13355114	SAMN17213361	col-0	single 100bp	4-5 Weeks	Col0 H1 Rep1	The chromatin remodeler DDM1 prevents transposon mobility through deposition of histone variant H12A.W
H3K9me2	SRR13355131	SAMN17213362	col-0	single 100bp	4-5 Weeks	Col0 H3K9me2 Rep1	The chromatin remodeler DDM1 prevents transposon mobility through deposition of histone variant H14A.W
input	SRR13355140	SAMN17213359	col-0	single 100bp	4-5 Weeks	Col0 Input Rep1	The chromatin remodeler DDM1 prevents transposon mobility through deposition of histone variant H15A.W
H3	SRR13355141	SAMN17213360	col-0	single 100bp	4-5 Weeks	Col0 H3 Rep1	The chromatin remodeler DDM1 prevents transposon mobility through deposition of histone variant H16A.W
input	SRR10905145	SAMN13874302	col-0	single 51bp	8day	col_input_ChIPseq	The characterization of Mediator12 and 13 as conditional positive gene regulators in Arabidopsis
H3K36me3	SRR10905143	SAMN13874304	col-0	single 51bp	8day	col_H3K36me3_ChIPseq	The characterization of Mediator12 and 15 as conditional positive gene regulators in Arabidopsis
H3K36me3_2	SRR7264165	SAMN09370226	col-0	PAIRED 100bp	14days	H3K36me3 ChIP_rep 2	The Role of Histone Methyltransferase SDG9 in Nitrate Signaling
input	SRR7264166	SAMN09370226	col-0	PAIRED 100bp	14days	Input DNA_rep 2	The Role of Histone Methyltransferase SDG10 in Nitrate Signaling
H3K36me3_2	SRR7264157	SAMN09370226	col-0	PAIRED 76bp	14days	H3K36me3 ChIP_rep 1	The Role of Histone Methyltransferase SDG8 in Nitrate Signaling
input	SRR7264158	SAMN09370226	col-0	PAIRED 76bp	14days	Input DNA_rep 1	The Role of Histone Methyltransferase SDG11 in Nitrate Signaling
input	SRR6923481	SAMN08826603	col-0	single 76bp	22days	input_12_WT_rep1	Causes and consequences of Pol II read-through in Arabidopsis
input	SRR6923480	SAMN08826604	col-0	single 76bp	22days	input_12_WT_rep2	Causes and consequences of Pol II read-through in Arabidopsis
input	SRR6923463	SAMN08826605	col-0	single 76bp	22days	input_12_WT_rep3	Causes and consequences of Pol II read-through in Arabidopsis
H3K36me3	SRR6923453	SAMN08826603	col-0	single 76bp	22days	H3K36me3_10_WT_rep1	Causes and consequences of Pol II read-through in Arabidopsis
H3K36me3	SRR6923451	SAMN08826605	col-0	single 76bp	22days	H3K36me3_10_WT_rep2	Causes and consequences of Pol II read-through in Arabidopsis
H3K36me3	SRR6923450	SAMN08826604	col-0	single 76bp	22days	H3K36me3_10_WT_rep3	Causes and consequences of Pol II read-through in Arabidopsis
MNase-Seq	SRR10753561	SAMN13668202		PAIRED 150	12days	MH-seq replicate 2	Genome-wide MNase hypersensitivity assay unveils distinct classes of open chromatin associated with H3K27me3 and DNA methylation in Arabidopsis thaliana
MNase-Seq	SRR10753562	SAMN13668202		PAIRED 150	12days	MH-seq replicate 1	Genome-wide MNase hypersensitivity assay unveils distinct classes of open chromatin associated with H3K27me4 and DNA methylation in Arabidopsis thaliana
Transposase Hypersensitive Sites (THS)							Chromatin changes in lateral organ founder cells of Arabidopsis thaliana detected by assay for transposase-accessible chromatin sequencing (ATAC-seq) (thale cress)
TFBS							http://www.athamap.de/index.php
