# Supplementary material for: Genome-wide identification of silencers and their regulatory mechanism in gene transcription in Arabidopsis
Source: Research Square preprint supplement (doi:10.21203/rs.3.rs-5559292/v1), 2025-01-13
Supplement: Supplementary file 3 [file 9247752f47b62c1f24630939.xlsx]

## Sheet: Sheet1
Supplementary Table 1 Sequencing statistics for silencer identification
Liberary name	Number of pairded reads	Length of reads (bp)	Mapping rate(%)	Segment size (bp)	Unique segment number	Developmental stages
STARR-seq cDNA replicate 1	102571142	150	77.75	450	32695199	14 day
STARR-seq cDNA replicate 2	113575460	150	76.09	450	33398096	14 day
Input replicate 1	109965438	150	93.29	450	46241057	14 day
Input replicate 2	118076085	150	93.31	450	48561251	14 day
STARR-seq cDNA replicate 1	112759123	150	78.34	450	38030831	28 day
STARR-seq cDNA replicate 2	119753933	150	78.94	450	42303807	28 day
Input replicate 1	108115879	150	93.21	450	50693313	28 day
Input replicate 2	114552174	150	93.25	450	53044822	28 day
