# Supplementary material for: Genome-wide identification of silencers and their regulatory mechanism in gene transcription in Arabidopsis
Source: Research Square preprint supplement (doi:10.21203/rs.3.rs-5559292/v1), 2025-01-13
Supplement: Supplementary file 4 [file a0b9c2ecc1d59fb20d63f1f0.xlsx]

## Sheet: Sheet1
Supplementary Table 4 Primer for the validation of silencers
Primer name	Sequence	strand	Length	Silencer name	local
ns30f	AGCACCATGTCATCACGGTC	Plus	20	AtSi2760	3'-UTR
ns30r	TGTTGGTGTGTGTAATGCGTG	Minus	21		3'-UTR
ns31f	GCGTGTGCTTTGTGAAGAACT	Plus	21	AtSi524	3'-UTR
ns31r	TGGTTGATAAGCATCGCCACA	Minus	21		3'-UTR
ns32f	GCTGTTCAAGTTTGGGGCAG	Plus	20	AtSi4361	3'-UTR
ns32r	AAATGAGCCTCTGAAGCCGT	Minus	20		3'-UTR
ns33f	AAACGGGAGGGACAGTTTGG	Plus	20	AtSi4743	3'-UTR
ns33r	TCATCATCTCAGCCATCGCC	Minus	20		3'-UTR
ns34f	AGAATTCACAACAGGAGTGGCT	Plus	22	AtSi7220	3'-UTR
ns34r	GTTCGAACCGGAGACCTTCA	Minus	20		3'-UTR
ns35f	ACTGCACTGCACTACTGGAA	Plus	20	AtSi7515	3'-UTR
ns35r	AGCACGAGTCATGTGCAGAA	Minus	20		3'-UTR
ns36f	TGAGCAGGAAGGCAACCAAA	Plus	20	AtSi5884	3'-UTR
ns36r	TGGGGTCAAATATGTGGACTGT	Minus	22		3'-UTR
ns37f	TACGTAGCTCAAGGGACCCA	Plus	20	AtSi5895	3'-UTR
ns37r	CCACTATGCATGGGGTGTGA	Minus	20		3'-UTR
ns38f	TGTATCCAAGGCTGGTCTAACG	Plus	22	AtSi5962	3'-UTR
ns38r	GGTTGACATGCCTGATTTGGG	Minus	21		3'-UTR
ns39f	TCTTGGCTTCTTGTGACGGG	Plus	20	AtSi6127	3'-UTR
ns39r	ATTTCCCAAAATGCACGCGA	Minus	20		3'-UTR
ns44f	AAGCTTTCTCGCTGCATGTC	Plus	20	AtSi10325	3'-UTR
ns44r	TCTCCGTTGCTTAGAACATTTGC	Minus	23		3'-UTR
ns45f	GAGTGGTTCGAGTTGGGGAG	Plus	20	AtSi11842	3'-UTR
ns45r	AGCGTGACGGATCATTTGGT	Minus	20		3'-UTR
ns46f	GCATTATAATCCAAGCCACACCA	Plus	23	AtSi12118	3'-UTR
ns46r	TGATCGTGAGCTTAGGCCTTC	Minus	21		3'-UTR
ns47f	GCGATTGAATTACACGTGCCT	Plus	21	AtSi12855	3'-UTR
ns47r	ATCGTATCACACATGGCCCTT	Minus	21		3'-UTR
ns48f	TCGAGTCACTCTCCAAATCGC	Plus	21	AtSi10574	3'-UTR
ns48r	GTCTGCATAGGCTCTGATCGT	Minus	21		3'-UTR
ns49f	AGGAGAGGCAGTTTCATGCT	Plus	20	AtSi10760	3'-UTR
ns49r	CCTTTTGTCACAACGATCGCA	Minus	21		3'-UTR
ns50f	CTCAGTACTTGGGTTGGGTACA	Plus	22	AtSi113	5'-UTR
ns50r	GTCTTCCGCTCTGCAACTCT	Minus	20		5'-UTR
ns51f	GTGGTGCACTAGGTGTAGGC	Plus	20	AtSi1869	5'-UTR
ns51r	AACCGGTGAATACGGGGAAC	Minus	20		5'-UTR
ns52f	TCACCTACACTCAACACGACG	Plus	21	AtSi2164	5'-UTR
ns52r	GTTCCATTGTGTAGGGTGGCT	Minus	21		5'-UTR
ns53f	TAAGCCCAAGAAGAGCACCC	Plus	20	AtSi2786	5'-UTR
ns53r	TATGGACATGTGGCTCGCAC	Minus	20		5'-UTR
ns54f	AAACGGCTCGGATTTGACGA	Plus	20	AtSi2831	5'-UTR
ns54r	GAGTTGGGCTGCACGAAAAT	Minus	20		5'-UTR
ns55f	TGTTGTTGTGTGAATGCGGTT	Plus	21	AtSi3140	5'-UTR
ns55r	AGACCACGCGTCCGTTTATT	Minus	20		5'-UTR
ns58f	ACCAAGCTGCATGAGAGACA	Plus	20	AtSi4686	5'-UTR
ns58r	CGGCATGAGGTGGAAGATCA	Minus	20		5'-UTR
ns59f	GAGAGTGGCTACGAACTCGG	Plus	20	AtSi4795	5'-UTR
ns59r	AACAACCATAAGCCTACCAAAAGG	Minus	24		5'-UTR
ns61f	TCAGGACATAAGCGAAATCCGA	Plus	22	AtSi9441	5'-UTR
ns61r	CGGATTCACCGTTGCATAGC	Minus	20		5'-UTR
ns63f	GGTGACCGCGCGTTTTTATT	Plus	20	AtSi9140	5'-UTR
ns63r	CGCCTCCCAAAAGAAACACCT	Minus	21		5'-UTR
ns65f	AACGCGGAACGCCATTTTAG	Plus	20	AtSi12735	5'-UTR
ns65r	GACGTGGAGAAACCATCGGA	Minus	20		5'-UTR
ns66f	TCCTTTGTCCAATCATTGACCTCT	Plus	24	AtSi12916	5'-UTR
ns66r	AGTTGGTGCCGGTATGTTGA	Minus	20		5'-UTR
ns67f	GATATGCTTCCAACACGGCG	Plus	20	AtSi12980	5'-UTR
ns67r	TATCTCTCCGTTGACAGGCG	Minus	20		5'-UTR
ns68f	ATGGTGGAAGGAAAAGGCGT	Plus	20	AtSi10665	5'-UTR
ns68r	GTCCACCTGAATTGAGGCCA	Minus	20		5'-UTR
ns69f	TTGGCAAAGCAATGGACACAT	Plus	21	AtSi1311	TE
ns69r	AGTGCGGCTATGGAGTTGTC	Minus	20		TE
ns70f	AGTTGGACGTTTGGACGTCTT	Plus	21	AtSi1894	TE
ns70r	GGTTTCAAAGGATTGCCGGT	Minus	20		TE
ns71f	GGGAATGTGGTTGGTCACGA	Plus	20	AtSi2176	TE
ns71r	GCGCTGAATAGAAAGGGATGC	Minus	21		TE
ns72f	AGAAAAATGTGGCCAGATCCAGA	Plus	23	AtSi2810	TE
ns72r	AACGTCGTCGTTTTGAGTGTT	Minus	21		TE
ns73f	TCTTGTGTTGTGAAGTGACGGT	Plus	22	AtSi1044	TE
ns73r	AGATCGAGGAATGCGATGGTC	Minus	21		TE
ns74f	AGAGGTTACAACGGCTGCTC	Plus	20	AtSi3367	TE
ns74r	ATTTTTCTCGCCCACCCTGA	Minus	20		TE
ns75f	TGTCCGTTGCTTTCTTTCATGT	Plus	22	AtSi3878	TE
ns75r	CTGCTTTCGAGCCCTTTTCG	Minus	20		TE
ns76f	CCTGATACGTATTGAAACTTGAGGG	Plus	25	AtSi5536	TE
ns76r	CCCAATCCGACCCCTAACAAA	Minus	21		TE
ns77f	AGTCTGTTCACATGGCTCTGTA	Plus	22	AtSi9287	TE
ns77r	CTCTTCTGCTGGTTCCTCCC	Minus	20		TE
ns78f	ATACCCATGGATCTTGGGCG	Plus	20	AtSi8731	TE
ns78r	GGAAAAGAGTTCGGCTACGGT	Minus	21		TE
ns79f	TTGCCGCCTTGAGTGGATAG	Plus	20	AtSi11337	TE
ns79r	CAGGCGATGAGTCGTGTGAT	Minus	20		TE
ns80f	TGCGGTATTGGACGTGAGTC	Plus	20	AtSi10364	TE
ns80r	TCCACGGGCAACAAGAAGAA	Minus	20		TE
ns81f	ACGAGTCCAAATGAGCTGGG	Plus	20	AtSi1042	TE
ns81r	TCCACGTGGCGTCTTTGTAG	Minus	20		TE
ns82f	CGTCCCTCTCCACTTGCATA	Plus	20	AtSi10982	TE
ns82r	CCCTCCATATATCAGTCAGCCC	Minus	22		TE
ns83f	GCGTGAAACAGGCTTAGCAA	Plus	20	AtSi11073	TE
ns83r	ATCTCGTCAGGCCCAAAAGG	Minus	20		TE
ns84f	CGGTAATGTTCGGCTCGGTT	Plus	20	AtSi11108	TE
ns84r	GGTTCGGTTTATTCTTGCAAACG	Minus	23		TE
s10766f	ACACACGAGGCACAAAGgtt	Minus	20	AtSi10766	other
s10766r	TCTTTTGGCAATGGGGGaca	Plus	20		other
s10871f	GACAGCCAAAAAGGTGCTTCA	Plus	21	AtSi10871	5'-UTR
s10871r	CCAACGCTTACGTTCGTTCC	Minus	20		5'-UTR
s11289f	TTGACATTTCGTTTCTTCGGACT	Plus	23	AtSi11289	3'-UTR
s11289r	ACAAGAGGCATGAAACGGCA	Minus	20		3'-UTR
s11964f	AGCTCACGAATCTCTCATGTT	Plus	21	AtSi11964	3'-UTR
s11964r	TGGTAGTGAGAAGGGAGTGGA	Minus	21		3'-UTR
s12332f	AAGGCTAAAAACGATTTCCACA	Plus	22	AtSi12332	3'-UTR
s12332r	ACCTACACAAGGGAATGTGCT	Minus	21		3'-UTR
s12537f	CGGTTAGGGTTAGGGTTCCG	Plus	20	AtSi12537	5'-UTR
s12537r	TTGGCGGTTTAGGAATCGCA	Minus	20		5'-UTR
s2517f	TTGTTGACAGGCTGCGGTAA	Minus	20	AtSi2517	other
s2517r	TAGAAGCAAGTGGGTCGTGG	Plus	20		other
s2824f	GGGCCGTTGTACCTTCTGTT	Plus	20	AtSi2824	3'-UTR
s2824r	AACGACTGGTTGGTTCCGTG	Minus	20		3'-UTR
s3012f	ACGGCATAAGTCAACTGCGA	Plus	20	AtSi3012	3'-UTR
s3012r	CCCTTCATGCATGCAAATCAGT	Minus	22		3'-UTR
s86f	ACGACACAAACCAGAGAGGA	Plus	20	AtSi86	5'-UTR
s86r	CCCTTTGGGGGAGAGATGTG	Minus	20		5'-UTR
s3930f	ACAACACATCGTCGCTTTTCA	Plus	21	AtSi3930	3'-UTR
s3930r	AGAATTTCGATCTACGAGAGCA	Minus	22		3'-UTR
s4141f	ATGAGGAGGACTTTGGTCGC	Plus	20	AtSi4141	3'-UTR
s4141r	GCTGCATTATGACGGCAGAG	Minus	20		3'-UTR
s5002f	TGCATCCAAGGACAAGAAGGA	Plus	21	AtSi5002	5'-UTR
s5002r	TCGGAATCGCAAACACCTGA	Minus	20		5'-UTR
s5655f	CTGCAGAGTAGGAAGGCTCA	Plus	20	AtSi5655	3'-UTR
s5655r	AGGTCATGCCGTCGGAGATA	Minus	20		3'-UTR
s6195f	CGAAGATCTGGACCTTTTGgg	Minus	21	AtSi6195	other
s6195r	ATGGGAACTCACGTCCTcgt	Plus	20		other
s6478f	AAGGAACGCTAGGCGTTTGA	Plus	20	AtSi6478	5'-UTR
s6478r	GCCGTTTCAACTCCAAAGCA	Minus	20		5'-UTR
s8032r	TGTTTTCTCAGTTGCCGTGT	Minus	20		3'-UTR
s8032r	GGGCTTTAGAAGGCCCACA	Minus	19		5'-UTR
s9735f	TGGAGCAAAAACATGCGTGG	Plus	20	AtSi9735	5'-UTR
s9735r	ACGCTAACAGCCGTATAGGAG	Minus	21		5'-UTR
s9909f	TTCTGGTTTGGTTTGCGCTG	Plus	20	AtSi9909	3'-UTR
s9909r	ATCCAGTGGACCAAACCGTC	Minus	20		3'-UTR
s7546f	CGCTATCGTCAGCCATGgaa	Minus	20	AtSi7546	other
s7546r	CCTTCAGCTTCCGCAAAacc	Plus	20		other
s7917f	CGTGTTGGGCTCTGTTTgga	Minus	20	AtSi7917	other
s7917r	GCCGGCCCTGACCATTTatt	Plus	20		other
s8032f	ATCTCCGGTCGTCATGCTTC	Plus	20	AtSi8032	3'-UTR
s8032f	ACGACGGTTCAATTCGGAGA	Plus	20	AtSi8032	5'-UTR
ns42r	CGGTCATGCATTGCTTAGCTT	Minus	21		3'-UTR
ns43f	CCGGCGAGACAACTACTACA	Plus	20	AtSi9799	3'-UTR
ns43r	TCTGTTCTGACAGCCAACAGT	Minus	21		3'-UTR
ns56f	GAGGGGTCTGCTTGAACGAA	Plus	20	AtSi3164	5'-UTR
ns56r	ATGGTTAGCTTGGGCGTTGA	Minus	20		5'-UTR
ns57f	CACGTTAGCCACCGTGAGAG	Plus	20	AtSi381	5'-UTR
ns57r	AGTTTGGCTTGGCGTGATTTT	Minus	21		5'-UTR
s9813f	AGCAATTCACTCATTCAGCagc	Minus	22	AtSi9813	other
s9813r	TCAGACATTTACACTCCCATacg	Plus	23		other
s9154f	TAGGCACCAATTACGGCgtt	Minus	20	AtSi9154	other
s9154r	TGACAAATGCGAAGGGGaca	Plus	20		other
s963f	AGGAGGACGAGGAGGAGAAG	Plus	20	AtSi963	5'-UTR
s963r	ACGATGATGATGACGGTGTGA	Minus	21		5'-UTR
s5308f	TGCATCAGCTGTCACTCCTC	Plus	20	AtSi5308	5'-UTR
s5308r	GAGGAGACGGCCTTAAGTGG	Minus	20		5'-UTR
s12718f	TGAGACACAGTTGATGCAGAgat	Minus	23	AtSi12718	other
s12718r	AAGGCCTAGGGACAATGagg	Plus	20		other
ns60f	ACTCCGAGATTCGCTCCGTA	Plus	20	AtSi7918	5'-UTR
ns60r	GACGCTGTGAATGTGATTAGGC	Minus	22		5'-UTR
ns62f	TAACCTGATCGAACGGCTGC	Plus	20	AtSi10131	5'-UTR
ns62r	ACGATCCGGAACCGTCAAAA	Minus	20		5'-UTR
ns64f	GCGCTAGCTCGTCATGTACT	Plus	20	AtSi12654	5'-UTR
ns64r	AATTACAGCCAAAGCCCCGT	Minus	20		5'-UTR
