# Supplementary material for: Genome-wide identification of silencers and their regulatory mechanism in gene transcription in Arabidopsis
Source: Research Square preprint supplement (doi:10.21203/rs.3.rs-5559292/v1), 2025-01-13
Supplement: Supplementary file 5 [file a11daf168ef960fb7b72f4c8.xlsx]

## Sheet: AtSI14C_merge_0.8fold
Supplementary Table 2 Silencers identified from Arabidopsis genome
14-day-old leaves									28-day-old leaves
chr	start	end	length	sampleCov	controlCov	Pvalue	enrichment	adjustedPvalue	chr	start	end	length	sampleCov	controlCov	Pvalue	enrichment	adjustedPvalue(BH)
1	38069	38668	599	42	426	3.89124e-101	0.174936	2.14813e-98	1	38066	38665	599	55	403	1.4097e-96	0.210089	5.16595e-94
1	44005	44604	599	20	207	2.45212e-50	0.206367	5.43227e-49	1	49787	50386	599	38	368	3.00404e-99	0.168943	1.23873e-96
1	49796	50395	599	39	332	1.33968e-73	0.213694	1.56526e-71	1	62505	63104	599	44	267	1.49147e-58	0.268197	6.30843e-57
1	59485	60084	599	16	241	1.02474e-65	0.1482	6.77093e-64	1	89469	90068	599	107	531	6.59473e-101	0.283256	2.91207e-98
1	89666	90265	599	188	610	2.76988e-62	0.455837	1.42684e-60	1	111772	112371	599	50	319	1.34816e-71	0.247624	1.28091e-69
1	100238	100837	599	27	288	3.2898e-70	0.183786	3.01113e-68	1	115817	116416	599	44	344	3.44351e-85	0.205126	7.21952e-83
1	104255	104854	599	47	382	1.22596e-82	0.21573	2.65185e-80	1	135005	135604	599	74	415	6.21365e-86	0.263856	1.35513e-83
1	107014	107613	599	16	262	7.28411e-73	0.135596	8.06778e-71	1	142977	143576	599	34	307	6.58239e-81	0.18654	1.08712e-78
1	111772	112371	599	20	327	1.56121e-90	0.126933	5.32538e-88	1	158628	159227	599	50	273	3.60229e-56	0.29201	1.31474e-54
1	134962	135561	599	96	408	5.59527e-57	0.375936	1.97096e-55	1	166063	166662	599	91	490	1.46474e-98	0.266376	5.86556e-96
1	143007	143606	599	27	319	2.02254e-80	0.164945	3.79147e-78	1	168414	169013	599	35	272	1.59884e-67	0.217194	1.18233e-65
1	158626	159225	599	33	284	1.67372e-63	0.219506	9.40874e-62	1	223155	223754	599	116	551	2.29699e-101	0.293175	1.03445e-98
1	166061	166660	599	76	463	3.87964e-85	0.26748	9.81176e-83	1	225504	226103	599	61	448	2.74886e-107	0.205637	1.54671e-104
1	168415	169014	599	33	297	1.20083e-67	0.209342	9.13252e-66	1	228512	229111	599	96	482	1.61654e-92	0.284283	4.89986e-90
1	178231	178830	599	16	237	2.32553e-64	0.150867	1.39274e-62	1	242546	243145	599	64	445	9.08918e-104	0.215927	4.50187e-101
1	198472	199071	599	32	323	6.18335e-77	0.186798	9.15346e-75	1	254324	254923	599	55	357	1.14067e-80	0.23865	1.8573e-78
1	225477	226076	599	55	409	1.52213e-84	0.229714	3.71342e-82	1	261361	261960	599	14	250	1.40364e-80	0.116366	2.27596e-78
1	228237	228836	599	35	373	1.98795e-90	0.172771	6.74707e-88	1	266686	267285	599	152	524	1.83842e-72	0.395308	1.842e-70
1	242546	243145	599	53	419	2.80598e-89	0.216939	8.95875e-87	1	269459	270058	599	150	588	3.77102e-92	0.346324	1.12363e-89
1	254324	254923	599	49	371	1.47088e-77	0.230502	2.27084e-75	1	274651	275250	599	30	315	1.20559e-87	0.163877	2.87187e-85
1	261310	261909	599	27	287	6.98985e-70	0.184465	6.24916e-68	1	283897	284496	599	76	396	2.77966e-78	0.28376	3.94286e-76
1	265927	266526	599	22	295	1.62186e-77	0.152379	2.49971e-75	1	287781	288380	599	187	492	3.11896e-48	0.511099	6.96861e-47
1	266673	267272	599	139	521	1.34982e-63	0.406907	7.64379e-62	1	303848	304447	599	171	601	1.48274e-84	0.3819	3.00305e-82
1	269459	270058	599	101	602	1.28231e-108	0.262024	8.89421e-106	1	339942	340541	599	60	354	7.68532e-76	0.259598	9.42227e-74
1	274652	275251	599	27	303	3.90306e-75	0.174168	5.08026e-73	1	344034	344633	599	81	383	9.1294e-71	0.310935	8.25383e-69
1	287760	288359	599	171	491	2.24014e-42	0.52365	2.92953e-41	1	354825	355424	599	75	473	1.15758e-104	0.232799	5.93136e-102
1	295701	296300	599	28	323	9.36644e-81	0.167614	1.79648e-78	1	386516	387115	599	83	403	7.96816e-76	0.30119	9.76274e-74
1	298081	298680	599	19	268	1.32288e-71	0.150658	1.33972e-69	1	399637	400236	599	91	623	1.97849e-143	0.207375	2.36898e-140
1	303115	303714	599	23	287	8.27435e-74	0.162434	9.80809e-72	1	428353	428952	599	51	342	1.09778e-78	0.234012	1.59337e-76
1	342857	343456	599	127	536	8.36248e-74	0.363806	9.90939e-72	1	431247	431846	599	45	352	3.75521e-87	0.204058	8.72819e-85
1	352329	352928	599	19	265	1.35759e-70	0.15247	1.27781e-68	1	455332	455931	599	38	279	1.9369e-67	0.226343	1.42605e-65
1	354823	355422	599	38	404	1.01371e-97	0.17008	4.90205e-95	1	457757	458356	599	38	325	1.00463e-83	0.192588	1.94321e-81
1	368299	368898	599	18	283	8.85969e-78	0.136475	1.38854e-75	1	458995	459594	599	55	347	2.92762e-77	0.245902	3.8994e-75
1	371112	371711	599	73	374	2.68242e-61	0.322961	1.28632e-59	1	466014	466613	599	102	367	1.31349e-53	0.399552	4.09163e-52
1	373078	373677	599	83	430	8.25557e-71	0.312472	7.88521e-69	1	470013	470612	599	73	414	2.52353e-86	0.261373	5.61789e-84
1	399716	400315	599	51	486	2.58007e-112	0.179697	1.9546e-109	1	490292	490891	599	67	386	2.22777e-81	0.260922	3.78086e-79
1	428345	428944	599	40	334	2.2076e-73	0.216888	2.53732e-71	1	515238	515837	599	36	314	1.36102e-81	0.190951	2.3363e-79
1	431037	431636	599	31	305	5.13913e-72	0.193391	5.35354e-70	1	516110	516709	599	118	509	5.74432e-87	0.323435	1.32273e-84
1	457822	458421	599	39	380	5.57663e-89	0.185358	1.75092e-86	1	518422	519021	599	100	456	1.22208e-81	0.312504	2.10334e-79
1	458938	459537	599	65	388	1.059e-70	0.280653	1.00421e-68	1	521506	522105	599	78	498	7.56681e-111	0.22837	4.77581e-108
1	470012	470611	599	61	416	5.01599e-82	0.246811	1.0436e-79	1	534332	534931	599	73	446	4.80381e-97	0.241746	1.79881e-94
1	471996	472595	599	133	513	1.30612e-64	0.397205	7.96354e-63	1	548916	549515	599	9	163	3.49056e-53	0.135465	1.0582e-51
1	478844	479443	599	18	244	1.38653e-64	0.159761	8.43899e-63	1	554652	555251	599	12	232	4.23626e-76	0.112869	5.27613e-74
1	490291	490890	599	62	379	3.71238e-70	0.276058	3.38339e-68	1	555283	555882	599	21	238	2.8133e-68	0.166242	2.18261e-66
1	515234	515833	599	41	314	2.80385e-66	0.236345	1.93035e-64	1	570204	570803	599	70	407	3.47969e-86	0.256456	7.69346e-84
1	517268	517867	599	16	224	5.74588e-60	0.160225	2.50631e-58	1	583711	584310	599	67	379	4.75374e-79	0.265991	7.04531e-77
1	518312	518911	599	58	387	1.75567e-75	0.254877	2.34245e-73	1	594201	594800	599	36	396	1.76889e-111	0.149536	1.13724e-108
1	521508	522107	599	52	518	9.43755e-122	0.170936	8.39317e-119	1	616844	617443	599	37	277	1.40578e-67	0.223072	1.04292e-65
1	528721	529320	599	23	291	3.83511e-75	0.160069	4.99529e-73	1	652415	653014	599	57	260	2.65295e-47	0.344204	5.59981e-46
1	534314	534913	599	65	461	1.04301e-92	0.234229	3.98725e-90	1	660133	660732	599	55	303	1.64814e-62	0.283758	8.93448e-61
1	554633	555232	599	13	249	6.92606e-72	0.123036	7.15186e-70	1	731407	732006	599	69	407	6.34159e-87	0.253239	1.45557e-84
1	555234	555833	599	6	242	9.8803e-79	0.0763733	1.65194e-76	1	775067	775666	599	25	256	6.44899e-71	0.17637	5.8828e-69
1	570204	570803	599	33	373	2.35277e-92	0.164601	8.82834e-90	1	788202	788801	599	57	350	9.54757e-77	0.25131	1.2355e-74
1	594221	594820	599	25	420	1.26904e-116	0.116127	1.05077e-113	1	795219	795818	599	96	504	1.19168e-99	0.271326	4.99429e-97
1	602898	603497	599	87	481	7.92135e-83	0.289749	1.73668e-80	1	799826	800425	599	258	736	3.62563e-80	0.45363	5.73672e-78
1	633172	633771	599	16	248	4.29782e-68	0.14375	3.37881e-66	1	806799	807398	599	9	220	2.6335e-75	0.0981632	3.12523e-73
1	642598	643197	599	84	485	4.98358e-86	0.278421	1.32691e-83	1	826062	826661	599	75	505	1.30779e-115	0.217401	9.44334e-113
1	652601	653200	599	6	253	1.15653e-82	0.0728439	2.50758e-80	1	836085	836684	599	154	548	2.89563e-78	0.381818	4.10133e-76
1	659697	660296	599	39	369	1.98381e-85	0.191176	5.10556e-83	1	850163	850762	599	45	303	4.73597e-70	0.239049	4.094e-68
1	693348	693947	599	23	255	3.27562e-63	0.184152	1.80422e-61	1	851496	852095	599	78	302	1.18054e-47	0.386359	2.54874e-46
1	731407	732006	599	45	414	1.56408e-94	0.191068	6.54916e-92	1	868652	869251	599	111	455	1.21718e-74	0.3441	1.38927e-72
1	772364	772963	599	5	231	2.54316e-76	0.0722636	3.60597e-74	1	877500	878099	599	147	725	1.717e-136	0.273474	1.86024e-133
1	775098	775697	599	20	279	3.01662e-74	0.15015	3.6899e-72	1	909293	909892	599	114	408	4.43726e-59	0.395185	1.94005e-57
1	788197	788796	599	59	390	1.2142e-75	0.256587	1.64009e-73	1	911070	911669	599	336	867	4.81455e-81	0.490957	8.01354e-79
1	795221	795820	599	74	447	8.21557e-82	0.271061	1.68852e-79	1	916509	917108	599	62	434	1.38043e-101	0.21562	6.27028e-99
1	826004	826603	599	66	554	6.7608e-121	0.195913	5.95081e-118	1	936762	937361	599	23	366	2.73087e-114	0.113145	1.90441e-111
1	826604	827203	599	45	356	3.91811e-76	0.223926	5.47896e-74	1	956323	956922	599	67	388	4.79329e-82	0.259508	8.4522e-80
1	850169	850768	599	27	279	2.8688e-67	0.190077	2.12303e-65	1	958279	958878	599	34	278	1.61183e-70	0.207211	1.4351e-68
1	868485	869084	599	21	278	7.38161e-73	0.156508	8.17031e-71	1	959489	960088	599	32	308	3.80412e-83	0.176878	7.12595e-81
1	872904	873503	599	9	291	8.40505e-92	0.0809584	3.06531e-89	1	975589	976188	599	30	286	4.7413e-77	0.181513	6.24815e-75
1	875459	876058	599	75	369	1.23688e-58	0.335464	4.90838e-57	1	981748	982347	599	68	468	1.76632e-108	0.215976	1.03418e-105
1	877500	878099	599	80	656	2.87734e-141	0.194627	3.07596e-138	1	983301	983900	599	73	442	1.07402e-95	0.244039	3.78141e-93
1	916508	917107	599	53	354	3.12922e-69	0.259002	2.67233e-67	1	995495	996094	599	71	386	1.68363e-78	0.274532	2.41488e-76
1	924419	925018	599	38	341	2.48751e-77	0.203296	3.78392e-75	1	1000053	1000652	599	158	398	8.97806e-37	0.546319	1.0051e-35
1	932502	933101	599	21	304	1.30199e-81	0.142366	2.64153e-79	1	1039981	1040580	599	53	339	4.38574e-76	0.244119	5.45729e-74
1	936762	937361	599	21	349	6.50515e-97	0.123056	3.03644e-94	1	1057120	1057719	599	55	298	7.31216e-61	0.288799	3.5759e-59
1	947213	947812	599	31	326	7.54586e-79	0.18025	1.27288e-76	1	1072254	1072853	599	60	365	1.53494e-79	0.251365	2.34142e-77
1	956666	957265	599	63	469	9.49664e-97	0.223864	4.40471e-94	1	1080671	1081270	599	71	370	2.89933e-73	0.287032	3.05118e-71
1	958270	958869	599	25	292	1.82964e-73	0.170337	2.11332e-71	1	1084222	1084821	599	67	343	3.10079e-67	0.295469	2.25292e-65
1	959512	960111	599	26	316	2.00074e-80	0.161648	3.75298e-78	1	1125043	1125642	599	78	405	7.80546e-80	0.283576	1.2116e-77
1	975588	976187	599	21	292	1.45767e-77	0.148566	2.25135e-75	1	1129669	1130268	599	90	404	1.18916e-71	0.322862	1.13318e-69
1	980339	980938	599	189	584	7.61787e-56	0.479332	2.47758e-54	1	1141304	1141903	599	43	375	4.06994e-97	0.183708	1.5288e-94
1	981764	982363	599	45	386	1.35352e-85	0.205651	3.51606e-83	1	1142090	1142689	599	74	492	6.151e-112	0.220779	4.00887e-109
1	983290	983889	599	68	469	7.62872e-93	0.239308	2.93695e-90	1	1143206	1143805	599	28	306	2.51045e-86	0.159811	5.59186e-84
1	1009143	1009742	599	110	520	2.82164e-79	0.32963	4.8977e-77	1	1158299	1158898	599	25	250	1.01045e-68	0.180876	8.05815e-67
1	1049928	1050527	599	42	321	1.19241e-67	0.235626	9.07139e-66	1	1166936	1167535	599	51	500	7.51612e-135	0.157082	7.95076e-132
1	1072110	1072709	599	23	328	1.45253e-87	0.14104	4.22168e-85	1	1188841	1189440	599	49	340	1.32326e-79	0.227548	2.02548e-77
1	1080663	1081262	599	50	374	1.09167e-77	0.232535	1.70011e-75	1	1196291	1196890	599	147	505	1.21941e-69	0.398439	1.02932e-67
1	1084223	1084822	599	38	376	1.33584e-88	0.183415	4.11072e-86	1	1210684	1211283	599	67	586	5.65559e-151	0.168594	7.38223e-148
1	1108751	1109350	599	9	227	3.19045e-69	0.105425	2.72175e-67	1	1217245	1217844	599	64	365	1.41915e-76	0.265881	1.81535e-74
1	1125041	1125640	599	50	432	6.60486e-96	0.199864	2.95063e-93	1	1219128	1219727	599	122	506	1.18647e-83	0.335431	2.28819e-81
1	1129674	1130273	599	81	397	9.24368e-63	0.33251	4.92699e-61	1	1236140	1236739	599	41	318	1.35103e-78	0.209997	1.95153e-76
1	1134424	1135023	599	15	232	9.26733e-64	0.147156	5.3109e-62	1	1245757	1246356	599	62	461	5.36556e-111	0.202411	3.40155e-108
1	1141313	1141912	599	44	353	5.10297e-76	0.221677	7.0768e-74	1	1258218	1258817	599	166	577	2.61903e-80	0.387699	4.17546e-78
1	1142091	1142690	599	80	474	1.43033e-85	0.2731	3.71102e-83	1	1264808	1265407	599	97	414	1.88131e-70	0.336489	1.66905e-68
1	1143166	1143765	599	31	321	3.23564e-77	0.183217	4.88743e-75	1	1287870	1288469	599	71	372	6.46878e-74	0.285409	7.0794e-72
1	1157073	1157672	599	30	324	3.82027e-79	0.176651	6.57363e-77	1	1293024	1293623	599	64	361	3.02733e-75	0.268984	3.58331e-73
1	1158305	1158904	599	16	260	3.509e-72	0.136704	3.70177e-70	1	1320884	1321483	599	66	378	1.9169e-79	0.263247	2.90511e-77
1	1166944	1167543	599	50	474	2.38138e-109	0.181358	1.68348e-106	1	1324494	1325093	599	106	456	6.31474e-78	0.329324	8.76447e-76
1	1188257	1188856	599	25	273	3.35202e-67	0.182931	2.4689e-65	1	1331191	1331790	599	225	599	2.2235e-59	0.494362	9.91032e-58
1	1207766	1208365	599	15	276	8.03749e-79	0.122336	1.35266e-76	1	1333498	1334097	599	71	385	3.58993e-78	0.275282	5.04956e-76
1	1210738	1211337	599	51	539	1.58339e-129	0.161286	1.53535e-126	1	1410282	1410881	599	181	575	2.47751e-72	0.421455	2.4643e-70
1	1215521	1216120	599	97	517	1.38339e-86	0.29614	3.80099e-84	1	1413353	1413952	599	84	590	1.06204e-137	0.204353	1.17354e-134
1	1217456	1218055	599	29	305	7.09745e-74	0.183201	8.456e-72	1	1416048	1416647	599	52	397	5.24171e-97	0.203378	1.96007e-94
1	1236140	1236739	599	36	290	7.24134e-63	0.230666	3.8906e-61	1	1423252	1423851	599	49	332	7.67828e-77	0.233336	9.98943e-75
1	1242256	1242855	599	27	288	3.2898e-70	0.183786	3.01113e-68	1	1428542	1429141	599	35	342	1.18095e-92	0.170466	3.60571e-90
1	1245757	1246356	599	49	404	6.82077e-88	0.210753	2.01883e-85	1	1430526	1431125	599	51	338	2.60086e-77	0.236934	3.48044e-75
1	1258218	1258817	599	96	541	3.48293e-94	0.279832	1.43357e-91	1	1442650	1443249	599	31	339	1.74959e-95	0.155751	6.10035e-93
1	1261652	1262251	599	32	244	9.46261e-52	0.251501	2.31334e-50	1	1443283	1443882	599	25	425	1.77019e-134	0.10328	1.86237e-131
1	1264797	1265396	599	88	432	3.16425e-68	0.327567	2.51267e-66	1	1456680	1457279	599	102	438	8.26366e-75	0.331823	9.52933e-73
1	1301188	1301787	599	20	266	7.07448e-70	0.157949	6.32309e-68	1	1460431	1461030	599	57	374	6.46591e-85	0.234358	1.33528e-82
1	1311298	1311897	599	21	234	3.10634e-58	0.187979	1.19564e-56	1	1470518	1471117	599	58	456	1.17992e-112	0.193223	7.8538e-110
1	1320884	1321483	599	52	379	1.19869e-77	0.237141	1.86252e-75	1	1476887	1477486	599	33	283	3.39625e-73	0.198403	3.55559e-71
1	1324466	1325065	599	105	530	3.78699e-85	0.309864	9.57979e-83	1	1524738	1525337	599	53	440	2.29671e-111	0.185586	1.47176e-108
1	1331136	1331735	599	153	608	1.20399e-78	0.378249	2.0018e-76	1	1559887	1560486	599	27	369	6.83569e-111	0.127391	4.31992e-108
1	1404575	1405174	599	88	460	3.89948e-76	0.306711	5.45591e-74	1	1585116	1585715	599	55	387	5.26466e-91	0.219224	1.48237e-88
1	1413349	1413948	599	74	516	1.34632e-102	0.233276	7.82485e-100	1	1595699	1596298	599	41	369	8.58181e-97	0.179513	3.17706e-94
1	1416046	1416645	599	29	386	1.01478e-100	0.142913	5.51941e-98	1	1599539	1600138	599	21	397	1.37396e-128	0.0967599	1.31956e-125
1	1423224	1423823	599	41	435	5.18396e-105	0.167712	3.24995e-102	1	1606092	1606691	599	16	201	1.05868e-59	0.16201	4.81402e-58
1	1428542	1429141	599	36	414	6.08814e-103	0.158489	3.57974e-100	1	1613350	1613949	599	38	292	5.29975e-72	0.215678	5.16402e-70
1	1429825	1430424	599	27	313	1.95683e-78	0.168288	3.20431e-76	1	1614398	1614997	599	46	336	1.10724e-80	0.218346	1.80399e-78
1	1442660	1443259	599	35	318	1.31023e-72	0.204416	1.42497e-70	1	1615611	1616210	599	22	293	9.25009e-88	0.138207	2.21665e-85
1	1443278	1443877	599	11	343	2.09952e-107	0.07793	1.40978e-104	1	1629527	1630126	599	96	543	1.74642e-112	0.251018	1.1563e-109
1	1456752	1457351	599	77	419	1.43443e-71	0.300433	1.44845e-69	1	1662162	1662761	599	90	496	3.04144e-101	0.260427	1.36215e-98
1	1460434	1461033	599	52	403	4.27399e-85	0.222323	1.07847e-82	1	1707116	1707715	599	52	329	1.87473e-73	0.247869	1.99448e-71
1	1470520	1471119	599	34	453	5.88196e-118	0.137567	4.97734e-115	1	1716970	1717569	599	105	448	4.52604e-76	0.332632	5.62632e-74
1	1476906	1477505	599	28	274	1.01578e-64	0.199502	6.2431e-63	1	1719316	1719915	599	60	361	3.42124e-78	0.254298	4.81838e-76
1	1479944	1480543	599	31	294	1.84265e-68	0.201057	1.48705e-66	1	1723413	1724012	599	103	476	5.08095e-86	0.306822	1.11362e-83
1	1490798	1491397	599	80	475	7.25328e-86	0.272498	1.9146e-83	1	1771082	1771681	599	54	427	7.18931e-106	0.194616	3.84964e-103
1	1524730	1525329	599	55	410	7.45909e-85	0.229126	1.85419e-82	1	1771914	1772513	599	204	660	1.50617e-84	0.407969	3.04876e-82
1	1560053	1560652	599	31	352	2.19492e-87	0.166236	6.31393e-85	1	1798479	1799078	599	90	467	9.6117e-92	0.277362	2.80704e-89
1	1580135	1580734	599	127	498	7.23831e-64	0.392839	4.17969e-62	1	1800827	1801426	599	260	722	9.33399e-76	0.466117	1.13927e-73
1	1595699	1596298	599	32	338	7.96299e-82	0.178059	1.63811e-79	1	1819381	1819980	599	26	308	4.09976e-89	0.149562	1.05083e-86
1	1599440	1600039	599	16	379	2.36286e-113	0.0917866	1.82864e-110	1	1823736	1824335	599	28	230	9.85534e-59	0.216425	4.21702e-57
1	1604893	1605492	599	23	299	8.13404e-78	0.155538	1.27862e-75	1	1830193	1830792	599	39	359	4.85679e-95	0.177203	1.65788e-92
1	1606080	1606679	599	8	243	3.31757e-76	0.0908058	4.66272e-74	1	1834569	1835168	599	47	338	1.50362e-80	0.220983	2.43412e-78
1	1613785	1614384	599	3	209	1.21019e-71	0.0619894	1.22807e-69	1	1852820	1853419	599	224	608	5.20798e-62	0.484731	2.73662e-60
1	1614389	1614988	599	36	342	1.97982e-79	0.193767	3.47088e-77	1	1858747	1859346	599	71	418	3.98437e-89	0.252504	1.02278e-86
1	1615490	1616089	599	26	279	3.26181e-68	0.184427	2.58744e-66	1	1859901	1860500	599	163	547	2.2409e-73	0.403058	2.37427e-71
1	1616624	1617223	599	12	169	1.12883e-45	0.176058	1.82658e-44	1	1866858	1867457	599	108	544	2.02234e-104	0.278525	1.02754e-101
1	1629526	1630125	599	71	475	2.1476e-92	0.245263	8.08311e-90	1	1868689	1869288	599	110	456	1.56256e-75	0.340515	1.88077e-73
1	1661418	1662017	599	25	323	8.87941e-84	0.153097	2.06451e-81	1	1888668	1889267	599	55	275	2.24419e-53	0.314458	6.8888e-52
1	1662165	1662764	599	59	420	8.7014e-85	0.237379	2.15668e-82	1	1890859	1891458	599	17	319	1.81425e-103	0.103704	8.88754e-101
1	1702750	1703349	599	9	250	2.61506e-77	0.0951213	3.97094e-75	1	1904479	1905078	599	68	363	4.63112e-73	0.281976	4.81526e-71
1	1707142	1707741	599	52	357	6.7165e-71	0.252546	6.46232e-69	1	1912958	1913557	599	107	538	3.68443e-103	0.279412	1.78242e-100
1	1721139	1721738	599	98	470	1.09595e-72	0.330184	1.19786e-70	1	1914721	1915320	599	115	464	4.95514e-75	0.348084	5.78695e-73
1	1723417	1724016	599	83	484	1.99774e-86	0.27607	5.43867e-84	1	1919607	1920206	599	24	277	1.1541e-79	0.157047	1.77306e-77
1	1726227	1726826	599	44	360	3.20859e-78	0.217139	5.18308e-76	1	1932979	1933578	599	35	315	7.20612e-83	0.185927	1.32952e-80
1	1730516	1731115	599	54	349	5.61031e-67	0.267173	4.06409e-65	1	1933863	1934462	599	32	318	8.65113e-87	0.171004	1.97415e-84
1	1771068	1771667	599	42	391	8.08875e-90	0.19141	2.65906e-87	1	1945703	1946302	599	69	422	5.68933e-92	0.243802	1.68094e-89
1	1774216	1774815	599	29	290	5.46068e-69	0.193246	4.58327e-67	1	1947079	1947678	599	42	347	5.28391e-88	0.195438	1.2817e-85
1	1779752	1780351	599	100	476	3.87996e-73	0.331794	4.38075e-71	1	1950658	1951257	599	77	368	1.33669e-68	0.310066	1.05881e-66
1	1798336	1798935	599	63	409	2.08096e-78	0.258398	3.40245e-76	1	1951574	1952173	599	85	473	3.18779e-97	0.260093	1.20313e-94
1	1800827	1801426	599	177	640	1.293e-74	0.410109	1.6247e-72	1	1997212	1997811	599	25	239	1.02902e-64	0.189754	6.39996e-63
1	1819444	1820043	599	25	258	2.71172e-62	0.194247	1.39737e-60	1	2002389	2002988	599	100	538	5.59469e-108	0.262906	3.22186e-105
1	1830207	1830806	599	36	398	1.13929e-97	0.165185	5.49642e-95	1	2013783	2014382	599	132	538	1.74063e-87	0.338014	4.11465e-85
1	1831674	1832273	599	41	338	8.39713e-74	0.218661	9.94445e-72	1	2016002	2016601	599	115	584	1.33578e-112	0.273778	8.87342e-110
1	1858836	1859435	599	67	429	1.75702e-81	0.259344	3.53519e-79	1	2060123	2060722	599	23	314	1.43093e-94	0.132993	4.78332e-92
1	1860094	1860693	599	20	276	3.08848e-73	0.151881	3.51365e-71	1	2077730	2078329	599	67	446	1.06102e-101	0.224216	4.84391e-99
1	1888684	1889283	599	32	281	2.0686e-63	0.216465	1.15526e-61	1	2082472	2083071	599	28	312	1.52637e-88	0.156563	3.80754e-86
1	1890860	1891459	599	20	297	2.50028e-80	0.140525	4.65827e-78	1	2096455	2097054	599	86	426	3.33681e-81	0.293261	5.60392e-79
1	1891499	1892098	599	17	242	5.68768e-65	0.154375	3.56172e-63	1	2097349	2097948	599	78	519	4.95379e-118	0.218727	3.80889e-115
1	1899523	1900122	599	26	319	2.01258e-81	0.160042	4.02855e-79	1	2133641	2134240	599	169	556	6.54062e-73	0.40968	6.73481e-71
1	1904490	1905089	599	50	356	3.91998e-72	0.244928	4.11502e-70	1	2152428	2153027	599	78	414	9.06846e-83	0.277109	1.66445e-80
1	1912958	1913557	599	100	498	2.82527e-79	0.316486	4.90367e-77	1	2167226	2167825	599	87	425	3.22182e-80	0.297026	5.11466e-78
1	1914823	1915422	599	61	426	4.45194e-85	0.240737	1.1214e-82	1	2168692	2169291	599	207	631	2.73559e-75	0.433316	3.24483e-73
1	1919602	1920201	599	24	318	3.84572e-83	0.150692	8.60015e-81	1	2194052	2194651	599	38	415	1.7916e-116	0.148896	1.32421e-113
1	1932979	1933578	599	24	339	3.33463e-90	0.140855	1.11781e-87	1	2201044	2201643	599	33	374	2.15642e-106	0.147804	1.17717e-103
1	1933870	1934469	599	30	324	3.82027e-79	0.176651	6.57363e-77	1	2203718	2204317	599	57	379	1.24598e-86	0.231107	2.81863e-84
1	1936611	1937210	599	81	472	2.7513e-84	0.277347	6.60088e-82	1	2206663	2207262	599	21	252	1.77126e-73	0.156427	1.88632e-71
1	1945701	1946300	599	57	421	1.14645e-86	0.229824	3.16588e-84	1	2213578	2214177	599	71	464	1.03935e-104	0.226337	5.33464e-102
1	1997191	1997790	599	25	231	1.48878e-53	0.218512	4.11947e-52	1	2216633	2217232	599	42	371	1.35958e-96	0.182146	4.98452e-94
1	2002389	2002988	599	89	485	1.1894e-82	0.29313	2.57565e-80	1	2221323	2221922	599	152	696	4.85343e-124	0.294193	4.27919e-121
1	2003260	2003859	599	88	396	2.70262e-58	0.358887	1.04622e-56	1	2247119	2247718	599	199	670	8.81924e-90	0.392494	2.33802e-87
1	2013785	2014384	599	90	517	2.84001e-91	0.276947	1.0069e-88	1	2250186	2250785	599	46	390	8.90419e-100	0.186635	3.75184e-97
1	2016006	2016605	599	98	556	3.3961e-97	0.277039	1.60622e-94	1	2259476	2260075	599	37	368	3.28681e-100	0.165236	1.4098e-97
1	2060126	2060725	599	20	299	5.25096e-81	0.139531	1.02379e-78	1	2260076	2260675	599	45	398	1.49161e-103	0.179323	7.33191e-101
1	2077799	2078398	599	37	328	4.71786e-74	0.207159	5.68862e-72	1	2303467	2304066	599	51	266	3.53252e-53	0.305304	1.07051e-51
1	2082465	2083064	599	20	318	1.83267e-87	0.13073	5.29673e-85	1	2312060	2312659	599	44	317	1.02761e-75	0.223609	1.25e-73
1	2091259	2091858	599	42	381	1.30599e-86	0.196694	3.59418e-84	1	2317792	2318391	599	66	315	6.5412e-59	0.319037	2.8324e-57
1	2097351	2097950	599	58	570	4.40189e-133	0.169967	4.40372e-130	1	2321088	2321687	599	11	180	2.53639e-57	0.139406	9.94052e-56
1	2107223	2107822	599	37	332	2.48962e-75	0.204526	3.2886e-73	1	2330885	2331484	599	292	792	4.07562e-80	0.472283	6.42718e-78
1	2108233	2108832	599	32	308	4.48361e-72	0.196425	4.68965e-70	1	2341850	2342449	599	57	364	1.68877e-81	0.241139	2.8854e-79
1	2152428	2153027	599	57	429	3.80736e-89	0.225332	1.20716e-86	1	2392231	2392830	599	86	512	1.72274e-109	0.241927	1.04211e-106
1	2167223	2167822	599	72	396	2.99108e-68	0.300457	2.38027e-66	1	2393974	2394573	599	60	334	3.52413e-69	0.276013	2.89149e-67
1	2168712	2169311	599	186	612	1.22214e-63	0.44981	6.94682e-62	1	2405824	2406423	599	15	268	2.76377e-86	0.113655	6.1393e-84
1	2194089	2194688	599	33	426	5.90002e-110	0.143161	4.23394e-107	1	2406666	2407265	599	74	313	2.7212e-53	0.35512	8.31232e-52
1	2201054	2201653	599	30	370	2.40955e-94	0.153581	9.99411e-92	1	2414499	2415098	599	123	554	7.60142e-98	0.307433	2.94973e-95
1	2203735	2204334	599	45	350	2.94833e-74	0.227973	3.60995e-72	1	2420918	2421517	599	54	492	4.11937e-129	0.167786	3.99177e-126
1	2213664	2214263	599	71	494	3.52938e-98	0.235408	1.73796e-95	1	2426306	2426905	599	76	367	6.17559e-69	0.307385	4.99341e-67
1	2216633	2217232	599	45	366	2.84074e-79	0.217488	4.92885e-77	1	2435855	2436454	599	70	314	4.78744e-56	0.337042	1.73153e-54
1	2221323	2221922	599	130	636	2.55633e-99	0.310979	1.31749e-96	1	2440938	2441537	599	44	292	4.59575e-67	0.243911	3.30804e-65
1	2227231	2227830	599	95	464	7.49359e-73	0.325456	8.28683e-71	1	2445425	2446024	599	83	392	2.51934e-72	0.310074	2.50452e-70
1	2247193	2247792	599	150	614	8.2722e-82	0.367661	1.6999e-79	1	2454666	2455265	599	82	573	1.9298e-133	0.206211	1.99914e-130
1	2259470	2260069	599	46	384	4.14152e-84	0.210666	9.82934e-82	1	2458431	2459030	599	52	329	1.87473e-73	0.247869	1.99448e-71
1	2260074	2260673	599	38	423	5.91376e-104	0.162072	3.59055e-101	1	2460449	2461048	599	52	423	3.35246e-106	0.190276	1.81657e-103
1	2280082	2280681	599	44	339	1.22512e-71	0.231339	1.24246e-69	1	2462778	2463377	599	89	416	4.71058e-76	0.309988	5.84633e-74
1	2289499	2290098	599	24	288	3.922e-73	0.167349	4.42413e-71	1	2464661	2465260	599	144	588	1.33531e-95	0.333607	4.68031e-93
1	2312044	2312643	599	26	319	2.01258e-81	0.160042	4.02855e-79	1	2465454	2466053	599	68	386	1.19365e-80	0.264328	1.94197e-78
1	2317818	2318417	599	48	332	2.5163e-66	0.254607	1.73726e-64	1	2467237	2467836	599	66	333	1.11658e-64	0.300853	6.93103e-63
1	2322273	2322872	599	50	353	3.26545e-71	0.247121	3.21301e-69	1	2468959	2469558	599	70	546	4.57423e-134	0.188587	4.78405e-131
1	2330887	2331486	599	232	758	1.18692e-77	0.442389	1.84565e-75	1	2495014	2495613	599	92	515	4.3247e-106	0.255363	2.33531e-103
1	2341837	2342436	599	35	359	7.40596e-86	0.17987	1.95339e-83	1	2507603	2508202	599	87	418	5.5271e-78	0.302246	7.69568e-76
1	2344114	2344713	599	64	394	3.44314e-73	0.272453	3.9027e-71	1	2534068	2534667	599	73	374	3.4164e-73	0.290823	3.57448e-71
1	2392284	2392883	599	27	365	9.03927e-96	0.143102	4.01505e-93	1	2537628	2538227	599	282	694	2.31765e-60	0.524128	1.09721e-58
1	2393961	2394560	599	28	330	4.52861e-83	0.163862	1.00647e-80	1	2542137	2542736	599	91	424	2.68956e-77	0.309942	3.59341e-75
1	2403736	2404335	599	11	282	6.79395e-86	0.0958559	1.7957e-83	1	2562473	2563072	599	71	424	3.86497e-91	0.248757	1.09616e-88
1	2405843	2406442	599	17	285	1.37083e-79	0.129751	2.43062e-77	1	2565661	2566260	599	41	348	2.9744e-89	0.19094	7.6822e-87
1	2406642	2407241	599	46	326	4.97565e-66	0.250332	3.36517e-64	1	2579006	2579605	599	125	500	4.32674e-80	0.347218	6.81209e-78
1	2409684	2410283	599	80	340	9.00056e-48	0.387144	1.67345e-46	1	2580660	2581259	599	66	476	6.79239e-113	0.206709	4.55211e-110
1	2414512	2415111	599	84	522	5.7479e-97	0.257838	2.68907e-94	1	2629976	2630575	599	47	276	2.44492e-59	0.273812	1.0869e-57
1	2420879	2421478	599	62	430	1.56379e-85	0.241784	4.04821e-83	1	2632516	2633115	599	76	442	1.84659e-93	0.252859	5.85798e-91
1	2423571	2424170	599	17	324	5.39429e-93	0.113288	2.08952e-90	1	2667534	2668133	599	28	268	2.08465e-72	0.183921	2.0829e-70
1	2435864	2436463	599	54	306	3.15289e-54	0.30696	9.1461e-53	1	2685505	2686104	599	172	636	4.05033e-94	0.362005	1.32586e-91
1	2439366	2439965	599	86	475	9.26634e-82	0.290572	1.89747e-79	1	2690680	2691279	599	35	249	1.83637e-59	0.238575	8.21723e-58
1	2441007	2441606	599	18	273	2.22052e-74	0.141783	2.7424e-72	1	2703517	2704116	599	104	436	5.38323e-73	0.339295	5.574e-71
1	2443455	2444054	599	15	285	6.34075e-82	0.118243	1.31267e-79	1	2809475	2810074	599	42	366	8.50134e-95	0.184766	2.87118e-92
1	2445550	2446149	599	59	399	2.26823e-78	0.25051	3.69877e-76	1	2811147	2811746	599	35	302	3.39451e-78	0.194401	4.78161e-76
1	2454820	2455419	599	94	538	1.13393e-94	0.276204	4.77925e-92	1	2817110	2817709	599	41	293	7.80666e-70	0.228996	6.66753e-68
1	2458409	2459008	599	43	338	3.843e-72	0.2276	4.04168e-70	1	2821066	2821665	599	34	410	9.88437e-119	0.137531	7.73415e-116
1	2460449	2461048	599	31	432	4.54485e-114	0.134045	3.56498e-111	1	2825982	2826581	599	33	251	7.81361e-62	0.225367	4.05992e-60
1	2462701	2463300	599	48	325	3.4177e-64	0.260399	2.01985e-62	1	2829103	2829702	599	54	363	1.61449e-83	0.230822	3.08814e-81
1	2465462	2466061	599	39	332	1.33968e-73	0.213694	1.56526e-71	1	2835050	2835649	599	109	436	4.53095e-70	0.353965	3.92261e-68
1	2467153	2467752	599	47	311	1.06918e-60	0.267956	4.91456e-59	1	2846572	2847171	599	64	437	5.29865e-101	0.220071	2.34996e-98
1	2468962	2469561	599	62	494	2.36244e-105	0.209098	1.49541e-102	1	2855634	2856233	599	33	220	4.7719e-51	0.259375	1.26714e-49
1	2495011	2495610	599	86	452	3.80923e-75	0.306065	4.96407e-73	1	2882643	2883242	599	56	329	1.98211e-70	0.264188	1.75486e-68
1	2507606	2508205	599	71	430	6.7327e-79	0.272207	1.13951e-76	1	2888282	2888881	599	89	397	4.31296e-70	0.325582	3.73794e-68
1	2534068	2534667	599	54	394	1.06396e-80	0.235162	2.03316e-78	1	2894877	2895476	599	110	455	3.14659e-75	0.341299	3.72021e-73
1	2537628	2538227	599	190	689	1.87752e-80	0.405603	3.52925e-78	1	2915467	2916066	599	51	366	5.39653e-87	0.217874	1.24491e-84
1	2541218	2541817	599	36	342	1.97982e-79	0.193767	3.47088e-77	1	2917573	2918172	599	120	490	5.66047e-80	0.341719	8.85237e-78
1	2542063	2542662	599	75	450	5.40403e-82	0.272373	1.12256e-79	1	2928633	2929232	599	70	458	1.92128e-103	0.226602	9.39779e-101
1	2551722	2552321	599	33	348	3.78787e-84	0.177076	9.0135e-82	1	2951295	2951894	599	40	305	7.15892e-75	0.214975	8.28699e-73
1	2562469	2563068	599	56	385	2.18519e-76	0.248614	3.11007e-74	1	2952248	2952847	599	44	397	4.10047e-104	0.176412	2.05897e-101
1	2565157	2565756	599	30	365	1.10864e-92	0.155796	4.22932e-90	1	2964450	2965049	599	51	394	8.31864e-97	0.201621	3.08195e-94
1	2576554	2577153	599	99	485	2.97519e-76	0.322435	4.20101e-74	1	2971310	2971909	599	106	494	8.89807e-90	0.302873	2.35863e-87
1	2578960	2579559	599	73	514	9.32415e-103	0.231434	5.45238e-100	1	2973983	2974582	599	60	372	6.59932e-82	0.246389	1.1527e-79
1	2580665	2581264	599	37	393	4.51563e-95	0.171242	1.94152e-92	1	2991485	2992084	599	171	518	1.18855e-61	0.445895	6.10107e-60
1	2588614	2589213	599	64	423	6.83863e-82	0.252878	1.41252e-79	1	2997767	2998366	599	74	374	1.63015e-72	0.294329	1.63873e-70
1	2629992	2630591	599	43	339	1.86946e-72	0.226892	2.00867e-70	1	3001192	3001791	599	259	715	2.08274e-74	0.469153	2.34375e-72
1	2632516	2633115	599	38	423	5.91376e-104	0.162072	3.59055e-101	1	3004965	3005564	599	135	443	2.70547e-58	0.422717	1.12667e-56
1	2657757	2658356	599	36	326	2.73467e-74	0.203816	3.35789e-72	1	3008568	3009167	599	141	541	2.97582e-83	0.356923	5.61277e-81
1	2685505	2686104	599	108	583	2.57123e-98	0.287771	1.2728e-95	1	3009579	3010178	599	111	530	6.00101e-98	0.293373	2.33972e-95
1	2695463	2696062	599	20	270	3.21458e-71	0.155465	3.16477e-69	1	3023136	3023735	599	40	292	2.58519e-70	0.225118	2.27199e-68
1	2733326	2733925	599	84	411	7.99574e-65	0.331147	4.94677e-63	1	3030785	3031384	599	187	812	2.20651e-138	0.303552	2.46232e-135
1	2809439	2810038	599	24	334	1.61529e-88	0.143081	4.95065e-86	1	3034828	3035427	599	24	264	7.49182e-75	0.165269	8.66329e-73
1	2811143	2811742	599	18	296	3.26815e-82	0.130133	6.88561e-80	1	3070608	3071207	599	16	296	7.74522e-96	0.107281	2.74546e-93
1	2820359	2820958	599	38	297	2.05654e-63	0.235245	1.14895e-61	1	3072211	3072810	599	72	376	1.5779e-74	0.285707	1.79028e-72
1	2821050	2821649	599	22	376	5.24091e-105	0.11796	3.28532e-102	1	3076673	3077272	599	47	353	8.55022e-86	0.211095	1.85094e-83
1	2825982	2826581	599	26	281	7.21006e-69	0.183035	5.99576e-67	1	3084331	3084930	599	26	238	2.05553e-63	0.196645	1.17948e-61
1	2829019	2829618	599	58	388	8.73593e-76	0.254186	1.19025e-73	1	3099274	3099873	599	123	470	2.75647e-72	0.365034	2.73228e-70
1	2846553	2847152	599	54	423	1.04179e-89	0.218267	3.40219e-87	1	3104863	3105462	599	53	432	1.61574e-108	0.18919	9.47388e-106
1	2855661	2856260	599	15	289	2.63601e-83	0.11651	5.95137e-81	1	3111196	3111795	599	110	468	3.37517e-79	0.331382	5.04767e-77
1	2882627	2883226	599	41	337	1.73574e-73	0.219345	2.00769e-71	1	3122057	3122656	599	142	620	1.37442e-106	0.311691	7.55049e-104
1	2888309	2888908	599	72	404	1.43127e-70	0.294211	1.3444e-68	1	3127474	3128073	599	25	316	3.74129e-93	0.14109	1.16915e-90
1	2894876	2895475	599	84	400	9.20123e-62	0.340715	4.56304e-60	1	3135984	3136583	599	62	400	6.932e-90	0.234889	1.84821e-87
1	2911311	2911910	599	83	435	3.10829e-72	0.308708	3.29129e-70	1	3136592	3137191	599	119	504	7.9266e-85	0.329297	1.62995e-82
1	2915381	2915980	599	51	401	2.74206e-85	0.219799	6.99542e-83	1	3144030	3144629	599	119	467	1.22095e-73	0.356624	1.31438e-71
1	2917550	2918149	599	81	439	1.09353e-74	0.299214	1.37959e-72	1	3156057	3156656	599	53	420	2.9138e-104	0.194863	1.47109e-101
1	2920790	2921389	599	60	394	4.16944e-76	0.257578	5.81309e-74	1	3172380	3172979	599	155	502	7.83051e-65	0.420903	4.90875e-63
1	2928632	2929231	599	69	481	9.63998e-96	0.236068	4.27613e-93	1	3180669	3181268	599	50	332	4.8144e-76	0.237397	5.97089e-74
1	2945822	2946421	599	48	340	8.95069e-69	0.248291	7.38756e-67	1	3188954	3189553	599	41	316	6.85278e-78	0.211402	9.4802e-76
1	2952250	2952849	599	45	390	7.25511e-87	0.203434	2.02763e-84	1	3192379	3192978	599	87	505	2.09702e-106	0.24797	1.14509e-103
1	2964480	2965079	599	41	388	9.47411e-90	0.189097	3.10202e-87	1	3201128	3201727	599	42	370	3.11091e-96	0.182664	1.12321e-93
1	3002275	3002874	599	86	428	2.39726e-68	0.324074	1.9206e-66	1	3225601	3226200	599	118	426	3.76094e-62	0.389666	1.9935e-60
1	3008578	3009177	599	127	560	3.17394e-80	0.347562	5.87957e-78	1	3244565	3245164	599	160	588	1.2566e-86	0.367479	2.84215e-84
1	3009576	3010175	599	95	471	8.22511e-75	0.320396	1.04761e-72	1	3262917	3263516	599	151	574	1.92692e-87	0.357298	4.54601e-85
1	3023137	3023736	599	21	317	5.1554e-86	0.136201	1.37142e-83	1	3268922	3269521	599	119	455	4.44881e-70	0.366475	3.85198e-68
1	3027887	3028486	599	56	374	4.83077e-73	0.256309	5.41706e-71	1	3275573	3276172	599	77	398	3.02633e-78	0.28554	4.28349e-76
1	3030788	3031387	599	160	708	2.91844e-101	0.336451	1.61787e-98	1	3293207	3293806	599	74	461	2.33437e-101	0.236331	1.05071e-98
1	3053221	3053820	599	10	226	1.37725e-67	0.113653	1.04352e-65	1	3295377	3295976	599	68	363	4.63112e-73	0.281976	4.81526e-71
1	3070606	3071205	599	13	290	4.10448e-86	0.104652	1.09844e-83	1	3296198	3296797	599	52	379	1.06886e-90	0.213542	2.96445e-88
1	3072230	3072829	599	50	361	1.13624e-73	0.241357	1.33378e-71	1	3356080	3356679	599	72	467	5.96906e-105	0.227597	3.09239e-102
1	3087837	3088436	599	14	230	3.39379e-64	0.141231	2.00673e-62	1	3359356	3359955	599	30	307	1.0369e-84	0.168395	2.11594e-82
1	3099272	3099871	599	105	466	1.87856e-67	0.354467	1.40867e-65	1	3421502	3422101	599	65	287	9.66393e-51	0.347402	2.51942e-49
1	3104866	3105465	599	52	416	3.65365e-89	0.215035	1.15941e-86	1	3422292	3422891	599	25	229	4.32773e-61	0.198602	2.14609e-59
1	3122117	3122716	599	84	525	7.31634e-98	0.2563	3.55661e-95	1	3445937	3446536	599	29	216	6.33725e-53	0.238085	1.89085e-51
1	3127474	3128073	599	23	307	1.69725e-80	0.151253	3.20101e-78	1	3473132	3473731	599	19	238	2.33423e-70	0.153926	2.05651e-68
1	3135988	3136587	599	39	371	4.49703e-86	0.190091	1.20066e-83	1	3482386	3482985	599	150	496	1.28828e-65	0.413586	8.47505e-64
1	3142341	3142940	599	76	415	4.44197e-71	0.299989	4.32784e-69	1	3483924	3484523	599	78	464	2.40254e-99	0.245899	9.94404e-97
1	3151501	3152100	599	46	315	1.15085e-62	0.259576	6.09384e-61	1	3490970	3491569	599	84	405	8.32137e-76	0.302833	1.01807e-73
1	3156176	3156775	599	31	345	4.43909e-85	0.169793	1.11837e-82	1	3493504	3494103	599	55	393	4.3287e-93	0.215708	1.34993e-90
1	3173187	3173786	599	46	373	1.21762e-80	0.217205	2.31737e-78	1	3515064	3515663	599	90	494	1.38894e-100	0.261529	6.05052e-98
1	3180668	3181267	599	34	384	5.27318e-95	0.163611	2.25886e-92	1	3516924	3517523	599	54	376	5.23862e-88	0.222431	1.27141e-85
1	3182994	3183593	599	77	372	3.05183e-58	0.340436	1.17516e-56	1	3525174	3525773	599	95	386	4.1698e-63	0.355473	2.34554e-61
1	3186487	3187086	599	18	265	1.1435e-71	0.146331	1.16268e-69	1	3564367	3564966	599	101	438	2.03911e-75	0.328897	2.43755e-73
1	3192382	3192981	599	69	433	3.18223e-81	0.263536	6.29492e-79	1	3580111	3580710	599	36	294	1.90581e-74	0.20472	2.14865e-72
1	3201128	3201727	599	29	372	4.93457e-96	0.148575	2.21782e-93	1	3592406	3593005	599	18	257	1.34851e-78	0.136132	1.94834e-76
1	3223693	3224292	599	107	518	1.52846e-80	0.322803	2.89208e-78	1	3594244	3594843	599	103	417	8.12443e-68	0.352446	6.12113e-66
1	3262658	3263257	599	202	621	7.7346e-59	0.478269	3.10922e-57	1	3598699	3599298	599	60	390	4.92849e-88	0.234446	1.19787e-85
1	3268902	3269501	599	61	405	1.09588e-78	0.253852	1.82724e-76	1	3600607	3601206	599	59	364	5.82727e-80	0.248445	9.10705e-78
1	3270743	3271342	599	25	339	3.845e-89	0.14548	1.21876e-86	1	3603104	3603703	599	24	277	1.1541e-79	0.157047	1.77306e-77
1	3274613	3275212	599	26	294	3.83355e-73	0.174471	4.33069e-71	1	3631933	3632532	599	123	477	2.33218e-74	0.359431	2.61769e-72
1	3275561	3276160	599	48	357	5.13559e-74	0.235845	6.17935e-72	1	3638141	3638740	599	22	246	3.19809e-70	0.1664	2.79603e-68
1	3295381	3295980	599	69	407	1.65527e-73	0.281225	1.92076e-71	1	3643872	3644471	599	48	318	8.02258e-73	0.239941	8.21265e-71
1	3296199	3296798	599	34	451	2.75531e-117	0.138206	2.30719e-114	1	3654823	3655422	599	32	313	5.76001e-85	0.173892	1.19227e-82
1	3309441	3310040	599	14	302	4.89829e-89	0.105748	1.54217e-86	1	3664785	3665384	599	39	393	2.10503e-107	0.161114	1.1887e-104
1	3311770	3312369	599	59	370	1.25442e-69	0.271193	1.10129e-67	1	3666967	3667566	599	34	351	6.4947e-97	0.161944	2.41619e-94
1	3356112	3356711	599	41	416	8.16548e-99	0.175754	4.12608e-96	1	3671065	3671664	599	51	313	8.58249e-69	0.25696	6.87285e-67
1	3396754	3397353	599	24	285	3.87752e-72	0.169216	4.07279e-70	1	3681239	3681838	599	54	305	6.87226e-64	0.277373	4.06088e-62
1	3421504	3422103	599	44	314	6.72975e-64	0.250828	3.89755e-62	1	3701241	3701840	599	56	272	9.50588e-52	0.323122	2.63994e-50
1	3438035	3438634	599	19	322	5.79643e-90	0.124043	1.91873e-87	1	3714136	3714735	599	32	270	1.91839e-69	0.203359	1.59756e-67
1	3450311	3450910	599	9	223	8.05999e-68	0.107445	6.20312e-66	1	3715947	3716546	599	61	292	7.49732e-55	0.322746	2.52017e-53
1	3473125	3473724	599	18	290	3.65002e-80	0.132986	6.73178e-78	1	3717751	3718350	599	74	346	1.44633e-63	0.319465	8.3781e-62
1	3483923	3484522	599	53	480	1.33406e-108	0.188153	9.2492e-106	1	3727148	3727747	599	78	385	2.25809e-73	0.299073	2.3912e-71
1	3496089	3496688	599	31	320	6.85528e-77	0.183821	1.01205e-74	1	3735690	3736289	599	121	499	4.08964e-82	0.337815	7.23505e-80
1	3501493	3502092	599	65	366	3.00121e-64	0.298425	1.78302e-62	1	3739343	3739942	599	107	423	2.55593e-67	0.359325	1.86878e-65
1	3505399	3505998	599	12	263	5.77075e-78	0.109678	9.16514e-76	1	3755320	3755919	599	57	343	2.19536e-74	0.256719	2.4683e-72
1	3515065	3515664	599	77	442	2.99143e-78	0.284064	4.84491e-76	1	3758795	3759394	599	80	395	2.9937e-75	0.297719	3.54447e-73
1	3516868	3517467	599	36	382	2.01218e-92	0.172464	7.58356e-90	1	3764982	3765581	599	20	244	1.52463e-71	0.155906	1.44392e-69
1	3525207	3525806	599	70	386	1.08208e-66	0.301096	7.68091e-65	1	3766442	3767041	599	103	486	3.52997e-89	0.300223	9.08618e-87
1	3529187	3529786	599	69	277	3.70105e-37	0.422063	3.48926e-36	1	3767437	3768036	599	86	462	6.85882e-93	0.269365	2.11801e-90
1	3598699	3599298	599	41	399	2.66532e-93	0.183623	1.04864e-90	1	3773241	3773840	599	35	279	5.3512e-70	0.211417	4.61524e-68
1	3600614	3601213	599	62	431	7.73786e-86	0.241196	2.03862e-83	1	3780091	3780690	599	25	275	6.61977e-78	0.163456	9.17436e-76
1	3603084	3603683	599	12	269	4.68656e-80	0.107082	8.56734e-78	1	3808551	3809150	599	49	459	7.4161e-122	0.166011	6.25235e-119
1	3632017	3632616	599	86	457	1.41536e-76	0.30256	2.04482e-74	1	3817097	3817696	599	58	457	5.22791e-113	0.19278	3.51466e-110
1	3638074	3638673	599	22	278	7.93844e-72	0.162271	8.16313e-70	1	3863843	3864442	599	87	411	9.25493e-76	0.30765	1.12978e-73
1	3641483	3642082	599	74	425	2.46539e-75	0.285786	3.25811e-73	1	3875144	3875743	599	123	502	7.49295e-82	0.340741	1.30654e-79
1	3643892	3644491	599	42	286	7.19023e-57	0.266238	2.51156e-55	1	3903481	3904080	599	38	306	5.94574e-77	0.205248	7.77762e-75
1	3655003	3655602	599	52	340	9.6397e-66	0.265873	6.38462e-64	1	3912554	3913153	599	82	356	1.1019e-61	0.339475	5.67025e-60
1	3658359	3658958	599	11	232	1.99143e-68	0.117963	1.60212e-66	1	3937764	3938363	599	26	302	6.96296e-87	0.152707	1.59574e-84
1	3664741	3665340	599	38	448	3.30501e-112	0.152605	2.49705e-109	1	3971838	3972437	599	110	515	7.67435e-94	0.299837	2.48042e-91
1	3671127	3671726	599	29	306	3.34389e-74	0.182567	4.07785e-72	1	3984917	3985516	599	22	256	6.2848e-74	0.159493	6.88332e-72
1	3714202	3714801	599	22	283	1.69737e-73	0.159233	1.9665e-71	1	3995562	3996161	599	43	309	9.3766e-74	0.225318	1.01572e-71
1	3735687	3736286	599	83	472	6.50336e-83	0.283415	1.43204e-80	1	3998030	3998629	599	73	323	5.49759e-57	0.339421	2.10859e-55
1	3739357	3739956	599	59	430	7.27016e-88	0.231592	2.14982e-85	1	4003405	4004004	599	132	504	2.50922e-77	0.361853	3.36071e-75
1	3755322	3755921	599	36	321	1.0858e-72	0.20717	1.18703e-70	1	4006352	4006951	599	112	518	1.65757e-93	0.302916	5.27128e-91
1	3758730	3759329	599	100	389	7.29804e-50	0.40999	1.56438e-48	1	4011486	4012085	599	118	486	6.21031e-80	0.339446	9.69268e-78
1	3764958	3765557	599	20	303	2.30986e-82	0.137582	4.91167e-80	1	4012759	4013358	599	49	325	1.96515e-74	0.238645	2.2137e-72
1	3766459	3767058	599	86	448	5.26685e-74	0.308928	6.32967e-72	1	4014287	4014886	599	102	356	1.86247e-50	0.412562	4.77342e-49
1	3767437	3768036	599	78	441	2.81861e-77	0.288005	4.27082e-75	1	4016491	4017090	599	18	291	1.60785e-91	0.119317	4.64163e-89
1	3771855	3772454	599	20	292	1.2321e-78	0.143074	2.04619e-76	1	4065123	4065722	599	92	504	1.86047e-102	0.261187	8.75867e-100
1	3780091	3780690	599	21	314	5.36519e-85	0.137576	1.34476e-82	1	4067497	4068096	599	47	274	1.14187e-58	0.275933	4.86974e-57
1	3790412	3791011	599	52	349	1.82204e-68	0.258649	1.47142e-66	1	4069034	4069633	599	88	394	8.85467e-70	0.324897	7.52657e-68
1	3808556	3809155	599	43	431	7.81756e-102	0.176267	4.42638e-99	1	4076803	4077402	599	68	437	7.83303e-98	0.232047	3.03786e-95
1	3817091	3817690	599	51	465	1.45187e-105	0.188194	9.24109e-103	1	4086132	4086731	599	56	315	9.19514e-66	0.276605	6.10709e-64
1	3863860	3864459	599	76	425	5.64557e-74	0.292588	6.77515e-72	1	4095720	4096319	599	23	259	5.13373e-74	0.163105	5.65028e-72
1	3875143	3875742	599	104	480	7.57006e-72	0.34071	7.7955e-70	1	4114480	4115079	599	42	339	3.69358e-85	0.200304	7.73111e-83
1	3879088	3879687	599	143	554	5.93614e-70	0.391687	5.33417e-68	1	4125634	4126233	599	85	400	1.44178e-73	0.310054	1.5452e-71
1	3903481	3904080	599	30	317	7.48133e-77	0.180774	1.10067e-74	1	4140411	4141010	599	39	310	1.69412e-77	0.206882	2.28975e-75
1	3916028	3916627	599	38	380	6.7326e-90	0.181385	2.22177e-87	1	4186353	4186952	599	41	381	3.97142e-101	0.17357	1.77016e-98
1	3929754	3930353	599	36	282	2.33208e-60	0.237606	1.0462e-58	1	4190044	4190643	599	139	574	2.72943e-94	0.331204	9.01042e-92
1	3937534	3938133	599	40	305	2.76627e-64	0.238731	1.64768e-62	1	4191048	4191647	599	49	344	5.43773e-81	0.224758	9.01874e-79
1	3951432	3952031	599	60	361	3.091e-66	0.282401	2.12314e-64	1	4191820	4192419	599	11	228	8.25382e-76	0.108214	1.01035e-73
1	3966727	3967326	599	12	262	1.28638e-77	0.110123	1.99407e-75	1	4196515	4197114	599	10	228	4.2124e-77	0.101386	5.56556e-75
1	3971720	3972319	599	45	354	1.65652e-75	0.225259	2.21639e-73	1	4221808	4222407	599	144	462	3.67381e-59	0.429114	1.61351e-57
1	3998143	3998742	599	54	379	4.3494e-76	0.244955	6.05741e-74	1	4222597	4223196	599	48	387	6.21177e-97	0.195089	2.3143e-94
1	3998799	3999398	599	69	412	5.54581e-75	0.277643	7.14525e-73	1	4224741	4225340	599	111	496	3.03041e-87	0.314405	7.07108e-85
1	4006357	4006956	599	78	499	1.92535e-94	0.253076	8.03178e-92	1	4243314	4243913	599	51	392	4.21498e-96	0.202702	1.51316e-93
1	4010260	4010859	599	48	432	1.20073e-97	0.193022	5.78691e-95	1	4250261	4250860	599	60	401	8.33851e-92	0.227694	2.44282e-89
1	4016552	4017151	599	14	315	1.45407e-93	0.101139	5.79777e-91	1	4294290	4294889	599	190	560	3.39916e-64	0.453133	2.04701e-62
1	4020345	4020944	599	71	363	1.88007e-59	0.325225	7.89863e-58	1	4319594	4320193	599	53	409	2.2361e-100	0.200366	9.66063e-98
1	4025143	4025742	599	33	287	1.86154e-64	0.217075	1.12162e-62	1	4333104	4333703	599	45	570	8.02219e-167	0.123158	1.18585e-163
1	4031190	4031789	599	34	309	1.31271e-70	0.205737	1.23742e-68	1	4334057	4334656	599	35	434	1.24557e-126	0.132699	1.15628e-123
1	4039497	4040096	599	48	426	9.91281e-96	0.195873	4.39445e-93	1	4344589	4345188	599	21	344	3.07966e-108	0.112509	1.78885e-105
1	4058595	4059194	599	21	231	3.01247e-57	0.190584	1.08206e-55	1	4347916	4348515	599	52	285	1.04884e-58	0.288516	4.48226e-57
1	4065204	4065803	599	74	405	1.608e-69	0.300613	1.40075e-67	1	4368472	4369071	599	101	607	3.46267e-130	0.233927	3.41827e-127
1	4067481	4068080	599	29	264	1.33437e-60	0.213494	6.09483e-59	1	4374958	4375557	599	71	371	1.36984e-73	0.286218	1.47007e-71
1	4069052	4069651	599	76	403	1.25152e-67	0.309372	9.51199e-66	1	4378217	4378816	599	33	300	2.61928e-79	0.186515	3.94322e-77
1	4077078	4077677	599	15	343	4.63408e-102	0.0972152	2.6459e-99	1	4379436	4380035	599	77	429	2.06984e-88	0.263926	5.12579e-86
1	4086140	4086739	599	53	312	1.12926e-56	0.295928	3.89285e-55	1	4383365	4383964	599	56	375	4.73012e-86	0.230156	1.03864e-83
1	4114490	4115089	599	34	340	1.31581e-80	0.18598	2.49899e-78	1	4386277	4386876	599	50	444	1.64579e-115	0.174881	1.18608e-112
1	4117991	4118590	599	11	232	1.99143e-68	0.117963	1.60212e-66	1	4391098	4391697	599	66	370	8.71007e-77	0.269238	1.13027e-74
1	4140411	4141010	599	33	338	6.93626e-81	0.182605	1.34278e-78	1	4394461	4395060	599	128	468	5.67651e-69	0.380196	4.60091e-67
1	4161304	4161903	599	5	216	6.00952e-71	0.077635	5.80145e-69	1	4431777	4432376	599	49	355	8.10521e-85	0.217425	1.66598e-82
1	4186208	4186807	599	36	353	5.53085e-83	0.187408	1.22349e-80	1	4432654	4433253	599	15	270	4.70571e-87	0.112761	1.08855e-84
1	4187014	4187613	599	59	398	4.56577e-78	0.251171	7.29274e-76	1	4435812	4436411	599	16	327	8.19303e-108	0.0965585	4.69143e-105
1	4190040	4190639	599	112	519	8.3374e-78	0.335714	1.30914e-75	1	4441745	4442344	599	92	412	6.7213e-73	0.322554	6.90932e-71
1	4191048	4191647	599	50	365	6.64104e-75	0.238573	8.51766e-73	1	4465902	4466501	599	28	212	2.3021e-52	0.236112	6.63919e-51
1	4206076	4206675	599	15	281	1.52077e-80	0.120028	2.87769e-78	1	4480098	4480697	599	124	608	2.7578e-114	0.281108	1.92274e-111
1	4221562	4222161	599	58	394	1.31539e-77	0.25012	2.03813e-75	1	4481231	4481830	599	129	486	1.10256e-73	0.368079	1.18967e-71
1	4222597	4223196	599	38	332	1.85013e-74	0.209114	2.29603e-72	1	4483550	4484149	599	34	308	2.86855e-81	0.1859	4.83808e-79
1	4224710	4225309	599	85	459	8.33584e-78	0.298062	1.30896e-75	1	4523532	4524131	599	18	213	4.42072e-62	0.166312	2.33288e-60
1	4230788	4231387	599	50	316	5.3955e-60	0.277748	2.3587e-58	1	4528326	4528925	599	45	326	5.04509e-78	0.22126	7.04574e-76
1	4243339	4243938	599	42	336	2.44058e-72	0.224535	2.60413e-70	1	4547144	4547743	599	40	300	4.08923e-73	0.218767	4.26328e-71
1	4245911	4246510	599	30	259	3.90461e-58	0.223943	1.4937e-56	1	4555401	4556000	599	14	210	2.71995e-65	0.140159	1.75291e-63
1	4261621	4262220	599	53	402	5.65214e-84	0.226578	1.32968e-81	1	4560765	4561364	599	37	298	5.46426e-75	0.206451	6.36767e-73
1	4292556	4293155	599	8	221	1.93466e-68	0.100479	1.55901e-66	1	4563048	4563647	599	54	327	2.98969e-71	0.25769	2.7828e-69
1	4294232	4294831	599	192	559	4.87188e-49	0.509064	9.87791e-48	1	4572001	4572600	599	38	351	4.4175e-93	0.177571	1.37693e-90
1	4314513	4315112	599	16	261	1.59893e-72	0.136148	1.72797e-70	1	4574597	4575196	599	129	491	3.72683e-75	0.364162	4.38635e-73
1	4319594	4320193	599	45	364	1.20933e-78	0.218747	2.00946e-76	1	4588553	4589152	599	63	359	2.63242e-75	0.266874	3.12406e-73
1	4323292	4323891	599	15	294	4.92855e-85	0.114412	1.23684e-82	1	4607547	4608146	599	12	226	8.7583e-74	0.116069	9.5033e-72
1	4328466	4329065	599	8	161	1.84989e-47	0.141204	3.36971e-46	1	4638154	4638753	599	57	365	7.70362e-82	0.240444	1.34243e-79
1	4333096	4333695	599	45	568	5.02982e-145	0.13727	5.55835e-142	1	4639409	4640008	599	104	448	1.12409e-76	0.329778	1.44825e-74
1	4334058	4334657	599	39	401	8.48139e-96	0.175171	3.77277e-93	1	4653485	4654084	599	48	310	4.4029e-70	0.246491	3.81274e-68
1	4335055	4335654	599	146	555	1.13207e-68	0.398456	9.28577e-67	1	4712585	4713184	599	46	300	3.14103e-68	0.246122	2.42895e-66
1	4344590	4345189	599	24	336	3.42329e-89	0.142182	1.08801e-86	1	4721224	4721823	599	134	551	2.98666e-90	0.334254	8.1045e-88
1	4355671	4356270	599	34	314	3.27097e-72	0.202275	3.4568e-70	1	4735098	4735697	599	152	594	8.33073e-93	0.346873	2.56042e-90
1	4368463	4369062	599	98	513	8.59839e-85	0.301311	2.13165e-82	1	4737633	4738232	599	62	350	4.84639e-73	0.270317	5.03235e-71
1	4374988	4375587	599	58	388	8.73593e-76	0.254186	1.19025e-73	1	4759629	4760228	599	102	496	5.16982e-93	0.291331	1.60647e-90
1	4378213	4378812	599	27	308	8.77022e-77	0.171178	1.28403e-74	1	4761458	4762057	599	23	270	4.26561e-78	0.156055	5.9794e-76
1	4383233	4383832	599	154	614	1.13171e-79	0.37665	2.01768e-77	1	4808182	4808781	599	14	276	1.32997e-90	0.104755	3.671e-88
1	4391248	4391847	599	43	353	7.47939e-77	0.217417	1.10067e-74	1	4815113	4815712	599	34	292	1.62173e-75	0.196697	1.95059e-73
1	4392170	4392769	599	34	382	2.40451e-94	0.164512	9.97526e-92	1	4816246	4816845	599	55	371	1.79074e-85	0.229178	3.81178e-83
1	4394460	4395059	599	85	437	1.61315e-71	0.313798	1.62259e-69	1	4816850	4817449	599	79	468	6.0772e-100	0.246462	2.57821e-97
1	4431721	4432320	599	27	358	2.01914e-93	0.14605	8.00381e-91	1	4846525	4847124	599	16	192	2.42827e-56	0.170169	8.94438e-55
1	4432550	4433149	599	22	315	2.99338e-84	0.142164	7.16949e-82	1	4848926	4849525	599	33	309	1.45599e-82	0.180773	2.63944e-80
1	4435812	4436411	599	15	342	1.03493e-101	0.0975149	5.83474e-99	1	4852008	4852607	599	22	301	8.99686e-91	0.134322	2.50551e-88
1	4443762	4444361	599	35	321	1.43145e-73	0.202398	1.66807e-71	1	4854083	4854682	599	105	500	2.53446e-92	0.296532	7.61833e-90
1	4466554	4467153	599	35	274	1.12623e-58	0.239329	4.47872e-57	1	4860396	4860995	599	106	485	6.05663e-87	0.30875	1.3926e-84
1	4481031	4481630	599	43	329	2.47655e-69	0.234175	2.12999e-67	1	4874550	4875149	599	34	299	4.99433e-78	0.191825	6.97745e-76
1	4483407	4484006	599	54	393	2.1649e-80	0.235791	4.04951e-78	1	4905080	4905679	599	45	298	2.47943e-68	0.243295	1.93044e-66
1	4494570	4495169	599	26	300	4.01172e-75	0.170779	5.21688e-73	1	4913129	4913728	599	57	361	1.77453e-80	0.243249	2.85995e-78
1	4502788	4503387	599	19	236	7.08573e-61	0.172481	3.29937e-59	1	4926833	4927432	599	226	706	1.31654e-86	0.41847	2.97396e-84
1	4536848	4537447	599	21	293	6.71125e-78	0.148029	1.06067e-75	1	4946892	4947491	599	116	470	2.92333e-76	0.346139	3.67202e-74
1	4554727	4555326	599	11	218	1.42571e-63	0.126069	8.05542e-62	1	4962538	4963137	599	169	547	1.98715e-70	0.41671	1.75924e-68
1	4560682	4561281	599	29	295	1.29443e-70	0.189779	1.22065e-68	1	4965772	4966371	599	72	373	1.49328e-73	0.288124	1.59857e-71
1	4563052	4563651	599	39	310	1.15992e-66	0.229745	8.21081e-65	1	5006991	5007590	599	77	410	3.70138e-82	0.276771	6.56401e-80
1	4569105	4569704	599	51	364	8.20237e-74	0.243351	9.72687e-72	1	5031609	5032208	599	28	313	6.51438e-89	0.156034	1.65437e-86
1	4570975	4571574	599	41	357	8.01786e-80	0.206412	1.44496e-77	1	5041500	5042099	599	91	466	9.81435e-91	0.280741	2.72809e-88
1	4572056	4572655	599	32	370	2.40313e-92	0.161873	9.0125e-90	1	5056312	5056911	599	51	329	3.13766e-74	0.243778	3.49688e-72
1	4576431	4577030	599	41	352	3.11433e-78	0.209502	5.03495e-76	1	5057377	5057976	599	66	338	2.69529e-66	0.29616	1.84858e-64
1	4588551	4589150	599	48	363	7.06809e-76	0.231742	9.70672e-74	1	5085494	5086093	599	33	302	4.96504e-80	0.185208	7.78684e-78
1	4607660	4608259	599	21	282	3.35932e-74	0.154155	4.0955e-72	1	5104592	5105191	599	82	465	9.78012e-97	0.256459	3.61203e-94
1	4638154	4638753	599	44	380	1.50558e-84	0.205129	3.67512e-82	1	5111716	5112315	599	23	279	1.90169e-81	0.150719	3.24121e-79
1	4641934	4642533	599	60	407	4.7894e-80	0.248944	8.74769e-78	1	5127641	5128240	599	15	233	6.813e-73	0.131905	7.00081e-71
1	4653667	4654266	599	29	298	1.36536e-71	0.187757	1.38086e-69	1	5131326	5131925	599	46	274	2.07232e-59	0.270939	9.24814e-58
1	4718371	4718970	599	13	264	4.47372e-77	0.115617	6.68369e-75	1	5138192	5138791	599	74	390	1.0398e-77	0.281646	1.42508e-75
1	4719676	4720275	599	16	247	9.40187e-68	0.144369	7.21011e-66	1	5144630	5145229	599	183	499	1.44015e-51	0.493628	3.95175e-50
1	4721244	4721843	599	104	575	1.15148e-98	0.282181	5.78495e-96	1	5146327	5146926	599	69	400	1.39274e-84	0.257895	2.82374e-82
1	4730075	4730674	599	19	302	3.92774e-83	0.132743	8.77417e-81	1	5151864	5152463	599	15	251	9.15931e-80	0.121854	1.41457e-77
1	4735113	4735712	599	112	517	2.94846e-77	0.33707	4.46278e-75	1	5153993	5154592	599	37	302	2.07349e-76	0.203558	2.63034e-74
1	4737632	4738231	599	41	354	7.21213e-79	0.208255	1.21851e-76	1	5164958	5165557	599	29	304	1.35846e-84	0.165544	2.75569e-82
1	4741725	4742324	599	37	311	1.19247e-68	0.21914	9.76612e-67	1	5178690	5179289	599	95	547	1.52399e-114	0.246778	1.0701e-111
1	4759626	4760225	599	71	505	1.50649e-101	0.230053	8.4394e-99	1	5190732	5191331	599	47	374	3.37214e-93	0.198635	1.05701e-90
1	4761443	4762042	599	20	304	1.05727e-82	0.137103	2.29682e-80	1	5201882	5202481	599	71	483	3.07889e-111	0.217032	1.96512e-108
1	4762321	4762920	599	72	430	3.41779e-78	0.275574	5.51259e-76	1	5203534	5204133	599	179	562	9.4784e-70	0.427206	8.04661e-68
1	4796403	4797002	599	17	282	1.45511e-78	0.131214	2.40831e-76	1	5212115	5212714	599	133	549	3.12005e-90	0.333239	8.46213e-88
1	4808159	4808758	599	17	325	2.43613e-93	0.11292	9.6081e-91	1	5224005	5224604	599	293	902	3.90417e-108	0.414172	2.25858e-105
1	4816338	4816937	599	50	373	2.22879e-77	0.233191	3.39929e-75	1	5227938	5228537	599	43	326	1.05409e-79	0.212921	1.62185e-77
1	4852020	4852619	599	13	300	1.33314e-89	0.100962	4.32932e-87	1	5241795	5242394	599	137	510	2.42426e-76	0.369742	3.06143e-74
1	4860398	4860997	599	77	531	7.06835e-105	0.234483	4.40972e-102	1	5256742	5257341	599	140	465	6.14536e-62	0.415372	3.21064e-60
1	4874539	4875138	599	19	316	6.54572e-88	0.126532	1.94067e-85	1	5275378	5275977	599	52	398	2.33107e-97	0.202841	8.85503e-95
1	4879211	4879810	599	120	466	2.82036e-59	0.399948	1.17069e-57	1	5305678	5306277	599	127	614	3.18853e-114	0.284365	2.21811e-111
1	4905079	4905678	599	33	272	1.05379e-59	0.229791	4.51352e-58	1	5317530	5318129	599	86	428	7.59644e-82	0.291824	1.32408e-79
1	4913147	4913746	599	40	346	3.46634e-77	0.208962	5.22358e-75	1	5328568	5329167	599	54	356	4.10067e-81	0.235604	6.85814e-79
1	4946593	4947192	599	55	427	3.85133e-90	0.219565	1.28868e-87	1	5338150	5338749	599	29	251	2.42116e-65	0.202851	1.56504e-63
1	4965798	4966397	599	39	295	5.58066e-62	0.242123	2.81219e-60	1	5344982	5345581	599	63	363	1.22523e-76	0.263778	1.57402e-74
1	4970280	4970879	599	19	257	6.67195e-68	0.157518	5.17219e-66	1	5352219	5352818	599	32	321	6.94096e-88	0.169316	1.67315e-85
1	5007561	5008160	599	36	335	3.54705e-77	0.198041	5.33861e-75	1	5359387	5359986	599	42	337	1.89241e-84	0.201558	3.80886e-82
1	5017728	5018327	599	26	286	1.64694e-70	0.179645	1.54017e-68	1	5366936	5367535	599	84	442	9.61223e-88	0.2763	2.30104e-85
1	5031611	5032210	599	28	310	1.80624e-76	0.17505	2.58787e-74	1	5368520	5369119	599	57	346	2.14099e-75	0.254373	2.55418e-73
1	5041499	5042098	599	68	426	7.435e-80	0.26467	1.34273e-77	1	5402233	5402832	599	127	572	5.80585e-101	0.306136	2.56994e-98
1	5051460	5052059	599	52	368	2.90359e-74	0.244604	3.55687e-72	1	5407167	5407766	599	81	401	1.64618e-76	0.296285	2.10018e-74
1	5056370	5056969	599	40	343	3.11088e-76	0.210889	4.38216e-74	1	5409690	5410289	599	88	404	6.54955e-73	0.316455	6.74252e-71
1	5065751	5066350	599	30	348	4.78548e-87	0.163823	1.34961e-84	1	5429051	5429650	599	47	312	1.48597e-71	0.240473	1.40842e-69
1	5067150	5067749	599	46	350	1.90788e-73	0.23226	2.20142e-71	1	5446289	5446888	599	117	460	1.09833e-72	0.356781	1.11628e-70
1	5085481	5086080	599	31	328	1.67465e-79	0.17909	2.95399e-77	1	5470882	5471481	599	68	466	8.67048e-108	0.216946	4.95742e-105
1	5093903	5094502	599	12	260	6.38882e-77	0.111023	9.45249e-75	1	5486001	5486600	599	58	456	1.17992e-112	0.193223	7.8538e-110
1	5104562	5105161	599	70	502	2.08855e-101	0.228624	1.16454e-98	1	5487366	5487965	599	81	403	3.748e-77	0.294741	4.9678e-75
1	5111729	5112328	599	14	253	4.42088e-72	0.127596	4.62761e-70	1	5495027	5495626	599	60	464	9.40997e-114	0.195394	6.46018e-111
1	5131432	5132031	599	24	304	1.85445e-78	0.158039	3.0433e-76	1	5497635	5498234	599	111	462	9.10302e-77	0.338644	1.17946e-74
1	5138193	5138792	599	53	381	1.76818e-77	0.23972	2.71639e-75	1	5501957	5502556	599	114	516	1.29863e-91	0.309049	3.76807e-89
1	5144686	5145285	599	112	445	4.87866e-58	0.394308	1.85315e-56	1	5517612	5518211	599	61	551	6.71081e-144	0.165646	8.08633e-141
1	5145726	5146325	599	28	304	1.68855e-74	0.178707	2.10242e-72	1	5535248	5535847	599	98	463	3.99784e-85	0.302032	8.35028e-83
1	5146326	5146925	599	46	408	9.87564e-92	0.197667	3.58619e-89	1	5550418	5551017	599	128	477	1.35723e-71	0.372695	1.28935e-69
1	5154238	5154837	599	67	478	2.26405e-96	0.231574	1.0332e-93	1	5554574	5555173	599	39	386	7.57991e-105	0.164186	3.91228e-102
1	5165071	5165670	599	44	368	9.58393e-81	0.212172	1.83565e-78	1	5559219	5559818	599	43	436	3.11888e-119	0.156819	2.46896e-116
1	5170471	5171070	599	36	274	7.29813e-58	0.244971	2.73791e-56	1	5584383	5584982	599	201	570	5.30363e-62	0.468697	2.78487e-60
1	5178686	5179285	599	76	450	2.71941e-81	0.275576	5.40231e-79	1	5592791	5593390	599	29	283	6.52816e-77	0.178581	8.52328e-75
1	5183311	5183910	599	113	551	4.64796e-86	0.317943	1.2401e-83	1	5611882	5612481	599	31	307	9.69738e-84	0.172947	1.87697e-81
1	5190753	5191352	599	30	428	8.60836e-114	0.131797	6.71609e-111	1	5621918	5622517	599	110	417	7.4204e-64	0.373967	4.3727e-62
1	5197696	5198295	599	9	238	4.37479e-73	0.100237	4.91835e-71	1	5629319	5629918	599	51	354	7.92414e-83	0.225659	1.45803e-80
1	5201857	5202456	599	55	434	2.49733e-92	0.215854	9.35605e-90	1	5653909	5654508	599	32	322	2.9918e-88	0.168761	7.3511e-86
1	5215015	5215614	599	65	392	6.94631e-72	0.277644	7.17124e-70	1	5670296	5670895	599	53	364	1.14843e-84	0.226485	2.33821e-82
1	5223985	5224584	599	226	708	1.26235e-68	0.463353	1.03201e-66	1	5681375	5681974	599	37	382	2.48365e-105	0.158872	1.30449e-102
1	5227930	5228529	599	35	324	1.55917e-74	0.200419	1.94639e-72	1	5685287	5685886	599	45	286	3.14203e-64	0.25412	1.89735e-62
1	5237244	5237843	599	18	285	1.84683e-78	0.13546	3.03252e-76	1	5687365	5687964	599	82	422	1.29703e-82	0.283903	2.35982e-80
1	5241633	5242232	599	114	470	1.71017e-63	0.378386	9.60804e-62	1	5704836	5705435	599	152	536	7.11534e-76	0.386077	8.73924e-74
1	5256678	5257277	599	100	428	4.44489e-60	0.370863	1.95436e-58	1	5705568	5706167	599	78	378	3.92863e-71	0.304899	3.63206e-69
1	5271939	5272538	599	104	498	8.21044e-77	0.327847	1.20472e-74	1	5711625	5712224	599	137	460	4.92223e-62	0.411864	2.59164e-60
1	5275343	5275942	599	61	358	1.18987e-64	0.289012	7.27731e-63	1	5728794	5729393	599	108	632	2.34383e-133	0.238261	2.42505e-130
1	5292251	5292850	599	47	368	3.018e-78	0.224372	4.88592e-76	1	5756537	5757136	599	75	519	1.92877e-120	0.21128	1.56846e-117
1	5294146	5294745	599	58	386	3.52702e-75	0.255571	4.60977e-73	1	5758991	5759590	599	59	415	1.89726e-97	0.216459	7.23006e-95
1	5305745	5306344	599	77	527	1.17147e-103	0.23634	7.04835e-101	1	5770489	5771088	599	59	374	2.35487e-83	0.241458	4.46522e-81
1	5315053	5315652	599	31	305	5.13913e-72	0.193391	5.35354e-70	1	5778748	5779347	599	76	414	3.56795e-84	0.270821	7.07532e-82
1	5320318	5320917	599	52	388	1.97563e-80	0.231361	3.70753e-78	1	5784802	5785401	599	152	492	1.55315e-63	0.422201	8.96481e-62
1	5328572	5329171	599	39	365	3.84735e-84	0.193382	9.14924e-82	1	5788029	5788628	599	126	453	1.06264e-65	0.387787	7.02188e-64
1	5343999	5344598	599	14	247	5.10151e-70	0.130897	4.6079e-68	1	5794454	5795053	599	19	219	2.80302e-63	0.168218	1.59478e-61
1	5347257	5347856	599	16	248	4.29782e-68	0.14375	3.37881e-66	1	5800536	5801135	599	11	220	1.03587e-72	0.112421	1.05501e-70
1	5351891	5352490	599	23	295	1.76991e-76	0.157772	2.53775e-74	1	5821734	5822333	599	43	331	1.83354e-81	0.209527	3.12765e-79
1	5359382	5359981	599	33	350	8.40267e-85	0.17601	2.08407e-82	1	5841044	5841643	599	64	361	3.02733e-75	0.268984	3.58331e-73
1	5366574	5367173	599	14	313	7.24116e-93	0.101822	2.79172e-90	1	5844257	5844856	599	62	433	3.06644e-101	0.216142	1.37299e-98
1	5367207	5367806	599	148	539	1.18989e-63	0.415952	6.77086e-62	1	5853648	5854247	599	44	342	1.75019e-84	0.206391	3.5314e-82
1	5368546	5369145	599	51	411	2.00822e-88	0.214187	6.12245e-86	1	5859674	5860273	599	28	249	1.55416e-65	0.198874	1.01757e-63
1	5402235	5402834	599	100	505	3.02079e-81	0.311904	5.98035e-79	1	5867311	5867910	599	169	570	8.24204e-77	0.399198	1.07062e-74
1	5407148	5407747	599	53	366	6.99777e-73	0.250067	7.75732e-71	1	5870539	5871138	599	32	348	8.48919e-98	0.155485	3.28665e-95
1	5470867	5471466	599	49	404	6.82077e-88	0.210753	2.01883e-85	1	5879735	5880334	599	46	327	1.51652e-77	0.224693	2.05564e-75
1	5486040	5486639	599	76	445	8.06094e-80	0.27882	1.4523e-77	1	5896033	5896632	599	44	328	1.46918e-79	0.215696	2.24382e-77
1	5495028	5495627	599	44	410	3.87069e-94	0.18939	1.59066e-91	1	5915196	5915795	599	17	285	2.0921e-90	0.116839	5.72083e-88
1	5497622	5498221	599	79	458	1.46363e-81	0.279956	2.95797e-79	1	5916237	5916836	599	75	377	8.29279e-73	0.29534	8.48217e-71
1	5501941	5502540	599	67	432	2.20382e-82	0.257456	4.6903e-80	1	5921232	5921831	599	78	336	6.01202e-58	0.345175	2.44908e-56
1	5517609	5518208	599	52	467	2.53181e-105	0.190495	1.6008e-102	1	5922946	5923545	599	47	321	1.18357e-74	0.233355	1.35176e-72
1	5535232	5535831	599	70	449	2.73289e-85	0.256928	6.97344e-83	1	5958405	5959004	599	48	368	3.23388e-90	0.205697	8.76302e-88
1	5547472	5548071	599	47	368	3.018e-78	0.224372	4.88592e-76	1	5962197	5962796	599	21	221	5.27469e-62	0.179921	2.77002e-60
1	5554417	5555016	599	49	439	5.24496e-99	0.193163	2.6714e-96	1	5974501	5975100	599	35	375	9.67145e-105	0.154705	4.97023e-102
1	5558602	5559201	599	91	470	4.70899e-77	0.30899	7.02073e-75	1	6049271	6049870	599	22	253	8.16282e-73	0.161505	8.35372e-71
1	5559220	5559819	599	46	410	2.27057e-92	0.196655	8.52832e-90	1	6060808	6061407	599	48	348	3.31082e-83	0.218167	6.2281e-81
1	5577296	5577895	599	33	350	8.40267e-85	0.17601	2.08407e-82	1	6073331	6073930	599	123	472	7.06919e-73	0.363415	7.26157e-71
1	5584330	5584929	599	146	543	1.2217e-65	0.407642	8.02982e-64	1	6097282	6097881	599	166	509	1.53455e-61	0.441873	7.82768e-60
1	5611880	5612479	599	20	364	3.22765e-103	0.113369	1.91625e-100	1	6101526	6102125	599	139	588	1.47043e-98	0.322995	5.88799e-96
1	5613841	5614440	599	8	234	5.02864e-73	0.0945322	5.63247e-71	1	6109793	6110392	599	86	468	7.33651e-95	0.265752	2.48569e-92
1	5621940	5622539	599	94	438	2.99127e-66	0.342457	2.05683e-64	1	6140643	6141242	599	53	318	5.69441e-69	0.261168	4.61464e-67
1	5629327	5629926	599	38	334	4.26699e-75	0.207793	5.5407e-73	1	6145915	6146514	599	207	636	1.26477e-76	0.429774	1.62247e-74
1	5653907	5654506	599	23	312	3.55596e-82	0.148691	7.47515e-80	1	6148813	6149412	599	41	311	3.94234e-76	0.214996	4.91771e-74
1	5678888	5679487	599	33	322	1.08465e-75	0.192195	1.4684e-73	1	6161569	6162168	599	49	337	1.44345e-78	0.229685	2.08113e-76
1	5681381	5681980	599	35	382	2.23081e-93	0.168492	8.82357e-91	1	6176512	6177111	599	14	201	7.02578e-62	0.146891	3.65985e-60
1	5685085	5685684	599	43	290	2.49028e-57	0.2676	9.0012e-56	1	6210491	6211090	599	109	458	9.79188e-77	0.336175	1.26641e-74
1	5704818	5705417	599	139	551	2.89933e-71	0.383821	2.86464e-69	1	6213297	6213896	599	30	314	2.80854e-87	0.164429	6.57009e-85
1	5705568	5706167	599	54	338	1.1167e-63	0.276349	6.3631e-62	1	6253788	6254387	599	47	315	1.38323e-72	0.238053	1.39512e-70
1	5706846	5707445	599	49	339	1.06749e-67	0.25348	8.14872e-66	1	6270552	6271151	599	61	354	4.21102e-75	0.26335	4.93797e-73
1	5728781	5729380	599	86	536	1.05792e-99	0.256118	5.53451e-97	1	6278454	6279053	599	35	297	2.09316e-76	0.197866	2.65348e-74
1	5759007	5759606	599	68	401	1.94532e-72	0.282013	2.08838e-70	1	6299154	6299753	599	14	242	1.65519e-77	0.120466	2.23845e-75
1	5764536	5765135	599	44	329	1.57532e-68	0.238764	1.27802e-66	1	6300794	6301393	599	76	405	3.20847e-81	0.277141	5.39292e-79
1	5766415	5767014	599	5	190	1.16774e-61	0.0890711	5.753e-60	1	6315175	6315774	599	62	352	1.04995e-73	0.268699	1.13404e-71
1	5770471	5771070	599	33	317	4.48157e-74	0.195399	5.41055e-72	1	6352794	6353393	599	81	396	6.59718e-75	0.300216	7.65227e-73
1	5784618	5785217	599	69	380	1.26737e-65	0.302257	8.32149e-64	1	6364399	6364998	599	233	685	7.61368e-78	0.444265	1.05079e-75
1	5794397	5794996	599	22	239	6.46876e-59	0.190559	2.61694e-57	1	6365922	6366521	599	89	412	8.61138e-75	0.313147	9.9119e-73
1	5800613	5801212	599	15	269	2.0598e-76	0.125717	2.93702e-74	1	6366583	6367182	599	40	308	6.28839e-76	0.212761	7.7478e-74
1	5816632	5817231	599	17	271	8.26727e-75	0.136871	1.05262e-72	1	6368799	6369398	599	50	464	9.9884e-123	0.166995	8.56741e-120
1	5841042	5841641	599	41	342	4.58334e-75	0.215965	5.93978e-73	1	6375954	6376553	599	75	478	2.30339e-106	0.230253	1.25589e-103
1	5844265	5844864	599	46	527	2.0549e-130	0.151216	2.0094e-127	1	6395561	6396160	599	45	286	3.14203e-64	0.25412	1.89735e-62
1	5853681	5854280	599	67	429	1.75702e-81	0.259344	3.53519e-79	1	6400031	6400630	599	60	414	2.74585e-96	0.220194	9.93309e-94
1	5859672	5860271	599	19	258	3.0778e-68	0.156869	2.44689e-66	1	6465773	6466372	599	96	435	1.39903e-77	0.316519	1.90027e-75
1	5870560	5871159	599	25	320	8.9366e-83	0.154613	1.95061e-80	1	6504508	6505107	599	47	333	8.25713e-79	0.224485	1.20628e-76
1	5879743	5880342	599	42	334	1.03475e-71	0.225954	1.05485e-69	1	6520231	6520830	599	31	196	2.11412e-44	0.278887	3.73941e-43
1	5915196	5915795	599	16	293	1.70241e-83	0.120428	3.89241e-81	1	6529235	6529834	599	126	412	4.01938e-54	0.428338	1.29081e-52
1	5916237	5916836	599	42	363	7.22025e-81	0.20697	1.3956e-78	1	6536971	6537570	599	153	518	2.89846e-70	0.402505	2.54083e-68
1	5917926	5918525	599	77	356	8.07357e-54	0.356563	2.27744e-52	1	6616973	6617572	599	311	806	5.28609e-76	0.492172	6.53561e-74
1	5919124	5919723	599	47	328	7.18294e-66	0.253306	4.79827e-64	1	6645089	6645688	599	27	285	1.36566e-79	0.167344	2.08877e-77
1	5922944	5923543	599	31	345	4.43909e-85	0.169793	1.11837e-82	1	6660578	6661177	599	17	234	5.10004e-71	0.144083	4.6751e-69
1	5958348	5958947	599	43	374	1.67155e-83	0.204583	3.82462e-81	1	6677825	6678424	599	107	500	4.97099e-91	0.301618	1.40142e-88
1	5962207	5962806	599	13	251	1.41134e-72	0.121993	1.53169e-70	1	6692495	6693094	599	56	330	9.16422e-71	0.263343	8.28346e-69
1	5974502	5975101	599	30	346	2.19235e-86	0.164821	5.95214e-84	1	6699985	6700584	599	61	348	4.21229e-73	0.268137	4.38689e-71
1	5988088	5988687	599	17	275	3.5764e-76	0.134759	5.01775e-74	1	6709001	6709600	599	34	308	2.86855e-81	0.1859	4.83808e-79
1	6006074	6006673	599	58	427	9.94228e-88	0.22987	2.91624e-85	1	6722435	6723034	599	116	489	4.94188e-82	0.332086	8.706e-80
1	6060807	6061406	599	44	363	3.6358e-79	0.21525	6.26844e-77	1	6723348	6723947	599	151	568	1.11911e-85	0.361232	2.40491e-83
1	6066905	6067504	599	12	247	2.09937e-72	0.117248	2.24775e-70	1	6730470	6731069	599	97	447	1.02926e-80	0.310492	1.68171e-78
1	6073400	6073999	599	86	500	4.77954e-89	0.275401	1.50671e-86	1	6743133	6743732	599	115	326	3.28494e-36	0.504448	3.55534e-35
1	6095472	6096071	599	81	402	3.67229e-64	0.328168	2.16643e-62	1	6762454	6763053	599	33	321	6.37501e-87	0.173639	1.46305e-84
1	6101681	6102280	599	57	421	1.14645e-86	0.229824	3.16588e-84	1	6767020	6767619	599	96	439	7.79883e-79	0.313497	1.14129e-76
1	6105580	6106179	599	4	208	1.23307e-69	0.0716975	1.08314e-67	1	6769026	6769625	599	44	329	6.5535e-80	0.215004	1.02152e-77
1	6109801	6110400	599	79	502	1.3048e-94	0.254347	5.4833e-92	1	6771630	6772229	599	214	753	1.36752e-105	0.37201	7.24944e-103
1	6140675	6141274	599	39	345	9.8237e-78	0.20521	1.53381e-75	1	6773033	6773632	599	76	440	8.59472e-93	0.254064	2.6398e-90
1	6145912	6146511	599	135	622	1.99368e-92	0.329404	7.51734e-90	1	6782367	6782966	599	53	367	1.05372e-85	0.224536	2.26954e-83
1	6148995	6149594	599	76	447	2.08024e-80	0.277513	3.89663e-78	1	6802737	6803336	599	144	465	5.53172e-60	0.426217	2.55916e-58
1	6161579	6162178	599	44	340	5.975e-72	0.230621	6.19543e-70	1	6809419	6810018	599	72	434	9.40051e-94	0.245754	3.02393e-91
1	6176442	6177041	599	22	238	1.37682e-58	0.191412	5.44368e-57	1	6814284	6814883	599	83	400	7.22087e-75	0.303562	8.35731e-73
1	6210490	6211089	599	70	419	2.38967e-76	0.276243	3.39549e-74	1	6825132	6825731	599	75	406	2.99424e-82	0.273213	5.33256e-80
1	6213301	6213900	599	27	297	3.67529e-73	0.177893	4.15426e-71	1	6825918	6826517	599	98	394	8.83653e-64	0.357723	5.18391e-62
1	6221587	6222186	599	34	380	1.09541e-93	0.165423	4.39879e-91	1	6830466	6831065	599	85	413	1.0578e-77	0.299816	1.44888e-75
1	6253819	6254418	599	32	339	3.75037e-82	0.177505	7.87248e-80	1	6831469	6832068	599	17	282	2.94055e-89	0.118157	7.59966e-87
1	6268684	6269283	599	13	233	2.25859e-66	0.132056	1.56538e-64	1	6847730	6848329	599	76	426	3.88981e-88	0.262823	9.49604e-86
1	6270538	6271137	599	50	348	1.10893e-69	0.250865	9.76555e-68	1	6855330	6855929	599	67	310	1.10272e-56	0.328774	4.15248e-55
1	6278450	6279049	599	23	322	1.53401e-85	0.143816	3.97247e-83	1	6862782	6863381	599	38	326	4.4052e-84	0.191965	8.68631e-82
1	6293917	6294516	599	18	274	1.01626e-74	0.141234	1.285e-72	1	6878306	6878905	599	51	382	1.37976e-92	0.208284	4.19749e-90
1	6299101	6299700	599	30	300	2.58934e-71	0.191624	2.56601e-69	1	6893740	6894339	599	105	480	5.23196e-86	0.30946	1.14585e-83
1	6300766	6301365	599	31	398	1.16382e-102	0.146086	6.78382e-100	1	6898922	6899521	599	21	257	2.42036e-75	0.153192	2.87787e-73
1	6315175	6315774	599	48	364	3.45568e-76	0.231072	4.8521e-74	1	6905672	6906271	599	42	336	4.28113e-84	0.202191	8.44582e-82
1	6355793	6356392	599	34	313	6.84977e-72	0.202959	7.07414e-70	1	6922748	6923347	599	32	327	4.4312e-90	0.166037	1.19252e-87
1	6366549	6367148	599	24	329	7.78283e-87	0.145376	2.17151e-84	1	6935841	6936440	599	137	454	2.31719e-60	0.417565	1.097e-58
1	6368803	6369402	599	46	359	2.98333e-76	0.22613	4.21103e-74	1	6936483	6937082	599	190	564	3.03905e-65	0.449784	1.95446e-63
1	6375964	6376563	599	54	391	8.95382e-80	0.237058	1.60711e-77	1	6941318	6941917	599	71	421	3.93125e-90	0.250617	1.06091e-87
1	6400031	6400630	599	32	372	5.24367e-93	0.160957	2.0337e-90	1	6950224	6950823	599	56	352	3.4484e-78	0.246016	4.85482e-76
1	6432288	6432887	599	141	527	4.15765e-64	0.407359	2.44475e-62	1	6974919	6975518	599	25	265	3.20597e-74	0.170012	3.57182e-72
1	6458820	6459419	599	56	404	3.28694e-82	0.236344	6.92373e-80	1	6980832	6981431	599	26	264	7.17268e-73	0.176106	7.3649e-71
1	6463204	6463803	599	49	314	4.00581e-60	0.274835	1.76686e-58	1	6986964	6987563	599	115	468	3.0777e-76	0.344972	3.85987e-74
1	6520231	6520830	599	18	210	3.04841e-53	0.187515	8.26057e-52	1	7000867	7001466	599	45	366	4.11632e-92	0.195846	1.22409e-89
1	6527847	6528446	599	19	262	1.38987e-69	0.154325	1.21632e-67	1	7013978	7014577	599	12	260	6.00606e-87	0.0999748	1.38128e-84
1	6529005	6529604	599	73	362	6.51169e-58	0.334239	2.45105e-56	1	7031589	7032188	599	15	236	4.90472e-74	0.130118	5.40153e-72
1	6536970	6537569	599	131	542	3.39679e-73	0.369906	3.85268e-71	1	7037968	7038567	599	56	399	2.36275e-94	0.215626	7.82026e-92
1	6556618	6557217	599	36	284	5.51953e-61	0.235833	2.58873e-59	1	7042025	7042624	599	14	246	4.82891e-79	0.118381	7.15575e-77
1	6581387	6581986	599	65	370	2.04792e-65	0.29503	1.32333e-63	1	7043232	7043831	599	61	352	1.95861e-74	0.264927	2.20688e-72
1	6592385	6592984	599	22	286	1.68414e-74	0.157463	2.09749e-72	1	7051296	7051895	599	39	291	8.40549e-71	0.221204	7.61525e-69
1	6635036	6635635	599	45	264	4.20475e-48	0.307217	7.99853e-47	1	7054921	7055520	599	32	229	5.70159e-55	0.242319	1.93013e-53
1	6644975	6645574	599	44	350	4.4572e-75	0.22368	5.78159e-73	1	7058756	7059355	599	31	264	3.39977e-68	0.202942	2.62067e-66
1	6656808	6657407	599	7	230	5.30356e-73	0.088516	5.92794e-71	1	7077825	7078424	599	38	252	4.42797e-58	0.252184	1.81996e-56
1	6678514	6679113	599	12	253	1.73445e-74	0.114292	2.15869e-72	1	7082955	7083554	599	129	445	7.43698e-62	0.403645	3.86887e-60
1	6681960	6682559	599	17	246	2.53365e-66	0.151703	1.74872e-64	1	7084243	7084842	599	47	354	3.81034e-86	0.210467	8.40721e-84
1	6709001	6709600	599	27	356	9.45166e-93	0.146914	3.62316e-90	1	7093120	7093719	599	25	308	3.66505e-90	0.144967	9.9054e-88
1	6711771	6712370	599	76	506	4.91701e-98	0.24376	2.40721e-95	1	7106108	7106707	599	59	385	4.15095e-87	0.234209	9.62751e-85
1	6722547	6723146	599	109	524	5.45395e-81	0.324318	1.06291e-78	1	7111802	7112401	599	22	271	1.62791e-79	0.150131	2.48111e-77
1	6762435	6763034	599	23	362	4.3165e-99	0.12711	2.20596e-96	1	7128061	7128660	599	84	411	1.00828e-77	0.298194	1.38261e-75
1	6771618	6772217	599	163	644	1.06747e-82	0.37764	2.31867e-80	1	7128969	7129568	599	61	364	1.88009e-78	0.255736	2.69129e-76
1	6782167	6782766	599	20	334	6.33057e-93	0.124127	2.44565e-90	1	7149960	7150559	599	39	274	7.15965e-65	0.23578	4.4971e-63
1	6799515	6800114	599	24	238	1.0252e-56	0.204937	3.54317e-55	1	7158011	7158610	599	40	324	1.37418e-81	0.201673	2.35835e-79
1	6809439	6810038	599	57	461	3.83013e-99	0.208973	1.9614e-96	1	7193592	7194191	599	46	325	7.51386e-77	0.226153	9.78333e-75
1	6814271	6814870	599	59	432	1.75494e-88	0.230468	5.36985e-86	1	7214686	7215285	599	22	268	2.14481e-78	0.151916	3.06173e-76
1	6825278	6825877	599	55	382	3.09175e-76	0.246802	4.35718e-74	1	7220519	7221118	599	89	568	3.7814e-126	0.223835	3.47684e-123
1	6825918	6826517	599	80	373	1.0415e-56	0.351152	3.59707e-55	1	7258689	7259288	599	25	280	9.39467e-80	0.160362	1.44947e-77
1	6830527	6831126	599	83	437	8.34648e-73	0.307228	9.20224e-71	1	7261564	7262163	599	38	294	1.04551e-72	0.214124	1.06414e-70
1	6831431	6832030	599	26	292	1.7485e-72	0.175737	1.88436e-70	1	7274520	7275119	599	43	282	2.00783e-64	0.248221	1.22574e-62
1	6847731	6848330	599	51	450	9.04262e-101	0.194767	4.92636e-98	1	7301345	7301944	599	17	246	1.48728e-75	0.136607	1.7925e-73
1	6862792	6863391	599	39	335	1.4964e-74	0.211675	1.87019e-72	1	7302186	7302785	599	225	673	2.92363e-78	0.437974	4.14096e-76
1	6870811	6871410	599	21	247	1.58492e-62	0.177458	8.29691e-61	1	7306260	7306859	599	35	346	4.11297e-94	0.168389	1.34583e-91
1	6878324	6878923	599	33	353	8.7616e-86	0.174434	2.30086e-83	1	7312143	7312742	599	45	331	9.04577e-80	0.217733	1.39764e-77
1	6881063	6881662	599	22	272	7.93659e-70	0.166072	7.06655e-68	1	7335867	7336466	599	69	327	8.95697e-61	0.318853	4.35608e-59
1	6893074	6893673	599	176	594	7.28948e-64	0.440884	4.20781e-62	1	7336753	7337352	599	88	354	1.6345e-57	0.36363	6.48164e-56
1	6898922	6899521	599	15	299	9.17537e-87	0.112388	2.54839e-84	1	7344329	7344928	599	56	341	1.82984e-74	0.254389	2.06647e-72
1	6902248	6902847	599	226	704	1.04271e-67	0.466085	7.96634e-66	1	7375444	7376043	599	51	348	9.39727e-81	0.22976	1.53896e-78
1	6905671	6906270	599	39	378	2.47231e-88	0.18639	7.49715e-86	1	7382809	7383408	599	59	297	8.85053e-58	0.307957	3.56899e-56
1	6921445	6922044	599	15	222	2.29357e-60	0.154241	1.02964e-58	1	7386560	7387159	599	30	279	1.63788e-74	0.186345	1.85627e-72
1	6922748	6923347	599	21	278	7.38161e-73	0.156508	8.17031e-71	1	7389257	7389856	599	36	323	7.88919e-85	0.185334	1.62245e-82
1	6940391	6940990	599	65	412	7.64625e-78	0.263508	1.20469e-75	1	7405993	7406592	599	109	448	1.08306e-73	0.344037	1.16886e-71
1	6941306	6941905	599	41	366	1.08303e-82	0.201071	2.35151e-80	1	7413252	7413851	599	211	658	1.1211e-80	0.422302	1.82631e-78
1	6950219	6950818	599	60	349	1.06561e-62	0.292639	5.65874e-61	1	7419368	7419967	599	52	401	2.04625e-98	0.201247	8.1403e-96
1	6974952	6975551	599	19	287	4.9437e-78	0.1401	7.87919e-76	1	7422738	7423337	599	85	436	4.18712e-85	0.28325	8.73621e-83
1	6980850	6981449	599	24	325	1.7208e-85	0.147266	4.44279e-83	1	7427199	7427798	599	23	268	2.36126e-77	0.157292	3.16845e-75
1	6986962	6987561	599	73	454	1.31812e-84	0.263509	3.22618e-82	1	7437780	7438379	599	46	313	1.07117e-72	0.235323	1.08941e-70
1	7000852	7001451	599	37	415	2.71238e-102	0.161723	1.56071e-99	1	7447211	7447810	599	22	255	1.47782e-73	0.160158	1.58283e-71
1	7013961	7014560	599	11	272	2.18469e-82	0.0995982	4.6503e-80	1	7464019	7464618	599	152	502	2.69006e-66	0.413417	1.84531e-64
1	7023380	7023979	599	16	226	1.21612e-60	0.158712	5.56655e-59	1	7470821	7471420	599	45	320	6.20219e-76	0.225644	7.64497e-74
1	7037592	7038191	599	38	377	6.33188e-89	0.182904	1.98219e-86	1	7474559	7475158	599	67	378	1.02089e-78	0.266731	1.48415e-76
1	7042234	7042833	599	32	376	2.48977e-94	0.159156	1.03177e-91	1	7483350	7483949	599	31	299	7.96154e-81	0.177846	1.30943e-78
1	7051293	7051892	599	27	305	8.55896e-76	0.17296	1.16695e-73	1	7488762	7489361	599	87	362	1.60775e-60	0.351573	7.69595e-59
1	7054921	7055520	599	22	265	1.68661e-67	0.170733	1.26854e-65	1	7492457	7493056	599	87	390	3.72557e-69	0.325072	3.04949e-67
1	7084243	7084842	599	37	358	1.09049e-83	0.188897	2.51845e-81	1	7500251	7500850	599	29	277	9.93954e-75	0.182685	1.13991e-72
1	7091908	7092507	599	58	334	1.11699e-59	0.297641	4.77317e-58	1	7514552	7515151	599	57	389	4.49314e-90	0.224865	1.20861e-87
1	7093151	7093750	599	28	295	1.49541e-71	0.184482	1.50804e-69	1	7515666	7516265	599	64	376	3.02223e-80	0.257702	4.80501e-78
1	7106104	7106703	599	58	458	2.25146e-97	0.213595	1.07245e-94	1	7524655	7525254	599	90	442	1.12848e-83	0.293811	2.17797e-81
1	7111877	7112476	599	20	288	2.77306e-77	0.14518	4.20532e-75	1	7525880	7526479	599	89	510	1.31991e-106	0.250453	7.25655e-104
1	7128128	7128727	599	80	392	5.58163e-62	0.333278	2.81231e-60	1	7546740	7547339	599	67	408	9.27502e-89	0.246163	2.33606e-86
1	7150120	7150719	599	37	290	4.83083e-62	0.235969	2.44372e-60	1	7548154	7548753	599	56	291	7.0766e-58	0.300798	2.86827e-56
1	7151215	7151814	599	14	239	2.82964e-67	0.135568	2.09575e-65	1	7556942	7557541	599	216	634	4.89851e-72	0.448605	4.78643e-70
1	7157995	7158594	599	27	306	4.00628e-76	0.172362	5.59637e-74	1	7570757	7571356	599	55	554	1.09395e-150	0.150595	1.42431e-147
1	7193592	7194191	599	43	372	7.23017e-83	0.205741	1.58882e-80	1	7572419	7573018	599	131	664	1.32346e-127	0.269647	1.25017e-124
1	7220523	7221122	599	67	576	5.16511e-127	0.190611	4.87148e-124	1	7600484	7601083	599	84	412	4.8238e-78	0.297434	6.744e-76
1	7260867	7261466	599	18	277	9.7285e-76	0.139612	1.32112e-73	1	7615036	7615635	599	101	514	1.80892e-99	0.278207	7.52851e-97
1	7274517	7275116	599	59	323	8.38434e-56	0.312951	2.71774e-54	1	7619660	7620259	599	62	480	1.12647e-117	0.194035	8.58379e-115
1	7306266	7306865	599	26	432	1.39114e-119	0.11632	1.20468e-116	1	7627927	7628526	599	50	394	1.14106e-97	0.198234	4.39588e-95
1	7312074	7312673	599	40	372	1.69219e-85	0.19361	4.37181e-83	1	7629407	7630006	599	25	245	6.74506e-67	0.184808	4.80101e-65
1	7335941	7336540	599	37	370	1.41479e-87	0.182453	4.11562e-85	1	7663247	7663846	599	18	216	3.37735e-63	0.163843	1.90907e-61
1	7336858	7337457	599	33	380	1.153e-94	0.161413	4.85592e-92	1	7667395	7667994	599	112	477	9.3447e-81	0.330175	1.53098e-78
1	7340172	7340771	599	107	482	1.23556e-70	0.348035	1.16687e-68	1	7682446	7683045	599	77	381	9.36654e-73	0.298946	9.55721e-71
1	7344327	7344926	599	58	386	3.52702e-75	0.255571	4.60977e-73	1	7685330	7685929	599	100	424	1.02556e-71	0.337262	9.82523e-70
1	7345833	7346432	599	112	501	6.78601e-73	0.348321	7.53248e-71	1	7693837	7694436	599	42	238	2.55802e-50	0.291433	6.49973e-49
1	7383144	7383743	599	27	331	2.10083e-84	0.158637	5.07715e-82	1	7698213	7698812	599	64	477	6.45203e-115	0.200788	4.57281e-112
1	7405993	7406592	599	70	445	4.33561e-84	0.259347	1.02802e-81	1	7710671	7711270	599	40	241	8.50981e-53	0.27603	2.52093e-51
1	7419415	7420014	599	78	427	3.24731e-73	0.297911	3.68919e-71	1	7712615	7713214	599	52	301	5.15108e-64	0.272301	3.06878e-62
1	7422738	7423337	599	77	398	1.47707e-65	0.317095	9.64372e-64	1	7713567	7714166	599	124	519	1.99386e-86	0.331524	4.46535e-84
1	7427195	7427794	599	27	276	2.72414e-66	0.192269	1.87713e-64	1	7716161	7716760	599	30	323	1.37505e-90	0.159592	3.79321e-88
1	7438113	7438712	599	34	301	4.73958e-68	0.211526	3.71658e-66	1	7722579	7723178	599	17	204	9.04834e-60	0.166836	4.12804e-58
1	7447192	7447791	599	28	375	4.45956e-98	0.143212	2.18759e-95	1	7723828	7724427	599	44	306	6.81948e-72	0.232115	6.59522e-70
1	7463876	7464475	599	143	471	1.83546e-49	0.464041	3.82997e-48	1	7837263	7837862	599	21	297	2.26726e-90	0.131399	6.18822e-88
1	7464984	7465583	599	35	320	2.99535e-73	0.203066	3.41011e-71	1	7854892	7855491	599	36	294	1.90581e-74	0.20472	2.14865e-72
1	7470717	7471316	599	40	308	3.21713e-65	0.236273	2.05039e-63	1	7861865	7862464	599	119	418	2.49068e-59	0.400545	1.10681e-57
1	7472901	7473500	599	66	325	6.98612e-52	0.342788	1.72124e-50	1	7866085	7866684	599	85	457	5.93792e-92	0.269631	1.7524e-89
1	7483346	7483945	599	14	273	5.59674e-79	0.117688	9.51588e-77	1	7878302	7878901	599	120	470	5.7368e-74	0.356941	6.29608e-72
1	7485363	7485962	599	8	274	3.39751e-87	0.0799251	9.67177e-85	1	7884030	7884629	599	92	427	1.32821e-77	0.310678	1.80787e-75
1	7490418	7491017	599	33	332	6.20637e-79	0.186088	1.05275e-76	1	7912801	7913400	599	108	502	5.0847e-91	0.302893	1.43301e-88
1	7492464	7493063	599	57	360	4.36962e-68	0.270921	3.43214e-66	1	7953107	7953706	599	116	430	2.19559e-64	0.379935	1.33726e-62
1	7500289	7500888	599	22	348	1.92205e-95	0.127974	8.40656e-93	1	7963495	7964094	599	29	312	1.55065e-87	0.161058	3.6728e-85
1	7514553	7515152	599	38	354	1.69103e-81	0.195434	3.40531e-79	1	7980252	7980851	599	30	270	2.92358e-71	0.192942	2.72339e-69
1	7517879	7518478	599	30	298	1.15405e-70	0.192986	1.09176e-68	1	7992993	7993592	599	59	311	2.52517e-62	0.29331	1.35287e-60
1	7518734	7519333	599	121	486	6.42672e-64	0.385642	3.72827e-62	1	7997452	7998051	599	87	477	4.08901e-97	0.263204	1.53566e-94
1	7524746	7525345	599	55	440	3.2886e-94	0.21277	1.35499e-91	1	8016912	8017511	599	62	425	1.79639e-98	0.22041	7.16223e-96
1	7525880	7526479	599	85	476	1.01134e-82	0.286932	2.19932e-80	1	8021142	8021741	599	294	747	2.26252e-68	0.505024	1.7657e-66
1	7546740	7547339	599	50	362	5.58992e-74	0.240655	6.70947e-72	1	8039804	8040403	599	37	322	1.48604e-83	0.190217	2.8501e-81
1	7551947	7552546	599	19	257	6.67195e-68	0.157518	5.17219e-66	1	8044003	8044602	599	28	220	3.48001e-55	0.226944	1.19413e-53
1	7570707	7571306	599	68	491	1.37559e-99	0.228106	7.16041e-97	1	8059013	8059612	599	15	364	1.61285e-123	0.0822283	1.40613e-120
1	7572364	7572963	599	98	622	1.02774e-116	0.246499	8.52419e-114	1	8069352	8069951	599	89	328	2.98348e-49	0.398083	7.10451e-48
1	7600456	7601055	599	51	470	3.61943e-107	0.1861	2.41439e-104	1	8080193	8080792	599	21	282	1.03047e-84	0.138814	2.1033e-82
1	7609094	7609693	599	32	266	1.18998e-58	0.22944	4.72609e-57	1	8085472	8086071	599	135	492	3.49764e-72	0.378766	3.44562e-70
1	7612266	7612865	599	27	292	1.6091e-71	0.18112	1.61918e-69	1	8097412	8098011	599	110	530	1.33257e-98	0.290984	5.34517e-96
1	7615032	7615631	599	134	546	1.2716e-72	0.374738	1.38469e-70	1	8106604	8107203	599	141	523	5.77096e-78	0.36975	8.0294e-76
1	7619650	7620249	599	50	422	9.81539e-93	0.204833	3.75892e-90	1	8109280	8109879	599	117	611	5.43539e-120	0.265306	4.37709e-117
1	7627928	7628527	599	29	301	1.43599e-72	0.185777	1.55697e-70	1	8112305	8112904	599	30	256	3.12699e-66	0.204171	2.13612e-64
1	7629435	7630034	599	27	265	1.01751e-62	0.200751	5.40897e-61	1	8134962	8135561	599	22	260	2.049e-75	0.156886	2.4491e-73
1	7645806	7646405	599	81	413	2.91163e-67	0.318998	2.1537e-65	1	8153763	8154362	599	72	358	1.05605e-68	0.300846	8.41335e-67
1	7663332	7663931	599	21	241	1.52867e-60	0.182166	6.94191e-59	1	8159736	8160335	599	100	521	2.0056e-102	0.271864	9.43303e-100
1	7665165	7665764	599	17	281	3.19658e-78	0.131709	5.16529e-76	1	8160535	8161134	599	86	389	1.80986e-69	0.322612	1.50952e-67
1	7666423	7667022	599	45	402	1.08668e-90	0.19706	3.73525e-88	1	8181101	8181700	599	344	832	7.61363e-70	0.523859	6.51071e-68
1	7685531	7686130	599	41	390	2.1477e-90	0.188078	7.26957e-88	1	8193597	8194196	599	58	359	4.96392e-79	0.248385	7.35059e-77
1	7698213	7698812	599	45	470	1.15826e-112	0.167284	8.84135e-110	1	8194235	8194834	599	35	312	8.67885e-82	0.187817	1.50763e-79
1	7710673	7711272	599	19	278	5.53879e-75	0.144913	7.13729e-73	1	8219318	8219917	599	83	401	3.46525e-75	0.302767	4.08756e-73
1	7712402	7713001	599	16	294	7.70444e-84	0.119995	1.79897e-81	1	8230601	8231200	599	19	252	1.31165e-75	0.144838	1.5863e-73
1	7713539	7714138	599	95	479	4.61951e-77	0.314801	6.89077e-75	1	8241933	8242532	599	62	438	5.65093e-103	0.213557	2.71549e-100
1	7716164	7716763	599	43	384	1.08427e-86	0.198984	2.99591e-84	1	8263305	8263904	599	46	413	4.94455e-108	0.175735	2.85315e-105
1	7723820	7724419	599	29	330	4.38274e-82	0.168568	9.15672e-80	1	8278058	8278657	599	163	498	5.574e-60	0.444543	2.57779e-58
1	7739297	7739896	599	28	269	4.20182e-63	0.20344	2.29637e-61	1	8294522	8295121	599	39	308	8.64682e-77	0.208303	1.12228e-74
1	7747424	7748023	599	35	350	6.25443e-83	0.184746	1.37815e-80	1	8296769	8297368	599	33	291	4.57517e-76	0.192628	5.68514e-74
1	7837275	7837874	599	23	314	7.56353e-83	0.147691	1.65999e-80	1	8299394	8299993	599	60	324	6.9768e-66	0.285013	4.66581e-64
1	7854893	7855492	599	31	326	7.54586e-79	0.18025	1.27288e-76	1	8311798	8312397	599	174	614	1.04506e-86	0.379534	2.37475e-84
1	7861871	7862470	599	82	396	7.22589e-62	0.337041	3.60945e-60	1	8315847	8316446	599	46	289	1.77049e-64	0.256053	1.08443e-62
1	7866078	7866677	599	58	384	1.42179e-74	0.25697	1.78172e-72	1	8330278	8330877	599	186	585	1.10939e-72	0.424525	1.12714e-70
1	7878537	7879136	599	60	410	5.85179e-81	0.247032	1.13716e-78	1	8336166	8336765	599	88	456	1.52805e-89	0.278726	4.00542e-87
1	7884032	7884631	599	61	348	1.01642e-61	0.297769	5.0231e-60	1	8366645	8367244	599	31	282	1.15231e-74	0.189223	1.31718e-72
1	7886230	7886829	599	11	256	8.65955e-77	0.106223	1.26859e-74	1	8397828	8398427	599	45	313	1.66675e-73	0.23098	1.77734e-71
1	7897422	7898021	599	35	335	4.48169e-78	0.193479	7.16269e-76	1	8403987	8404586	599	80	431	6.15007e-87	0.271676	1.41355e-84
1	7912780	7913379	599	92	445	2.14541e-69	0.330398	1.8517e-67	1	8411712	8412311	599	81	436	7.10245e-88	0.271382	1.71094e-85
1	7954263	7954862	599	150	482	5.78997e-49	0.473246	1.16824e-47	1	8422625	8423224	599	84	392	1.10988e-71	0.313391	1.06106e-69
1	7963501	7964100	599	27	334	2.10903e-85	0.157134	5.41519e-83	1	8438514	8439113	599	59	347	3.08865e-74	0.261283	3.44478e-72
1	7979554	7980153	599	18	263	5.43371e-71	0.147514	5.2627e-69	1	8458653	8459252	599	89	414	2.01614e-75	0.311559	2.41053e-73
1	7980342	7980941	599	28	326	9.54662e-82	0.165986	1.9508e-79	1	8481756	8482355	599	36	332	4.44787e-88	0.180034	1.08272e-85
1	7997450	7998049	599	77	467	1.29528e-85	0.268161	3.36814e-83	1	8508585	8509184	599	51	373	1.95183e-89	0.213573	5.08585e-87
1	8016887	8017486	599	44	434	6.94749e-102	0.178419	3.9408e-99	1	8523685	8524284	599	160	616	7.66088e-95	0.35011	2.59283e-92
1	8039806	8040405	599	32	336	3.58689e-81	0.179177	7.07048e-79	1	8552146	8552745	599	88	396	2.10327e-70	0.323173	1.85784e-68
1	8059014	8059613	599	14	335	1.50477e-100	0.0947737	8.13064e-98	1	8556916	8557515	599	37	332	3.7681e-87	0.184173	8.75673e-85
1	8069358	8069957	599	64	344	1.49608e-58	0.314284	5.89563e-57	1	8599183	8599782	599	135	445	7.55625e-59	0.420727	3.25417e-57
1	8080216	8080815	599	23	288	3.84081e-74	0.161836	4.66374e-72	1	8643171	8643770	599	65	416	5.24793e-93	0.234892	1.62972e-90
1	8085451	8086050	599	88	460	3.89948e-76	0.306711	5.45591e-74	1	8651083	8651682	599	64	414	4.19358e-93	0.23291	1.30842e-90
1	8097411	8098010	599	77	498	7.0846e-95	0.250731	3.0176e-92	1	8655310	8655909	599	17	264	2.17501e-82	0.126724	3.90986e-80
1	8106636	8107235	599	82	466	7.62423e-82	0.284161	1.56996e-79	1	8657772	8658371	599	92	443	1.12607e-82	0.298927	2.05696e-80
1	8109292	8109891	599	95	543	1.89632e-95	0.276155	8.29563e-93	1	8664983	8665582	599	136	532	2.17889e-83	0.351436	4.13978e-81
1	8110128	8110727	599	101	470	6.98712e-71	0.339246	6.71288e-69	1	8676098	8676697	599	77	392	2.66677e-76	0.290134	3.35711e-74
1	8112293	8112892	599	32	300	1.7009e-69	0.20197	1.47847e-67	1	8678083	8678682	599	55	397	1.75092e-94	0.213425	5.83137e-92
1	8134400	8134999	599	47	318	8.05473e-63	0.261726	4.30825e-61	1	8684976	8685575	599	100	482	7.34303e-90	0.294888	1.95568e-87
1	8136449	8137048	599	14	252	9.75993e-72	0.128135	9.96955e-70	1	8688142	8688741	599	78	389	1.17068e-74	0.295841	1.33763e-72
1	8137758	8138357	599	25	252	2.43488e-60	0.199169	1.09099e-58	1	8692346	8692945	599	93	424	5.03374e-76	0.316023	6.2327e-74
1	8139833	8140432	599	77	426	1.35985e-73	0.295257	1.58787e-71	1	8694391	8694990	599	23	345	2.6768e-106	0.120411	1.4562e-103
1	8153832	8154431	599	56	388	2.65387e-77	0.246593	4.02737e-75	1	8713920	8714519	599	37	327	2.37651e-85	0.187147	5.01987e-83
1	8159532	8160131	599	44	408	1.70001e-93	0.190364	6.76073e-91	1	8737907	8738506	599	51	421	2.25295e-106	0.188069	1.22874e-103
1	8193548	8194147	599	33	320	4.8102e-75	0.193464	6.22721e-73	1	8740401	8741000	599	82	453	9.2164e-93	0.263575	2.828e-90
1	8194156	8194755	599	43	357	4.09151e-78	0.214851	6.55815e-76	1	8741442	8742041	599	29	282	1.5099e-76	0.179252	1.93007e-74
1	8219290	8219889	599	37	369	2.98716e-87	0.182973	8.5316e-85	1	8755654	8756253	599	22	272	6.88837e-80	0.149545	1.07278e-77
1	8240536	8241135	599	49	343	6.388e-69	0.250364	5.33171e-67	1	8759247	8759846	599	55	346	6.40305e-77	0.246651	8.36325e-75
1	8241933	8242532	599	42	416	6.87324e-98	0.179349	3.34603e-95	1	8762503	8763102	599	34	343	5.51712e-94	0.165928	1.79433e-91
1	8263257	8263856	599	62	419	3.51251e-82	0.248445	7.39006e-80	1	8794016	8794615	599	134	452	2.69523e-61	0.411106	1.35289e-59
1	8271989	8272588	599	25	338	8.33378e-89	0.145935	2.59494e-86	1	8861094	8861693	599	54	347	4.91466e-78	0.242047	6.86748e-76
1	8294522	8295121	599	28	330	4.52861e-83	0.163862	1.00647e-80	1	8868793	8869392	599	117	476	1.72134e-77	0.344242	2.32608e-75
1	8299335	8299934	599	52	346	1.4794e-67	0.261014	1.11801e-65	1	8887830	8888429	599	29	244	7.75179e-63	0.209051	4.28806e-61
1	8304921	8305520	599	15	233	4.23568e-64	0.146482	2.48689e-62	1	8918205	8918804	599	52	333	8.13935e-75	0.244727	9.38971e-73
1	8311647	8312246	599	39	410	9.81954e-99	0.171136	4.94584e-96	1	8922052	8922651	599	50	395	5.05391e-98	0.197707	1.9774e-95
1	8330279	8330878	599	149	590	4.29508e-76	0.380895	5.98576e-74	1	8925445	8926044	599	104	467	1.44076e-82	0.315745	2.61289e-80
1	8336100	8336699	599	32	355	2.11926e-87	0.169082	6.10392e-85	1	8954872	8955471	599	74	390	1.0398e-77	0.281646	1.42508e-75
1	8366641	8367240	599	28	312	3.97054e-77	0.173864	5.95586e-75	1	8958536	8959135	599	28	225	5.89651e-57	0.221562	2.25679e-55
1	8372905	8373504	599	14	281	9.54048e-82	0.114137	1.95047e-79	1	8973738	8974337	599	44	377	6.29853e-97	0.186263	2.34548e-94
1	8393328	8393927	599	36	368	7.45671e-88	0.179373	2.20331e-85	1	8975003	8975602	599	64	358	2.98962e-74	0.271358	3.33723e-72
1	8399536	8400135	599	49	358	1.56351e-73	0.239322	1.81818e-71	1	8977970	8978569	599	23	291	6.24341e-86	0.14414	1.36097e-83
1	8403987	8404586	599	70	438	5.39389e-82	0.263692	1.12069e-79	1	8996527	8997126	599	76	439	1.85314e-92	0.25467	5.60235e-90
1	8404662	8405261	599	30	333	4.23212e-82	0.171615	8.84895e-80	1	9001926	9002525	599	86	393	1.00966e-70	0.319163	9.09482e-69
1	8406488	8407087	599	52	348	3.6637e-68	0.259433	2.89224e-66	1	9017606	9018205	599	70	317	5.52398e-57	0.333672	2.1184e-55
1	8411752	8412351	599	96	432	1.95989e-63	0.354057	1.09726e-61	1	9024113	9024712	599	127	590	1.30235e-106	0.296415	7.16217e-104
1	8438490	8439089	599	53	418	5.76985e-89	0.217483	1.81005e-86	1	9029315	9029914	599	132	502	9.75826e-77	0.363359	1.2622e-74
1	8469320	8469919	599	50	388	4.8152e-82	0.22372	1.00308e-79	1	9056564	9057163	599	132	502	9.75826e-77	0.363359	1.2622e-74
1	8481758	8482357	599	29	344	1.02904e-86	0.161339	2.84703e-84	1	9065845	9066444	599	76	504	1.80659e-114	0.220413	1.26607e-111
1	8498609	8499208	599	46	360	1.45265e-76	0.225468	2.0959e-74	1	9070152	9070751	599	75	345	1.30053e-62	0.324256	7.09175e-61
1	8523689	8524288	599	128	547	3.56916e-76	0.35873	5.00852e-74	1	9075643	9076242	599	40	304	1.60909e-74	0.215723	1.82461e-72
1	8541501	8542100	599	35	386	1.08309e-94	0.166657	4.5721e-92	1	9076496	9077095	599	15	233	6.813e-73	0.131905	7.00081e-71
1	8552147	8552746	599	59	388	4.88463e-75	0.257977	6.31603e-73	1	9079408	9080007	599	38	320	6.16409e-82	0.195768	1.07877e-79
1	8556920	8557519	599	26	310	1.96344e-78	0.164957	3.2138e-76	1	9095504	9096103	599	133	493	1.50003e-73	0.372851	1.60541e-71
1	8599183	8599782	599	87	441	2.21323e-71	0.317317	2.20337e-69	1	9128310	9128909	599	43	321	5.99937e-78	0.216425	8.33958e-76
1	8637076	8637675	599	34	325	9.42085e-76	0.19505	1.28071e-73	1	9167312	9167911	599	43	410	9.36351e-110	0.167265	5.71156e-107
1	8643172	8643771	599	44	384	8.04442e-86	0.202883	2.11711e-83	1	9170958	9171557	599	30	285	1.09397e-76	0.182188	1.41054e-74
1	8651106	8651705	599	40	420	4.68229e-101	0.170433	2.57746e-98	1	9172583	9173182	599	73	414	2.52353e-86	0.261373	5.61789e-84
1	8655321	8655920	599	13	261	4.89943e-76	0.117029	6.80095e-74	1	9182119	9182718	599	87	461	7.29456e-92	0.27277	2.14169e-89
1	8657770	8658369	599	82	453	4.57659e-78	0.292703	7.30916e-76	1	9184115	9184714	599	16	242	3.60797e-75	0.132865	4.25082e-73
1	8664983	8665582	599	76	446	4.09573e-80	0.278165	7.52539e-78	1	9207033	9207632	599	82	448	4.10421e-91	0.266657	1.16186e-88
1	8676077	8676676	599	75	418	1.29096e-72	0.29427	1.40522e-70	1	9211246	9211845	599	46	462	8.10289e-126	0.156252	7.39992e-123
1	8678066	8678665	599	48	383	4.02914e-82	0.219027	8.44087e-80	1	9243464	9244063	599	96	417	5.54171e-72	0.330862	5.39198e-70
1	8684972	8685571	599	57	434	1.06428e-90	0.222611	3.66097e-88	1	9244542	9245141	599	62	435	6.2123e-102	0.2151	2.86384e-99
1	8688130	8688729	599	41	339	4.06091e-74	0.217981	4.91538e-72	1	9261993	9262592	599	26	312	1.32952e-90	0.147535	3.66982e-88
1	8694260	8694859	599	106	583	1.21195e-99	0.282962	6.32285e-97	1	9272407	9273006	599	49	367	5.14205e-89	0.209945	1.31215e-86
1	8713925	8714524	599	28	296	7.04415e-72	0.183822	7.26812e-70	1	9275206	9275805	599	18	247	8.06406e-75	0.142003	9.30803e-73
1	8718399	8718998	599	23	289	1.78235e-74	0.161243	2.21632e-72	1	9281986	9282585	599	38	300	7.944e-75	0.209593	9.17519e-73
1	8719417	8720016	599	36	308	1.49573e-68	0.216422	1.2167e-66	1	9292450	9293049	599	55	334	7.39726e-73	0.256007	7.58716e-71
1	8728675	8729274	599	41	360	8.88804e-81	0.204601	1.70753e-78	1	9303379	9303978	599	36	311	1.62186e-80	0.192898	2.61916e-78
1	8737944	8738543	599	25	482	6.08831e-138	0.100532	6.33681e-135	1	9314796	9315395	599	90	467	9.6117e-92	0.277362	2.80704e-89
1	8740401	8741000	599	63	458	2.3826e-93	0.229495	9.40566e-91	1	9321530	9322129	599	99	461	7.55187e-84	0.306181	1.47115e-81
1	8741426	8742025	599	18	289	8.00403e-80	0.133474	1.44296e-77	1	9322685	9323284	599	213	570	4.88536e-57	0.494663	1.88202e-55
1	8755584	8756183	599	33	336	3.106e-80	0.183751	5.7562e-78	1	9324473	9325072	599	10	201	1.29106e-66	0.116015	9.02881e-65
1	8759233	8759832	599	38	377	6.33188e-89	0.182904	1.98219e-86	1	9362773	9363372	599	40	312	2.44114e-77	0.209878	3.27131e-75
1	8794146	8794745	599	58	393	2.64955e-77	0.250789	4.02175e-75	1	9368160	9368759	599	115	500	5.10617e-86	0.321921	1.11908e-83
1	8856676	8857275	599	36	269	2.60754e-56	0.249806	8.76664e-55	1	9376439	9377038	599	139	503	3.12119e-73	0.380119	3.27749e-71
1	8866502	8867101	599	64	420	5.5145e-81	0.254773	1.07414e-78	1	9380442	9381041	599	76	398	6.20307e-79	0.282263	9.13423e-77
1	8868792	8869391	599	106	502	1.03868e-76	0.330744	1.5132e-74	1	9394299	9394898	599	54	418	1.08528e-102	0.199014	5.16019e-100
1	8875257	8875856	599	9	264	3.01209e-82	0.0897675	6.36482e-80	1	9401299	9401898	599	109	397	1.47754e-58	0.390537	6.25309e-57
1	8876434	8877033	599	11	243	2.96779e-72	0.112281	3.14814e-70	1	9401910	9402509	599	178	633	4.68438e-90	0.375495	1.25837e-87
1	8888691	8889290	599	26	315	4.29977e-80	0.162191	7.88013e-78	1	9426428	9427027	599	27	363	1.24303e-108	0.129609	7.31638e-106
1	8903826	8904425	599	94	508	5.70006e-86	0.293252	1.51228e-83	1	9432835	9433434	599	94	417	3.26233e-73	0.324683	3.41973e-71
1	8909684	8910283	599	20	301	1.1018e-81	0.13855	2.24358e-79	1	9433968	9434567	599	85	439	4.45259e-86	0.281222	9.79503e-84
1	8913846	8914445	599	95	473	2.25734e-75	0.318979	2.98956e-73	1	9446180	9446779	599	74	378	8.2926e-74	0.291053	9.00772e-72
1	8922040	8922639	599	39	415	2.27638e-100	0.168972	1.22159e-97	1	9459412	9460011	599	24	262	4.10001e-74	0.166609	4.53642e-72
1	8925444	8926043	599	72	486	5.59018e-95	0.242423	2.38927e-92	1	9464475	9465074	599	45	310	1.81998e-72	0.233343	1.82379e-70
1	8941314	8941913	599	39	259	6.27812e-51	0.277969	1.44896e-49	1	9475120	9475719	599	127	586	2.36928e-105	0.298522	1.24541e-102
1	8954944	8955543	599	50	384	8.51118e-81	0.22617	1.63722e-78	1	9484660	9485259	599	145	588	5.10644e-95	0.335728	1.74139e-92
1	8958540	8959139	599	22	264	3.62217e-67	0.17142	2.65721e-65	1	9497848	9498447	599	79	397	1.4566e-76	0.292863	1.86277e-74
1	8973737	8974336	599	39	423	5.4505e-103	0.165621	3.21123e-100	1	9498690	9499289	599	104	439	6.51771e-74	0.336865	7.13082e-72
1	8977968	8978567	599	11	278	1.72095e-84	0.097319	4.18637e-82	1	9505124	9505723	599	178	600	1.05749e-80	0.397003	1.72591e-78
1	8985398	8985997	599	21	266	7.62796e-69	0.164012	6.32939e-67	1	9516713	9517312	599	110	494	3.02894e-87	0.313165	7.06814e-85
1	8995425	8996024	599	20	281	6.38973e-75	0.149017	8.20228e-73	1	9520442	9521041	599	99	553	1.24061e-113	0.253178	8.48714e-111
1	8996528	8997127	599	51	399	1.15747e-84	0.220956	2.8432e-82	1	9532859	9533458	599	141	536	8.89914e-82	0.360397	1.54485e-79
1	9001926	9002525	599	52	362	1.99764e-72	0.248874	2.14205e-70	1	9565938	9566537	599	81	385	2.11789e-71	0.309237	1.98944e-69
1	9020012	9020611	599	48	361	2.95371e-75	0.233094	3.88121e-73	1	9569308	9569907	599	43	334	1.60509e-82	0.207542	2.90501e-80
1	9024113	9024712	599	79	542	1.05372e-106	0.234784	6.93836e-104	1	9570234	9570833	599	41	307	1.00089e-74	0.217959	1.14765e-72
1	9056545	9057144	599	106	534	1.20228e-85	0.310079	3.13058e-83	1	9580441	9581040	599	108	434	4.80177e-70	0.352729	4.15032e-68
1	9065205	9065804	599	33	278	1.33821e-61	0.224532	6.55866e-60	1	9591413	9592012	599	27	312	1.45068e-89	0.152055	3.80552e-87
1	9065844	9066443	599	34	531	2.589e-144	0.116517	2.84352e-141	1	9616172	9616771	599	73	338	1.10917e-61	0.323543	5.70584e-60
1	9070148	9070747	599	41	388	9.47411e-90	0.189097	3.10202e-87	1	9627265	9627864	599	133	516	2.54359e-80	0.355507	4.05818e-78
1	9075641	9076240	599	27	295	1.66805e-72	0.17917	1.8e-70	1	9634264	9634863	599	49	396	2.99417e-99	0.193809	1.2348e-96
1	9076430	9077029	599	18	293	3.45704e-81	0.131545	6.82903e-79	1	9634864	9635463	599	30	275	4.58315e-73	0.189221	4.76744e-71
1	9079407	9080006	599	47	345	4.25757e-71	0.240156	4.15403e-69	1	9639080	9639679	599	98	378	5.31272e-59	0.373657	2.31343e-57
1	9081096	9081695	599	113	449	1.51037e-58	0.393781	5.946e-57	1	9643006	9643605	599	86	450	5.73884e-89	0.276891	1.46219e-86
1	9083488	9084087	599	57	376	6.70414e-73	0.258801	7.44503e-71	1	9646663	9647262	599	180	649	1.33122e-93	0.369675	4.25558e-91
1	9089072	9089671	599	67	361	1.81531e-61	0.310905	8.81313e-60	1	9661656	9662255	599	145	628	3.16719e-107	0.313506	1.7787e-104
1	9095523	9096122	599	88	420	6.95555e-65	0.337389	4.33016e-63	1	9663237	9663836	599	87	398	1.16756e-71	0.31821	1.11345e-69
1	9115286	9115885	599	27	310	1.91774e-77	0.170011	2.93774e-75	1	9671222	9671821	599	107	551	2.30115e-107	0.27254	1.29847e-104
1	9116726	9117325	599	25	218	2.13982e-49	0.232453	4.44749e-48	1	9683229	9683828	599	64	559	5.09221e-144	0.170139	6.14865e-141
1	9155950	9156549	599	18	297	1.48818e-82	0.12967	3.2056e-80	1	9693997	9694596	599	108	452	1.6879e-75	0.338026	2.02792e-73
1	9167241	9167840	599	35	361	1.65166e-86	0.178821	4.51961e-84	1	9738210	9738809	599	55	287	2.90933e-57	0.300535	1.13443e-55
1	9171013	9171612	599	25	330	4.02682e-86	0.14967	1.07817e-83	1	9741845	9742444	599	84	518	5.07127e-113	0.234052	3.41105e-110
1	9172570	9173169	599	60	380	6.78252e-72	0.267562	7.01047e-70	1	9744694	9745293	599	61	336	3.99091e-69	0.278245	3.26033e-67
1	9173429	9174028	599	3	186	2.47474e-63	0.0702456	1.37543e-61	1	9748230	9748829	599	53	383	2.91625e-91	0.214679	8.31659e-89
1	9182119	9182718	599	74	421	3.63608e-74	0.288635	4.42464e-72	1	9773737	9774336	599	84	568	4.27613e-130	0.212604	4.21533e-127
1	9184116	9184715	599	20	313	9.2358e-86	0.132938	2.42357e-83	1	9798748	9799347	599	85	404	7.77597e-75	0.306831	8.9852e-73
1	9207030	9207629	599	63	415	3.22071e-80	0.254478	5.96283e-78	1	9829344	9829943	599	122	474	4.97461e-74	0.359139	5.47706e-72
1	9211257	9211856	599	35	483	5.56918e-127	0.131751	5.25117e-124	1	9829952	9830551	599	42	300	1.90706e-71	0.227912	1.79698e-69
1	9217725	9218324	599	47	383	5.93951e-83	0.215138	1.31124e-80	1	9831722	9832321	599	142	486	8.07834e-67	0.401796	5.72384e-65
1	9225840	9226439	599	11	226	2.41022e-66	0.121308	1.66726e-64	1	9834610	9835209	599	149	613	3.03876e-100	0.329607	1.30498e-97
1	9232001	9232600	599	28	312	3.97054e-77	0.173864	5.95586e-75	1	9840081	9840680	599	18	274	4.81944e-85	0.127179	1.00164e-82
1	9243472	9244071	599	100	496	1.02951e-78	0.317819	1.71997e-76	1	9852493	9853092	599	33	266	3.91269e-67	0.211882	2.82671e-65
1	9244555	9245154	599	62	393	2.46675e-74	0.26573	3.03706e-72	1	9857431	9858030	599	91	496	1.56364e-100	0.263009	6.79663e-98
1	9247843	9248442	599	72	434	2.24236e-79	0.272912	3.9169e-77	1	9875269	9875868	599	32	294	4.52966e-78	0.185803	6.34173e-76
1	9249832	9250431	599	30	301	1.22591e-71	0.19095	1.24292e-69	1	9949523	9950122	599	68	371	1.09325e-75	0.27558	1.32644e-73
1	9261904	9262503	599	21	294	3.08918e-78	0.147496	4.99825e-76	1	9970682	9971281	599	185	564	1.67281e-67	0.43881	1.23613e-65
1	9265068	9265667	599	92	371	2.07914e-49	0.399913	4.32544e-48	1	9975882	9976481	599	42	304	7.70467e-73	0.22474	7.8969e-71
1	9268493	9269092	599	17	252	2.36245e-68	0.147862	1.8933e-66	1	10000700	10001299	599	23	284	2.58859e-83	0.147908	4.89922e-81
1	9272404	9273003	599	23	293	8.2432e-76	0.158912	1.12578e-73	1	10020203	10020802	599	91	418	2.08733e-75	0.314611	2.49308e-73
1	9281985	9282584	599	32	322	1.30679e-76	0.18741	1.89137e-74	1	10024658	10025257	599	39	331	5.69221e-85	0.193042	1.17854e-82
1	9298388	9298987	599	55	359	2.98033e-69	0.263468	2.54974e-67	1	10036024	10036623	599	45	290	1.35907e-65	0.250408	8.92952e-64
1	9303379	9303978	599	45	342	9.17661e-72	0.233598	9.38918e-70	1	10044093	10044692	599	50	367	3.56255e-88	0.213599	8.70775e-86
1	9314798	9315397	599	57	434	1.06428e-90	0.222611	3.66097e-88	1	10067173	10067772	599	52	371	6.5638e-88	0.218389	1.58506e-85
1	9315855	9316454	599	46	431	4.21658e-99	0.186615	2.15643e-96	1	10086280	10086879	599	155	540	1.84542e-75	0.390032	2.21133e-73
1	9321593	9322192	599	84	444	3.71198e-74	0.305386	4.51385e-72	1	10092120	10092719	599	47	319	5.79731e-74	0.2349	6.35953e-72
1	9322967	9323566	599	85	508	4.23411e-92	0.268067	1.56913e-89	1	10096990	10097589	599	38	432	9.30099e-123	0.142757	7.98389e-120
1	9357078	9357677	599	33	350	8.40267e-85	0.17601	2.08407e-82	1	10098385	10098984	599	62	450	3.76015e-107	0.207594	2.10611e-104
1	9362776	9363375	599	21	354	1.26775e-98	0.121225	6.35067e-96	1	10101815	10102414	599	73	450	2.13613e-98	0.239496	8.49009e-96
1	9368161	9368760	599	68	524	8.19456e-110	0.213123	5.85947e-107	1	10108017	10108616	599	143	476	1.62912e-63	0.413272	9.39706e-62
1	9394298	9394897	599	30	387	5.13965e-100	0.146493	2.7222e-97	1	10109042	10109641	599	102	350	9.36893e-49	0.420017	2.16361e-47
1	9401299	9401898	599	88	420	6.95555e-65	0.337389	4.33016e-63	1	10112488	10113087	599	48	276	1.32871e-58	0.278762	5.64179e-57
1	9401911	9402510	599	137	612	1.55674e-88	0.339534	4.77557e-86	1	10135808	10136407	599	76	416	7.83202e-85	0.269455	1.61098e-82
1	9411069	9411668	599	58	382	5.72252e-74	0.258385	6.86146e-72	1	10150062	10150661	599	47	396	5.04342e-101	0.187051	2.23928e-98
1	9424484	9425083	599	151	545	1.11252e-63	0.418815	6.3408e-62	1	10157037	10157636	599	52	483	9.991e-128	0.165599	9.45648e-125
1	9426381	9426980	599	39	365	3.84735e-84	0.193382	9.14924e-82	1	10189782	10190381	599	26	266	1.32866e-73	0.1747	1.42679e-71
1	9433787	9434386	599	118	446	3.36891e-55	0.412411	1.04619e-53	1	10216348	10216947	599	78	401	1.55416e-78	0.286547	2.23565e-76
1	9446530	9447129	599	72	405	7.32561e-71	0.293449	7.02692e-69	1	10242338	10242937	599	26	273	3.59386e-76	0.169949	4.49281e-74
1	9448552	9449151	599	14	256	4.10331e-73	0.126007	4.62513e-71	1	10250943	10251542	599	46	248	9.05752e-51	0.30122	2.36652e-49
1	9459626	9460225	599	60	318	1.04555e-53	0.322822	2.92787e-52	1	10255629	10256228	599	29	295	2.71038e-81	0.170894	4.57488e-79
1	9464481	9465080	599	32	364	2.30021e-90	0.164683	7.77122e-88	1	10259757	10260356	599	122	464	4.52955e-71	0.367241	4.1709e-69
1	9475121	9475720	599	71	596	6.23743e-130	0.193551	6.07272e-127	1	10285765	10286364	599	44	325	1.65128e-78	0.217799	2.37002e-76
1	9484656	9485255	599	123	579	9.41794e-88	0.32606	2.76768e-85	1	10287858	10288457	599	148	527	2.1804e-75	0.383463	2.59936e-73
1	9500581	9501180	599	8	233	1.13383e-72	0.0949649	1.2387e-70	1	10295783	10296382	599	20	109	2.4679e-23	0.372407	1.27484e-22
1	9509185	9509784	599	40	323	6.47835e-70	0.224692	5.80677e-68	1	10300136	10300735	599	131	522	3.01828e-83	0.346423	5.69005e-81
1	9515259	9515858	599	118	472	7.16384e-62	0.38866	3.57915e-60	1	10301080	10301679	599	28	409	6.84055e-125	0.11772	6.13175e-122
1	9516713	9517312	599	75	464	3.7746e-86	0.263775	1.01283e-83	1	10305661	10306260	599	118	534	9.9077e-95	0.307644	3.33451e-92
1	9520443	9521042	599	59	526	4.91813e-118	0.187576	4.16559e-115	1	10308893	10309492	599	43	368	1.31439e-94	0.187387	4.40104e-92
1	9527792	9528391	599	88	441	9.42836e-71	0.320564	8.97261e-69	1	10309923	10310522	599	112	624	8.85061e-128	0.249499	8.38516e-125
1	9532857	9533456	599	95	472	4.30984e-75	0.319686	5.59471e-73	1	10318679	10319278	599	42	346	1.19964e-87	0.196034	2.85813e-85
1	9539452	9540051	599	33	335	6.56979e-80	0.18433	1.19058e-77	1	10320101	10320700	599	54	365	3.30627e-84	0.22949	6.56816e-82
1	9569309	9569908	599	21	378	7.40739e-107	0.113137	4.89793e-104	1	10327739	10328338	599	65	463	3.3959e-109	0.209967	2.03527e-106
1	9588998	9589597	599	32	327	3.09015e-78	0.184386	4.9983e-76	1	10328526	10329125	599	82	367	4.24229e-65	0.32877	2.69989e-63
1	9591416	9592015	599	18	355	1.67356e-102	0.107406	9.70323e-100	1	10347660	10348259	599	19	286	1.84871e-88	0.126626	4.58785e-86
1	9601258	9601857	599	178	610	8.56279e-67	0.433356	6.12152e-65	1	10353550	10354149	599	53	372	1.95152e-87	0.221361	4.60288e-85
1	9616070	9616669	599	53	411	8.8925e-87	0.221372	2.47259e-84	1	10366024	10366623	599	38	269	5.92916e-64	0.235281	3.51865e-62
1	9630334	9630933	599	45	317	4.81857e-64	0.253086	2.81866e-62	1	10368155	10368754	599	20	271	1.14738e-81	0.139446	1.97929e-79
1	9634263	9634862	599	37	362	5.54512e-85	0.1867	1.38875e-82	1	10370810	10371409	599	31	312	1.44728e-85	0.170017	3.09561e-83
1	9634863	9635462	599	25	261	2.8473e-63	0.191875	1.57403e-61	1	10378759	10379358	599	98	547	2.29182e-112	0.253752	1.5124e-109
1	9646650	9647249	599	139	562	4.02832e-74	0.375993	4.87869e-72	1	10386801	10387400	599	46	506	5.56119e-142	0.142074	6.5245e-139
1	9661649	9662248	599	99	535	1.92556e-90	0.291029	6.54268e-88	1	10388946	10389545	599	86	456	6.32047e-91	0.273077	1.77278e-88
1	9663206	9663805	599	63	426	1.49423e-83	0.247589	3.42718e-81	1	10406751	10407350	599	154	551	3.98308e-79	0.379651	5.92922e-77
1	9667675	9668274	599	16	265	6.87728e-74	0.133965	8.20253e-72	1	10423952	10424551	599	19	260	1.27677e-78	0.140104	1.84736e-76
1	9671284	9671883	599	70	507	6.03683e-103	0.226269	3.55002e-100	1	10428340	10428939	599	152	648	3.88425e-109	0.316858	2.32387e-106
1	9683223	9683822	599	63	521	5.19593e-113	0.200567	3.99394e-110	1	10440471	10441070	599	76	451	1.78969e-96	0.247576	6.53285e-94
1	9713730	9714329	599	29	307	1.57496e-74	0.181939	1.96521e-72	1	10445328	10445927	599	94	456	1.65321e-85	0.295639	3.52522e-83
1	9738210	9738809	599	38	313	1.94451e-68	0.222543	1.56647e-66	1	10446681	10447280	599	55	345	1.39978e-76	0.247405	1.79136e-74
1	9739876	9740475	599	17	264	1.99688e-72	0.140728	2.14168e-70	1	10455971	10456570	599	12	215	1.5059e-69	0.122425	1.2641e-67
1	9741205	9741804	599	10	240	1.77045e-72	0.106597	1.90779e-70	1	10459210	10459809	599	80	452	7.19812e-94	0.258465	2.32883e-91
1	9741819	9742418	599	62	459	1.89192e-94	0.225804	7.89343e-92	1	10471981	10472580	599	30	399	6.79736e-119	0.12775	5.34082e-116
1	9744678	9745277	599	60	367	5.13483e-68	0.277542	4.01297e-66	1	10474670	10475269	599	66	389	4.05455e-83	0.255426	7.58486e-81
1	9748230	9748829	599	42	318	1.02233e-66	0.237975	7.26774e-65	1	10478707	10479306	599	36	367	8.13604e-101	0.161986	3.57998e-98
1	9773817	9774416	599	50	422	9.81539e-93	0.204833	3.75892e-90	1	10488180	10488779	599	64	346	2.71736e-70	0.281284	2.3852e-68
1	9798752	9799351	599	80	403	4.54659e-65	0.323729	2.86534e-63	1	10494313	10494912	599	86	468	7.33651e-95	0.265752	2.48569e-92
1	9829338	9829937	599	97	408	2.00163e-56	0.379444	6.7798e-55	1	10501988	10502587	599	45	316	1.52017e-74	0.228663	1.72636e-72
1	9830439	9831038	599	11	289	2.36301e-88	0.093397	7.17243e-86	1	10506620	10507219	599	3	258	9.45143e-100	0.0445894	3.97809e-97
1	9831732	9832331	599	122	441	5.80625e-52	0.430126	1.44005e-50	1	10516194	10516793	599	46	348	6.91991e-85	0.210414	1.42724e-82
1	9834610	9835209	599	123	603	2.03345e-94	0.312559	8.47354e-92	1	10544304	10544903	599	110	740	1.73669e-168	0.205642	2.5925e-165
1	9852581	9853180	599	30	273	1.32866e-62	0.211766	7.00745e-61	1	10583857	10584456	599	34	292	1.62173e-75	0.196697	1.95059e-73
1	9857403	9858002	599	98	507	4.39114e-83	0.305036	9.76751e-81	1	10585158	10585757	599	248	677	2.05191e-69	0.476732	1.70693e-67
1	9874567	9875166	599	121	511	1.72896e-70	0.365949	1.61493e-68	1	10589029	10589628	599	228	593	9.83874e-57	0.505783	3.72021e-55
1	9875285	9875884	599	26	318	4.32855e-81	0.160574	8.478e-79	1	10603033	10603632	599	89	439	2.23744e-83	0.292979	4.24675e-81
1	9881809	9882408	599	19	220	1.44793e-55	0.1859	4.61702e-54	1	10613877	10614476	599	54	346	1.07799e-77	0.242785	1.47579e-75
1	9887385	9887984	599	91	426	9.75481e-65	0.342499	6.00294e-63	1	10617094	10617693	599	31	218	5.76106e-52	0.248864	1.61941e-50
1	9910377	9910976	599	31	305	5.13913e-72	0.193391	5.35354e-70	1	10620179	10620778	599	15	248	1.28691e-78	0.123423	1.8619e-76
1	9920028	9920627	599	20	302	5.04535e-82	0.138064	1.04948e-79	1	10640376	10640975	599	106	443	6.08501e-74	0.339453	6.66782e-72
1	9943198	9943797	599	70	392	1.96785e-68	0.296254	1.58375e-66	1	10649334	10649933	599	16	261	2.07762e-82	0.122599	3.73872e-80
1	9974532	9975131	599	46	327	2.45401e-66	0.249524	1.69615e-64	1	10662067	10662666	599	55	305	3.60047e-63	0.28179	2.03271e-61
1	10000932	10001531	599	21	258	3.53562e-66	0.16942	2.41539e-64	1	10668453	10669052	599	92	446	1.24378e-83	0.296821	2.39577e-81
1	10024676	10025275	599	38	378	3.00053e-89	0.182395	9.55987e-87	1	10696469	10697068	599	23	316	2.52174e-95	0.132104	8.72107e-93
1	10044094	10044693	599	34	343	1.39544e-81	0.184265	2.82431e-79	1	10718712	10719311	599	67	504	7.5437e-122	0.197298	6.35853e-119
1	10055381	10055980	599	53	337	4.18412e-64	0.272794	2.45947e-62	1	10791306	10791905	599	129	549	1.29765e-92	0.324093	3.95318e-90
1	10086350	10086949	599	131	584	2.05725e-84	0.342223	4.97567e-82	1	10831311	10831910	599	48	443	5.28656e-117	0.169293	3.96147e-114
1	10092122	10092721	599	48	344	5.28543e-70	0.245247	4.76739e-68	1	10833340	10833939	599	115	422	1.3531e-62	0.384466	7.36465e-61
1	10096963	10097562	599	31	416	1.08978e-108	0.139457	7.57334e-106	1	10840717	10841316	599	22	289	2.94813e-86	0.140234	6.54068e-84
1	10098385	10098984	599	59	430	7.27016e-88	0.231592	2.14982e-85	1	10845343	10845942	599	53	252	2.45788e-47	0.33421	5.20204e-46
1	10101863	10102462	599	75	410	2.6726e-70	0.300299	2.46383e-68	1	10860081	10860680	599	205	596	5.62501e-67	0.455689	4.02389e-65
1	10106777	10107376	599	35	331	8.73333e-77	0.195947	1.27897e-74	1	10860747	10861346	599	73	366	1.31514e-70	0.297516	1.17675e-68
1	10108017	10108616	599	141	474	4.46383e-51	0.455067	1.04076e-49	1	10902644	10903243	599	56	332	1.956e-71	0.261669	1.84205e-69
1	10108965	10109564	599	84	352	9.53374e-49	0.389757	1.89417e-47	1	10904569	10905168	599	35	285	3.97334e-72	0.206702	3.90126e-70
1	10112488	10113087	599	36	285	2.68345e-61	0.234956	1.28632e-59	1	10922261	10922860	599	47	350	9.63914e-85	0.213003	1.9701e-82
1	10150114	10150713	599	49	447	1.4444e-101	0.189542	8.09784e-99	1	10933812	10934411	599	25	302	6.34779e-88	0.148015	1.53465e-85
1	10157006	10157605	599	35	418	2.94154e-105	0.153284	1.85612e-102	1	10957973	10958572	599	36	262	3.63163e-63	0.231336	2.04967e-61
1	10164163	10164762	599	55	394	6.47963e-80	0.238907	1.17484e-77	1	10970444	10971043	599	50	340	8.49608e-79	0.231508	1.24054e-76
1	10182484	10183083	599	44	330	7.71295e-69	0.238001	6.39823e-67	1	10980934	10981533	599	28	272	7.31441e-74	0.181051	7.97559e-72
1	10189783	10190382	599	17	255	2.27302e-69	0.146013	1.95778e-67	1	10986212	10986811	599	37	468	3.25895e-137	0.128396	3.57389e-134
1	10198270	10198869	599	33	346	1.7057e-83	0.178155	3.89893e-81	1	10992688	10993287	599	102	535	1.33064e-105	0.269193	7.05644e-103
1	10216346	10216945	599	55	384	7.56276e-77	0.24545	1.11239e-74	1	10994169	10994768	599	130	476	3.20058e-70	0.378825	2.79795e-68
1	10222973	10223572	599	52	312	2.2539e-57	0.291128	8.17198e-56	1	11014840	11015439	599	172	577	2.87108e-77	0.400604	3.8281e-75
1	10246522	10247121	599	14	269	1.34957e-77	0.119547	2.08934e-75	1	11024318	11024917	599	92	423	2.4135e-76	0.31376	3.04799e-74
1	10250970	10251569	599	30	260	1.8777e-58	0.223027	7.34689e-57	1	11025662	11026261	599	37	304	4.02934e-77	0.202142	5.33192e-75
1	10255483	10256082	599	48	300	1.17554e-56	0.283392	4.04632e-55	1	11039783	11040382	599	114	578	2.43656e-111	0.27456	1.55983e-108
1	10259757	10260356	599	80	440	1.21986e-75	0.295234	1.64723e-73	1	11089871	11090470	599	63	392	2.16709e-86	0.243293	4.84216e-84
1	10300140	10300739	599	121	465	1.66281e-58	0.403878	6.52614e-57	1	11092720	11093319	599	12	238	2.03279e-78	0.109838	2.90508e-76
1	10301080	10301679	599	33	403	2.75146e-102	0.151747	1.5825e-99	1	11130997	11131596	599	119	429	1.73738e-62	0.38978	9.40554e-61
1	10305654	10306253	599	60	484	7.12705e-104	0.207616	4.31717e-101	1	11147658	11148257	599	29	319	4.06482e-90	0.157326	1.09598e-87
1	10306681	10307280	599	47	374	3.99228e-80	0.220586	7.34012e-78	1	11168779	11169378	599	47	293	4.54372e-65	0.257003	2.88709e-63
1	10308333	10308932	599	88	432	3.16425e-68	0.327567	2.51267e-66	1	11180347	11180946	599	36	371	2.78698e-102	0.160149	1.30364e-99
1	10309015	10309614	599	54	394	1.06396e-80	0.235162	2.03316e-78	1	11185480	11186079	599	25	210	2.90748e-54	0.21786	9.42472e-53
1	10309863	10310462	599	101	572	8.0975e-100	0.27635	4.25429e-97	1	11196008	11196607	599	39	290	1.88391e-70	0.222012	1.67102e-68
1	10318710	10319309	599	31	372	5.30608e-94	0.156839	2.16266e-91	1	11211390	11211989	599	22	246	3.19809e-70	0.1664	2.79603e-68
1	10320671	10321270	599	57	366	6.9281e-70	0.266247	6.19579e-68	1	11239523	11240122	599	60	472	1.41066e-116	0.19193	1.04569e-113
1	10327739	10328338	599	35	388	2.38316e-95	0.165754	1.03697e-92	1	11241474	11242073	599	70	409	7.46418e-87	0.25514	1.70866e-84
1	10328369	10328968	599	46	346	3.33757e-72	0.235091	3.52512e-70	1	11242279	11242878	599	24	268	2.49128e-76	0.16265	3.14056e-74
1	10347691	10348290	599	0	247	1.34655e-91	0.025983	4.85635e-89	1	11244768	11245367	599	80	469	1.55212e-99	0.248667	6.48031e-97
1	10353550	10354149	599	44	437	7.40225e-103	0.177136	4.34183e-100	1	11265255	11265854	599	56	291	7.0766e-58	0.300798	2.86827e-56
1	10368171	10368770	599	9	301	2.38273e-95	0.0781136	1.03697e-92	1	11273326	11273925	599	22	296	6.87754e-89	0.136725	1.74478e-86
1	10370885	10371484	599	30	322	1.728e-78	0.17781	2.84378e-76	1	11302324	11302923	599	31	408	3.46039e-121	0.128165	2.8781e-118
1	10378744	10379343	599	60	479	2.64598e-102	0.209883	1.52321e-99	1	11309114	11309713	599	100	444	6.84115e-78	0.321355	9.46776e-76
1	10386808	10387407	599	27	429	1.99036e-117	0.120762	1.67023e-114	1	11315880	11316479	599	113	576	2.26298e-111	0.273365	1.45053e-108
1	10388948	10389547	599	54	453	3.82559e-99	0.203143	1.95924e-96	1	11318033	11318632	599	15	234	2.83497e-73	0.131304	2.98455e-71
1	10424330	10424929	599	76	477	2.6207e-89	0.259271	8.37499e-87	1	11372047	11372646	599	63	420	5.99981e-96	0.226293	2.13643e-93
1	10428200	10428799	599	32	403	2.65111e-103	0.147969	1.57881e-100	1	11415668	11416267	599	135	519	4.32473e-80	0.358207	6.80938e-78
1	10440452	10441051	599	57	442	3.42444e-93	0.21839	1.34209e-90	1	11416375	11416974	599	91	398	3.6272e-69	0.331228	2.97344e-67
1	10450051	10450650	599	15	260	2.53674e-73	0.130344	2.90448e-71	1	11418295	11418894	599	55	362	2.21535e-82	0.23518	3.98061e-80
1	10455969	10456568	599	9	252	5.16034e-78	0.0943183	8.21753e-76	1	11433870	11434469	599	59	378	1.02193e-84	0.238771	2.08604e-82
1	10459188	10459787	599	51	372	2.82123e-76	0.237846	3.98736e-74	1	11435372	11435971	599	80	410	4.35034e-80	0.286291	6.84779e-78
1	10471980	10472579	599	23	394	5.07756e-110	0.116276	3.64978e-107	1	11436646	11437245	599	96	584	3.30566e-126	0.232679	3.04382e-123
1	10475694	10476293	599	96	454	1.82823e-69	0.336102	1.58549e-67	1	11450288	11450887	599	140	542	4.15351e-84	0.353925	8.20166e-82
1	10478780	10479379	599	31	351	4.68984e-87	0.166735	1.32395e-84	1	11461519	11462118	599	61	506	9.11732e-128	0.181049	8.63524e-125
1	10491758	10492357	599	22	274	1.712e-70	0.164785	1.59974e-68	1	11475418	11476017	599	47	318	1.28217e-73	0.235681	1.37841e-71
1	10494299	10494898	599	45	441	3.10342e-103	0.17882	1.84339e-100	1	11492596	11493195	599	23	352	5.85758e-109	0.117889	3.4839e-106
1	10502002	10502601	599	32	366	5.03324e-91	0.163735	1.76046e-88	1	11500115	11500714	599	79	344	8.29037e-60	0.340531	3.79398e-58
1	10506260	10506859	599	9	322	8.19938e-103	0.0727381	4.80279e-100	1	11520090	11520689	599	69	398	6.47528e-84	0.259256	1.26672e-81
1	10511710	10512309	599	79	418	5.70957e-70	0.308096	5.13727e-68	1	11534292	11534891	599	56	373	2.30336e-85	0.231454	4.8685e-83
1	10516183	10516782	599	59	378	5.02645e-72	0.265158	5.24259e-70	1	11555740	11556339	599	98	438	2.88688e-77	0.320111	3.84723e-75
1	10530053	10530652	599	3	224	4.51015e-77	0.0575623	6.73455e-75	1	11570073	11570672	599	76	379	8.83385e-73	0.297154	9.02918e-71
1	10544265	10544864	599	94	607	3.82978e-115	0.243572	3.08748e-112	1	11581325	11581924	599	98	346	1.12127e-49	0.410131	2.74088e-48
1	10585240	10585839	599	175	600	9.10583e-66	0.434006	6.03968e-64	1	11584762	11585361	599	136	432	8.59858e-55	0.436938	2.87499e-53
1	10602416	10603015	599	52	374	4.16294e-76	0.240477	5.80559e-74	1	11592641	11593240	599	32	337	9.50865e-94	0.160842	3.05686e-91
1	10613897	10614496	599	49	429	8.12654e-96	0.197885	3.61821e-93	1	11595091	11595690	599	67	394	4.72446e-84	0.255357	9.30291e-82
1	10617128	10617727	599	20	245	7.3257e-63	0.172383	3.93113e-61	1	11599454	11600053	599	24	341	1.18358e-103	0.126054	5.83971e-101
1	10619810	10620409	599	19	281	5.34424e-76	0.143273	7.39768e-74	1	11606828	11607427	599	83	432	3.54865e-85	0.280012	7.43466e-83
1	10622657	10623256	599	17	190	1.28923e-47	0.199953	2.37231e-46	1	11623554	11624153	599	18	271	6.65206e-84	0.128674	1.29993e-81
1	10640459	10641058	599	79	425	5.61152e-72	0.302775	5.83441e-70	1	11641187	11641786	599	175	574	5.94841e-75	0.409268	6.91532e-73
1	10649327	10649926	599	22	278	7.93844e-72	0.162271	8.16313e-70	1	11653089	11653688	599	103	527	2.57223e-102	0.275868	1.2051e-99
1	10662074	10662673	599	41	290	7.37984e-59	0.25709	2.97106e-57	1	11682209	11682808	599	90	408	6.68046e-73	0.31954	6.86997e-71
1	10668453	10669052	599	81	469	2.08753e-83	0.279204	4.7421e-81	1	11685005	11685604	599	18	266	5.25735e-82	0.131243	9.24696e-80
1	10696479	10697078	599	12	351	7.66073e-109	0.0808165	5.34237e-106	1	11687640	11688239	599	91	428	1.4634e-78	0.306905	2.10915e-76
1	10718691	10719290	599	49	499	2.31292e-118	0.16893	1.9691e-115	1	11704240	11704839	599	34	288	4.37894e-74	0.199592	4.83398e-72
1	10721538	10722137	599	21	246	3.39704e-62	0.178226	1.73584e-60	1	11747627	11748226	599	119	554	2.22278e-100	0.298344	9.60501e-98
1	10756463	10757062	599	113	473	7.86795e-65	0.372892	4.8684e-63	1	11763060	11763659	599	41	266	1.62071e-60	0.25372	7.75479e-59
1	10757385	10757984	599	22	343	9.67144e-94	0.129942	3.89506e-91	1	11781020	11781619	599	44	350	2.59976e-87	0.201421	6.09062e-85
1	10784575	10785174	599	86	381	2.20367e-55	0.366177	6.94073e-54	1	11794642	11795241	599	102	472	2.1278e-85	0.306838	4.51044e-83
1	10786622	10787221	599	32	315	2.4396e-74	0.191813	3.00518e-72	1	11833586	11834185	599	15	263	2.30201e-84	0.115951	4.61188e-82
1	10791312	10791911	599	84	500	1.93607e-90	0.269697	6.57792e-88	1	11835382	11835981	599	23	373	5.82203e-117	0.110911	4.35916e-114
1	10792644	10793243	599	8	176	1.13738e-52	0.128268	2.96256e-51	1	11840585	11841184	599	44	291	1.01307e-66	0.244798	7.13444e-65
1	10793717	10794316	599	51	297	1.19453e-53	0.301643	3.32856e-52	1	11869059	11869658	599	31	331	1.5523e-92	0.159726	4.70932e-90
1	10802384	10802983	599	5	189	2.65373e-61	0.0895773	1.27343e-59	1	11902599	11903198	599	97	389	7.4762e-63	0.359236	4.13936e-61
1	10808852	10809451	599	20	276	3.08848e-73	0.151881	3.51365e-71	1	11923893	11924492	599	40	280	3.88426e-66	0.235355	2.63937e-64
1	10816086	10816685	599	92	455	3.44672e-72	0.322797	3.63845e-70	1	11933755	11934354	599	46	368	6.04706e-92	0.198387	1.78361e-89
1	10831257	10831856	599	64	458	1.44882e-92	0.232666	5.49882e-90	1	11940920	11941519	599	73	416	5.4602e-87	0.260055	1.25907e-84
1	10833338	10833937	599	105	398	1.33535e-49	0.418211	2.81164e-48	1	11948274	11948873	599	55	344	3.05868e-76	0.248163	3.83745e-74
1	10840809	10841408	599	21	272	7.54184e-71	0.160173	7.22642e-69	1	11952928	11953527	599	97	435	5.92095e-77	0.319473	7.74658e-75
1	10869698	10870297	599	97	442	1.4192e-65	0.348892	9.28346e-64	1	11956985	11957584	599	125	574	7.51851e-103	0.300652	3.59621e-100
1	10904570	10905169	599	32	347	8.99072e-85	0.173193	2.22439e-82	1	11960407	11961006	599	62	394	7.70073e-88	0.238648	1.8517e-85
1	10922266	10922865	599	32	305	4.1676e-71	0.198469	4.06821e-69	1	11967541	11968140	599	129	580	3.29388e-102	0.306061	1.53558e-99
1	10953187	10953786	599	33	302	3.00735e-69	0.205675	2.57175e-67	1	12016090	12016689	599	61	347	9.05986e-73	0.268952	9.25035e-71
1	10986236	10986835	599	36	442	3.18704e-112	0.147978	2.41006e-109	1	12024422	12025021	599	64	467	2.03186e-111	0.205289	1.30428e-108
1	10996418	10997017	599	8	227	1.48517e-70	0.0976452	1.39435e-68	1	12025369	12025968	599	50	326	5.48731e-74	0.242012	6.03017e-72
1	11014259	11014858	599	73	418	5.6739e-74	0.287344	6.80761e-72	1	12032748	12033347	599	72	376	1.5779e-74	0.285707	1.79028e-72
1	11025666	11026265	599	32	314	5.14298e-74	0.192459	6.1862e-72	1	12037819	12038418	599	19	279	8.37719e-86	0.129997	1.81451e-83
1	11029834	11030433	599	20	270	3.21458e-71	0.155465	3.16477e-69	1	12045779	12046378	599	30	332	6.5783e-94	0.155028	2.13317e-91
1	11039780	11040379	599	91	524	1.23499e-92	0.275794	4.69916e-90	1	12047874	12048473	599	259	636	2.88063e-55	0.529812	9.93848e-54
1	11054445	11055044	599	42	356	1.20228e-78	0.211258	1.99898e-76	1	12067788	12068387	599	75	414	6.94047e-85	0.267674	1.43127e-82
1	11083427	11084026	599	13	241	3.98328e-69	0.127389	3.37352e-67	1	12071533	12072132	599	53	317	1.23538e-68	0.262039	9.80479e-67
1	11089842	11090441	599	60	497	5.74054e-108	0.201943	3.91438e-105	1	12088638	12089237	599	72	449	8.02095e-99	0.237158	3.24954e-96
1	11091312	11091911	599	83	413	5.2754e-66	0.325978	3.56002e-64	1	12104053	12104652	599	65	282	3.42147e-49	0.353934	8.11299e-48
1	11092718	11093317	599	11	252	2.15884e-75	0.108018	2.86403e-73	1	12109350	12109949	599	63	356	2.61368e-74	0.269243	2.92646e-72
1	11136061	11136660	599	29	322	1.89274e-79	0.172993	3.32569e-77	1	12126593	12127192	599	46	312	2.36995e-72	0.236121	2.35956e-70
1	11147549	11148148	599	24	278	8.05077e-70	0.173737	7.16343e-68	1	12132142	12132741	599	52	350	1.21746e-80	0.232209	1.97976e-78
1	11168784	11169383	599	33	315	1.98108e-73	0.19671	2.2828e-71	1	12133580	12134179	599	61	351	4.22097e-74	0.265723	4.66591e-72
1	11171523	11172122	599	53	334	3.31405e-63	0.27538	1.82443e-61	1	12139677	12140276	599	39	344	1.24231e-89	0.185355	3.27028e-87
1	11178460	11179059	599	91	526	3.20625e-93	0.274699	1.25791e-90	1	12142841	12143440	599	31	299	7.96154e-81	0.177846	1.30943e-78
1	11180365	11180964	599	28	301	1.62605e-73	0.180592	1.88838e-71	1	12146947	12147546	599	117	479	2.13054e-78	0.341987	3.04182e-76
1	11185480	11186079	599	26	250	8.90108e-59	0.207232	3.56621e-57	1	12166780	12167379	599	29	332	6.29653e-95	0.150828	2.13851e-92
1	11196013	11196612	599	32	306	1.98281e-71	0.197783	1.98025e-69	1	12203540	12204139	599	100	461	3.28485e-83	0.308956	6.18091e-81
1	11211392	11211991	599	28	248	2.32277e-56	0.2218	7.83408e-55	1	12205803	12206402	599	115	568	1.89862e-107	0.281816	1.07365e-104
1	11213204	11213803	599	41	379	7.43353e-87	0.193821	2.07647e-84	1	12208352	12208951	599	41	344	7.98885e-88	0.193281	1.91874e-85
1	11214597	11215196	599	86	442	2.67341e-72	0.313323	2.84628e-70	1	12220600	12221199	599	32	285	7.99394e-75	0.192025	9.2291e-73
1	11239469	11240068	599	45	463	2.22163e-110	0.169932	1.60995e-107	1	12229667	12230266	599	43	258	2.84952e-56	0.272802	1.04621e-54
1	11243604	11244203	599	99	461	1.34345e-69	0.340017	1.17739e-67	1	12248936	12249535	599	173	644	6.54544e-96	0.359249	2.32766e-93
1	11244726	11245325	599	41	354	7.21213e-79	0.208255	1.21851e-76	1	12252724	12253323	599	135	511	9.91322e-78	0.364065	1.36001e-75
1	11273353	11273952	599	27	332	9.76624e-85	0.158133	2.40919e-82	1	12262647	12263246	599	35	291	2.90524e-74	0.202189	3.24417e-72
1	11285571	11286170	599	30	308	6.47728e-74	0.186363	7.74075e-72	1	12265821	12266420	599	24	308	3.15045e-91	0.140358	8.96973e-89
1	11300052	11300651	599	6	212	4.88291e-68	0.0879622	3.82248e-66	1	12287475	12288074	599	29	269	7.91245e-72	0.188456	7.62952e-70
1	11302317	11302916	599	21	361	5.07803e-101	0.118751	2.79178e-98	1	12293014	12293613	599	48	415	6.38935e-107	0.181289	3.55263e-104
1	11315770	11316369	599	69	522	2.21113e-108	0.216731	1.52427e-105	1	12299479	12300078	599	29	282	1.5099e-76	0.179252	1.93007e-74
1	11341774	11342373	599	29	268	6.95224e-62	0.210111	3.47798e-60	1	12316241	12316840	599	52	331	3.90997e-74	0.246288	4.33077e-72
1	11372047	11372646	599	56	436	3.90636e-92	0.21818	1.45054e-89	1	12384592	12385191	599	50	434	6.43607e-112	0.179106	4.19159e-109
1	11414202	11414801	599	42	381	1.30599e-86	0.196694	3.59418e-84	1	12393093	12393692	599	113	455	1.77316e-73	0.3497	1.8882e-71
1	11418327	11418926	599	51	359	2.80717e-72	0.246921	2.98176e-70	1	12411268	12411867	599	69	489	6.10029e-115	0.208941	4.32663e-112
1	11433867	11434466	599	56	374	4.83077e-73	0.256309	5.41706e-71	1	12412661	12413260	599	51	388	1.07785e-94	0.204899	3.62189e-92
1	11435372	11435971	599	66	431	8.05511e-83	0.254711	1.76501e-80	1	12432907	12433506	599	95	565	1.45105e-120	0.238587	1.18345e-117
1	11436658	11437257	599	80	540	2.45704e-105	0.238332	1.55412e-102	1	12448729	12449328	599	96	419	1.33461e-72	0.329205	1.3486e-70
1	11450060	11450659	599	32	410	1.22095e-105	0.145318	7.79188e-103	1	12462598	12463197	599	101	495	2.35621e-93	0.289372	7.43955e-91
1	11461519	11462118	599	42	458	1.36306e-111	0.162151	1.01598e-108	1	12467313	12467912	599	132	492	8.41079e-74	0.371081	9.13397e-72
1	11475418	11476017	599	31	321	3.23564e-77	0.183217	4.88743e-75	1	12491972	12492571	599	92	494	3.60209e-99	0.266714	1.4806e-96
1	11492597	11493196	599	33	336	3.106e-80	0.183751	5.7562e-78	1	12523999	12524598	599	62	426	8.1085e-99	0.219867	3.28286e-96
1	11500115	11500714	599	53	318	1.91346e-58	0.29003	7.48343e-57	1	12541799	12542398	599	231	656	3.25972e-71	0.460954	3.02761e-69
1	11534405	11535004	599	46	364	8.1372e-78	0.22286	1.27876e-75	1	12545912	12546511	599	91	452	3.23315e-86	0.289851	7.15744e-84
1	11544821	11545420	599	6	216	1.84297e-69	0.0862214	1.59819e-67	1	12546680	12547279	599	33	297	3.16507e-78	0.18851	4.47194e-76
1	11584751	11585350	599	84	409	2.89314e-64	0.332847	1.72059e-62	1	12552331	12552930	599	24	338	1.6109e-102	0.127234	7.60418e-100
1	11592646	11593245	599	28	301	1.62605e-73	0.180592	1.88838e-71	1	12561017	12561616	599	29	287	2.27304e-78	0.175944	3.2382e-76
1	11599718	11600317	599	32	384	5.55336e-97	0.155671	2.60052e-94	1	12564236	12564835	599	76	368	2.96215e-69	0.306506	2.44184e-67
1	11606711	11607310	599	75	390	1.45239e-64	0.316494	8.8289e-63	1	12568074	12568673	599	61	360	4.13719e-77	0.258729	5.46956e-75
1	11609567	11610166	599	46	395	1.35685e-87	0.204504	3.95128e-85	1	12594745	12595344	599	42	342	3.17629e-86	0.198452	7.03577e-84
1	11612435	11613034	599	62	313	5.26399e-51	0.337761	1.22228e-49	1	12595621	12596220	599	32	274	7.11527e-71	0.20021	6.47221e-69
1	11653090	11653689	599	99	487	8.20523e-77	0.321051	1.20409e-74	1	12596281	12596880	599	67	389	2.22191e-82	0.258807	3.99101e-80
1	11678226	11678825	599	26	306	4.15512e-77	0.167238	6.22013e-75	1	12602439	12603038	599	68	354	4.01772e-70	0.289531	3.49142e-68
1	11684991	11685590	599	18	320	1.95747e-90	0.119835	6.64714e-88	1	12607904	12608503	599	64	396	5.55797e-87	0.244038	1.28097e-84
1	11703241	11703840	599	22	276	3.68865e-71	0.163519	3.61241e-69	1	12629813	12630412	599	198	620	1.65382e-76	0.423459	2.10974e-74
1	11704413	11705012	599	50	314	2.14085e-59	0.279618	8.96533e-58	1	12640645	12641244	599	27	280	9.36337e-78	0.170514	1.28583e-75
1	11728047	11728646	599	21	248	7.39205e-63	0.176696	3.96505e-61	1	12642353	12642952	599	28	271	1.69099e-73	0.18176	1.80224e-71
1	11729690	11730289	599	5	191	5.13775e-62	0.0885704	2.59474e-60	1	12651657	12652256	599	79	391	1.24154e-74	0.297586	1.41628e-72
1	11733977	11734576	599	39	364	8.06795e-84	0.193941	1.88086e-81	1	12660115	12660714	599	27	318	8.56601e-92	0.149025	2.50787e-89
1	11739000	11739599	599	38	403	2.15301e-97	0.170523	1.02641e-94	1	12687353	12687952	599	84	380	6.57284e-68	0.323802	4.97909e-66
1	11747788	11748387	599	141	578	3.12853e-77	0.369955	4.72878e-75	1	12689824	12690423	599	45	298	2.47943e-68	0.243295	1.93044e-66
1	11763114	11763713	599	35	306	8.91157e-69	0.2129	7.36119e-67	1	12710476	12711075	599	18	268	9.16147e-83	0.130204	1.68115e-80
1	11773362	11773961	599	124	480	8.4577e-61	0.399472	3.91362e-59	1	12721177	12721776	599	42	366	8.50134e-95	0.184766	2.87118e-92
1	11781180	11781779	599	64	368	1.62965e-65	0.292731	1.06086e-63	1	12728215	12728814	599	29	278	4.3053e-75	0.181988	5.04505e-73
1	11794582	11795181	599	74	412	1.51255e-71	0.295254	1.52501e-69	1	12730992	12731591	599	39	288	9.45045e-70	0.223646	8.02317e-68
1	11798499	11799098	599	8	291	3.05583e-93	0.0749839	1.19938e-90	1	12731607	12732206	599	42	364	4.43587e-94	0.185835	1.44821e-91
1	11802247	11802846	599	29	284	4.81443e-67	0.197575	3.50296e-65	1	12747098	12747697	599	134	563	6.65485e-94	0.326831	2.15737e-91
1	11809392	11809991	599	8	204	1.83813e-62	0.109461	9.59021e-61	1	12917459	12918058	599	14	232	1.11951e-73	0.126008	1.20778e-71
1	11825293	11825892	599	22	272	7.93659e-70	0.166072	7.06655e-68	1	12943613	12944212	599	69	379	1.29683e-77	0.272934	1.76626e-75
1	11833586	11834185	599	10	246	1.40408e-74	0.10383	1.76068e-72	1	12946355	12946954	599	40	407	1.5027e-111	0.158621	9.68223e-109
1	11835258	11835857	599	74	486	1.76436e-93	0.248342	7.01442e-91	1	12949993	12950592	599	50	405	1.44318e-101	0.192583	6.5492e-99
1	11837128	11837727	599	26	243	1.60615e-56	0.213592	5.47458e-55	1	12951100	12951699	599	259	722	3.56457e-76	0.464436	4.45712e-74
1	11861646	11862245	599	66	345	1.54971e-57	0.321855	5.67705e-56	1	12952959	12953558	599	39	352	1.63619e-92	0.180918	4.9576e-90
1	11869263	11869862	599	22	304	1.5305e-80	0.147609	2.89537e-78	1	12976950	12977549	599	24	258	1.22283e-72	0.169356	1.23933e-70
1	11902540	11903139	599	64	388	2.08641e-71	0.276882	2.08157e-69	1	12979951	12980550	599	31	280	6.07102e-74	0.190656	6.65319e-72
1	11913521	11914120	599	66	442	3.79485e-86	0.248071	1.01807e-83	1	12996053	12996652	599	119	361	1.37334e-43	0.467273	2.31404e-42
1	11933755	11934354	599	45	391	3.48834e-87	0.202888	9.92565e-85	1	13034932	13035531	599	128	548	6.56238e-93	0.322417	2.02837e-90
1	11940915	11941514	599	66	419	3.26748e-79	0.262366	5.65006e-77	1	13047662	13048261	599	56	336	8.85722e-73	0.258383	9.05142e-71
1	11952753	11953352	599	58	396	3.23848e-78	0.248793	5.22905e-76	1	13120264	13120863	599	23	257	2.82136e-73	0.164454	2.97101e-71
1	11956997	11957596	599	141	526	7.42708e-64	0.408167	4.28229e-62	1	13151002	13151601	599	38	232	2.88227e-51	0.275404	7.76643e-50
1	11958741	11959340	599	39	343	4.26565e-77	0.206471	6.37894e-75	1	13152296	13152895	599	58	291	1.6189e-56	0.31006	6.03688e-55
1	11960399	11960998	599	53	380	3.5905e-77	0.240383	5.40005e-75	1	13172577	13173176	599	39	256	1.15712e-58	0.253427	4.93279e-57
1	12024426	12025025	599	42	416	6.87324e-98	0.179349	3.34603e-95	1	13175221	13175820	599	88	431	1.77669e-81	0.295688	3.03294e-79
1	12025369	12025968	599	53	358	1.91178e-70	0.255954	1.77708e-68	1	13177936	13178535	599	55	332	3.49357e-72	0.257634	3.44183e-70
1	12032653	12033252	599	90	455	1.92926e-73	0.316522	2.22545e-71	1	13218800	13219399	599	62	288	6.1368e-53	0.332159	1.83374e-51
1	12034816	12035415	599	9	208	1.42622e-62	0.11575	7.50042e-61	1	13225102	13225701	599	163	436	4.99303e-44	0.510908	8.63915e-43
1	12036603	12037202	599	38	343	5.70292e-78	0.202046	9.05846e-76	1	13237287	13237886	599	55	321	1.72075e-68	0.266965	1.35214e-66
1	12037780	12038379	599	26	292	1.7485e-72	0.175737	1.88436e-70	1	13285719	13286318	599	24	238	2.63884e-65	0.184543	1.702e-63
1	12045785	12046384	599	18	379	8.0118e-111	0.100259	5.86458e-108	1	13292361	13292960	599	19	247	9.90792e-74	0.14796	1.07173e-71
1	12047773	12048372	599	163	572	1.40602e-64	0.427228	8.5539e-63	1	13334139	13334738	599	83	422	6.22337e-82	0.286974	1.08887e-79
1	12054866	12055465	599	24	263	7.06262e-65	0.184274	4.39198e-63	1	13359685	13360284	599	57	354	4.22633e-78	0.248318	5.92564e-76
1	12066152	12066751	599	78	444	3.76039e-78	0.285967	6.0511e-76	1	13405641	13406240	599	85	452	2.57916e-90	0.272755	7.01566e-88
1	12067790	12068389	599	70	412	2.77494e-74	0.28117	3.40412e-72	1	13417974	13418573	599	78	327	3.46867e-55	0.355209	1.19041e-53
1	12070149	12070748	599	29	291	2.58527e-69	0.192543	2.21985e-67	1	13433074	13433673	599	26	328	1.41085e-96	0.139943	5.16952e-94
1	12071504	12072103	599	28	323	9.36644e-81	0.167614	1.79648e-78	1	13454354	13454953	599	57	352	2.01059e-77	0.249805	2.70685e-75
1	12078643	12079242	599	32	296	3.28522e-68	0.204861	2.60483e-66	1	13472544	13473143	599	49	391	1.77617e-97	0.196414	6.77904e-95
1	12086504	12087103	599	47	339	3.01927e-69	0.244641	2.5805e-67	1	13485454	13486053	599	69	433	1.07093e-95	0.237311	3.77135e-93
1	12087194	12087793	599	56	388	2.65387e-77	0.246593	4.02737e-75	1	13499891	13500490	599	98	438	2.88688e-77	0.320111	3.84723e-75
1	12088561	12089160	599	73	460	2.12564e-86	0.259912	5.77785e-84	1	13559637	13560236	599	118	479	8.16031e-78	0.344635	1.12423e-75
1	12126579	12127178	599	37	298	1.49993e-64	0.229266	9.10838e-63	1	13615609	13616208	599	63	369	1.21297e-78	0.259266	1.75659e-76
1	12129128	12129727	599	91	465	1.23342e-75	0.312468	1.66418e-73	1	13623008	13623607	599	146	487	4.31708e-65	0.411261	2.74649e-63
1	12132240	12132839	599	33	355	1.93845e-86	0.173399	5.28057e-84	1	13626416	13627015	599	280	712	2.41928e-65	0.506981	1.56408e-63
1	12133581	12134180	599	47	368	3.018e-78	0.224372	4.88592e-76	1	13642948	13643547	599	54	318	3.16742e-68	0.265399	2.44785e-66
1	12146947	12147546	599	69	480	1.94892e-95	0.236582	8.52171e-93	1	13645408	13646007	599	109	480	1.64806e-83	0.32007	3.14817e-81
1	12149290	12149889	599	107	482	1.23556e-70	0.348035	1.16687e-68	1	13647854	13648453	599	55	358	5.1902e-81	0.237948	8.61883e-79
1	12159556	12160155	599	13	217	6.93098e-61	0.142477	3.2299e-59	1	13652262	13652861	599	186	660	1.32829e-93	0.374466	4.24649e-91
1	12161181	12161780	599	49	341	2.61352e-68	0.251912	2.08706e-66	1	13657455	13658054	599	34	363	2.53892e-101	0.15631	1.14086e-98
1	12200296	12200895	599	36	302	1.19135e-66	0.220973	8.42654e-65	1	13676781	13677380	599	210	653	8.51104e-80	0.423785	1.3172e-77
1	12203540	12204139	599	74	448	4.15262e-82	0.270428	8.68756e-80	1	13709263	13709862	599	111	488	9.29584e-85	0.319794	1.90299e-82
1	12205800	12206399	599	109	533	1.69595e-83	0.318606	3.87817e-81	1	13724573	13725172	599	31	336	2.23534e-94	0.157219	7.40414e-92
1	12208304	12208903	599	47	361	4.61834e-76	0.228955	6.42013e-74	1	13735054	13735653	599	59	414	4.21746e-97	0.217008	1.583e-94
1	12214964	12215563	599	33	268	1.91909e-58	0.233433	7.50313e-57	1	13764707	13765306	599	159	416	1.03305e-40	0.524564	1.46134e-39
1	12229671	12230270	599	31	286	6.90117e-66	0.20702	4.61663e-64	1	13776957	13777556	599	95	428	5.09874e-76	0.318943	6.30969e-74
1	12230995	12231594	599	20	292	1.2321e-78	0.143074	2.04619e-76	1	13806052	13806651	599	127	534	3.2137e-89	0.328883	8.28856e-87
1	12236691	12237290	599	28	253	5.86059e-58	0.217139	2.21396e-56	1	13806989	13807588	599	61	270	6.28109e-48	0.350697	1.3778e-46
1	12248934	12249533	599	105	554	5.78909e-92	0.295875	2.12863e-89	1	13815883	13816482	599	34	300	2.18287e-78	0.191148	3.11493e-76
1	12262465	12263064	599	28	317	8.95126e-79	0.170967	1.50115e-76	1	13833579	13834178	599	150	604	6.08529e-97	0.336779	2.268e-94
1	12265818	12266417	599	38	345	1.30579e-78	0.200811	2.16558e-76	1	13840924	13841523	599	158	583	2.9861e-86	0.366497	6.62275e-84
1	12287475	12288074	599	27	287	6.98985e-70	0.184465	6.24916e-68	1	13858054	13858653	599	66	400	8.13811e-87	0.248051	1.85991e-84
1	12293011	12293610	599	34	357	3.82487e-86	0.176658	1.0259e-83	1	13874362	13874961	599	111	469	6.63783e-79	0.333356	9.75668e-77
1	12299460	12300059	599	16	295	3.48608e-84	0.119564	8.31542e-82	1	13903386	13903985	599	72	335	2.25008e-61	0.32266	1.13517e-59
1	12317617	12318216	599	6	224	2.60963e-72	0.0829354	2.77933e-70	1	13910201	13910800	599	91	346	1.95995e-53	0.383806	6.03815e-52
1	12384592	12385191	599	60	410	5.85179e-81	0.247032	1.13716e-78	1	13912345	13912944	599	68	382	2.5381e-79	0.267239	3.82314e-77
1	12385345	12385944	599	37	318	7.19921e-71	0.214045	6.91024e-69	1	13945423	13946022	599	148	559	1.10502e-84	0.360596	2.25183e-82
1	12411268	12411867	599	59	486	2.43559e-105	0.203732	1.541e-102	1	13946884	13947483	599	125	669	2.28837e-133	0.256375	2.36798e-130
1	12412764	12413363	599	54	398	6.18565e-82	0.23268	1.28104e-79	1	13967245	13967844	599	139	566	7.23377e-92	0.336083	2.12408e-89
1	12432830	12433429	599	63	509	3.12317e-109	0.205507	2.19994e-106	1	13971399	13971998	599	55	540	1.40838e-145	0.154669	1.73641e-142
1	12459048	12459647	599	30	310	1.44399e-74	0.185091	1.80736e-72	1	13999437	14000036	599	71	329	4.03264e-60	0.324854	1.88109e-58
1	12462604	12463203	599	52	437	8.81985e-96	0.204212	3.92077e-93	1	14005700	14006299	599	34	283	2.67072e-72	0.203331	2.65068e-70
1	12468838	12469437	599	27	297	3.67529e-73	0.177893	4.15426e-71	1	14006834	14007433	599	70	368	2.65008e-73	0.2851	2.79642e-71
1	12492048	12492647	599	110	500	8.7214e-74	0.343413	1.03047e-71	1	14019203	14019802	599	137	565	9.79729e-93	0.332274	3.00336e-90
1	12524059	12524658	599	31	366	5.17631e-92	0.159546	1.90741e-89	1	14020512	14021111	599	237	722	8.3163e-86	0.427406	1.80202e-83
1	12552340	12552939	599	21	377	1.63488e-106	0.113453	1.07061e-103	1	14044870	14045469	599	213	630	2.55611e-72	0.445724	2.53989e-70
1	12561013	12561612	599	21	280	1.57555e-73	0.155323	1.83107e-71	1	14049580	14050179	599	39	310	1.69412e-77	0.206882	2.28975e-75
1	12564203	12564802	599	56	386	1.08255e-76	0.247936	1.57437e-74	1	14053285	14053884	599	78	563	2.94253e-133	0.200927	3.0404e-130
1	12568074	12568673	599	50	450	1.20615e-101	0.191495	6.78171e-99	1	14054046	14054645	599	118	460	4.04059e-72	0.359544	3.96434e-70
1	12569254	12569853	599	43	358	1.97707e-78	0.214219	3.23515e-76	1	14055492	14056091	599	108	400	5.74397e-60	0.384251	2.65485e-58
1	12594747	12595346	599	33	297	1.20083e-67	0.209342	9.13252e-66	1	14060829	14061428	599	44	326	7.37479e-79	0.217093	1.08101e-76
1	12607050	12607649	599	114	500	1.77527e-71	0.354681	1.77808e-69	1	14065360	14065959	599	37	340	4.88577e-90	0.179604	1.31138e-87
1	12607902	12608501	599	55	382	3.09175e-76	0.246802	4.35718e-74	1	14066064	14066663	599	52	274	4.2665e-55	0.300814	1.45424e-53
1	12617385	12617984	599	16	258	1.68882e-71	0.137831	1.6955e-69	1	14074627	14075226	599	69	475	4.33435e-110	0.215386	2.67248e-107
1	12636664	12637263	599	38	322	2.77687e-71	0.215976	2.74732e-69	1	14082993	14083592	599	164	619	1.64732e-93	0.356354	5.23955e-91
1	12640649	12641248	599	11	268	5.50212e-81	0.101177	1.07192e-78	1	14092811	14093410	599	121	474	1.35688e-74	0.356465	1.54555e-72
1	12642427	12643026	599	14	233	3.20151e-65	0.139293	2.04096e-63	1	14093945	14094544	599	94	491	8.49807e-97	0.27363	3.14704e-94
1	12651661	12652260	599	55	366	2.28259e-71	0.258165	2.27051e-69	1	14110741	14111340	599	42	356	3.24651e-91	0.190235	9.23294e-89
1	12652389	12652988	599	111	498	1.16615e-72	0.347684	1.27302e-70	1	14112136	14112735	599	62	374	4.56624e-81	0.252084	7.61566e-79
1	12659760	12660359	599	30	308	6.47728e-74	0.186363	7.74075e-72	1	14113243	14113842	599	122	444	3.16425e-65	0.384582	2.03285e-63
1	12667923	12668522	599	18	321	8.87344e-91	0.11944	3.06846e-88	1	14122061	14122660	599	116	474	1.80843e-77	0.343083	2.44147e-75
1	12689315	12689914	599	13	267	4.07823e-78	0.114238	6.54108e-76	1	14124400	14124999	599	151	530	1.11014e-74	0.388279	1.27039e-72
1	12698499	12699098	599	24	286	1.80716e-72	0.168589	1.94494e-70	1	14169867	14170466	599	77	396	1.34934e-77	0.287056	1.83503e-75
1	12710480	12711079	599	12	257	7.06192e-76	0.112401	9.70091e-74	1	14174497	14175096	599	22	258	1.13554e-74	0.158179	1.29883e-72
1	12721186	12721785	599	50	340	3.05597e-67	0.257092	2.25605e-65	1	14176825	14177424	599	92	380	4.81044e-63	0.35115	2.69785e-61
1	12728196	12728795	599	20	239	7.2115e-61	0.176996	3.35366e-59	1	14188340	14188939	599	65	402	2.99493e-88	0.243486	7.35776e-86
1	12730990	12731589	599	31	293	3.86972e-68	0.201784	3.04779e-66	1	14200378	14200977	599	98	562	2.40185e-117	0.246695	1.81532e-114
1	12731603	12732202	599	33	372	5.02503e-92	0.165066	1.85417e-89	1	14213592	14214191	599	47	392	1.35006e-99	0.189057	5.64642e-97
1	12863133	12863732	599	62	273	5.95894e-40	0.390392	6.67682e-39	1	14225619	14226218	599	238	706	4.00125e-81	0.439184	6.69724e-79
1	12864860	12865459	599	47	392	8.61177e-86	0.209949	2.26292e-83	1	14227099	14227698	599	134	624	7.47824e-113	0.293636	5.00424e-110
1	12872072	12872671	599	18	260	5.61752e-70	0.149323	5.0564e-68	1	14227792	14228391	599	230	722	4.71532e-89	0.415603	1.20541e-86
1	12946359	12946958	599	39	411	4.62722e-99	0.170699	2.36197e-96	1	14261778	14262377	599	236	684	2.87222e-76	0.450289	3.61006e-74
1	12949985	12950584	599	36	405	5.66293e-100	0.162188	2.99278e-97	1	14306864	14307463	599	156	506	1.89672e-65	0.419902	1.23541e-63
1	12952959	12953558	599	28	407	7.3966e-109	0.131403	5.16131e-106	1	14310966	14311565	599	46	369	2.67315e-92	0.197822	8.02439e-90
1	12953575	12954174	599	46	372	2.51175e-80	0.217819	4.67761e-78	1	14327392	14327991	599	124	532	2.07584e-90	0.323073	5.67808e-88
1	12976997	12977596	599	11	239	7.33063e-71	0.114284	7.03122e-69	1	14331004	14331603	599	78	429	1.07422e-87	0.266954	2.56691e-85
1	12979534	12980133	599	76	424	1.10185e-73	0.293312	1.29424e-71	1	14433351	14433950	599	257	817	4.62995e-102	0.40565	2.14558e-99
1	12980135	12980734	599	23	257	7.19676e-64	0.182628	4.1564e-62	1	14441685	14442284	599	180	657	6.4764e-96	0.364999	2.30317e-93
1	12999480	13000079	599	154	569	3.41291e-68	0.407714	2.70371e-66	1	14453093	14453692	599	94	461	4.16328e-87	0.292283	9.65511e-85
1	13027643	13028242	599	66	432	4.02142e-83	0.254092	8.98059e-81	1	14480977	14481576	599	145	550	1.08848e-83	0.359933	2.10232e-81
1	13034934	13035533	599	83	522	1.08885e-97	0.255109	5.25991e-95	1	14484224	14484823	599	140	486	7.68942e-68	0.396616	5.8003e-66
1	13046443	13047042	599	57	408	1.17006e-82	0.237515	2.53507e-80	1	14489050	14489649	599	132	552	9.76758e-92	0.329078	2.85174e-89
1	13047678	13048277	599	41	304	3.57293e-63	0.244573	1.96143e-61	1	14498653	14499252	599	216	702	2.77169e-90	0.403555	7.52875e-88
1	13049633	13050232	599	15	237	1.84341e-65	0.143848	1.19524e-63	1	14506983	14507582	599	130	629	4.90934e-117	0.283273	3.68142e-114
1	13067870	13068469	599	75	351	1.23756e-53	0.353604	3.44602e-52	1	14590496	14591095	599	102	633	3.31151e-138	0.225933	3.68591e-135
1	13073733	13074332	599	47	358	3.96735e-75	0.230976	5.16234e-73	1	14600225	14600824	599	192	647	7.55302e-87	0.3937	1.7286e-84
1	13081251	13081850	599	3	230	3.02734e-79	0.055961	5.24238e-77	1	14610066	14610665	599	40	226	8.87216e-48	0.295609	1.92934e-46
1	13120266	13120865	599	18	313	4.95187e-88	0.122668	1.47627e-85	1	14677476	14678075	599	56	313	4.23058e-65	0.278474	2.69326e-63
1	13131516	13132115	599	25	272	7.1376e-67	0.183645	5.13035e-65	1	14690492	14691091	599	42	292	1.14249e-68	0.234528	9.0839e-67
1	13149733	13150332	599	133	473	1.44276e-54	0.432379	4.28492e-53	1	14719997	14720596	599	53	323	1.17582e-70	0.256899	1.05459e-68
1	13150973	13151572	599	15	288	5.83933e-83	0.116938	1.28987e-80	1	14721025	14721624	599	271	890	2.47186e-115	0.390232	1.77274e-112
1	13172579	13173178	599	47	281	1.01281e-51	0.298336	2.47178e-50	1	14721625	14722224	599	242	855	3.80237e-120	0.365825	3.07215e-117
1	13175205	13175804	599	74	423	9.4758e-75	0.287203	1.20062e-72	1	14914111	14914710	599	4	227	1.60006e-85	0.0588037	3.41532e-83
1	13177932	13178531	599	42	342	3.17426e-74	0.220382	3.87653e-72	1	14972232	14972831	599	32	284	1.83093e-74	0.192742	2.06731e-72
1	13233037	13233636	599	97	406	6.77637e-56	0.381407	2.21001e-54	1	15060185	15060784	599	156	588	8.38529e-89	0.359023	2.11577e-86
1	13234265	13234864	599	22	263	7.77651e-67	0.172113	5.5693e-65	1	15075020	15075619	599	97	473	5.81761e-89	0.292649	1.48173e-86
1	13263478	13264077	599	29	298	1.36536e-71	0.187757	1.38086e-69	1	15081975	15082574	599	4412	6513	5.22539e-118	0.760033	4.01461e-115
1	13267963	13268562	599	27	288	3.2898e-70	0.183786	3.01113e-68	1	15082584	15083183	599	12238	17288	2.12194e-239	0.777496	4.29268e-236
1	13268784	13269383	599	44	368	9.58393e-81	0.212172	1.83565e-78	1	15094315	15094914	599	190	595	1.66104e-73	0.425402	1.77165e-71
1	13275877	13276476	599	50	347	2.24165e-69	0.251627	1.93127e-67	1	15094960	15095559	599	273	644	4.02405e-52	0.549453	1.14377e-50
1	13278501	13279100	599	18	261	2.57934e-70	0.148715	2.38011e-68	1	15099553	15100152	599	288	679	8.51747e-55	0.546875	2.8491e-53
1	13284031	13284630	599	46	335	8.46277e-69	0.243239	7.00193e-67	1	15100366	15100965	599	307	875	7.96945e-95	0.446596	2.69556e-92
1	13292332	13292931	599	14	253	4.42088e-72	0.127596	4.62761e-70	1	15101754	15102353	599	522	1050	7.46011e-60	0.612543	3.42701e-58
1	13306575	13307174	599	132	490	2.76251e-59	0.413847	1.14739e-57	1	15105651	15106250	599	214	492	2.12563e-38	0.579291	2.62113e-37
1	13334152	13334751	599	54	378	8.80233e-76	0.245637	1.19818e-73	1	15136427	15137026	599	228	775	1.18941e-104	0.383046	6.09198e-102
1	13359645	13360244	599	40	368	3.25778e-84	0.195825	7.78511e-82	1	15142213	15142812	599	26	382	6.35129e-117	0.119184	4.75007e-114
1	13405648	13406247	599	43	372	7.23017e-83	0.205741	1.58882e-80	1	15179477	15180076	599	202	673	4.00734e-89	0.396144	1.02839e-86
1	13433446	13434045	599	46	396	6.53088e-88	0.203962	1.93658e-85	1	15191704	15192303	599	84	397	2.90587e-73	0.309245	3.0576e-71
1	13454336	13454935	599	38	357	1.83316e-82	0.193705	3.92507e-80	1	15205853	15206452	599	148	512	4.13287e-71	0.395199	3.81847e-69
1	13472551	13473150	599	38	342	1.19124e-77	0.202669	1.85179e-75	1	15214958	15215557	599	110	460	9.45272e-77	0.337416	1.22348e-74
1	13485459	13486058	599	67	394	4.50374e-71	0.283576	4.38653e-69	1	15422517	15423116	599	169	584	9.38537e-81	0.389234	1.53739e-78
1	13531238	13531837	599	10	241	7.90956e-73	0.106126	8.73617e-71	1	15426114	15426713	599	68	383	1.18277e-79	0.266505	1.81609e-77
1	13564369	13564968	599	28	333	4.59077e-84	0.162305	1.08585e-81	1	15437231	15437830	599	414	1013	2.3452e-86	0.50957	5.2328e-84
1	13598531	13599130	599	89	396	1.02277e-57	0.362521	3.79661e-56	1	15442519	15443118	599	219	659	2.88325e-77	0.436504	3.84327e-75
1	13609181	13609780	599	30	288	1.98844e-67	0.200089	1.48925e-65	1	15456057	15456656	599	60	397	1.97196e-90	0.230104	5.39881e-88
1	13615517	13616116	599	68	348	4.14855e-57	0.327372	1.4756e-55	1	15492945	15493544	599	329	763	1.68528e-59	0.549338	7.56899e-58
1	13617308	13617907	599	71	416	9.15505e-75	0.281823	1.16089e-72	1	15512120	15512719	599	279	777	1.01914e-81	0.461531	1.76417e-79
1	13621917	13622516	599	85	400	3.68237e-61	0.344319	1.7485e-59	1	15518372	15518971	599	161	562	1.27297e-78	0.387421	1.84254e-76
1	13644118	13644717	599	13	303	1.19434e-90	0.0999047	4.09963e-88	1	15534827	15535426	599	173	568	2.85009e-74	0.409405	3.18508e-72
1	13652258	13652857	599	126	586	6.90552e-88	0.329136	2.04334e-85	1	15588363	15588962	599	67	450	4.47277e-103	0.222128	2.15767e-100
1	13652995	13653594	599	76	424	1.10185e-73	0.293312	1.29424e-71	1	15613567	15614166	599	61	355	1.95115e-75	0.262569	2.33524e-73
1	13657455	13658054	599	25	376	1.23972e-101	0.130442	6.9661e-99	1	15626403	15627002	599	127	514	3.78793e-83	0.342252	7.09637e-81
1	13676777	13677376	599	159	598	5.35845e-73	0.398681	5.9875e-71	1	15627641	15628240	599	174	552	2.12356e-69	0.424032	1.76494e-67
1	13709573	13710172	599	93	419	1.21191e-61	0.355341	5.96388e-60	1	15651726	15652325	599	178	591	3.43525e-78	0.403298	4.838e-76
1	13724610	13725209	599	50	334	2.03022e-65	0.261966	1.31279e-63	1	15656130	15656729	599	92	468	1.05849e-90	0.282228	2.93675e-88
1	13734817	13735416	599	74	447	8.21557e-82	0.271061	1.68852e-79	1	15662102	15662701	599	99	506	3.06465e-98	0.277767	1.21052e-95
1	13759458	13760057	599	29	284	4.81443e-67	0.197575	3.50296e-65	1	15670041	15670640	599	98	665	2.797e-152	0.207069	3.69742e-149
1	13776915	13777514	599	83	433	1.15554e-71	0.310203	1.17429e-69	1	15682292	15682891	599	228	724	1.5323e-90	0.411048	4.2181e-88
1	13799086	13799685	599	45	335	1.36606e-69	0.238749	1.19627e-67	1	15683841	15684440	599	117	450	1.03048e-69	0.365087	8.73303e-68
1	13815882	13816481	599	29	267	1.45605e-61	0.210947	7.11557e-60	1	15700564	15701163	599	180	615	6.58717e-84	0.390949	1.28766e-81
1	13840833	13841432	599	122	541	5.82979e-78	0.347381	9.2581e-76	1	15701898	15702497	599	78	399	6.91501e-78	0.288056	9.56265e-76
1	13858092	13858691	599	28	322	2.0041e-80	0.168164	3.75818e-78	1	15703907	15704506	599	256	726	1.84659e-78	0.456767	2.64469e-76
1	13863598	13864197	599	87	444	3.13768e-72	0.315071	3.32092e-70	1	15713371	15713970	599	284	886	5.10263e-108	0.409699	2.94247e-105
1	13874165	13874764	599	71	454	4.65418e-86	0.257149	1.2416e-83	1	15723180	15723779	599	106	413	6.66224e-65	0.365353	4.19341e-63
1	13903493	13904092	599	48	343	1.07285e-69	0.246001	9.46456e-68	1	15732020	15732619	599	188	602	2.34334e-76	0.416154	2.96167e-74
1	13912441	13913040	599	41	389	4.51144e-90	0.188586	1.50198e-87	1	15744873	15745472	599	145	538	3.58165e-80	0.36831	5.6697e-78
1	13945416	13946015	599	89	505	1.88178e-88	0.281008	5.74726e-86	1	15747255	15747854	599	107	413	2.42763e-64	0.368459	1.47595e-62
1	13946881	13947480	599	120	639	1.61962e-106	0.287741	1.06068e-103	1	15757497	15758096	599	115	456	1.25198e-72	0.35448	1.26771e-70
1	13967245	13967844	599	102	602	6.42676e-108	0.264355	4.37644e-105	1	15759233	15759832	599	126	556	1.3304e-96	0.313063	4.88196e-94
1	13971392	13971991	599	39	424	2.56099e-103	0.165212	1.52538e-100	1	15768430	15769029	599	145	513	6.0265e-73	0.387063	6.22285e-71
1	13982489	13983088	599	21	259	1.64313e-66	0.168725	1.15033e-64	1	15779188	15779787	599	79	355	3.16311e-63	0.32942	1.79171e-61
1	13999435	14000034	599	50	356	3.91998e-72	0.244928	4.11502e-70	1	15789852	15790451	599	173	580	1.3144e-77	0.400584	1.78938e-75
1	14005702	14006301	599	28	305	7.93191e-75	0.178087	1.01083e-72	1	15805249	15805848	599	68	608	5.75718e-158	0.164366	7.98717e-155
1	14019207	14019806	599	110	493	6.99019e-72	0.34851	7.2159e-70	1	15807623	15808222	599	108	454	4.13688e-76	0.336467	5.15473e-74
1	14025690	14026289	599	102	466	3.39975e-69	0.345339	2.89352e-67	1	15812992	15813591	599	68	436	1.71801e-97	0.232605	6.56138e-95
1	14049786	14050385	599	54	380	2.14832e-76	0.244278	3.05922e-74	1	15814717	15815316	599	194	538	8.07837e-57	0.481686	3.07006e-55
1	14053285	14053884	599	51	552	8.77979e-134	0.157326	8.82999e-131	1	15816028	15816627	599	67	403	4.4919e-87	0.24937	1.04013e-84
1	14060815	14061414	599	23	383	2.95542e-106	0.119788	1.92073e-103	1	15821068	15821667	599	241	671	8.35737e-71	0.468442	7.57328e-69
1	14066129	14066728	599	47	334	1.04077e-67	0.248506	7.95258e-66	1	15846468	15847067	599	29	280	8.06854e-76	0.18061	9.88207e-74
1	14074690	14075289	599	42	403	1.10312e-93	0.185427	4.42693e-91	1	15865707	15866306	599	77	536	1.0645e-124	0.209094	9.50759e-122
1	14083084	14083683	599	71	416	9.15505e-75	0.281823	1.16089e-72	1	15871539	15872138	599	77	503	2.45279e-113	0.223435	1.66442e-110
1	14093796	14094395	599	95	486	4.8527e-79	0.310061	8.28456e-77	1	15872834	15873433	599	69	386	6.303e-80	0.267732	9.83418e-78
1	14097837	14098436	599	33	316	9.42404e-74	0.196052	1.11145e-71	1	15883365	15883964	599	50	231	1.28113e-42	0.348808	2.03318e-41
1	14110736	14111335	599	45	361	1.05953e-77	0.220661	1.65239e-75	1	15884693	15885292	599	117	457	8.60946e-72	0.359234	8.28405e-70
1	14112104	14112703	599	43	379	4.27309e-85	0.201745	1.07847e-82	1	15920446	15921045	599	47	325	4.9066e-76	0.230322	6.07964e-74
1	14113177	14113776	599	105	471	8.30525e-69	0.35053	6.87359e-67	1	15924693	15925292	599	72	365	5.84887e-71	0.294774	5.34375e-69
1	14161562	14162161	599	21	286	1.52242e-75	0.15187	2.04243e-73	1	15950920	15951519	599	21	314	8.23787e-97	0.123886	3.05351e-94
1	14169872	14170471	599	53	428	4.21292e-92	0.212157	1.56174e-89	1	15958213	15958812	599	44	316	2.29215e-75	0.224357	2.72951e-73
1	14174493	14175092	599	13	283	1.1251e-83	0.107397	2.59742e-81	1	15964663	15965262	599	30	303	3.01817e-83	0.170748	5.69005e-81
1	14178695	14179294	599	106	490	2.094e-73	0.339213	2.41103e-71	1	15968000	15968599	599	52	488	1.54469e-129	0.163825	1.50763e-126
1	14188342	14188941	599	60	406	9.64498e-80	0.249588	1.72699e-77	1	16000275	16000874	599	44	337	1.0126e-82	0.209622	1.85357e-80
1	14196685	14197284	599	95	453	8.61078e-70	0.333734	7.63922e-68	1	16054750	16055349	599	115	438	2.79693e-67	0.369754	2.03631e-65
1	14200374	14200973	599	59	489	2.75516e-106	0.202426	1.79328e-103	1	16061134	16061733	599	32	292	2.39165e-77	0.187151	3.20791e-75
1	14213593	14214192	599	54	404	8.58385e-84	0.229052	1.99792e-81	1	16063035	16063634	599	20	283	3.40284e-86	0.133182	7.52908e-84
1	14225612	14226211	599	216	668	1.09303e-63	0.471856	6.23213e-62	1	16080179	16080778	599	85	412	2.20678e-77	0.30058	2.96504e-75
1	14227100	14227699	599	114	586	2.78617e-95	0.300567	1.20841e-92	1	16085033	16085632	599	82	467	2.11665e-97	0.25531	8.05317e-95
1	14261781	14262380	599	196	578	1.21576e-51	0.501132	2.94763e-50	1	16088134	16088733	599	35	375	9.67145e-105	0.154705	4.97023e-102
1	14306862	14307461	599	118	464	8.42203e-60	0.395675	3.62854e-58	1	16088768	16089367	599	114	457	1.67513e-73	0.350883	1.78598e-71
1	14325536	14326135	599	96	498	8.29204e-82	0.305105	1.70375e-79	1	16123705	16124304	599	117	563	1.57788e-104	0.288901	8.04874e-102
1	14327389	14327988	599	123	511	2.17284e-69	0.371438	1.8746e-67	1	16152077	16152676	599	31	302	6.44484e-82	0.175977	1.12667e-79
1	14331075	14331674	599	74	428	3.26187e-76	0.283686	4.58675e-74	1	16174415	16175014	599	94	429	5.82485e-77	0.315163	7.62927e-75
1	14332524	14333123	599	39	335	1.4964e-74	0.211675	1.87019e-72	1	16190004	16190603	599	121	608	2.72426e-116	0.274924	2.0032e-113
1	14433363	14433962	599	171	690	2.12694e-90	0.367395	7.20339e-88	1	16194164	16194763	599	60	444	9.99317e-107	0.20462	5.51617e-104
1	14441705	14442304	599	149	598	3.62129e-78	0.375592	5.83294e-76	1	16212083	16212682	599	83	452	1.01258e-91	0.267044	2.95438e-89
1	14451124	14451723	599	57	430	1.86284e-89	0.224782	6.00362e-87	1	16241741	16242340	599	59	351	1.40653e-75	0.258146	1.69793e-73
1	14453065	14453664	599	82	477	4.60864e-85	0.277308	1.15919e-82	1	16268546	16269145	599	55	389	1.06412e-91	0.21804	3.1013e-89
1	14474033	14474632	599	125	409	8.06356e-43	0.475875	1.08404e-41	1	16270820	16271419	599	101	504	3.04402e-96	0.283975	1.09931e-93
1	14484059	14484658	599	85	452	8.52707e-76	0.302897	1.163e-73	1	16279968	16280567	599	220	721	1.41736e-93	0.399296	4.52383e-91
1	14498710	14499309	599	165	615	2.80646e-74	0.400649	3.4419e-72	1	16291391	16291990	599	16	256	1.68468e-80	0.125146	2.71874e-78
1	14507242	14507841	599	109	577	6.11518e-96	0.293318	2.73488e-93	1	16337005	16337604	599	275	754	1.37416e-77	0.469709	1.86781e-75
1	14590439	14591038	599	73	508	6.39403e-101	0.234289	3.49924e-98	1	16348006	16348605	599	26	184	3.06179e-44	0.258998	5.36479e-43
1	14609968	14610567	599	47	257	1.05366e-44	0.327998	1.60114e-43	1	16350709	16351308	599	24	274	1.49583e-78	0.158872	2.15439e-76
1	14677451	14678050	599	35	352	1.40176e-83	0.18364	3.21944e-81	1	16378178	16378777	599	84	366	1.49002e-63	0.336847	8.61831e-62
1	14690552	14691151	599	31	338	8.86482e-83	0.173503	1.93622e-80	1	16409610	16410209	599	50	330	2.33852e-75	0.238916	2.78317e-73
1	14707938	14708537	599	36	294	3.99391e-64	0.227343	2.34937e-62	1	16411900	16412499	599	134	504	3.18354e-76	0.36685	3.99015e-74
1	14718478	14719077	599	35	310	4.73047e-70	0.209996	4.28179e-68	1	16413848	16414447	599	89	395	1.80865e-69	0.327314	1.50872e-67
1	14720006	14720605	599	37	344	3.54515e-79	0.197007	6.11675e-77	1	16415847	16416446	599	37	403	4.70763e-113	0.150185	3.16943e-110
1	14720758	14721357	599	109	613	2.51102e-106	0.275407	1.63666e-103	1	16417213	16417812	599	99	513	1.64311e-100	0.27381	7.13706e-98
1	14721371	14721970	599	205	969	4.17972e-146	0.305808	4.65232e-143	1	16425165	16425764	599	31	331	1.5523e-92	0.159726	4.70932e-90
1	14721971	14722570	599	87	519	6.06862e-94	0.26762	2.46811e-91	1	16430356	16430955	599	39	355	1.3534e-93	0.179307	4.32374e-91
1	14914111	14914710	599	8	248	5.64601e-78	0.0888579	8.9747e-76	1	16433716	16434315	599	89	373	1.09288e-62	0.347641	5.99289e-61
1	14924383	14924982	599	134	557	1.63979e-75	0.367025	2.19594e-73	1	16446588	16447187	599	65	323	3.96385e-62	0.306578	2.09812e-60
1	14925091	14925690	599	182	670	1.21934e-79	0.401248	2.17045e-77	1	16456357	16456956	599	67	439	2.67058e-99	0.227963	1.10352e-96
1	14928338	14928937	599	59	289	3.94579e-46	0.352023	6.58108e-45	1	16458803	16459402	599	35	331	1.17803e-88	0.176448	2.95378e-86
1	15011824	15012423	599	27	229	3.54091e-51	0.234511	8.31375e-50	1	16462165	16462764	599	16	198	1.40131e-58	0.164642	5.94145e-57
1	15037176	15037775	599	71	389	6.81276e-67	0.3024	4.90251e-65	1	16478933	16479532	599	178	557	7.22862e-69	0.428977	5.8178e-67
1	15060159	15060758	599	124	488	7.43233e-63	0.392627	3.98559e-61	1	16485959	16486558	599	185	638	7.40595e-88	0.385964	1.78165e-85
1	15060846	15061445	599	127	562	9.15953e-81	0.346273	1.75804e-78	1	16504705	16505304	599	80	490	1.346e-106	0.237532	7.39798e-104
1	15082278	15082877	599	7368	13192	3.45845952088873e-323	0.686228	7.34972054753438e-320	1	16509696	16510295	599	478	1993	0	0.291733	0
1	15084149	15084748	599	14512	22552	2.97213e-264	0.78227	5.43101e-261	1	16510405	16511004	599	204	687	4.90759e-92	0.391331	1.45425e-89
1	15099591	15100190	599	270	709	6.51595e-52	0.546488	1.60924e-50	1	16511303	16511902	599	680	1500	3.54951e-104	0.547039	1.78711e-101
1	15100417	15101016	599	282	920	1.18209e-93	0.434715	4.73563e-91	1	16512617	16513216	599	112	648	9.41028e-136	0.239899	1.00836e-132
1	15136440	15137039	599	244	751	6.9811e-71	0.468221	6.70763e-69	1	16518890	16519489	599	314	1142	1.09706e-164	0.346612	1.59865e-161
1	15142203	15142802	599	19	337	4.15867e-95	0.118222	1.79118e-92	1	16519501	16520100	599	214	677	2.08696e-84	0.415422	4.19094e-82
1	15179474	15180073	599	167	672	7.63419e-88	0.369465	2.25518e-85	1	16520503	16521102	599	410	895	1.30235e-61	0.573745	6.66913e-60
1	15191704	15192303	599	63	410	1.03979e-78	0.257736	1.7357e-76	1	16521423	16522022	599	156	610	2.6171e-95	0.345555	9.04423e-93
1	15205825	15206424	599	139	550	5.2586e-71	0.384549	5.09762e-69	1	16550419	16551018	599	82	390	2.44166e-72	0.308409	2.42891e-70
1	15425219	15425818	599	81	410	2.05267e-66	0.321449	1.42691e-64	1	16554629	16555228	599	75	363	2.5724e-68	0.307339	2.00083e-66
1	15426110	15426709	599	60	400	6.38408e-78	0.25352	1.01077e-75	1	16569151	16569750	599	121	433	1.3951e-62	0.391887	7.59052e-61
1	15436753	15437352	599	196	708	2.99829e-82	0.405846	6.33681e-80	1	16580018	16580617	599	43	314	1.68983e-75	0.221526	2.02979e-73
1	15437366	15437965	599	277	1143	7.39741e-152	0.341752	8.54136e-149	1	16581449	16582048	599	234	654	1.96431e-69	0.468025	1.63522e-67
1	15483840	15484439	599	52	372	1.71617e-75	0.241837	2.29187e-73	1	16585168	16585767	599	220	742	2.03744e-99	0.387584	8.45652e-97
1	15512149	15512748	599	193	705	5.73434e-83	0.401847	1.26782e-80	1	16621814	16622413	599	64	560	2.22803e-144	0.169823	2.70311e-141
1	15512901	15513500	599	92	460	1.35869e-73	0.319125	1.58683e-71	1	16625829	16626428	599	74	403	5.70207e-82	0.272109	1.00072e-79
1	15517953	15518552	599	196	605	1.05965e-57	0.477869	3.93105e-56	1	16636504	16637103	599	206	609	6.31093e-70	0.44759	5.4197e-68
1	15531444	15532043	599	100	472	4.956e-72	0.334736	5.17308e-70	1	16642093	16642692	599	68	358	1.99688e-71	0.286125	1.87897e-69
1	15534824	15535423	599	128	526	1.28485e-70	0.373684	1.21198e-68	1	16645340	16645939	599	56	514	3.4072e-135	0.165393	3.62111e-132
1	15536213	15536812	599	169	620	1.50466e-73	0.406158	1.75252e-71	1	16648249	16648848	599	99	450	2.17238e-80	0.314022	3.48133e-78
1	15569858	15570457	599	59	410	1.00742e-81	0.243458	2.05569e-79	1	16660460	16661059	599	41	610	2.51112e-186	0.106098	4.08062e-183
1	15572548	15573147	599	141	609	1.9094e-85	0.35037	4.91904e-83	1	16701163	16701762	599	19	363	5.86835e-118	0.0984374	4.5033e-115
1	15588313	15588912	599	73	448	8.07084e-83	0.267206	1.76814e-80	1	16718411	16719010	599	90	432	1.76336e-80	0.300943	2.84314e-78
1	15599460	15600059	599	73	370	3.63591e-60	0.326636	1.60771e-58	1	16732678	16733277	599	181	546	1.53378e-64	0.444813	9.44112e-63
1	15613195	15613794	599	62	390	1.95095e-73	0.267878	2.24955e-71	1	16734102	16734701	599	66	396	1.80965e-85	0.250684	3.85091e-83
1	15613980	15614579	599	36	306	6.44535e-68	0.217919	5.00409e-66	1	16742756	16743355	599	89	566	1.81438e-125	0.224659	1.64525e-122
1	15649613	15650212	599	72	388	6.07126e-66	0.30697	4.08257e-64	1	16745875	16746474	599	129	568	1.7862e-98	0.3128	7.12354e-96
1	15656128	15656727	599	63	435	2.71309e-86	0.242222	7.33351e-84	1	16750663	16751262	599	154	467	7.76839e-56	0.451251	2.7774e-54
1	15662103	15662702	599	69	415	7.19305e-76	0.275537	9.86721e-74	1	16796121	16796720	599	36	333	1.93397e-88	0.179463	4.79506e-86
1	15670012	15670611	599	78	567	3.83218e-115	0.221492	3.08937e-112	1	16848084	16848683	599	31	329	8.44852e-92	0.160751	2.47394e-89
1	15689126	15689725	599	16	250	8.97391e-69	0.142526	7.40457e-67	1	16868619	16869218	599	31	254	1.25759e-64	0.211445	7.78187e-63
1	15713376	15713975	599	257	728	1.28601e-60	0.507651	5.88024e-59	1	16881174	16881773	599	107	467	1.03501e-80	0.323939	1.69061e-78
1	15725528	15726127	599	68	440	4.70388e-84	0.255849	1.11167e-81	1	16882864	16883463	599	137	549	6.65508e-88	0.342375	1.60665e-85
1	15731999	15732598	599	150	518	1.56221e-57	0.438936	5.72184e-56	1	16906840	16907439	599	36	352	2.44591e-95	0.169264	8.46499e-93
1	15747254	15747853	599	121	427	5.4732e-49	0.441608	1.10633e-47	1	16924538	16925137	599	83	423	2.95473e-82	0.286262	5.26578e-80
1	15767892	15768491	599	35	400	2.6535e-99	0.160533	1.36637e-96	1	16963675	16964274	599	81	391	2.61019e-73	0.304251	2.75503e-71
1	15771006	15771605	599	66	368	3.7215e-64	0.300702	2.19391e-62	1	16964627	16965226	599	43	367	2.99661e-94	0.187924	9.87126e-92
1	15780694	15781293	599	30	283	8.14494e-66	0.203838	5.41662e-64	1	16974742	16975341	599	17	234	5.10004e-71	0.144083	4.6751e-69
1	15789323	15789922	599	46	383	8.57335e-84	0.211244	1.99585e-81	1	17000105	17000704	599	89	406	6.62625e-73	0.318006	6.81745e-71
1	15805252	15805851	599	53	540	5.69083e-128	0.166374	5.42898e-125	1	17017455	17018054	599	38	259	1.72299e-60	0.244943	8.23097e-59
1	15807663	15808262	599	93	468	3.21874e-75	0.316462	4.22067e-73	1	17019628	17020227	599	77	420	1.93241e-85	0.269861	4.10389e-83
1	15812992	15813591	599	43	401	3.86412e-92	0.190129	1.4358e-89	1	17057021	17057620	599	54	313	1.49048e-66	0.269882	1.0391e-64
1	15816028	15816627	599	51	391	3.628e-82	0.225708	7.62148e-80	1	17072641	17073240	599	228	568	9.0166e-51	0.52899	2.35644e-49
1	15821060	15821659	599	173	555	5.55247e-56	0.465753	1.82476e-54	1	17076769	17077368	599	37	243	8.80061e-56	0.256386	3.13499e-54
1	15853104	15853703	599	56	374	4.83077e-73	0.256309	5.41706e-71	1	17085033	17085632	599	75	396	5.65183e-79	0.280463	8.34213e-77
1	15865694	15866293	599	64	502	3.27867e-106	0.211383	2.12785e-103	1	17096574	17097173	599	175	513	1.52227e-58	0.460152	6.4289e-57
1	15867672	15868271	599	103	479	3.63444e-72	0.338497	3.83152e-70	1	17121417	17122016	599	37	205	5.6579e-43	0.307442	9.18443e-42
1	15871547	15872146	599	66	439	3.07829e-85	0.249847	7.83117e-83	1	17130104	17130703	599	35	294	2.47045e-75	0.200004	2.93621e-73
1	15895098	15895697	599	61	383	4.56335e-72	0.269195	4.77045e-70	1	17156394	17156993	599	73	564	7.85873e-138	0.189168	8.7022e-135
1	15912810	15913409	599	29	336	4.57509e-84	0.165393	1.08244e-81	1	17157256	17157855	599	57	454	8.13343e-113	0.191217	5.43708e-110
1	15920350	15920949	599	46	396	6.53088e-88	0.203962	1.93658e-85	1	17160830	17161429	599	108	486	5.34681e-86	0.313323	1.1698e-83
1	15924691	15925290	599	61	356	4.60776e-64	0.290723	2.69888e-62	1	17161768	17162367	599	128	705	4.44074e-143	0.248094	5.28908e-140
1	15950919	15951518	599	20	324	1.64973e-89	0.128174	5.33134e-87	1	17164803	17165402	599	67	464	6.60431e-108	0.215116	3.7945e-105
1	15968000	15968599	599	51	459	1.20923e-103	0.19077	7.27207e-101	1	17165892	17166491	599	164	583	4.65287e-83	0.379285	8.68058e-81
1	16039091	16039690	599	47	312	5.32577e-61	0.267048	2.50167e-59	1	17171894	17172493	599	142	561	1.2327e-88	0.345895	3.08848e-86
1	16054965	16055564	599	51	426	3.76434e-93	0.206282	1.47166e-90	1	17176565	17177164	599	56	381	4.05799e-88	0.226345	9.89523e-86
1	16061131	16061730	599	39	308	4.91004e-66	0.231323	3.32155e-64	1	17198150	17198749	599	37	221	2.60684e-48	0.283696	5.86096e-47
1	16062994	16063593	599	30	337	2.04139e-83	0.169466	4.64251e-81	1	17207527	17208126	599	33	354	5.24456e-99	0.156608	2.14114e-96
1	16080166	16080765	599	61	411	1.66191e-80	0.249963	3.1368e-78	1	17213561	17214160	599	92	426	2.74435e-77	0.311443	3.66542e-75
1	16088117	16088716	599	24	338	7.24886e-90	0.141295	2.38849e-87	1	17234496	17235095	599	78	422	2.16469e-85	0.2716	4.5851e-83
1	16115531	16116130	599	61	325	4.62695e-55	0.320043	1.42424e-53	1	17247412	17248011	599	52	393	1.3357e-95	0.205553	4.68114e-93
1	16136449	16137048	599	61	394	2.28965e-75	0.261301	3.03089e-73	1	17275671	17276270	599	66	407	3.51833e-89	0.243573	9.05709e-87
1	16152460	16153059	599	35	329	3.84793e-76	0.197205	5.38985e-74	1	17284698	17285297	599	46	334	5.52742e-80	0.219726	8.6508e-78
1	16174426	16175025	599	69	426	3.90179e-79	0.268078	6.70981e-77	1	17290833	17291432	599	25	170	3.35945e-40	0.273368	4.61255e-39
1	16190193	16190792	599	106	580	8.91856e-99	0.284486	4.50018e-96	1	17299290	17299889	599	28	370	3.57869e-110	0.130795	2.21299e-107
1	16212083	16212682	599	63	392	2.60115e-73	0.270179	2.97435e-71	1	17301433	17302032	599	184	631	2.17686e-86	0.388462	4.86385e-84
1	16268539	16269138	599	36	391	2.26684e-95	0.168294	9.88206e-93	1	17305292	17305891	599	40	353	5.94054e-92	0.184237	1.75292e-89
1	16270773	16271372	599	59	388	4.88463e-75	0.257977	6.31603e-73	1	17315338	17315937	599	80	422	5.43195e-84	0.277755	1.06658e-81
1	16279973	16280572	599	178	714	6.43992e-93	0.367972	2.48689e-90	1	17316717	17317316	599	49	535	1.18218e-149	0.141448	1.52509e-146
1	16334971	16335570	599	50	302	8.002e-56	0.291381	2.59853e-54	1	17318044	17318643	599	26	198	3.8809e-49	0.239388	9.16907e-48
1	16336992	16337591	599	169	594	4.05101e-67	0.424674	2.96409e-65	1	17319952	17320551	599	143	580	9.11623e-94	0.336249	2.93418e-91
1	16344502	16345101	599	9	221	4.0468e-67	0.108484	2.9611e-65	1	17320849	17321448	599	123	618	3.62764e-118	0.274351	2.79881e-115
1	16345520	16346119	599	64	346	3.9773e-59	0.312369	1.6334e-57	1	17329179	17329778	599	14	230	6.51255e-73	0.127177	6.70693e-71
1	16348063	16348662	599	18	206	6.40128e-52	0.191415	1.58224e-50	1	17334770	17335369	599	50	254	5.76098e-50	0.315269	1.43254e-48
1	16350724	16351323	599	16	243	2.14755e-66	0.146901	1.49066e-64	1	17338925	17339524	599	56	426	8.51367e-104	0.201306	4.22177e-101
1	16378197	16378796	599	58	365	7.40583e-69	0.271062	6.1533e-67	1	17360712	17361311	599	114	636	2.59751e-130	0.248553	2.57083e-127
1	16407097	16407696	599	45	349	6.05031e-74	0.228661	7.23914e-72	1	17365476	17366075	599	95	503	5.10762e-100	0.269352	2.17296e-97
1	16415849	16416448	599	41	404	6.41604e-95	0.181238	2.73592e-92	1	17382179	17382778	599	62	311	2.82276e-60	0.306218	1.33032e-58
1	16417190	16417789	599	60	412	1.43832e-81	0.245773	2.90736e-79	1	17383618	17384217	599	40	262	6.22787e-60	0.252554	2.87316e-58
1	16425167	16425766	599	32	359	1.02267e-88	0.167099	3.16627e-86	1	17394215	17394814	599	49	354	1.80925e-84	0.218072	3.64642e-82
1	16430375	16430974	599	10	319	2.5967e-100	0.078822	1.38993e-97	1	17409053	17409652	599	55	338	3.29712e-74	0.252811	3.67058e-72
1	16431345	16431944	599	59	358	4.69654e-66	0.280771	3.18217e-64	1	17412093	17412692	599	86	448	2.57074e-88	0.278186	6.33795e-86
1	16433847	16434446	599	34	346	1.47607e-82	0.182581	3.18043e-80	1	17450420	17451019	599	39	322	9.2702e-82	0.198744	1.60811e-79
1	16446587	16447186	599	57	348	1.65738e-64	0.280772	1.00158e-62	1	17466805	17467404	599	248	770	1.40671e-93	0.417151	4.49078e-91
1	16456442	16457041	599	49	433	4.31707e-97	0.195969	2.03096e-94	1	17483504	17484103	599	18	293	2.76995e-92	0.118454	8.30781e-90
1	16458756	16459355	599	28	298	1.56155e-72	0.182516	1.68898e-70	1	17486218	17486817	599	77	407	3.54189e-81	0.278913	5.94165e-79
1	16473524	16474123	599	9	221	4.0468e-67	0.108484	2.9611e-65	1	17506333	17506932	599	12	223	1.25541e-72	0.117737	1.27116e-70
1	16504706	16505305	599	47	396	4.67745e-87	0.207722	1.32101e-84	1	17515016	17515615	599	108	450	6.87242e-75	0.339599	7.96487e-73
1	16509824	16510423	599	493	1916	5.58007e-238	0.347387	9.34888e-235	1	17515863	17516462	599	89	524	2.7854e-111	0.243471	1.78044e-108
1	16511332	16511931	599	254	942	3.92223e-112	0.384578	2.95895e-109	1	17522186	17522785	599	123	472	7.06919e-73	0.363415	7.26157e-71
1	16512584	16513183	599	101	715	1.16001e-142	0.219136	1.25581e-139	1	17526314	17526913	599	34	282	6.06928e-72	0.204096	5.88823e-70
1	16518823	16519422	599	216	1021	7.66224e-154	0.304194	8.95554e-151	1	17535434	17536033	599	154	615	6.07476e-98	0.338595	2.36799e-95
1	16519482	16520081	599	206	768	2.5793e-92	0.390666	9.65705e-90	1	17566888	17567487	599	47	294	2.08019e-65	0.256078	1.34899e-63
1	16520503	16521102	599	314	857	9.3645e-67	0.517611	6.67048e-65	1	17568989	17569588	599	99	482	1.61488e-90	0.292238	4.43974e-88
1	16521433	16522032	599	164	640	3.80595e-81	0.38224	7.48911e-79	1	17578943	17579542	599	27	290	1.97548e-81	0.164288	3.36382e-79
1	16527899	16528498	599	65	422	7.57045e-81	0.25696	1.46167e-78	1	17581997	17582596	599	102	409	5.5061e-66	0.356542	3.70329e-64
1	16550419	16551018	599	58	412	4.15142e-83	0.238658	9.26216e-81	1	17584354	17584953	599	81	398	1.50962e-75	0.298631	1.8182e-73
1	16554620	16555219	599	68	382	7.09492e-67	0.296771	5.10118e-65	1	17612277	17612876	599	102	514	8.59767e-99	0.280682	3.47798e-96
1	16569145	16569744	599	75	438	1.86219e-78	0.280196	3.05545e-76	1	17616740	17617339	599	88	361	1.25564e-59	0.356208	5.68425e-58
1	16580020	16580619	599	29	333	4.48311e-83	0.166966	9.96913e-81	1	17627333	17627932	599	53	369	2.13937e-86	0.223256	4.78268e-84
1	16607752	16608351	599	31	327	3.55532e-79	0.179668	6.13177e-77	1	17637928	17638527	599	68	306	8.49371e-55	0.337673	2.84118e-53
1	16610848	16611447	599	38	356	3.84574e-82	0.194278	8.06805e-80	1	17638661	17639260	599	96	380	1.0003e-60	0.364782	4.84173e-59
1	16621815	16622414	599	68	574	1.59695e-125	0.193801	1.48428e-122	1	17646859	17647458	599	48	420	1.02711e-108	0.179025	6.06198e-106
1	16623734	16624333	599	71	438	2.82813e-81	0.266997	5.61293e-79	1	17662260	17662859	599	140	506	1.44324e-73	0.380248	1.54637e-71
1	16636504	16637103	599	145	542	6.90854e-66	0.405863	4.62126e-64	1	17669812	17670411	599	83	405	1.82852e-76	0.299628	2.3272e-74
1	16645305	16645904	599	53	551	1.48361e-131	0.162911	1.46682e-128	1	17671455	17672054	599	153	558	1.11848e-81	0.372452	1.93127e-79
1	16655621	16656220	599	50	364	1.35142e-74	0.239263	1.69557e-72	1	17716798	17717397	599	19	297	1.21052e-92	0.121664	3.69272e-90
1	16660462	16661061	599	29	530	1.02471e-149	0.102536	1.16843e-146	1	17751752	17752351	599	50	350	2.95701e-82	0.22454	5.2682e-80
1	16687248	16687847	599	26	318	4.32855e-81	0.160574	8.478e-79	1	17753219	17753818	599	54	324	3.06191e-70	0.26021	2.68067e-68
1	16701163	16701762	599	27	334	2.10903e-85	0.157134	5.41519e-83	1	17763047	17763646	599	39	340	3.39659e-88	0.187655	8.32168e-86
1	16720860	16721459	599	21	243	3.33799e-61	0.180569	1.59027e-59	1	17769579	17770178	599	25	261	9.45756e-73	0.172781	9.64836e-71
1	16732743	16733342	599	136	578	5.68574e-80	0.357948	1.03456e-77	1	17781524	17782123	599	75	445	3.31934e-95	0.248156	1.14245e-92
1	16734175	16734774	599	22	376	5.24091e-105	0.11796	3.28532e-102	1	17782803	17783402	599	49	345	2.44575e-81	0.224072	4.14151e-79
1	16736045	16736644	599	110	453	3.40318e-61	0.380768	1.62048e-59	1	17786209	17786808	599	127	574	1.37659e-101	0.305025	6.25394e-99
1	16742757	16743356	599	82	502	1.90486e-92	0.262889	7.18654e-90	1	17787056	17787655	599	61	346	1.94763e-72	0.269771	1.94902e-70
1	16798487	16799086	599	43	313	2.25545e-64	0.246838	1.35228e-62	1	17789558	17790157	599	145	451	1.05984e-55	0.442876	3.75393e-54
1	16846103	16846702	599	40	415	2.00708e-99	0.172588	1.03898e-96	1	17792050	17792649	599	68	376	2.4542e-77	0.271726	3.2882e-75
1	16848183	16848782	599	26	385	1.37426e-103	0.131271	8.25091e-101	1	17801683	17802282	599	64	440	4.8766e-102	0.218499	2.2579e-99
1	16881204	16881803	599	65	451	1.20256e-89	0.23967	3.91245e-87	1	17826014	17826613	599	72	372	3.15537e-73	0.288939	3.31192e-71
1	16882923	16883522	599	117	485	8.25574e-66	0.374869	5.48988e-64	1	17848173	17848772	599	122	594	3.93983e-111	0.283784	2.50758e-108
1	16899353	16899952	599	84	387	3.51556e-58	0.352751	1.34826e-56	1	17865811	17866410	599	131	427	7.94392e-56	0.427446	2.83821e-54
1	16906819	16907418	599	19	333	9.82631e-94	0.119721	3.95673e-91	1	17884200	17884799	599	93	422	2.13135e-75	0.317594	2.5435e-73
1	16924535	16925134	599	64	463	4.19172e-94	0.230037	1.72021e-91	1	17898699	17899298	599	9	217	3.91562e-74	0.0996142	4.33693e-72
1	16951254	16951853	599	23	281	8.22331e-72	0.166112	8.43445e-70	1	17908284	17908883	599	159	760	9.29866e-140	0.279885	1.05872e-136
1	16960024	16960623	599	36	326	2.73467e-74	0.203816	3.35789e-72	1	17915810	17916409	599	77	410	3.70138e-82	0.276771	6.56401e-80
1	16963675	16964274	599	70	454	8.56495e-87	0.253965	2.38464e-84	1	17920918	17921517	599	32	229	5.70159e-55	0.242319	1.93013e-53
1	16964636	16965235	599	31	332	8.21996e-81	0.176813	1.58312e-78	1	17923642	17924241	599	190	642	1.88708e-86	0.393054	4.2323e-84
1	16974704	16975303	599	22	248	7.0962e-62	0.183203	3.54622e-60	1	17936654	17937253	599	39	421	1.11182e-117	0.149883	8.47543e-115
1	17017461	17018060	599	23	313	1.64018e-82	0.148189	3.52093e-80	1	17937610	17938209	599	95	452	1.4e-83	0.301219	2.68845e-81
1	17019269	17019868	599	16	316	1.96045e-91	0.111176	7.01032e-89	1	17942553	17943152	599	85	402	3.35182e-74	0.308435	3.72965e-72
1	17073387	17073986	599	55	379	2.54841e-75	0.248857	3.36225e-73	1	17944882	17945481	599	88	442	5.1964e-85	0.28798	1.07797e-82
1	17121420	17122019	599	23	230	4.87147e-55	0.205545	1.49711e-53	1	17954979	17955578	599	64	383	1.35334e-82	0.252751	2.45992e-80
1	17130052	17130651	599	20	273	3.15467e-72	0.153653	3.33774e-70	1	17970359	17970958	599	17	240	2.76866e-73	0.140247	2.91861e-71
1	17156390	17156989	599	71	526	5.06957e-108	0.220472	3.46185e-105	1	17971343	17971942	599	32	283	4.19192e-74	0.193464	4.6363e-72
1	17157220	17157819	599	45	418	8.12782e-96	0.18915	3.61821e-93	1	17983173	17983772	599	137	533	4.02674e-83	0.353102	7.53468e-81
1	17158162	17158761	599	82	382	5.4049e-58	0.350035	2.04637e-56	1	18040845	18041444	599	47	315	1.38323e-72	0.238053	1.39512e-70
1	17161768	17162367	599	142	670	1.87399e-101	0.319328	1.04643e-98	1	18042765	18043364	599	131	394	6.66896e-47	0.465101	1.37489e-45
1	17164795	17165394	599	43	418	1.27529e-97	0.182021	6.13856e-95	1	18079817	18080416	599	26	314	2.3904e-91	0.146542	6.84674e-89
1	17165881	17166480	599	152	601	2.31873e-77	0.380537	3.53305e-75	1	18091166	18091765	599	39	300	5.7721e-74	0.214184	6.33343e-72
1	17170331	17170930	599	36	330	1.42954e-75	0.201208	1.92082e-73	1	18101346	18101945	599	57	443	6.29309e-109	0.196193	3.73955e-106
1	17171897	17172496	599	120	531	2.0869e-76	0.348935	2.97503e-74	1	18104690	18105289	599	25	265	3.20597e-74	0.170012	3.57182e-72
1	17176561	17177160	599	37	356	4.82761e-83	0.190015	1.07144e-80	1	18109986	18110585	599	101	522	4.6204e-102	0.273757	2.14119e-99
1	17192818	17193417	599	17	294	1.13355e-82	0.125547	2.45896e-80	1	18111083	18111682	599	124	494	7.28543e-79	0.349068	1.06838e-76
1	17198151	17198750	599	32	203	3.30642e-39	0.306105	3.53741e-38	1	18118041	18118640	599	41	282	5.1068e-66	0.238472	3.43896e-64
1	17205879	17206478	599	6	225	1.14875e-72	0.0825419	1.2548e-70	1	18138670	18139269	599	22	279	1.65957e-82	0.145568	3.00073e-80
1	17207623	17208222	599	24	276	3.68749e-69	0.175073	3.12893e-67	1	18198897	18199496	599	116	465	9.36472e-75	0.350034	1.07492e-72
1	17213599	17214198	599	78	386	1.54366e-61	0.331219	7.52985e-60	1	18202644	18203243	599	102	479	1.31313e-87	0.302149	3.12401e-85
1	17234489	17235088	599	46	379	1.56949e-82	0.213589	3.37509e-80	1	18209864	18210463	599	72	458	7.01565e-102	0.232281	3.22575e-99
1	17247419	17248018	599	41	458	1.47131e-112	0.1589	1.12035e-109	1	18217963	18218562	599	42	369	7.11603e-96	0.183185	2.52701e-93
1	17261370	17261969	599	30	363	5.11981e-92	0.1567	1.88792e-89	1	18219077	18219676	599	58	400	4.57098e-93	0.221682	1.42333e-90
1	17264926	17265525	599	5	224	8.20719e-74	0.0746763	9.73223e-72	1	18224069	18224668	599	78	409	3.89064e-81	0.280665	6.51434e-79
1	17284701	17285300	599	26	337	1.99047e-87	0.151032	5.74426e-85	1	18230780	18231379	599	20	243	3.59928e-71	0.15659	3.33561e-69
1	17296341	17296940	599	48	301	5.90717e-57	0.282395	2.07701e-55	1	18296309	18296908	599	73	336	4.72846e-61	0.325575	2.33624e-59
1	17297282	17297881	599	108	498	2.04752e-74	0.339189	2.53397e-72	1	18307343	18307942	599	7	233	3.19323e-83	0.0786133	6.01216e-81
1	17299294	17299893	599	25	340	1.77361e-89	0.145029	5.71985e-87	1	18332026	18332625	599	62	459	2.69134e-110	0.203334	1.66957e-107
1	17301387	17301986	599	168	644	4.14698e-80	0.3883	7.61385e-78	1	18333339	18333938	599	140	556	2.7869e-88	0.344637	6.86174e-86
1	17305132	17305731	599	37	323	1.85107e-72	0.210547	1.98946e-70	1	18342268	18342867	599	62	361	1.05078e-76	0.261648	1.35639e-74
1	17315246	17315845	599	39	348	1.08306e-78	0.203345	1.80681e-76	1	18345330	18345929	599	55	355	5.50241e-80	0.240066	8.61478e-78
1	17316681	17317280	599	48	507	6.52598e-122	0.163251	5.81617e-119	1	18367734	18368333	599	56	361	2.96796e-81	0.239559	5.00087e-79
1	17319951	17320550	599	114	503	2.75926e-72	0.352472	2.93249e-70	1	18373208	18373807	599	63	374	2.55888e-80	0.25562	4.08144e-78
1	17320885	17321484	599	76	513	3.70357e-100	0.240287	1.97099e-97	1	18454764	18455363	599	25	312	1.17337e-91	0.143002	3.41223e-89
1	17329187	17329786	599	13	316	3.39374e-95	0.0955641	1.46707e-92	1	18456471	18457070	599	38	294	1.04551e-72	0.214124	1.06414e-70
1	17338926	17339525	599	42	378	1.19112e-85	0.198336	3.10251e-83	1	18460184	18460783	599	85	368	1.46447e-63	0.338463	8.4805e-62
1	17360713	17361312	599	76	508	1.21826e-98	0.242758	6.10967e-96	1	18472260	18472859	599	29	277	9.93954e-75	0.182685	1.13991e-72
1	17365474	17366073	599	86	462	5.20548e-78	0.299133	8.28681e-76	1	18481198	18481797	599	16	235	1.6374e-72	0.137086	1.64574e-70
1	17383185	17383784	599	20	320	3.81531e-88	0.129867	1.14594e-85	1	18485074	18485673	599	74	506	9.303e-117	0.2144	6.92822e-114
1	17383896	17384495	599	30	344	1.00338e-85	0.165832	2.62419e-83	1	18503597	18504196	599	67	366	9.46693e-75	0.275941	1.08638e-72
1	17387627	17388226	599	22	272	7.93659e-70	0.166072	7.06655e-68	1	18517115	18517714	599	53	331	2.306e-73	0.250348	2.43987e-71
1	17390530	17391129	599	9	254	1.01773e-78	0.0935286	1.70073e-76	1	18535670	18536269	599	115	463	9.91266e-75	0.348871	1.13706e-72
1	17394221	17394820	599	38	312	4.0191e-68	0.223297	3.16206e-66	1	18549328	18549927	599	71	410	1.88276e-86	0.257677	4.22283e-84
1	17412147	17412746	599	52	389	9.67671e-81	0.230736	1.85215e-78	1	18575835	18576434	599	83	490	2.41033e-104	0.245416	1.22048e-101
1	17419918	17420517	599	99	388	3.99157e-50	0.407408	8.7135e-49	1	18613903	18614502	599	72	434	9.40051e-94	0.245754	3.02393e-91
1	17427124	17427723	599	38	342	1.19124e-77	0.202669	1.85179e-75	1	18628352	18628951	599	75	473	1.15758e-104	0.232799	5.93136e-102
1	17435453	17436052	599	49	289	1.10422e-52	0.300054	2.87994e-51	1	18634951	18635550	599	23	330	1.29843e-100	0.126192	5.66322e-98
1	17447408	17448007	599	6	217	8.12061e-70	0.0857967	7.21824e-68	1	18640074	18640673	599	58	363	2.18639e-80	0.245504	3.50274e-78
1	17454558	17455157	599	22	220	1.03269e-52	0.208168	2.69712e-51	1	18677577	18678176	599	98	436	1.21163e-76	0.32165	1.55735e-74
1	17464044	17464643	599	40	329	8.36503e-72	0.220368	8.57141e-70	1	18698370	18698969	599	51	301	9.41902e-65	0.267807	5.86853e-63
1	17483504	17484103	599	15	252	1.39595e-70	0.134748	1.31295e-68	1	18705636	18706235	599	73	374	3.4164e-73	0.290823	3.57448e-71
1	17486074	17486673	599	93	541	3.07663e-96	0.271991	1.39526e-93	1	18710079	18710678	599	69	393	2.99522e-82	0.262722	5.33344e-80
1	17490490	17491089	599	7	183	2.11335e-56	0.11307	7.14586e-55	1	18731950	18732549	599	26	274	1.54211e-76	0.169291	1.97046e-74
1	17506330	17506929	599	21	255	3.51583e-65	0.17154	2.23458e-63	1	18740360	18740959	599	31	269	5.49714e-70	0.198939	4.73817e-68
1	17515016	17515615	599	70	489	2.02842e-97	0.234979	9.68255e-95	1	18759393	18759992	599	40	286	3.1966e-68	0.230124	2.46907e-66
1	17515877	17516476	599	52	446	1.23974e-98	0.199896	6.2139e-96	1	18763069	18763668	599	63	356	2.61368e-74	0.269243	2.92646e-72
1	17526314	17526913	599	18	317	2.09917e-89	0.121033	6.7468e-87	1	18807941	18808540	599	46	399	5.33319e-103	0.182215	2.56457e-100
1	17535422	17536021	599	106	530	1.60867e-84	0.312521	3.91842e-82	1	18812636	18813235	599	45	406	1.9633e-106	0.175614	1.07353e-103
1	17567002	17567601	599	39	288	8.26337e-60	0.248361	3.56179e-58	1	18823045	18823644	599	38	424	8.49832e-120	0.145582	6.81274e-117
1	17573829	17574428	599	50	364	1.35142e-74	0.239263	1.69557e-72	1	18823646	18824245	599	83	418	1.21909e-80	0.289855	1.98219e-78
1	17584321	17584920	599	95	366	1.5086e-46	0.417479	2.58449e-45	1	18828363	18828962	599	98	453	5.76547e-82	0.309016	1.01142e-79
1	17588254	17588853	599	34	272	7.1776e-59	0.235499	2.89323e-57	1	18832808	18833407	599	103	496	2.34841e-92	0.293899	7.06893e-90
1	17612246	17612845	599	105	493	7.95247e-75	0.33419	1.01338e-72	1	18837870	18838469	599	32	285	7.99394e-75	0.192025	9.2291e-73
1	17637934	17638533	599	50	288	1.06696e-51	0.3064	2.59804e-50	1	18844613	18845212	599	62	302	2.18982e-57	0.315878	8.61822e-56
1	17646859	17647458	599	38	447	7.08436e-112	0.152962	5.31313e-109	1	18846585	18847184	599	78	401	1.55416e-78	0.286547	2.23565e-76
1	17669735	17670334	599	71	393	4.74217e-68	0.299166	3.71751e-66	1	18894069	18894668	599	69	433	1.07093e-95	0.237311	3.77135e-93
1	17676333	17676932	599	158	616	4.28215e-78	0.384328	6.85488e-76	1	18920931	18921530	599	45	314	7.50597e-74	0.230202	8.17625e-72
1	17686639	17687238	599	26	262	1.15163e-62	0.197154	6.09608e-61	1	18923025	18923624	599	107	551	2.30115e-107	0.27254	1.29847e-104
1	17716841	17717440	599	17	309	7.97673e-88	0.119107	2.3543e-85	1	18929439	18930038	599	62	428	1.65037e-99	0.21879	6.88296e-97
1	17721018	17721617	599	89	455	4.48971e-74	0.313382	5.41985e-72	1	18939939	18940538	599	128	481	9.14581e-73	0.369454	9.33733e-71
1	17763369	17763968	599	47	365	2.61193e-77	0.226314	3.96635e-75	1	18970866	18971465	599	134	746	2.52248e-152	0.243942	3.33619e-149
1	17769588	17770187	599	23	293	8.2432e-76	0.158912	1.12578e-73	1	18988987	18989586	599	40	382	1.96253e-102	0.169546	9.23173e-100
1	17781523	17782122	599	49	422	1.36841e-93	0.201329	5.46519e-91	1	19001798	19002397	599	45	314	7.50597e-74	0.230202	8.17625e-72
1	17782756	17783355	599	48	347	6.30466e-71	0.243012	6.077e-69	1	19005614	19006213	599	44	326	7.37479e-79	0.217093	1.08101e-76
1	17786243	17786842	599	101	474	5.53603e-72	0.336251	5.75751e-70	1	19006228	19006827	599	130	553	3.07584e-93	0.323919	9.66342e-91
1	17787053	17787652	599	34	382	2.40451e-94	0.164512	9.97526e-92	1	19012421	19013020	599	64	358	2.98962e-74	0.271358	3.33723e-72
1	17789592	17790191	599	82	386	4.27217e-59	0.346223	1.75063e-57	1	19026174	19026773	599	59	448	5.63313e-109	0.199774	3.35186e-106
1	17798669	17799268	599	20	242	7.27943e-62	0.17466	3.63385e-60	1	19047184	19047783	599	30	387	2.17926e-114	0.131915	1.5239e-111
1	17801684	17802283	599	50	446	2.28927e-100	0.193294	1.2284e-97	1	19103540	19104139	599	33	306	1.77641e-81	0.182648	3.03289e-79
1	17808697	17809296	599	16	341	4.18758e-100	0.102589	2.22441e-97	1	19105121	19105720	599	53	343	1.8916e-77	0.241118	2.5511e-75
1	17841458	17842057	599	44	283	1.8029e-54	0.280001	5.32454e-53	1	19109550	19110149	599	118	444	2.16246e-67	0.373124	1.5881e-65
1	17848160	17848759	599	94	570	4.30788e-104	0.260057	2.62763e-101	1	19139636	19140235	599	50	327	2.49491e-74	0.24123	2.79774e-72
1	17859811	17860410	599	16	269	2.94737e-75	0.131851	3.87395e-73	1	19149355	19149954	599	62	350	4.84639e-73	0.270317	5.03235e-71
1	17862422	17863021	599	81	361	7.58672e-53	0.367472	1.99845e-51	1	19153085	19153684	599	86	422	6.40198e-80	0.296177	9.98581e-78
1	17883829	17884428	599	41	388	9.47411e-90	0.189097	3.10202e-87	1	19155710	19156309	599	50	343	7.82739e-80	0.229373	1.21471e-77
1	17892626	17893225	599	6	231	8.33775e-75	0.0802559	1.06101e-72	1	19156460	19157059	599	24	313	4.19589e-93	0.137988	1.30901e-90
1	17908275	17908874	599	119	574	8.65927e-89	0.319292	2.69438e-86	1	19157262	19157861	599	153	752	3.7288e-141	0.273143	4.32939e-138
1	17916001	17916600	599	44	348	1.88705e-74	0.225035	2.33943e-72	1	19164637	19165236	599	44	270	1.44693e-59	0.265034	6.52552e-58
1	17920919	17921518	599	23	261	3.45969e-65	0.179655	2.2006e-63	1	19180891	19181490	599	35	364	1.0678e-100	0.159629	4.67564e-98
1	17923615	17924214	599	136	555	6.68416e-74	0.373419	7.97699e-72	1	19186240	19186839	599	111	456	6.05763e-75	0.34331	7.04108e-73
1	17936650	17937249	599	26	309	4.21295e-78	0.165522	6.74452e-76	1	19194616	19195215	599	47	315	1.38323e-72	0.238053	1.39512e-70
1	17937620	17938219	599	69	409	4.2603e-74	0.279781	5.15063e-72	1	19210842	19211441	599	12	270	7.74293e-91	0.0960465	2.16289e-88
1	17944630	17945229	599	76	434	1.34864e-76	0.28623	1.95019e-74	1	19225533	19226132	599	65	303	9.38864e-56	0.328009	3.33731e-54
1	17954977	17955576	599	39	347	2.25944e-78	0.203963	3.68648e-76	1	19261448	19262047	599	82	342	2.18219e-57	0.354137	8.58985e-56
1	17964299	17964898	599	30	292	1.01345e-68	0.197187	8.33485e-67	1	19294478	19295077	599	36	325	1.49995e-85	0.18413	3.20545e-83
1	17971308	17971907	599	22	295	1.62186e-77	0.152379	2.49971e-75	1	19302183	19302782	599	98	513	3.36196e-101	0.271327	1.50225e-98
1	17980600	17981199	599	49	331	2.92066e-65	0.259948	1.86726e-63	1	19339649	19340248	599	182	585	1.38621e-74	0.416069	1.57771e-72
1	17985769	17986368	599	37	328	4.71786e-74	0.207159	5.68862e-72	1	19373555	19374154	599	64	373	3.0486e-79	0.259883	4.57132e-77
1	18018171	18018770	599	52	316	1.4713e-58	0.287235	5.80605e-57	1	19416328	19416927	599	45	264	8.47941e-57	0.276645	3.21791e-55
1	18028847	18029446	599	50	335	1.00992e-65	0.261141	6.67842e-64	1	19436139	19436738	599	55	356	2.50582e-80	0.239356	3.99964e-78
1	18042772	18043371	599	94	370	4.29545e-48	0.408839	8.16513e-47	1	19454378	19454977	599	58	382	7.20963e-87	0.232673	1.65128e-84
1	18043508	18044107	599	56	378	2.95241e-74	0.253457	3.61423e-72	1	19463181	19463780	599	26	353	5.78399e-106	0.129511	3.10889e-103
1	18064732	18065331	599	39	353	2.72807e-80	0.200311	5.07266e-78	1	19487231	19487830	599	51	460	2.37675e-120	0.171395	1.92906e-117
1	18079781	18080380	599	22	355	7.90803e-98	0.125317	3.83951e-95	1	19489568	19490167	599	50	383	8.67916e-94	0.204223	2.79603e-91
1	18087667	18088266	599	88	458	1.44819e-75	0.308113	1.94484e-73	1	19490899	19491498	599	19	357	1.20988e-115	0.10018	8.74786e-113
1	18101344	18101943	599	36	415	2.84568e-103	0.158088	1.69249e-100	1	19491531	19492130	599	167	481	9.87055e-54	0.471392	3.0983e-52
1	18111082	18111681	599	92	478	1.09548e-78	0.306561	1.82697e-76	1	19530888	19531487	599	31	278	3.19355e-73	0.192111	3.35063e-71
1	18118517	18119116	599	38	320	1.19389e-70	0.217402	1.12772e-68	1	19569845	19570444	599	60	357	7.57008e-77	0.2573	9.85342e-75
1	18138670	18139269	599	10	265	3.01217e-81	0.0959326	5.96368e-79	1	19571423	19572022	599	43	350	3.4621e-88	0.19755	8.47467e-86
1	18182930	18183529	599	18	272	4.85065e-74	0.142336	5.84543e-72	1	19578328	19578927	599	33	281	1.76562e-72	0.1999	1.77061e-70
1	18198901	18199500	599	84	441	2.67188e-73	0.307563	3.05387e-71	1	19592974	19593573	599	6	152	9.83547e-53	0.11331	2.90443e-51
1	18200863	18201462	599	15	245	3.44802e-68	0.13885	2.73026e-66	1	19615731	19616330	599	135	543	2.97711e-87	0.341702	6.95144e-85
1	18204819	18205418	599	30	283	8.14494e-66	0.203838	5.41662e-64	1	19644795	19645394	599	121	472	5.34731e-74	0.358045	5.8806e-72
1	18217929	18218528	599	40	346	3.46634e-77	0.208962	5.22358e-75	1	19646166	19646765	599	51	331	6.50459e-75	0.242224	7.54826e-73
1	18218960	18219559	599	33	337	1.468e-80	0.183176	2.78178e-78	1	19652440	19653039	599	42	306	1.54444e-73	0.223187	1.65136e-71
1	18224087	18224686	599	70	387	5.55538e-67	0.300278	4.02918e-65	1	19661777	19662376	599	192	602	1.84982e-74	0.424353	2.08747e-72
1	18230784	18231383	599	17	288	1.28901e-80	0.128319	2.45065e-78	1	19668221	19668820	599	57	357	4.05933e-79	0.246121	6.03963e-77
1	18285869	18286468	599	87	391	1.62258e-57	0.360025	5.94051e-56	1	19678829	19679428	599	77	431	4.50707e-89	0.262642	1.15293e-86
1	18307336	18307935	599	12	295	3.83908e-89	0.0971027	1.21702e-86	1	19684317	19684916	599	24	234	7.5831e-64	0.187908	4.4643e-62
1	18313555	18314154	599	76	390	6.33826e-64	0.320215	3.67876e-62	1	19695859	19696458	599	46	296	7.31585e-67	0.249644	5.19709e-65
1	18332056	18332655	599	57	401	1.6466e-80	0.24187	3.10849e-78	1	19706334	19706933	599	74	403	5.70207e-82	0.272109	1.00072e-79
1	18342193	18342792	599	46	345	6.81929e-72	0.235809	7.0467e-70	1	19709020	19709619	599	79	408	4.01638e-80	0.284577	6.33687e-78
1	18345407	18346006	599	59	370	1.25442e-69	0.271193	1.10129e-67	1	19712949	19713548	599	59	332	3.09107e-69	0.273749	2.54556e-67
1	18367518	18368117	599	31	338	8.86482e-83	0.173503	1.93622e-80	1	19736882	19737481	599	65	359	7.27008e-74	0.274247	7.92927e-72
1	18368583	18369182	599	191	582	1.46472e-54	0.485763	4.34759e-53	1	19740046	19740645	599	46	421	6.42479e-111	0.172233	4.06307e-108
1	18373188	18373787	599	74	416	1.04116e-72	0.292275	1.13914e-70	1	19779020	19779619	599	65	420	2.2651e-94	0.232545	7.50102e-92
1	18376934	18377533	599	10	280	1.57925e-86	0.0904876	4.32657e-84	1	19792284	19792883	599	79	392	5.92571e-75	0.296789	6.8899e-73
1	18410185	18410784	599	16	316	1.96045e-91	0.111176	7.01032e-89	1	19796208	19796807	599	27	314	2.62489e-90	0.151032	7.13684e-88
1	18454756	18455355	599	29	351	4.89671e-89	0.157949	1.542e-86	1	19810316	19810915	599	48	279	1.32461e-59	0.275584	5.98789e-58
1	18456504	18457103	599	24	297	3.99702e-76	0.161983	5.5851e-74	1	19824432	19825031	599	64	369	6.60215e-78	0.262849	9.15181e-76
1	18472209	18472808	599	20	343	5.2535e-96	0.120694	2.35803e-93	1	19825553	19826152	599	20	261	6.6082e-78	0.145127	9.15927e-76
1	18476050	18476649	599	43	334	6.83684e-71	0.230477	6.57368e-69	1	19826183	19826782	599	100	350	8.8261e-50	0.412608	2.16817e-48
1	18481191	18481790	599	8	232	2.55611e-72	0.0954015	2.72386e-70	1	19827272	19827871	599	63	264	7.24649e-45	0.36939	1.31957e-43
1	18485083	18485682	599	60	458	9.63185e-96	0.219964	4.27341e-93	1	19840274	19840873	599	170	566	3.40259e-75	0.404332	4.01618e-73
1	18513254	18513853	599	57	334	2.27967e-60	0.293198	1.02387e-58	1	19845057	19845656	599	49	348	2.21991e-82	0.222036	3.98804e-80
1	18517122	18517721	599	30	379	2.41484e-97	0.149746	1.14858e-94	1	19849669	19850268	599	140	600	1.22454e-101	0.318352	5.57688e-99
1	18535605	18536204	599	89	529	1.71595e-95	0.26771	7.52349e-93	1	19858930	19859529	599	124	482	2.78439e-75	0.358159	3.30132e-73
1	18548905	18549504	599	14	311	3.604e-92	0.102514	1.34067e-89	1	19883802	19884401	599	92	396	6.12622e-68	0.336253	4.65205e-66
1	18553562	18554161	599	8	205	8.19154e-63	0.108889	4.3781e-61	1	19892531	19893130	599	91	449	2.97095e-85	0.291879	6.24846e-83
1	18557522	18558121	599	45	323	6.9242e-66	0.248122	4.63061e-64	1	19911474	19912073	599	12	239	8.34233e-79	0.109348	1.21854e-76
1	18576265	18576864	599	51	354	9.51342e-71	0.250596	9.04405e-69	1	19928752	19929351	599	69	414	2.82958e-89	0.248747	7.322e-87
1	18587570	18588169	599	24	288	3.922e-73	0.167349	4.42413e-71	1	19976075	19976674	599	30	269	6.70409e-71	0.193703	6.10881e-69
1	18628352	18628951	599	37	408	5.44703e-100	0.164636	2.88059e-97	1	19980814	19981413	599	58	410	1.56506e-96	0.216009	5.72408e-94
1	18634953	18635552	599	23	350	5.18065e-95	0.131705	2.22091e-92	1	19982000	19982599	599	76	441	3.98461e-93	0.25346	1.2438e-90
1	18677577	18678176	599	71	420	6.08283e-76	0.279008	8.39401e-74	1	19984188	19984787	599	137	481	5.75365e-68	0.39307	4.37821e-66
1	18690239	18690838	599	57	424	1.35162e-87	0.228119	3.9371e-85	1	19985767	19986366	599	145	564	7.86642e-88	0.350624	1.89069e-85
1	18698320	18698919	599	47	366	1.27262e-77	0.225663	1.97464e-75	1	19991049	19991648	599	45	304	2.1428e-70	0.238217	1.89104e-68
1	18705636	18706235	599	68	399	7.54517e-72	0.283498	7.77258e-70	1	20015404	20016003	599	61	287	2.89908e-53	0.328705	8.83958e-52
1	18710132	18710731	599	61	384	2.29195e-72	0.268458	2.44941e-70	1	20022784	20023383	599	16	245	2.61103e-76	0.131133	3.28906e-74
1	18715842	18716441	599	84	444	3.71198e-74	0.305386	4.51385e-72	1	20025456	20026055	599	49	517	5.01202e-143	0.146592	5.96579e-140
1	18730300	18730899	599	26	321	4.34753e-82	0.158989	9.08543e-80	1	20059565	20060164	599	32	262	1.36543e-66	0.20996	9.53451e-65
1	18739353	18739952	599	7	242	2.90809e-77	0.0838448	4.40311e-75	1	20078962	20079561	599	86	494	1.80696e-103	0.251143	8.85298e-101
1	18740395	18740994	599	18	278	4.44825e-76	0.139079	6.19049e-74	1	20084228	20084827	599	42	332	1.11718e-82	0.204763	2.04124e-80
1	18753660	18754259	599	65	380	2.411e-68	0.286868	1.93067e-66	1	20103484	20104083	599	53	357	2.9825e-82	0.231164	5.31242e-80
1	18759255	18759854	599	28	262	7.58069e-61	0.209218	3.51895e-59	1	20141610	20142209	599	13	262	1.90949e-86	0.104956	4.28139e-84
1	18763075	18763674	599	43	389	2.73144e-88	0.196296	8.26541e-86	1	20146976	20147575	599	52	329	1.87473e-73	0.247869	1.99448e-71
1	18807832	18808431	599	58	359	4.58268e-67	0.275834	3.33779e-65	1	20147861	20148460	599	19	238	2.33423e-70	0.153926	2.05651e-68
1	18812662	18813261	599	37	427	2.9867e-106	0.156959	1.94044e-103	1	20161899	20162498	599	365	734	2.1901e-42	0.630883	3.43119e-41
1	18823042	18823641	599	27	441	1.60952e-121	0.11732	1.42745e-118	1	20191603	20192202	599	20	279	1.10387e-84	0.135208	2.24993e-82
1	18823678	18824277	599	69	414	1.42158e-75	0.276236	1.91084e-73	1	20204096	20204695	599	50	473	5.47764e-126	0.163672	5.0197e-123
1	18828363	18828962	599	65	463	2.53702e-93	0.23317	9.99421e-91	1	20208909	20209508	599	92	454	3.42378e-86	0.291345	7.5722e-84
1	18832803	18833402	599	61	452	4.44246e-93	0.226246	1.73198e-90	1	20209516	20210115	599	100	455	2.51536e-81	0.313223	4.25336e-79
1	18837898	18838497	599	37	322	3.85216e-72	0.211237	4.04885e-70	1	20215045	20215644	599	186	621	1.40788e-82	0.398943	2.5555e-80
1	18844599	18845198	599	31	332	8.21996e-81	0.176813	1.58312e-78	1	20217161	20217760	599	270	790	6.43896e-89	0.439908	1.63579e-86
1	18869880	18870479	599	111	440	2.8603e-57	0.395783	1.02926e-55	1	20240779	20241378	599	70	404	3.49147e-85	0.258456	7.31792e-83
1	18886297	18886896	599	18	257	5.79378e-69	0.151176	4.85063e-67	1	20243586	20244185	599	25	330	2.10014e-98	0.134776	8.35109e-96
1	18894022	18894621	599	33	407	1.28548e-103	0.150181	7.72578e-101	1	20256266	20256865	599	38	301	3.51707e-75	0.208856	4.14697e-73
1	18923011	18923610	599	76	533	2.94827e-106	0.230883	1.91634e-103	1	20268011	20268610	599	25	246	2.9137e-67	0.184008	2.11921e-65
1	18943161	18943760	599	24	293	8.56285e-75	0.164326	1.0887e-72	1	20300792	20301391	599	60	447	8.89252e-108	0.203182	5.08293e-105
1	18970868	18971467	599	112	637	2.80101e-111	0.271194	2.07397e-108	1	20305669	20306268	599	97	414	1.88131e-70	0.336489	1.66905e-68
1	18988950	18989549	599	36	442	3.18704e-112	0.147978	2.41006e-109	1	20329744	20330343	599	25	258	1.19259e-71	0.174917	1.13599e-69
1	19005722	19006321	599	24	411	1.0837e-114	0.115019	8.59982e-112	1	20340407	20341006	599	76	386	4.87765e-75	0.291491	5.69829e-73
1	19012402	19013001	599	38	312	4.0191e-68	0.223297	3.16206e-66	1	20348888	20349487	599	21	312	4.72999e-96	0.124725	1.69348e-93
1	19025871	19026470	599	38	402	4.57169e-97	0.170968	2.14916e-94	1	20370666	20371265	599	30	286	4.7413e-77	0.181513	6.24815e-75
1	19026475	19027074	599	57	387	3.09469e-76	0.251072	4.36047e-74	1	20379853	20380452	599	61	293	3.60167e-55	0.321579	1.2348e-53
1	19047198	19047797	599	21	322	1.03498e-87	0.133967	3.03281e-85	1	20457824	20458423	599	86	390	8.80321e-70	0.321743	7.48577e-68
1	19079540	19080139	599	35	309	9.86063e-70	0.210714	8.72267e-68	1	20474811	20475410	599	61	371	8.26344e-81	0.25066	1.35741e-78
1	19100850	19101449	599	25	295	1.85848e-74	0.168503	2.30458e-72	1	20503712	20504311	599	87	342	1.7324e-54	0.373271	5.69061e-53
1	19103489	19104088	599	30	316	1.58812e-76	0.181379	2.28321e-74	1	20509873	20510472	599	73	370	6.73144e-72	0.294132	6.51518e-70
1	19105192	19105791	599	49	321	3.12237e-62	0.268506	1.60207e-60	1	20515134	20515733	599	54	398	1.14888e-95	0.209525	4.03639e-93
1	19121842	19122441	599	71	350	8.6523e-56	0.337962	2.80149e-54	1	20516354	20516953	599	56	350	1.64683e-77	0.247497	2.22722e-75
1	19139634	19140233	599	32	381	5.49064e-96	0.15696	2.46083e-93	1	20521317	20521916	599	34	295	1.36341e-76	0.194579	1.74633e-74
1	19149422	19150021	599	51	341	8.62378e-67	0.260676	6.16204e-65	1	20524476	20525075	599	93	368	7.58871e-59	0.366734	3.26748e-57
1	19153086	19153685	599	75	376	1.33854e-60	0.328896	6.11284e-59	1	20563394	20563993	599	20	226	7.49543e-65	0.169179	4.70304e-63
1	19155706	19156305	599	43	326	2.12421e-68	0.236451	1.70693e-66	1	20566184	20566783	599	112	449	2.99687e-72	0.351757	2.9623e-70
1	19156370	19156969	599	42	335	5.02627e-72	0.225243	5.24259e-70	1	20573308	20573907	599	106	504	6.07858e-93	0.296596	1.88195e-90
1	19156971	19157570	599	74	494	6.70774e-96	0.244139	2.99566e-93	1	20595094	20595693	599	120	572	1.96824e-105	0.290765	1.0376e-102
1	19180905	19181504	599	33	347	8.0391e-84	0.177614	1.8746e-81	1	20604327	20604926	599	54	321	3.12151e-69	0.26278	2.56994e-67
1	19186244	19186843	599	88	470	5.38612e-79	0.299885	9.17529e-77	1	20612693	20613292	599	34	319	3.0182e-85	0.179131	6.34506e-83
1	19210508	19211107	599	36	310	3.46584e-69	0.214946	2.94746e-67	1	20614194	20614793	599	20	272	4.81958e-82	0.138902	8.4976e-80
1	19293057	19293656	599	11	261	1.54871e-78	0.104062	2.55611e-76	1	20637031	20637630	599	37	251	1.56293e-58	0.247696	6.59683e-57
1	19294502	19295101	599	40	356	2.2591e-80	0.202781	4.2205e-78	1	20648164	20648763	599	80	556	3.49983e-129	0.208178	3.39515e-126
1	19302084	19302683	599	71	383	3.65814e-65	0.307382	2.32072e-63	1	20672449	20673048	599	40	274	4.63475e-64	0.240826	2.76661e-62
1	19374547	19375146	599	62	364	1.01169e-65	0.288041	6.68884e-64	1	20673078	20673677	599	22	307	4.90495e-93	0.131546	1.52562e-90
1	19416328	19416927	599	40	284	8.59722e-58	0.257463	3.20799e-56	1	20676046	20676645	599	56	343	3.86365e-75	0.252825	4.54281e-73
1	19424427	19425026	599	63	387	8.03028e-72	0.273849	8.24905e-70	1	20680349	20680948	599	53	334	2.20842e-74	0.247976	2.48231e-72
1	19425362	19425961	599	34	366	4.34337e-89	0.172087	1.37331e-86	1	20708741	20709340	599	60	344	1.68764e-72	0.267557	1.69445e-70
1	19436070	19436669	599	24	344	6.84846e-92	0.138697	2.508e-89	1	20712620	20713219	599	86	420	2.79615e-79	0.297657	4.2021e-77
1	19454377	19454976	599	36	381	4.27293e-92	0.17294	1.58297e-89	1	20725410	20726009	599	29	402	4.00108e-121	0.123315	3.32298e-118
1	19463170	19463769	599	20	358	3.73605e-101	0.115371	2.06371e-98	1	20745323	20745922	599	66	410	3.39248e-90	0.241703	9.18305e-88
1	19487351	19487950	599	68	405	1.28665e-73	0.279089	1.50454e-71	1	20760531	20761130	599	38	264	3.21787e-62	0.240016	1.71191e-60
1	19490786	19491385	599	32	347	8.99072e-85	0.173193	2.22439e-82	1	20769020	20769619	599	56	398	5.26178e-94	0.216196	1.71336e-91
1	19491509	19492108	599	111	450	7.19012e-60	0.386574	3.11184e-58	1	20772326	20772925	599	19	246	2.35081e-73	0.1486	2.48666e-71
1	19497173	19497772	599	43	357	4.09151e-78	0.214851	6.55815e-76	1	20791091	20791690	599	58	364	1.00052e-80	0.244794	1.63628e-78
1	19508538	19509137	599	47	398	1.08815e-87	0.206625	3.18403e-85	1	20845392	20845991	599	78	371	6.65607e-69	0.310954	5.36909e-67
1	19530841	19531440	599	39	330	5.76601e-73	0.215061	6.43215e-71	1	20867464	20868063	599	68	420	4.68873e-92	0.241905	1.39068e-89
1	19578480	19579079	599	25	360	3.23001e-96	0.136551	1.46351e-93	1	20870225	20870824	599	72	447	3.82066e-98	0.23827	1.50142e-95
1	19587040	19587639	599	31	307	1.15533e-72	0.192059	1.26141e-70	1	20905700	20906299	599	62	415	5.02032e-95	0.225985	1.71285e-92
1	19591480	19592079	599	155	533	7.68851e-59	0.43907	3.09178e-57	1	20906970	20907569	599	232	740	5.39591e-93	0.408413	1.67417e-90
1	19615731	19616330	599	122	517	1.57878e-71	0.364227	1.58958e-69	1	20918162	20918761	599	93	442	1.05159e-81	0.302546	1.81881e-79
1	19641408	19642007	599	28	314	8.71826e-78	0.172694	1.36693e-75	1	20926327	20926926	599	31	386	6.07083e-113	0.13585	4.07335e-110
1	19644792	19645391	599	107	498	5.22523e-75	0.336355	6.74306e-73	1	20930247	20930846	599	59	358	6.20035e-78	0.252831	8.6091e-76
1	19646173	19646772	599	33	323	5.14811e-76	0.191566	7.13659e-74	1	20941997	20942596	599	27	269	9.94472e-74	0.177921	1.07557e-71
1	19652556	19653155	599	31	338	8.86482e-83	0.173503	1.93622e-80	1	20949923	20950522	599	26	302	6.96296e-87	0.152707	1.59574e-84
1	19653164	19653763	599	35	329	3.84793e-76	0.197205	5.38985e-74	1	20953299	20953898	599	34	271	4.92378e-68	0.212895	3.76239e-66
1	19668693	19669292	599	40	404	7.66112e-96	0.177524	3.41378e-93	1	20977380	20977979	599	91	418	2.08733e-75	0.314611	2.49308e-73
1	19695859	19696458	599	36	302	1.19135e-66	0.220973	8.42654e-65	1	20983979	20984578	599	40	297	4.60714e-72	0.221107	4.5072e-70
1	19706319	19706918	599	61	406	5.45715e-79	0.253196	9.28861e-77	1	20994527	20995126	599	108	450	6.87242e-75	0.339599	7.96487e-73
1	19709022	19709621	599	49	358	1.56351e-73	0.239322	1.81818e-71	1	21000955	21001554	599	153	550	2.29149e-79	0.378102	3.45857e-77
1	19713112	19713711	599	41	349	2.78768e-77	0.211401	4.22565e-75	1	21013971	21014570	599	8	189	1.57418e-64	0.106982	9.68663e-63
1	19740032	19740631	599	33	369	4.88875e-91	0.166479	1.71141e-88	1	21016291	21016890	599	57	487	1.44687e-124	0.177681	1.28898e-121
1	19798333	19798932	599	46	308	1.54666e-60	0.265816	7.01618e-59	1	21018553	21019152	599	37	340	4.88577e-90	0.179604	1.31138e-87
1	19810340	19810939	599	31	298	9.43989e-70	0.198201	8.35949e-68	1	21019724	21020323	599	40	357	2.16115e-93	0.182063	6.83481e-91
1	19824433	19825032	599	50	381	7.31122e-80	0.228043	1.32088e-77	1	21070616	21071215	599	54	356	4.10067e-81	0.235604	6.85814e-79
1	19826167	19826766	599	66	316	2.26066e-49	0.353109	4.68655e-48	1	21086327	21086926	599	139	522	9.19494e-79	0.365682	1.33997e-76
1	19827268	19827867	599	38	283	4.68435e-59	0.247591	1.91484e-57	1	21138157	21138756	599	26	271	1.94985e-75	0.17128	2.33405e-73
1	19828979	19829578	599	50	300	3.12901e-55	0.293437	9.74273e-54	1	21142252	21142851	599	43	342	2.38502e-85	0.202424	5.037e-83
1	19840271	19840870	599	110	496	1.07074e-72	0.346307	1.17093e-70	1	21145958	21146557	599	65	320	3.64303e-61	0.309615	1.81539e-59
1	19845078	19845677	599	39	349	5.19001e-79	0.202731	8.84741e-77	1	21166971	21167570	599	43	337	1.40028e-83	0.205593	2.6886e-81
1	19849518	19850117	599	48	470	7.10438e-110	0.176709	5.08547e-107	1	21191987	21192586	599	90	377	2.58399e-63	0.347206	1.47356e-61
1	19858897	19859496	599	71	402	1.14938e-70	0.292134	1.08773e-68	1	21195234	21195833	599	33	300	2.61928e-79	0.186515	3.94322e-77
1	19864497	19865096	599	25	308	8.96768e-79	0.160987	1.50351e-76	1	21203403	21204002	599	56	471	9.56566e-120	0.181208	7.6587e-117
1	19876771	19877370	599	27	267	2.28806e-63	0.199155	1.27431e-61	1	21205316	21205915	599	33	316	4.19856e-85	0.176543	8.75893e-83
1	19878012	19878611	599	20	250	1.58461e-64	0.168716	9.59412e-63	1	21213814	21214413	599	67	365	2.0204e-74	0.276737	2.27409e-72
1	19883517	19884116	599	33	344	7.67245e-83	0.179247	1.68264e-80	1	21243959	21244558	599	71	343	1.46422e-64	0.310881	9.02338e-63
1	19890211	19890810	599	17	269	3.96941e-74	0.137952	4.80857e-72	1	21248761	21249360	599	128	533	2.5503e-88	0.331888	6.28813e-86
1	19911462	19912061	599	8	284	9.46625e-91	0.0769437	3.26812e-88	1	21257653	21258252	599	39	399	1.34214e-109	0.15857	8.14231e-107
1	19928742	19929341	599	68	418	1.80519e-77	0.269986	2.77034e-75	1	21266824	21267423	599	19	218	6.58591e-63	0.169043	3.65679e-61
1	19976073	19976672	599	22	249	3.32181e-62	0.18242	1.6987e-60	1	21308865	21309464	599	60	332	1.61536e-68	0.277768	1.27099e-66
1	19980834	19981433	599	44	380	1.50558e-84	0.205129	3.67512e-82	1	21345949	21346548	599	146	546	5.75567e-82	0.364973	1.00982e-79
1	19982186	19982785	599	51	396	1.00144e-83	0.222715	2.31929e-81	1	21350665	21351264	599	157	573	6.95691e-84	0.37099	1.35837e-81
1	19991051	19991650	599	35	292	2.46553e-64	0.223718	1.47216e-62	1	21356181	21356780	599	37	412	2.23716e-116	0.146742	1.6494e-113
1	20015423	20016022	599	45	278	3.00332e-52	0.29082	7.5918e-51	1	21380308	21380907	599	46	388	4.61648e-99	0.187646	1.88784e-96
1	20022757	20023356	599	12	258	3.17078e-76	0.111938	4.46542e-74	1	21393534	21394133	599	97	397	2.88201e-65	0.351634	1.85543e-63
1	20025457	20026056	599	46	492	6.60564e-119	0.162469	5.66699e-116	1	21394654	21395253	599	119	529	1.51503e-92	0.313065	4.59935e-90
1	20078962	20079561	599	91	440	1.29409e-68	0.331084	1.05653e-66	1	21413749	21414348	599	27	282	1.72756e-78	0.169232	2.47724e-76
1	20079571	20080170	599	79	426	2.89421e-72	0.30203	3.07169e-70	1	21429589	21430188	599	45	317	6.83666e-75	0.227901	7.92431e-73
1	20092284	20092883	599	33	338	6.93626e-81	0.182605	1.34278e-78	1	21430721	21431320	599	119	507	9.53411e-86	0.327262	2.05987e-83
1	20103574	20104173	599	68	405	1.28665e-73	0.279089	1.50454e-71	1	21437220	21437819	599	34	315	8.47895e-84	0.181535	1.64681e-81
1	20141716	20142315	599	50	382	3.57112e-80	0.227416	6.58851e-78	1	21456156	21456755	599	46	352	2.71268e-86	0.207895	6.02699e-84
1	20144613	20145212	599	45	367	1.37612e-79	0.216865	2.43937e-77	1	21459244	21459843	599	61	353	9.08392e-75	0.264136	1.04306e-72
1	20146965	20147564	599	45	321	2.85303e-65	0.249755	1.82569e-63	1	21493301	21493900	599	78	418	4.44637e-84	0.274327	8.76596e-82
1	20147859	20148458	599	25	280	1.67341e-69	0.178084	1.45559e-67	1	21500339	21500938	599	72	378	3.51781e-75	0.284117	4.14717e-73
1	20149560	20150159	599	30	307	1.37121e-73	0.187005	1.60026e-71	1	21506662	21507261	599	76	433	1.84657e-90	0.25837	5.06316e-88
1	20162088	20162687	599	211	692	2.07543e-71	0.445065	2.07114e-69	1	21512147	21512746	599	51	325	7.25992e-73	0.246947	7.45081e-71
1	20191579	20192178	599	27	292	1.6091e-71	0.18112	1.61918e-69	1	21522371	21522970	599	93	355	5.55376e-55	0.380889	1.88126e-53
1	20199019	20199618	599	127	494	7.72558e-63	0.396163	4.13885e-61	1	21530259	21530858	599	125	516	6.37425e-85	0.335981	1.31689e-82
1	20204152	20204751	599	24	400	6.30833e-111	0.118343	4.63005e-108	1	21544115	21544714	599	31	393	1.46086e-115	0.133308	1.05406e-112
1	20208696	20209295	599	54	419	1.85048e-88	0.220453	5.65427e-86	1	21547853	21548452	599	25	310	6.56118e-91	0.143978	1.83853e-88
1	20209340	20209939	599	58	384	1.42179e-74	0.25697	1.78172e-72	1	21554485	21555084	599	29	284	2.82147e-77	0.177914	3.76508e-75
1	20240795	20241394	599	51	402	1.334e-85	0.219225	3.46691e-83	1	21557929	21558528	599	54	377	2.35909e-88	0.22181	5.82409e-86
1	20243550	20244149	599	34	330	2.28623e-77	0.191931	3.48392e-75	1	21565530	21566129	599	51	307	9.07824e-67	0.262273	6.41468e-65
1	20256390	20256989	599	44	355	1.20107e-76	0.220362	1.74249e-74	1	21568506	21569105	599	132	490	3.22952e-73	0.372664	3.38703e-71
1	20261997	20262596	599	32	300	1.7009e-69	0.20197	1.47847e-67	1	21581640	21582239	599	15	218	3.39111e-67	0.141617	2.45898e-65
1	20268193	20268792	599	18	272	4.85065e-74	0.142336	5.84543e-72	1	21589196	21589795	599	177	570	7.01759e-73	0.416611	7.20954e-71
1	20275236	20275835	599	133	540	1.36799e-71	0.3765	1.38346e-69	1	21611898	21612497	599	32	286	3.48883e-75	0.191314	4.11449e-73
1	20300808	20301407	599	44	404	3.2689e-92	0.192344	1.21765e-89	1	21641849	21642448	599	54	305	6.87226e-64	0.277373	4.06088e-62
1	20340388	20340987	599	26	296	8.39497e-74	0.173223	9.94445e-72	1	21649513	21650112	599	89	299	5.78031e-41	0.439005	8.30719e-40
1	20344278	20344877	599	69	348	1.78023e-56	0.331587	6.0515e-55	1	21657073	21657672	599	99	406	8.01454e-67	0.349799	5.68193e-65
1	20348872	20349471	599	23	369	1.78027e-101	0.124573	9.9486e-99	1	21660948	21661547	599	55	346	6.40305e-77	0.246651	8.36325e-75
1	20350741	20351340	599	39	333	6.45406e-74	0.213017	7.71544e-72	1	21690049	21690648	599	82	394	1.30498e-73	0.30512	1.40201e-71
1	20370673	20371272	599	39	336	7.20159e-75	0.211011	9.21178e-73	1	21693791	21694390	599	36	335	3.65281e-89	0.178333	9.39509e-87
1	20379853	20380452	599	49	298	2.40627e-55	0.290467	7.55775e-54	1	21710653	21711252	599	75	430	3.43406e-90	0.257236	9.28903e-88
1	20391223	20391822	599	59	382	3.15045e-73	0.262239	3.5832e-71	1	21711287	21711886	599	61	438	8.47886e-104	0.210559	4.20527e-101
1	20408559	20409158	599	22	316	1.37539e-84	0.141688	3.36312e-82	1	21713130	21713729	599	28	311	3.57539e-88	0.157095	8.73846e-86
1	20455919	20456518	599	13	327	4.74508e-99	0.0921718	2.42145e-96	1	21728495	21729094	599	34	293	7.10718e-76	0.195986	8.72958e-74
1	20474818	20475417	599	54	401	7.29769e-83	0.230852	1.60327e-80	1	21731769	21732368	599	29	317	2.22449e-89	0.158375	5.77916e-87
1	20497649	20498248	599	53	295	1.05605e-51	0.313999	2.57225e-50	1	21732687	21733286	599	67	379	4.75374e-79	0.265991	7.04531e-77
1	20503649	20504248	599	71	394	2.43301e-68	0.298368	1.94778e-66	1	21742648	21743247	599	44	338	4.50089e-83	0.208968	8.40252e-81
1	20506062	20506661	599	19	283	1.12292e-76	0.1422	1.63145e-74	1	21862493	21863092	599	133	502	3.47506e-76	0.365869	4.34901e-74
1	20515132	20515731	599	38	417	5.5492e-102	0.164519	3.15887e-99	1	21883569	21884168	599	103	531	1.29861e-103	0.2737	6.39666e-101
1	20521274	20521873	599	22	272	7.93659e-70	0.166072	7.06655e-68	1	21890701	21891300	599	156	627	2.1395e-100	0.335814	9.25043e-98
1	20524622	20525221	599	67	337	1.24567e-54	0.334285	3.72131e-53	1	21892457	21893056	599	28	278	4.75376e-76	0.176908	5.89845e-74
1	20535748	20536347	599	120	492	5.06555e-66	0.37787	3.42353e-64	1	21905842	21906441	599	99	378	1.91565e-58	0.377077	8.05024e-57
1	20563394	20563993	599	15	200	6.00528e-53	0.172463	1.59455e-51	1	21916228	21916827	599	54	280	1.13316e-55	0.303669	4.0058e-54
1	20566217	20566816	599	56	373	9.70617e-73	0.257032	1.06454e-70	1	21924159	21924758	599	70	341	1.40094e-64	0.308932	8.64785e-63
1	20573283	20573882	599	104	483	1.13736e-72	0.338497	1.24247e-70	1	21955359	21955958	599	49	328	1.83026e-75	0.236341	2.19428e-73
1	20577022	20577621	599	12	262	1.28638e-77	0.110123	1.99407e-75	1	21973371	21973970	599	34	274	4.25083e-69	0.210422	3.46866e-67
1	20595118	20595717	599	91	537	1.8828e-96	0.26883	8.61896e-94	1	21984108	21984707	599	73	456	1.98168e-100	0.236197	8.57701e-98
1	20604536	20605135	599	40	329	8.36503e-72	0.220368	8.57141e-70	1	21997961	21998560	599	47	338	1.50362e-80	0.220983	2.43412e-78
1	20612690	20613289	599	30	321	3.67353e-78	0.178395	5.91429e-76	1	22007630	22008229	599	29	252	1.06001e-65	0.201995	7.00517e-64
1	20621268	20621867	599	23	321	3.33258e-85	0.14429	8.45927e-83	1	22009245	22009844	599	123	466	4.16324e-71	0.368313	3.84454e-69
1	20629772	20630371	599	35	337	1.01336e-78	0.192268	1.69352e-76	1	22056979	22057578	599	113	458	2.21098e-74	0.347302	2.48497e-72
1	20648167	20648766	599	43	577	4.10653e-150	0.12995	4.69408e-147	1	22057739	22058338	599	33	280	4.02326e-72	0.200657	3.94836e-70
1	20673151	20673750	599	48	299	2.33813e-56	0.284395	7.88393e-55	1	22064961	22065560	599	35	291	2.90524e-74	0.202189	3.24417e-72
1	20676047	20676646	599	30	357	5.01508e-90	0.159474	1.66491e-87	1	22070972	22071571	599	87	416	2.3932e-77	0.303771	3.20956e-75
1	20708743	20709342	599	51	320	1.81899e-60	0.278764	8.22213e-59	1	22072196	22072795	599	89	460	3.72242e-90	0.278986	1.00568e-87
1	20712552	20713151	599	68	420	4.58357e-78	0.268637	7.31895e-76	1	22076261	22076860	599	18	245	4.57511e-74	0.143237	5.04747e-72
1	20715197	20715796	599	41	379	7.43353e-87	0.193821	2.07647e-84	1	22078948	22079547	599	51	265	7.47532e-53	0.306528	2.22152e-51
1	20718630	20719229	599	52	269	6.9305e-45	0.340651	1.06481e-43	1	22093260	22093859	599	27	370	2.86988e-111	0.127029	1.83379e-108
1	20725410	20726009	599	30	425	8.85619e-113	0.132773	6.77468e-110	1	22105687	22106286	599	52	262	3.36015e-51	0.315464	9.01992e-50
1	20743797	20744396	599	199	629	6.17554e-62	0.465431	3.1035e-60	1	22113526	22114125	599	34	308	2.86855e-81	0.1859	4.83808e-79
1	20745277	20745876	599	49	370	3.00783e-77	0.231157	4.54882e-75	1	22118722	22119321	599	91	384	7.39926e-65	0.34393	4.64517e-63
1	20760499	20761098	599	40	292	2.96082e-60	0.249996	1.31786e-58	1	22176190	22176789	599	67	491	2.69343e-117	0.20276	2.03275e-114
1	20769079	20769678	599	87	518	1.19763e-93	0.268159	4.79631e-91	1	22215024	22215623	599	73	410	5.36285e-85	0.26405	1.11203e-82
1	20791090	20791689	599	47	381	2.52966e-82	0.216326	5.36225e-80	1	22229286	22229885	599	177	567	4.64868e-72	0.418908	4.547e-70
1	20804382	20804981	599	95	489	6.84527e-80	0.308073	1.23815e-77	1	22238966	22239565	599	65	365	7.52357e-76	0.269503	9.23038e-74
1	20867475	20868074	599	48	386	4.60877e-83	0.217238	1.02381e-80	1	22240844	22241443	599	45	394	4.08381e-102	0.181236	1.89613e-99
1	20906971	20907570	599	154	657	5.61689e-91	0.351054	1.95949e-88	1	22261478	22262077	599	60	370	3.13775e-81	0.247791	5.27808e-79
1	20918169	20918768	599	84	404	7.14244e-63	0.337173	3.8407e-61	1	22265857	22266456	599	94	516	5.46436e-105	0.259795	2.8341e-102
1	20926422	20927021	599	40	408	3.8308e-97	0.175697	1.80637e-94	1	22278437	22279036	599	103	477	2.46035e-86	0.306149	5.48514e-84
1	20930247	20930846	599	53	336	8.34433e-64	0.273651	4.79507e-62	1	22285314	22285913	599	169	608	1.30485e-87	0.373253	3.10455e-85
1	20949856	20950455	599	38	348	1.42728e-79	0.198987	2.52696e-77	1	22293729	22294328	599	37	318	4.03776e-82	0.192745	7.14716e-80
1	20953422	20954021	599	18	296	3.26815e-82	0.130133	6.88561e-80	1	22313101	22313700	599	53	374	3.94704e-88	0.220116	9.63064e-86
1	20963273	20963872	599	17	276	1.63014e-76	0.134241	2.34236e-74	1	22340303	22340902	599	223	630	5.66288e-68	0.46519	4.31137e-66
1	20967414	20968013	599	36	335	3.54705e-77	0.198041	5.33861e-75	1	22341989	22342588	599	130	520	3.20385e-83	0.345394	6.03174e-81
1	20983976	20984575	599	31	305	5.13913e-72	0.193391	5.35354e-70	1	22347340	22347939	599	49	329	8.28881e-76	0.235582	1.01422e-73
1	20994497	20995096	599	53	463	3.56326e-103	0.195386	2.11255e-100	1	22349030	22349629	599	147	522	1.77094e-74	0.384899	2.00325e-72
1	21007793	21008392	599	91	508	5.70184e-88	0.28487	1.6941e-85	1	22357722	22358321	599	20	270	2.73078e-81	0.139995	4.60855e-79
1	21013970	21014569	599	11	182	3.47962e-51	0.152983	8.17318e-50	1	22361687	22362286	599	39	296	1.47616e-72	0.217249	1.48701e-70
1	21015944	21016543	599	73	515	4.60428e-103	0.230965	2.72033e-100	1	22386512	22387111	599	38	256	1.86469e-59	0.247995	8.34121e-58
1	21018784	21019383	599	35	388	2.38316e-95	0.165754	1.03697e-92	1	22394355	22394954	599	49	419	1.89391e-107	0.182656	1.07108e-104
1	21019735	21020334	599	39	372	2.1402e-86	0.189554	5.81449e-84	1	22419415	22420014	599	25	216	2.07171e-56	0.211393	7.67402e-55
1	21068186	21068785	599	5	202	6.09171e-66	0.0834077	4.09565e-64	1	22427717	22428316	599	54	365	3.30627e-84	0.22949	6.56816e-82
1	21070544	21071143	599	34	311	3.00072e-71	0.204339	2.96062e-69	1	22444875	22445474	599	59	462	6.56637e-114	0.19344	4.52809e-111
1	21086357	21086956	599	94	481	2.92694e-78	0.310477	4.74152e-76	1	22479306	22479905	599	160	466	6.80441e-53	0.468437	2.02715e-51
1	21086967	21087566	599	61	359	6.04221e-65	0.288164	3.77592e-63	1	22488129	22488728	599	31	273	2.01262e-71	0.195846	1.89326e-69
1	21123290	21123889	599	13	292	8.24327e-87	0.103893	2.29779e-84	1	22498559	22499158	599	46	247	1.92874e-50	0.302519	4.93817e-49
1	21138264	21138863	599	62	394	1.2371e-74	0.265021	1.55501e-72	1	22502188	22502787	599	87	366	9.67387e-62	0.347529	4.99566e-60
1	21142294	21142893	599	25	391	9.95763e-107	0.125186	6.56486e-104	1	22507894	22508493	599	26	240	3.88899e-64	0.194899	2.33098e-62
1	21145962	21146561	599	34	304	5.22195e-69	0.209318	4.3858e-67	1	22518746	22519345	599	51	276	1.88789e-56	0.293576	7.01279e-55
1	21166959	21167558	599	27	398	6.71431e-107	0.130652	4.4431e-104	1	22541344	22541943	599	26	270	4.53934e-75	0.171954	5.30972e-73
1	21178713	21179312	599	48	311	5.8954e-60	0.2728	2.57016e-58	1	22544339	22544938	599	103	510	7.81221e-97	0.285476	2.89709e-94
1	21192016	21192615	599	71	338	1.90982e-52	0.350625	4.89453e-51	1	22548633	22549232	599	25	313	4.96017e-92	0.14252	1.46928e-89
1	21203540	21204139	599	51	443	1.53247e-98	0.197992	7.6585e-96	1	22554402	22555001	599	43	359	2.16202e-91	0.192336	6.2034e-89
1	21205233	21205832	599	51	311	8.74858e-58	0.287297	3.26301e-56	1	22560458	22561057	599	64	394	2.64087e-86	0.24534	5.87118e-84
1	21244074	21244673	599	44	336	1.05369e-70	0.233518	9.99356e-69	1	22575295	22575894	599	21	301	6.96352e-92	0.129551	2.04593e-89
1	21248761	21249360	599	83	539	8.60528e-103	0.246719	5.03795e-100	1	22575934	22576533	599	80	469	1.55212e-99	0.248667	6.48031e-97
1	21257668	21258267	599	33	408	5.97342e-104	0.149795	3.62635e-101	1	22597989	22598588	599	78	400	3.27906e-78	0.2873	4.62516e-76
1	21266829	21267428	599	23	266	7.72956e-67	0.176069	5.53743e-65	1	22602968	22603567	599	144	520	1.74505e-75	0.379214	2.09442e-73
1	21341220	21341819	599	30	286	8.78894e-67	0.201572	6.27231e-65	1	22628751	22629350	599	32	352	2.83756e-99	0.153624	1.17142e-96
1	21353327	21353926	599	48	352	1.80805e-72	0.239376	1.94535e-70	1	22658245	22658844	599	94	476	6.2306e-92	0.282653	1.83613e-89
1	21356183	21356782	599	40	432	5.54032e-105	0.165472	3.47066e-102	1	22663477	22664076	599	19	260	1.27677e-78	0.140104	1.84736e-76
1	21358833	21359432	599	17	289	5.8592e-81	0.127848	1.13843e-78	1	22673881	22674480	599	118	618	1.40097e-121	0.264211	1.17504e-118
1	21360885	21361484	599	28	342	4.71893e-87	0.157803	1.33141e-84	1	22680690	22681289	599	81	527	2.10462e-118	0.222578	1.6331e-115
1	21380308	21380907	599	45	408	1.31002e-92	0.194018	4.9811e-90	1	22689160	22689759	599	221	659	2.29051e-76	0.440218	2.8966e-74
1	21394713	21395312	599	81	494	8.77994e-91	0.264445	3.03742e-88	1	22695904	22696503	599	131	625	4.15782e-115	0.287157	2.96333e-112
1	21430721	21431320	599	72	453	4.96659e-85	0.260932	1.2462e-82	1	22714319	22714918	599	57	396	1.70907e-92	0.22069	5.177e-90
1	21441263	21441862	599	18	274	1.01626e-74	0.141234	1.285e-72	1	22718179	22718778	599	55	365	2.07124e-83	0.233145	3.9398e-81
1	21463709	21464308	599	53	393	3.49903e-81	0.232032	6.90728e-79	1	22720394	22720993	599	37	300	1.0653e-75	0.204995	1.29358e-73
1	21493305	21493904	599	47	513	7.83299e-125	0.158394	7.22514e-122	1	22752328	22752927	599	26	324	4.42222e-95	0.141768	1.51314e-92
1	21506663	21507262	599	67	479	1.11588e-96	0.231068	5.15897e-94	1	22761232	22761831	599	18	257	1.34851e-78	0.136132	1.94834e-76
1	21509694	21510293	599	20	306	2.21366e-83	0.136156	5.01811e-81	1	22792949	22793548	599	19	235	3.08776e-69	0.156022	2.54326e-67
1	21511345	21511944	599	48	353	8.87599e-73	0.238661	9.76652e-71	1	22795952	22796551	599	51	435	2.26723e-111	0.181727	1.45316e-108
1	21517308	21517907	599	45	392	1.67674e-87	0.202344	4.85794e-85	1	22797854	22798453	599	62	370	1.01215e-79	0.254952	1.55936e-77
1	21530380	21530979	599	38	342	1.19124e-77	0.202669	1.85179e-75	1	22807037	22807636	599	89	480	1.09677e-96	0.266835	4.04261e-94
1	21544114	21544713	599	36	430	3.08405e-108	0.152309	2.11729e-105	1	22812384	22812983	599	46	516	1.12119e-145	0.1392	1.38393e-142
1	21554456	21555055	599	17	281	3.19658e-78	0.131709	5.16529e-76	1	22815998	22816597	599	69	497	1.00453e-117	0.205428	7.66474e-115
1	21557927	21558526	599	57	393	4.59933e-78	0.247045	7.34224e-76	1	22818707	22819306	599	23	174	3.06695e-43	0.249621	5.05495e-42
1	21565543	21566142	599	46	294	2.60024e-56	0.279229	8.74666e-55	1	22842123	22842722	599	30	226	1.36774e-55	0.233165	4.8153e-54
1	21581629	21582228	599	3	224	4.51015e-77	0.0575623	6.73455e-75	1	22918426	22919025	599	184	516	1.94646e-55	0.479064	6.78458e-54
1	21598866	21599465	599	43	372	7.23017e-83	0.205741	1.58882e-80	1	22923826	22924425	599	35	300	1.76722e-77	0.195772	2.38709e-75
1	21623517	21624116	599	62	408	7.56187e-79	0.255479	1.27527e-76	1	22931363	22931962	599	69	321	7.09366e-59	0.32515	3.06241e-57
1	21641849	21642448	599	48	362	1.44515e-75	0.232416	1.94098e-73	1	22944246	22944845	599	90	438	2.15014e-82	0.296623	3.8661e-80
1	21643584	21644183	599	21	240	3.26959e-60	0.182975	1.45005e-58	1	22956481	22957080	599	59	407	1.12024e-94	0.220927	3.76043e-92
1	21657064	21657663	599	68	396	5.74517e-71	0.285754	5.55621e-69	1	22959530	22960129	599	62	352	1.04995e-73	0.268699	1.13404e-71
1	21661173	21661772	599	11	254	4.32518e-76	0.107113	6.02629e-74	1	22961787	22962386	599	164	534	2.82655e-69	0.415633	2.33471e-67
1	21693757	21694356	599	52	381	2.89291e-78	0.235832	4.68707e-76	1	22980382	22980981	599	54	353	4.37279e-80	0.237714	6.88136e-78
1	21710658	21711257	599	54	399	3.03481e-82	0.232067	6.41126e-80	1	22981706	22982305	599	67	457	1.73219e-105	0.218567	9.14722e-103
1	21711287	21711886	599	41	460	3.23052e-113	0.158177	2.49208e-110	1	22989363	22989962	599	76	405	3.20847e-81	0.277141	5.39292e-79
1	21713482	21714081	599	36	317	2.05176e-71	0.209933	2.04764e-69	1	23012758	23013357	599	21	266	1.04574e-78	0.14769	1.51936e-76
1	21731769	21732368	599	20	354	8.8462e-100	0.116744	4.64201e-97	1	23033560	23034159	599	49	320	1.01746e-72	0.242585	1.03648e-70
1	21735430	21736029	599	99	470	4.4222e-72	0.333206	4.6287e-70	1	23034165	23034764	599	83	420	2.75699e-81	0.288408	4.65209e-79
1	21742648	21743247	599	31	298	9.43989e-70	0.198201	8.35949e-68	1	23056200	23056799	599	69	356	4.36834e-70	0.291524	3.78409e-68
1	21764403	21765002	599	56	363	1.01782e-69	0.26449	8.99594e-68	1	23058283	23058882	599	30	326	1.07813e-91	0.158042	3.14074e-89
1	21883569	21884168	599	67	472	1.56969e-94	0.234654	6.57195e-92	1	23073549	23074148	599	75	343	5.52856e-62	0.32625	2.89812e-60
1	21886640	21887239	599	20	268	1.50886e-70	0.156697	1.41575e-68	1	23088084	23088683	599	94	360	6.64986e-56	0.378927	2.38787e-54
1	21888372	21888971	599	5	242	2.87738e-80	0.0687677	5.34288e-78	1	23105458	23106057	599	33	331	1.43548e-90	0.168104	3.95804e-88
1	21890745	21891344	599	107	618	3.75733e-109	0.268565	2.64177e-106	1	23119994	23120593	599	52	253	2.61846e-48	0.327407	5.88573e-47
1	21892318	21892917	599	24	323	8.08058e-85	0.148229	2.00545e-82	1	23131410	23132009	599	29	296	1.16661e-81	0.170283	2.01147e-79
1	21916079	21916678	599	35	248	1.287e-50	0.266077	2.90467e-49	1	23151301	23151900	599	22	260	2.049e-75	0.156886	2.4491e-73
1	21951124	21951723	599	42	353	1.07135e-77	0.21315	1.67017e-75	1	23156338	23156937	599	93	442	1.05159e-81	0.302546	1.81881e-79
1	21973370	21973969	599	22	298	1.59432e-78	0.150755	2.62759e-76	1	23163761	23164360	599	66	299	7.32771e-54	0.33712	2.31578e-52
1	21975555	21976154	599	13	201	1.98309e-55	0.154649	6.26406e-54	1	23164663	23165262	599	35	234	2.83605e-54	0.254899	9.19937e-53
1	21984108	21984707	599	55	414	4.28761e-86	0.226803	1.14596e-83	1	23189201	23189800	599	26	266	1.32866e-73	0.1747	1.42679e-71
1	21997845	21998444	599	42	322	5.82127e-68	0.234853	4.53372e-66	1	23203562	23204161	599	85	361	2.08609e-61	0.345375	1.05456e-59
1	22007154	22007753	599	26	294	3.83355e-73	0.174471	4.33069e-71	1	23206732	23207331	599	56	340	3.97933e-74	0.255178	4.40493e-72
1	22009244	22009843	599	61	408	1.35175e-79	0.251893	2.39794e-77	1	23223648	23224247	599	73	400	1.08299e-81	0.270986	1.87133e-79
1	22057739	22058338	599	21	315	2.45792e-85	0.137115	6.28295e-83	1	23230152	23230751	599	67	356	1.81387e-71	0.284109	1.71164e-69
1	22058431	22059030	599	29	270	1.58308e-62	0.208459	8.28955e-61	1	23243656	23244255	599	27	274	1.47855e-75	0.174477	1.78215e-73
1	22064612	22065211	599	55	414	4.28761e-86	0.226803	1.14596e-83	1	23262579	23263178	599	47	306	1.69274e-69	0.245462	1.41652e-67
1	22066789	22067388	599	50	350	2.71048e-70	0.249354	2.49719e-68	1	23276996	23277595	599	29	297	5.01974e-82	0.169676	8.84118e-80
1	22070859	22071458	599	50	396	1.51719e-84	0.218973	3.70263e-82	1	23283720	23284319	599	37	331	8.63731e-87	0.18476	1.97146e-84
1	22072186	22072785	599	70	446	2.17355e-84	0.258738	5.24533e-82	1	23308384	23308983	599	86	428	7.59644e-82	0.291824	1.32408e-79
1	22076257	22076856	599	16	259	7.69899e-72	0.137265	7.92554e-70	1	23312665	23313264	599	14	259	4.83454e-84	0.112071	9.51645e-82
1	22078949	22079548	599	32	310	1.0125e-72	0.195085	1.10849e-70	1	23314992	23315591	599	116	542	1.6239e-98	0.298253	6.4906e-96
1	22093259	22093858	599	25	376	1.23972e-101	0.130442	6.9661e-99	1	23317920	23318519	599	62	419	2.10873e-96	0.223722	7.6705e-94
1	22176190	22176789	599	60	433	5.28573e-88	0.233286	1.57366e-85	1	23340361	23340960	599	37	296	2.79817e-74	0.207928	3.12747e-72
1	22200411	22201010	599	15	263	2.37115e-74	0.128765	2.92254e-72	1	23342845	23343444	599	69	384	2.8941e-79	0.269198	4.34452e-77
1	22221361	22221960	599	21	275	7.47054e-72	0.15832	7.70075e-70	1	23350926	23351525	599	19	282	6.1e-87	0.128531	1.40238e-84
1	22229286	22229885	599	122	532	1.55077e-75	0.353515	2.07974e-73	1	23471621	23472220	599	85	419	1.26995e-79	0.295313	1.9458e-77
1	22238959	22239558	599	65	421	1.51452e-80	0.2576	2.86693e-78	1	23478283	23478882	599	13	237	8.53355e-77	0.116777	1.10778e-74
1	22240842	22241441	599	39	414	4.83517e-100	0.169401	2.56315e-97	1	23494345	23494944	599	44	308	1.38238e-72	0.230522	1.39452e-70
1	22261522	22262121	599	46	351	9.32019e-74	0.231563	1.09966e-71	1	23498853	23499452	599	52	411	6.02559e-102	0.19611	2.77952e-99
1	22264078	22264677	599	29	308	7.41571e-75	0.181314	9.47409e-73	1	23526500	23527099	599	36	301	6.11775e-77	0.199683	7.998e-75
1	22265872	22266471	599	70	494	5.97094e-99	0.232494	3.03242e-96	1	23536232	23536831	599	129	560	5.34146e-96	0.317459	1.90749e-93
1	22268031	22268630	599	37	332	2.48962e-75	0.204526	3.2886e-73	1	23537903	23538502	599	148	575	2.06873e-89	0.350147	5.38331e-87
1	22273349	22273948	599	13	202	9.06334e-56	0.153829	2.93154e-54	1	23588701	23589300	599	73	384	1.9127e-76	0.282863	2.43251e-74
1	22278658	22279257	599	49	357	3.18205e-73	0.240028	3.6171e-71	1	23649252	23649851	599	87	464	7.61584e-93	0.270925	2.34545e-90
1	22294038	22294637	599	38	311	8.30386e-68	0.224056	6.386e-66	1	23661583	23662182	599	112	473	1.57177e-79	0.333096	2.39714e-77
1	22313061	22313660	599	38	365	4.83495e-85	0.189237	1.21379e-82	1	23666082	23666681	599	72	474	2.39881e-107	0.224082	1.35277e-104
1	22341992	22342591	599	95	497	3.6279e-82	0.302892	7.62148e-80	1	23669157	23669756	599	53	371	4.33688e-87	0.221989	1.00523e-84
1	22347334	22347933	599	32	332	7.25324e-80	0.181456	1.3108e-77	1	23677971	23678570	599	43	280	9.7166e-64	0.250102	5.68674e-62
1	22357723	22358322	599	21	327	2.06737e-89	0.131805	6.64896e-87	1	23685713	23686312	599	113	517	1.47679e-92	0.305977	4.48665e-90
1	22386422	22387021	599	23	290	8.26883e-75	0.160654	1.05262e-72	1	23687023	23687622	599	58	404	1.88648e-94	0.219378	6.27308e-92
1	22394400	22394999	599	35	486	5.44458e-128	0.1309	5.19477e-125	1	23711815	23712414	599	40	340	2.72565e-87	0.191671	6.37927e-85
1	22400726	22401325	599	39	326	1.06358e-71	0.217848	1.08346e-69	1	23716241	23716840	599	35	325	1.75967e-86	0.179889	3.95192e-84
1	22419344	22419943	599	17	233	6.13354e-62	0.160738	3.08378e-60	1	23729594	23730193	599	67	447	4.81008e-102	0.22369	2.2278e-99
1	22427710	22428309	599	47	356	1.66108e-74	0.232343	2.0704e-72	1	23733875	23734474	599	17	201	1.18434e-58	0.169506	5.04561e-57
1	22491180	22491779	599	32	320	5.8314e-76	0.188648	8.05435e-74	1	23748245	23748844	599	33	318	7.87179e-86	0.17537	1.70791e-83
1	22518702	22519301	599	31	298	9.43989e-70	0.198201	8.35949e-68	1	23748864	23749463	599	36	276	4.47203e-68	0.218897	3.4265e-66
1	22534407	22535006	599	49	300	6.12639e-56	0.288417	2.00479e-54	1	23783311	23783910	599	69	386	6.303e-80	0.267732	9.83418e-78
1	22541307	22541906	599	12	254	7.7933e-75	0.113813	9.9351e-73	1	23791287	23791886	599	88	417	5.14498e-77	0.306108	6.76679e-75
1	22544339	22544938	599	83	457	1.4832e-78	0.293158	2.45225e-76	1	23796308	23796907	599	54	480	8.70636e-125	0.172174	7.78894e-122
1	22547177	22547776	599	56	380	7.28182e-75	0.252054	9.31001e-73	1	23800437	23801036	599	80	388	5.21195e-73	0.303365	5.39932e-71
1	22548519	22549118	599	34	336	2.61052e-79	0.188316	4.53904e-77	1	23802620	23803219	599	36	377	1.75325e-104	0.157469	8.9293e-102
1	22554439	22555038	599	17	325	2.43613e-93	0.11292	9.6081e-91	1	23803492	23804091	599	64	410	9.7225e-92	0.235296	2.83893e-89
1	22560448	22561047	599	50	398	3.58308e-85	0.217817	9.08032e-83	1	23825015	23825614	599	55	408	2.51182e-98	0.207387	9.9522e-96
1	22575252	22575851	599	22	358	7.49014e-99	0.124211	3.78966e-96	1	23832647	23833246	599	54	391	3.20128e-93	0.213468	1.00488e-90
1	22575885	22576484	599	45	397	4.28373e-89	0.199667	1.35478e-86	1	23833992	23834591	599	55	313	8.01256e-66	0.27418	5.34115e-64
1	22597998	22598597	599	63	387	8.03028e-72	0.273849	8.24905e-70	1	23843181	23843780	599	61	516	2.46339e-131	0.177387	2.47695e-128
1	22602974	22603573	599	125	452	3.09991e-53	0.428523	8.39517e-52	1	23852736	23853335	599	144	512	3.4951e-73	0.385402	3.65504e-71
1	22628752	22629351	599	17	322	2.64358e-92	0.114031	9.88986e-90	1	23882991	23883590	599	170	680	2.96178e-108	0.334075	1.72132e-105
1	22629907	22630506	599	25	268	1.46243e-65	0.186556	9.54956e-64	1	23888559	23889158	599	58	354	2.43542e-77	0.252082	3.26448e-75
1	22641466	22642065	599	25	288	3.84478e-72	0.172845	4.04234e-70	1	23902448	23903047	599	94	438	8.57415e-80	0.308378	1.32656e-77
1	22673888	22674487	599	97	501	5.09259e-82	0.306025	1.05922e-79	1	23907510	23908109	599	32	238	4.09177e-58	0.23256	1.6847e-56
1	22680686	22681285	599	77	499	3.54247e-95	0.250206	1.53001e-92	1	23924456	23925055	599	63	296	7.96603e-55	0.327184	2.67299e-53
1	22689240	22689839	599	165	579	2.4137e-65	0.426613	1.55258e-63	1	23943197	23943796	599	70	483	4.79856e-112	0.214345	3.13654e-109
1	22696035	22696634	599	81	427	3.03409e-71	0.308035	2.99307e-69	1	23952537	23953136	599	61	424	6.16579e-99	0.217853	2.51033e-96
1	22701936	22702535	599	82	431	9.71435e-72	0.308376	9.9247e-70	1	23954191	23954790	599	35	286	1.75233e-72	0.205936	1.75791e-70
1	22714017	22714616	599	55	380	1.26206e-75	0.248168	1.70093e-73	1	23962889	23963488	599	21	320	4.33007e-99	0.121432	1.773e-96
1	22718176	22718775	599	49	353	5.4383e-72	0.242894	5.65721e-70	1	23973310	23973909	599	85	437	1.9846e-85	0.282571	4.21278e-83
1	22722184	22722783	599	41	344	1.06856e-75	0.214641	1.44762e-73	1	23976065	23976664	599	132	571	1.45337e-97	0.317674	5.57168e-95
1	22752638	22753237	599	80	349	3.52106e-50	0.376625	7.71958e-49	1	23986605	23987204	599	31	390	1.93825e-114	0.134385	1.35742e-111
1	22761225	22761824	599	22	272	7.93659e-70	0.166072	7.06655e-68	1	24010664	24011263	599	91	422	1.14957e-76	0.311483	1.47998e-74
1	22795920	22796519	599	39	414	4.83517e-100	0.169401	2.56315e-97	1	24023170	24023769	599	68	475	6.67528e-111	0.212647	4.21908e-108
1	22797987	22798586	599	87	457	6.31897e-76	0.30569	8.70514e-74	1	24041931	24042530	599	83	306	4.42287e-46	0.402586	8.67269e-45
1	22807117	22807716	599	110	524	2.20743e-80	0.327004	4.12727e-78	1	24042969	24043568	599	50	385	1.71437e-94	0.203107	5.71375e-92
1	22812370	22812969	599	29	441	2.78235e-119	0.124267	2.39967e-116	1	24052286	24052885	599	88	447	1.26339e-86	0.284606	2.85652e-84
1	22815872	22816471	599	42	504	8.95632e-127	0.146707	8.42675e-124	1	24069693	24070292	599	73	382	8.58568e-76	0.28442	1.04972e-73
1	22818608	22819207	599	13	194	4.71827e-53	0.160641	1.26109e-51	1	24083182	24083781	599	29	322	3.16839e-91	0.155778	9.01706e-89
1	22909305	22909904	599	76	427	1.48023e-74	0.291151	1.85074e-72	1	24095125	24095724	599	170	619	2.95132e-90	0.368353	8.01021e-88
1	22918426	22919025	599	146	497	2.60904e-54	0.447109	7.62205e-53	1	24096031	24096630	599	121	475	6.82963e-75	0.35568	7.91759e-73
1	22923673	22924272	599	26	334	2.0048e-86	0.152463	5.45657e-84	1	24103704	24104303	599	65	362	7.41213e-75	0.271855	8.57378e-73
1	22931368	22931967	599	69	366	1.35869e-61	0.314433	6.65506e-60	1	24108677	24109276	599	76	367	6.17559e-69	0.307385	4.99341e-67
1	22940693	22941292	599	29	251	1.88496e-56	0.225268	6.39406e-55	1	24129432	24130031	599	22	265	2.81814e-77	0.153743	3.76103e-75
1	22944227	22944826	599	45	420	1.84996e-96	0.188205	8.4708e-94	1	24133854	24134453	599	180	570	1.90234e-71	0.423134	1.79295e-69
1	22947119	22947718	599	63	434	5.4777e-86	0.242807	1.45443e-83	1	24142032	24142631	599	42	297	2.10604e-70	0.23035	1.85968e-68
1	22956514	22957113	599	47	401	1.2183e-88	0.205002	3.75541e-86	1	24144509	24145108	599	78	480	9.75174e-105	0.23733	5.01063e-102
1	22959533	22960132	599	53	368	1.71442e-73	0.248637	1.98515e-71	1	24147374	24147973	599	69	377	5.91548e-77	0.274457	7.74057e-75
1	22961820	22962419	599	84	525	7.31634e-98	0.2563	3.55661e-95	1	24149502	24150101	599	87	384	2.74671e-67	0.330413	2.00163e-65
1	22969243	22969842	599	63	382	2.45339e-70	0.277619	2.26713e-68	1	24155476	24156075	599	106	475	8.15525e-84	0.315551	1.58489e-81
1	22980394	22980993	599	44	372	5.19725e-82	0.209772	1.08039e-79	1	24158403	24159002	599	37	337	5.92498e-89	0.181291	1.50828e-86
1	22981717	22982316	599	51	518	1.1155e-122	0.168115	1.00257e-119	1	24180526	24181125	599	137	529	6.19728e-82	0.355889	1.08449e-79
1	22989375	22989974	599	53	362	1.16036e-71	0.252977	1.17864e-69	1	24190846	24191445	599	98	439	1.40808e-77	0.319347	1.91168e-75
1	23013087	23013686	599	37	251	5.2874e-50	0.275069	1.14428e-48	1	24203602	24204201	599	67	377	2.19138e-78	0.267476	3.12614e-76
1	23026145	23026744	599	82	362	1.52684e-52	0.370413	3.93817e-51	1	24207719	24208318	599	93	475	2.74926e-92	0.280577	8.24796e-90
1	23047152	23047751	599	33	310	8.09212e-72	0.200065	8.30958e-70	1	24241276	24241875	599	27	274	1.47855e-75	0.174477	1.78215e-73
1	23049733	23050332	599	118	548	3.32262e-82	0.332543	6.9983e-80	1	24242467	24243066	599	73	407	5.28413e-84	0.266094	1.03813e-81
1	23058280	23058879	599	12	338	2.95779e-104	0.084097	1.81085e-101	1	24248572	24249171	599	61	371	8.26344e-81	0.25066	1.35741e-78
1	23059096	23059695	599	127	522	4.14623e-70	0.373994	3.76414e-68	1	24261712	24262311	599	45	318	3.07328e-75	0.227143	3.63616e-73
1	23091410	23092009	599	40	349	3.85092e-78	0.207069	6.19004e-76	1	24289004	24289603	599	110	524	1.08024e-96	0.294463	3.98272e-94
1	23098577	23099176	599	5	211	3.69624e-69	0.0796042	3.13628e-67	1	24294433	24295032	599	63	385	5.06272e-84	0.247945	9.95674e-82
1	23131420	23132019	599	21	316	1.1258e-85	0.136656	2.93476e-83	1	24297256	24297855	599	125	564	1.02306e-99	0.306209	4.29788e-97
1	23151407	23152006	599	28	397	1.7639e-105	0.134881	1.12071e-102	1	24298361	24298960	599	76	341	9.93507e-61	0.332127	4.81146e-59
1	23156296	23156895	599	72	411	1.30507e-72	0.288953	1.41983e-70	1	24306206	24306805	599	31	294	5.21962e-79	0.18105	7.71993e-77
1	23163775	23164374	599	39	302	3.68783e-64	0.236187	2.175e-62	1	24335292	24335891	599	26	228	8.24624e-60	0.205856	3.77438e-58
1	23164533	23165132	599	18	254	5.96109e-68	0.153076	4.63776e-66	1	24339696	24340295	599	112	487	7.78512e-84	0.323089	1.51524e-81
1	23189219	23189818	599	13	256	2.63606e-74	0.119461	3.23952e-72	1	24348954	24349553	599	29	244	7.75179e-63	0.209051	4.28806e-61
1	23223596	23224195	599	37	448	3.29966e-113	0.149257	2.54519e-110	1	24353475	24354074	599	34	356	9.50489e-99	0.159549	3.83655e-96
1	23262553	23263152	599	28	325	2.04427e-81	0.166525	4.08824e-79	1	24359783	24360382	599	81	395	1.37807e-74	0.301014	1.56888e-72
1	23277021	23277620	599	21	316	1.1258e-85	0.136656	2.93476e-83	1	24366379	24366978	599	60	525	1.8292e-135	0.171731	1.95164e-132
1	23283720	23284319	599	22	310	1.45681e-82	0.144589	3.1397e-80	1	24376960	24377559	599	8	239	3.80718e-84	0.0832281	7.53968e-82
1	23312639	23313238	599	9	310	1.51596e-98	0.0757168	7.57684e-96	1	24397085	24397684	599	19	222	2.15596e-64	0.16579	1.31413e-62
1	23315010	23315609	599	73	510	1.56388e-101	0.23333	8.75489e-99	1	24416775	24417374	599	47	334	3.70895e-79	0.223776	5.53392e-77
1	23317868	23318467	599	35	335	4.48169e-78	0.193479	7.16269e-76	1	24417619	24418218	599	87	384	2.74671e-67	0.330413	2.00163e-65
1	23340361	23340960	599	33	334	1.38923e-79	0.184912	2.46037e-77	1	24434748	24435347	599	79	424	2.41274e-85	0.273319	5.09428e-83
1	23342847	23343446	599	54	366	4.03343e-72	0.254118	4.23011e-70	1	24435360	24435959	599	109	441	1.4172e-71	0.34976	1.34462e-69
1	23350850	23351449	599	25	301	1.90294e-76	0.16495	2.72129e-74	1	24450113	24450712	599	18	246	1.92106e-74	0.142617	2.16561e-72
1	23407605	23408204	599	80	372	1.9619e-56	0.352145	6.64664e-55	1	24458111	24458710	599	14	245	1.16883e-78	0.118895	1.69474e-76
1	23452116	23452715	599	111	530	1.93627e-81	0.325793	3.88332e-79	1	24482048	24482647	599	36	225	2.03509e-50	0.272059	5.19933e-49
1	23458473	23459072	599	39	338	1.66627e-75	0.209694	2.22869e-73	1	24485786	24486385	599	76	388	1.09923e-75	0.289912	1.33351e-73
1	23469237	23469836	599	4	236	1.0187e-79	0.0626491	1.82152e-77	1	24519338	24519937	599	150	454	3.34746e-54	0.453693	1.0812e-52
1	23471619	23472218	599	51	471	1.72855e-107	0.185686	1.16299e-104	1	24536558	24537157	599	31	324	5.80923e-90	0.163371	1.55327e-87
1	23478203	23478802	599	8	252	2.16506e-79	0.0873579	3.78646e-77	1	24558959	24559558	599	59	358	6.20035e-78	0.252831	8.6091e-76
1	23498855	23499454	599	37	374	7.10012e-89	0.1804	2.21774e-86	1	24589859	24590458	599	180	798	2.36281e-138	0.298344	2.63551e-135
1	23526499	23527098	599	37	324	8.89179e-73	0.20986	9.78086e-71	1	24614502	24615101	599	17	512	7.78038e-179	0.0630974	1.22026e-175
1	23536170	23536769	599	81	453	9.7473e-79	0.289535	1.63e-76	1	24618365	24618964	599	54	324	3.06191e-70	0.26021	2.68067e-68
1	23537917	23538516	599	121	574	1.41771e-87	0.324157	4.12395e-85	1	24619371	24619970	599	65	363	3.45925e-75	0.271066	4.08076e-73
1	23588093	23588692	599	40	327	3.57092e-71	0.221791	3.5014e-69	1	24638386	24638985	599	41	372	7.10605e-98	0.17799	2.76136e-95
1	23588761	23589360	599	55	369	2.81169e-72	0.255957	2.98584e-70	1	24654284	24654883	599	61	369	3.9045e-80	0.25209	6.16539e-78
1	23597970	23598569	599	8	217	4.95552e-67	0.102459	3.60452e-65	1	24673899	24674498	599	120	418	8.19133e-59	0.403597	3.52106e-57
1	23607094	23607693	599	8	243	3.31757e-76	0.0908058	4.66272e-74	1	24710828	24711427	599	60	337	3.57676e-70	0.273422	3.11871e-68
1	23633964	23634563	599	7	222	3.6367e-70	0.0919251	3.31886e-68	1	24711813	24712412	599	30	264	4.22434e-69	0.197602	3.44762e-67
1	23666030	23666629	599	48	396	3.28026e-86	0.211477	8.82343e-84	1	24719348	24719947	599	68	523	1.12125e-127	0.192297	1.0606e-124
1	23669185	23669784	599	39	356	2.98505e-81	0.198533	5.91041e-79	1	24720696	24721295	599	90	426	1.42144e-78	0.305388	2.05026e-76
1	23677977	23678576	599	30	279	1.57724e-64	0.206938	9.55506e-63	1	24734340	24734939	599	140	529	2.86785e-80	0.363004	4.56546e-78
1	23685716	23686315	599	90	490	1.97824e-83	0.292909	4.50387e-81	1	24745825	24746424	599	40	286	3.1966e-68	0.230124	2.46907e-66
1	23687024	23687623	599	38	375	2.81746e-88	0.18393	8.51867e-86	1	24780419	24781018	599	61	369	3.9045e-80	0.25209	6.16539e-78
1	23711804	23712403	599	26	317	9.30726e-81	0.161109	1.78574e-78	1	24808591	24809190	599	103	483	3.14221e-88	0.302173	7.71146e-86
1	23716255	23716854	599	35	321	1.43145e-73	0.202398	1.66807e-71	1	24815828	24816427	599	51	422	9.92187e-107	0.187601	5.4775e-104
1	23729624	23730223	599	91	472	1.27176e-77	0.30762	1.97378e-75	1	24818007	24818606	599	118	457	3.14672e-71	0.362015	2.92519e-69
1	23748247	23748846	599	29	357	4.95681e-91	0.155154	1.73469e-88	1	24824103	24824702	599	38	301	3.51707e-75	0.208856	4.14697e-73
1	23748997	23749596	599	16	253	8.54592e-70	0.140729	7.58522e-68	1	24904807	24905406	599	62	426	8.1085e-99	0.219867	3.28286e-96
1	23783353	23783952	599	23	297	3.79624e-77	0.156647	5.69888e-75	1	24917306	24917905	599	67	421	3.68097e-93	0.238192	1.15066e-90
1	23796350	23796949	599	65	505	2.4927e-106	0.212932	1.62492e-103	1	24921838	24922437	599	161	572	1.77498e-81	0.380366	3.0308e-79
1	23802640	23803239	599	35	335	4.48169e-78	0.193479	7.16269e-76	1	24995540	24996139	599	122	413	2.20894e-56	0.414904	8.16777e-55
1	23814668	23815267	599	17	342	3.21693e-99	0.107005	1.65117e-96	1	25008041	25008640	599	25	226	5.24199e-60	0.201416	2.42832e-58
1	23825017	23825616	599	47	409	3.50284e-91	0.200794	1.23633e-88	1	25018661	25019260	599	68	470	3.59385e-109	0.215014	2.15198e-106
1	23826924	23827523	599	20	352	4.30048e-99	0.117443	2.19798e-96	1	25031896	25032495	599	80	332	1.59013e-55	0.357486	5.57445e-54
1	23833980	23834579	599	42	315	8.73264e-66	0.24037	5.79714e-64	1	25036543	25037142	599	83	466	2.41028e-96	0.258651	8.74624e-94
1	23835761	23836360	599	28	278	5.1357e-66	0.196458	3.46749e-64	1	25044862	25045461	599	89	444	5.53842e-85	0.289523	1.14765e-82
1	23843192	23843791	599	33	463	2.23248e-122	0.131198	1.99988e-119	1	25047912	25048511	599	53	335	1.00944e-74	0.247195	1.15706e-72
1	23871076	23871675	599	14	229	7.45135e-64	0.141889	4.29521e-62	1	25086615	25087214	599	79	410	8.99398e-81	0.28312	1.47508e-78
1	23882992	23883591	599	118	536	6.3813e-79	0.340312	1.08149e-76	1	25116673	25117272	599	110	451	5.14695e-74	0.344469	5.6632e-72
1	23888612	23889211	599	72	422	7.79326e-76	0.281055	1.06718e-73	1	25143787	25144386	599	32	266	5.13641e-68	0.206608	3.92095e-66
1	23902452	23903051	599	68	450	4.51861e-87	0.249896	1.27751e-84	1	25162208	25162807	599	43	365	1.55607e-93	0.189008	4.95516e-91
1	23903312	23903911	599	14	267	6.61956e-77	0.120498	9.78649e-75	1	25187960	25188559	599	24	250	1.06906e-69	0.175125	9.05318e-68
1	23907511	23908110	599	25	302	8.85898e-77	0.164372	1.29634e-74	1	25219674	25220273	599	43	355	5.76165e-90	0.194619	1.54101e-87
1	23924456	23925055	599	46	274	2.35874e-50	0.30088	5.2326e-49	1	25228095	25228694	599	46	333	1.23423e-79	0.220422	1.89333e-77
1	23943165	23943764	599	53	435	2.63947e-94	0.208579	1.09222e-91	1	25236499	25237098	599	75	395	1.19857e-78	0.281209	1.73668e-76
1	23952411	23953010	599	38	412	2.42817e-100	0.166614	1.30179e-97	1	25241739	25242338	599	174	647	3.04421e-96	0.359425	1.09936e-93
1	23955303	23955902	599	87	482	4.06563e-83	0.289121	9.07776e-81	1	25254260	25254859	599	78	378	3.92863e-71	0.304899	3.63206e-69
1	23962862	23963461	599	26	345	4.16568e-90	0.147341	1.39086e-87	1	25311069	25311668	599	107	462	3.62251e-79	0.327609	5.40968e-77
1	23976055	23976654	599	100	514	8.5883e-84	0.306202	1.99883e-81	1	25332215	25332814	599	99	564	2.78222e-117	0.248033	2.09914e-114
1	23986600	23987199	599	25	356	7.24301e-95	0.138167	3.08254e-92	1	25340655	25341254	599	282	657	6.17267e-52	0.554813	1.73229e-50
1	23998463	23999062	599	65	410	3.0364e-77	0.264857	4.59086e-75	1	25345766	25346365	599	114	544	1.92036e-100	0.292469	8.32067e-98
1	24003083	24003682	599	50	303	4.04334e-56	0.290364	1.34002e-54	1	25359309	25359908	599	39	311	7.49418e-78	0.206179	1.03462e-75
1	24008549	24009148	599	10	268	2.65368e-82	0.0947926	5.62237e-80	1	25364907	25365506	599	78	445	5.38176e-93	0.256903	1.66981e-90
1	24010673	24011272	599	65	410	3.0364e-77	0.264857	4.59086e-75	1	25365507	25366106	599	53	352	1.5626e-80	0.234624	2.52748e-78
1	24023167	24023766	599	78	462	1.97191e-83	0.27431	4.48982e-81	1	25375721	25376320	599	152	567	7.73584e-85	0.364094	1.59222e-82
1	24042969	24043568	599	29	395	9.65184e-104	0.139493	5.82467e-101	1	25386584	25387183	599	141	596	8.25993e-100	0.32267	3.48573e-97
1	24050524	24051123	599	84	444	3.71198e-74	0.305386	4.51385e-72	1	25403482	25404081	599	35	394	9.37416e-112	0.146871	6.07779e-109
1	24069903	24070502	599	82	438	9.63552e-74	0.303212	1.13598e-71	1	25404754	25405353	599	38	313	1.93255e-79	0.200397	2.92776e-77
1	24075605	24076204	599	195	620	1.4309e-61	0.46364	7.00114e-60	1	25415484	25416083	599	32	345	1.08296e-96	0.156911	3.9924e-94
1	24080851	24081450	599	68	433	5.96623e-82	0.260186	1.23689e-79	1	25416238	25416837	599	80	400	7.3959e-77	0.293811	9.63245e-75
1	24083177	24083776	599	33	290	2.06306e-65	0.214697	1.33269e-63	1	25424248	25424847	599	31	289	3.39172e-77	0.184369	4.50634e-75
1	24095127	24095726	599	113	539	1.01048e-82	0.325329	2.19764e-80	1	25431284	25431883	599	101	436	8.44196e-75	0.330478	9.72164e-73
1	24096119	24096718	599	82	464	2.91951e-81	0.285443	5.78534e-79	1	25433499	25434098	599	51	333	1.34596e-75	0.240688	1.62684e-73
1	24108688	24109287	599	48	322	2.78584e-63	0.262962	1.54165e-61	1	25438096	25438695	599	54	307	1.48807e-64	0.275462	9.16567e-63
1	24111131	24111730	599	28	315	4.08353e-78	0.172115	6.54749e-76	1	25442727	25443326	599	45	323	5.60458e-77	0.223431	7.35148e-75
1	24133854	24134453	599	118	597	7.43686e-96	0.304156	3.31496e-93	1	25449097	25449696	599	78	386	1.07833e-73	0.298258	1.16388e-71
1	24141971	24142570	599	24	299	8.62164e-77	0.160837	1.26346e-74	1	25451872	25452471	599	20	295	9.73811e-91	0.12745	2.70794e-88
1	24144509	24145108	599	42	485	1.75039e-120	0.152719	1.53242e-117	1	25462514	25463113	599	24	307	7.4672e-91	0.140841	2.08682e-88
1	24155481	24156080	599	84	443	7.17014e-74	0.306108	8.53772e-72	1	25471144	25471743	599	141	505	9.47982e-73	0.383523	9.67068e-71
1	24157393	24157992	599	95	467	1.08645e-73	0.323268	1.27642e-71	1	25477205	25477804	599	30	293	1.34826e-79	0.176922	2.06296e-77
1	24158414	24159013	599	22	288	3.60466e-75	0.156305	4.70605e-73	1	25538598	25539197	599	66	316	3.14459e-59	0.31797	1.38872e-57
1	24159303	24159902	599	42	397	9.49121e-92	0.188371	3.45057e-89	1	25545488	25546087	599	28	333	2.47321e-96	0.146153	8.97133e-94
1	24181625	24182224	599	119	514	2.09959e-72	0.35826	2.24787e-70	1	25562761	25563360	599	93	421	4.38228e-75	0.318386	5.13274e-73
1	24190781	24191380	599	91	438	4.65961e-68	0.332669	3.6551e-66	1	25574518	25575117	599	43	329	9.28195e-81	0.210872	1.52101e-78
1	24203196	24203795	599	42	383	2.98748e-87	0.195615	8.5316e-85	1	25590730	25591329	599	40	296	1.0319e-71	0.221898	9.8824e-70
1	24207729	24208328	599	69	446	4.01409e-85	0.255492	1.01468e-82	1	25595177	25595776	599	28	295	2.82101e-82	0.166124	5.0358e-80
1	24241290	24241889	599	16	264	1.51067e-73	0.134504	1.75813e-71	1	25599948	25600547	599	165	520	5.72506e-65	0.429718	3.61714e-63
1	24242456	24243055	599	58	406	2.86636e-81	0.242361	5.68292e-79	1	25601133	25601732	599	43	362	1.83688e-92	0.190658	5.55382e-90
1	24248533	24249132	599	16	274	5.71904e-77	0.129299	8.48504e-75	1	25604877	25605476	599	29	290	1.82547e-79	0.174016	2.77241e-77
1	24259644	24260243	599	46	413	2.49808e-93	0.195156	9.84554e-91	1	25617521	25618120	599	47	354	3.81034e-86	0.210467	8.40721e-84
1	24261730	24262329	599	47	375	1.93922e-80	0.219968	3.64273e-78	1	25640745	25641344	599	17	268	6.51321e-84	0.124716	1.27338e-81
1	24288976	24289575	599	99	500	1.82199e-80	0.312332	3.43083e-78	1	25676159	25676758	599	115	672	1.47262e-141	0.236595	1.71848e-138
1	24294393	24294992	599	73	410	1.22071e-71	0.293231	1.23829e-69	1	25678796	25679395	599	17	254	1.37772e-78	0.132033	1.98896e-76
1	24297246	24297845	599	96	510	3.11614e-85	0.297609	7.92405e-83	1	25687091	25687690	599	88	340	2.49693e-53	0.379431	7.64554e-52
1	24298359	24298958	599	53	351	2.53528e-68	0.261335	2.02615e-66	1	25694032	25694631	599	67	375	1.00829e-77	0.268976	1.38261e-75
1	24306190	24306789	599	19	271	1.28601e-72	0.148888	1.40002e-70	1	25742253	25742852	599	54	268	8.60348e-52	0.318116	2.39589e-50
1	24332697	24333296	599	18	246	2.94859e-65	0.158378	1.88415e-63	1	25759547	25760146	599	55	337	7.18097e-74	0.253603	7.8356e-72
1	24339689	24340288	599	81	457	6.69174e-80	0.286882	1.21164e-77	1	25772737	25773336	599	21	239	1.19871e-68	0.165501	9.52152e-67
1	24348949	24349548	599	28	272	4.5076e-64	0.201059	2.64322e-62	1	25775199	25775798	599	141	531	2.62903e-80	0.363938	4.19116e-78
1	24353491	24354090	599	34	336	2.61052e-79	0.188316	4.53904e-77	1	25780721	25781320	599	50	299	7.95517e-65	0.265172	4.98325e-63
1	24366375	24366974	599	40	490	3.86952e-124	0.145028	3.53932e-121	1	25786076	25786675	599	118	600	9.74881e-116	0.272463	7.06955e-113
1	24375782	24376381	599	24	295	1.85103e-75	0.163146	2.46478e-73	1	25808693	25809292	599	62	463	1.06846e-111	0.201495	6.9145e-109
1	24396261	24396860	599	8	222	8.59616e-69	0.0999951	7.11097e-67	1	25820980	25821579	599	7	153	8.26798e-52	0.123515	2.3059e-50
1	24417587	24418186	599	52	382	1.42042e-78	0.235183	2.35171e-76	1	25863032	25863631	599	47	354	3.81034e-86	0.210467	8.40721e-84
1	24425469	24426068	599	28	261	1.5898e-60	0.21007	7.20375e-59	1	25870385	25870984	599	69	356	4.36834e-70	0.291524	3.78409e-68
1	24434648	24435247	599	91	458	1.17199e-73	0.317468	1.37439e-71	1	25871943	25872542	599	25	291	7.8605e-84	0.153945	1.52929e-81
1	24435354	24435953	599	86	414	1.96204e-64	0.335579	1.1799e-62	1	25886445	25887044	599	56	346	3.73543e-76	0.250514	4.66431e-74
1	24450121	24450720	599	13	278	6.17288e-82	0.109447	1.2786e-79	1	25890310	25890909	599	202	589	1.8012e-66	0.455052	1.24967e-64
1	24453414	24454013	599	13	205	8.63596e-57	0.151419	3.0038e-55	1	25891627	25892226	599	131	585	1.60981e-102	0.307619	7.59937e-100
1	24458117	24458716	599	17	332	9.29271e-96	0.110408	4.1261e-93	1	25906354	25906953	599	113	453	7.08517e-73	0.351317	7.27718e-71
1	24460224	24460823	599	17	290	2.66276e-81	0.127381	5.29344e-79	1	25920972	25921571	599	93	509	2.15315e-103	0.261018	1.05147e-100
1	24536788	24537387	599	29	342	4.73228e-86	0.162334	1.26103e-83	1	25931266	25931865	599	15	228	5.43861e-71	0.134993	4.97702e-69
1	24543948	24544547	599	20	275	6.70289e-73	0.152467	7.44503e-71	1	25940889	25941488	599	77	440	4.63384e-92	0.257014	1.37484e-89
1	24548997	24549596	599	54	346	4.47767e-66	0.269615	3.0385e-64	1	25989452	25990051	599	36	285	2.97181e-71	0.211575	2.76701e-69
1	24558956	24559555	599	44	424	1.19331e-98	0.182834	5.98803e-96	1	25992920	25993519	599	44	480	2.09276e-134	0.144581	2.1998e-131
1	24579881	24580480	599	23	271	1.71308e-68	0.172622	1.38627e-66	1	26003518	26004117	599	17	240	2.76866e-73	0.140247	2.91861e-71
1	24589860	24590459	599	146	667	2.97395e-98	0.329084	1.4688e-95	1	26033292	26033891	599	68	344	7.02265e-67	0.298409	4.99461e-65
1	24614506	24615105	599	21	432	1.64886e-125	0.0983359	1.5323e-122	1	26037366	26037965	599	48	325	3.13734e-75	0.234486	3.70988e-73
1	24618366	24618965	599	57	343	5.03695e-63	0.285089	2.73667e-61	1	26053537	26054136	599	19	239	9.86326e-71	0.15324	8.89088e-69
1	24619407	24620006	599	47	357	8.11941e-75	0.231657	1.03426e-72	1	26056544	26057143	599	56	340	3.97933e-74	0.255178	4.40493e-72
1	24638260	24638859	599	28	358	2.19484e-92	0.150379	8.25233e-90	1	26061396	26061995	599	111	533	6.66748e-99	0.29165	2.71082e-96
1	24673889	24674488	599	71	403	5.87345e-71	0.291373	5.67265e-69	1	26081238	26081837	599	190	642	1.88708e-86	0.393054	4.2323e-84
1	24689102	24689701	599	30	289	9.45291e-68	0.199356	7.24631e-66	1	26085017	26085616	599	120	491	2.81993e-80	0.340992	4.48952e-78
1	24695365	24695964	599	16	253	8.54592e-70	0.140729	7.58522e-68	1	26123506	26124105	599	18	247	8.06406e-75	0.142003	9.30803e-73
1	24710647	24711246	599	59	351	5.5356e-64	0.286673	3.2272e-62	1	26144572	26145171	599	39	289	4.22043e-70	0.222826	3.66193e-68
1	24719567	24720166	599	145	506	5.88888e-57	0.43605	2.07131e-55	1	26161058	26161657	599	28	300	4.08512e-84	0.163194	8.06879e-82
1	24720659	24721258	599	49	349	9.23656e-71	0.245828	8.79314e-69	1	26175319	26175918	599	107	471	5.96869e-82	0.321061	1.04601e-79
1	24734478	24735077	599	153	625	4.50615e-83	0.367552	1.00177e-80	1	26179956	26180555	599	26	271	1.94985e-75	0.17128	2.33405e-73
1	24739228	24739827	599	22	303	3.32188e-80	0.148124	6.14298e-78	1	26183777	26184376	599	49	404	4.28713e-102	0.189781	1.98911e-99
1	24745832	24746431	599	29	332	9.58846e-83	0.167496	2.08922e-80	1	26189244	26189843	599	91	485	6.37218e-97	0.269248	2.37212e-94
1	24808489	24809088	599	40	437	1.26865e-106	0.163488	8.33624e-104	1	26190952	26191551	599	47	346	2.42363e-83	0.215599	4.59127e-81
1	24811897	24812496	599	230	666	1.38872e-57	0.501874	5.11079e-56	1	26193359	26193958	599	17	238	1.57721e-72	0.141503	1.58686e-70
1	24815825	24816424	599	30	360	5.07242e-91	0.158075	1.77302e-88	1	26209732	26210331	599	62	314	3.0367e-61	0.303126	1.51987e-59
1	24824058	24824657	599	21	282	3.35932e-74	0.154155	4.0955e-72	1	26211412	26212011	599	50	282	3.80724e-59	0.282135	1.67074e-57
1	24838745	24839344	599	65	410	3.0364e-77	0.264857	4.59086e-75	1	26234600	26235199	599	83	474	5.31496e-99	0.254085	2.16919e-96
[truncated: 8,323 more rows]
