# Supplementary material for: Genome-wide identification of silencers and their regulatory mechanism in gene transcription in Arabidopsis
Source: Research Square preprint supplement (doi:10.21203/rs.3.rs-5559292/v1), 2025-01-13
Supplement: Supplementary file 7 [file c73aa99e70d6cdfadcb78776.xlsx]

## Sheet: summary
Supplementary Table 3 Motifs identified from silencer sequences
14-day-old leaves							28-day-old leaves
MOTIF_INDEX	MOTIF_ID	ALT_ID	CONSENSUS	WIDTH	SITES	E-VALUE	MOTIF_INDEX	MOTIF_ID	ALT_ID	CONSENSUS	WIDTH	SITES	E-VALUE
1	MA0933.1	AHL20	AATTAAWT	8	9243	7e-79	1	MA0933.1	AHL20	AATTAAWT	8	8402	3.2e-75
2	MA0934.1	AHL25	AWTTAAWT	8	8591	7e-70	2	MA1682.1	TCX3	WWAAATTCAAATWT	14	7691	4.6e-74
3	MA1682.1	TCX3	WWAAATTCAAATWT	14	8330	1.1e-63	3	MA0932.1	AHL12	AAWWWWTT	8	7729	8e-58
4	MA0932.1	AHL12	AAWWWWTT	8	8335	1.3e-62	4	MA0934.1	AHL25	AWTTAAWT	8	7650	7.6e-52
5	TTTKTTTTYTTTTKT	MEME-1	TTTKTTTTYTTTTKT	15	1267	2e-46	5	AAAAAMAAAAAVAAA	MEME-1	AAAAAMAAAAAVAAA	15	1166	4.7e-46
6	MA1162.1	TCX2	WTTYAAAATTYAAAW	15	5206	4.6e-46	6	MA1162.1	TCX2	WTTYAAAATTYAAAW	15	4917	8e-46
7	MA1161.1	TSO1	WWTTWAAAATTTAAA	15	5735	8e-45	7	MA1379.1	SOL1	WTTWAAAATTTAAAW	15	4854	1.9e-45
8	MA1379.1	SOL1	WTTWAAAATTTAAAW	15	5269	3.9e-44	8	MA1161.1	TSO1	WWTTWAAAATTTAAA	15	5292	3.1e-41
9	MA1327.2	ATHB-23	WTAATTAAWW	10	5964	7.1e-41	9	MA1380.1	TCX6	WTTTAAATTTTTWAA	15	5282	8.4e-40
10	MA1328.1	ZHD9	WTWAWHNVYTAATYA	15	7543	1.2e-40	10	MA1329.2	ZHD1	WWAYTAATTAAWW	13	6260	2e-39
11	MA1329.2	ZHD1	WWAYTAATTAAWW	13	6936	2e-40	11	MA1328.1	ZHD9	WTWAWHNVYTAATYA	15	6879	1.7e-38
12	MA1380.1	TCX6	WTTTAAATTTTTWAA	15	5750	2.3e-38	12	MA0952.1	ATHB-51	AATWATTG	8	7033	2e-33
13	MA1330.1	ZHD6	AAWHRTAATTAAKDW	15	7368	5.3e-30	13	MA1327.2	ATHB-23	WTAATTAAWW	10	5245	9.8e-32
14	MA1369.1	HDG1	RYAATTAATGM	11	5054	1.8e-29	14	MA0951.1	ATHB-16	TAATMATT	8	6369	1.9e-31
15	MA1807.1	ZHD10	NWTAATTARTD	11	5834	1.6e-28	15	MA1212.1	ATHB-13	HYAATAATTDW	11	6230	5.7e-31
16	MA1757.1	HDG7	DCATTAAWTRY	11	5166	5e-28	16	2-AAACCAAA	STREME-2	AAACCAAA	8	2872	4.3e-28
17	MA1198.1	HAT2	WNYAATCATTD	11	7666	2.2e-26	17	MA1210.2	HAT22	WHCAATAATTGDD	13	6421	5.1e-27
18	MA1814.1	RIN	WWCTATTTTTGGDWW	15	9627	6.1e-23	18	MA0110.3	ATHB-5	HHCAATCATTNW	12	8918	5.3e-27
19	MA1375.1	ANL2	GCATTAATTRY	11	4653	8.3e-22	19	MA1198.1	HAT2	WNYAATCATTD	11	7135	1.1e-26
20	MA0110.3	ATHB-5	HHCAATCATTNW	12	9547	8.6e-21	20	MA2052.1	ZAT6	WNAATGATTGDD	12	9029	2.9e-26
21	MA0082.1	squamosa	MCAWAWATRGWAAN	14	9401	2.2e-20	21	MA1330.1	ZHD6	AAWHRTAATTAAKDW	15	6717	1.2e-25
22	MA0951.1	ATHB-16	TAATMATT	8	7138	6e-20	22	MA1807.1	ZHD10	NWTAATTARTD	11	5237	1.9e-25
23	MA1159.1	SGR5	AAAAWAAGACAAAAW	15	7678	1.3e-18	23	MA1213.2	ZHD3	WHCAATTATTGDW	13	5024	4.9e-24
24	MA1212.1	ATHB-13	HYAATAATTDW	11	6946	4e-18	24	MA0082.1	squamosa	MCAWAWATRGWAAN	14	8667	6.3e-24
25	CTTGATGTCATGTGT	MEME-2	CTTGATGTCATGTGT	15	62	6.4e-18	25	MA1824.1	Zm00001d005692	NNCAATAATTNN	12	8602	1.8e-22
26	MA0990.1	HDG11	HAWTWAATGC	10	10049	9.8e-18	26	MA1024.1	HAT1	SYAATCATKN	10	7370	1.9e-22
27	MA0952.1	ATHB-51	AATWATTG	8	7542	1.3e-17	27	MA1209.1	ATHB-20	HYAATAATTRA	11	3451	2.6e-22
28	MA1024.1	HAT1	SYAATCATKN	10	7848	4.7e-17	28	MA1159.1	SGR5	AAAAWAAGACAAAAW	15	7189	3.9e-22
29	MA1190.1	RVE5	AGATATTTTTD	11	4107	1.3e-16	29	MA1757.1	HDG7	DCATTAAWTRY	11	4729	3.9e-22
30	MA1211.1	ATHB-X	NYAATYATTDD	11	6095	2.4e-16	30	4-ACACAAA	STREME-4	ACACAAA	7	698	4.2e-22
31	MA2052.1	ZAT6	WNAATGATTGDD	12	9694	3.1e-16	31	MA1211.1	ATHB-X	NYAATYATTDD	11	5483	1.1e-21
32	MA1210.2	HAT22	WHCAATAATTGDD	13	6965	1.4e-15	32	MA0954.2	ATHB-7	TCAATGATTGRWT	13	5694	2e-21
33	MA1824.1	Zm00001d005692	NNCAATAATTNN	12	9375	8.4e-15	33	MA1181.1	MYB113	DAKTYMGTTAT	11	8066	8.2e-21
34	MA1326.1	ZHD5	NHGTRATTARB	11	7438	1.4e-14	34	MA1814.1	RIN	WWCTATTTTTGGDWW	15	8947	1.6e-20
35	MA1213.2	ZHD3	WHCAATTATTGDW	13	5560	6.4e-14	35	MA0990.1	HDG11	HAWTWAATGC	10	9297	2e-20
36	21-KRTATATAYM	STREME-21	21-KRTATATAYM	10	416	7.3e-14	36	MA1369.1	HDG1	RYAATTAATGM	11	4464	2.7e-20
37	MA0008.3	HAT5	WWWCAATAATTGAWW	15	4273	2.4e-13	37	MA1214.1	ATHB-40	DHACCAATAATTGDDNHHWWW	21	4234	2.2e-19
38	MA0954.2	ATHB-7	TCAATGATTGRWT	13	6176	2.5e-13	38	MA1215.1	ATHB-53	HCAATAATTGD	11	4499	3.1e-19
39	MA1208.1	GT-2	WTTTTTACCGYHDT	14	8643	2.6e-13	39	MA1406.1	ATHB-4	YAATSATTGB	10	7144	1.1e-17
40	MA1280.1	DOF5.4	VAAAAAGKWAAWWW	14	9237	3.4e-13	40	MA1174.1	MYB56	WWWWATAACGGWHWT	15	6629	1.2e-16
41	MA1183.1	RVE6	AGATATTTTTD	11	3912	1.2e-12	41	MA0950.1	ATHB-12	AATGATTG	8	9422	5e-16
42	GTATCTTCTAACAAG	MEME-3	GTATCTTCTAACAAG	15	39	1.5e-12	42	MA1375.1	ANL2	GCATTAATTRY	11	4165	2.6e-15
43	MA1406.1	ATHB-4	YAATSATTGB	10	7811	1.6e-12	43	MA1366.1	DF1	AYRGTAAAAAWDDWWW	16	7437	8.3e-15
44	MA0950.1	ATHB-12	AATGATTG	8	10144	3.4e-12	44	MA0008.3	HAT5	WWWCAATAATTGAWW	15	3782	1.4e-14
45	MA1046.1	NTL9	TTAAGTAAT	9	3189	3.7e-12	45	MA1326.1	ZHD5	NHGTRATTARB	11	6790	3.4e-14
46	MA1174.1	MYB56	WWWWATAACGGWHWT	15	7152	1.4e-11	46	15-AYTART	STREME-15	15-AYTART	6	3098	8.3e-14
47	MA1366.1	DF1	AYRGTAAAAAWDDWWW	16	8051	2.6e-11	47	MA1279.1	DOF1.5	RWAAAAADDAAAAAGTRAAAA	21	8787	1.6e-13
48	MA1181.1	MYB113	DAKTYMGTTAT	11	8639	3.4e-11	48	MA1208.1	GT-2	WTTTTTACCGYHDT	14	8016	1.7e-13
49	MA1215.1	ATHB-53	HCAATAATTGD	11	5080	1.1e-10	49	MA1173.1	MYB101	AAMHNTAACCGAAWH	15	9147	4.4e-13
50	MA1156.1	JKD	WWWWTTTTTGTCKTTTTSTD	20	6933	1.9e-10	50	MA1190.1	RVE5	AGATATTTTTD	11	3645	1.8e-12
51	MA1209.1	ATHB-20	HYAATAATTRA	11	3876	3.3e-10	51	MA1156.1	JKD	WWWWTTTTTGTCKTTTTSTD	20	6457	2e-12
52	MA0554.1	SOC1	WHTTTCCWTTTTTGG	15	8292	7.8e-10	52	MA1280.1	DOF5.4	VAAAAAGKWAAWWW	14	8518	7.7e-12
53	MA1661.1	GTL1	WHGGTTAAAAWW	12	8822	1.7e-09	53	MA0554.1	SOC1	WHTTTCCWTTTTTGG	15	7749	1.5e-11
54	MA1214.1	ATHB-40	DHACCAATAATTGDDNHHWWW	21	4707	2.1e-09	54	MA1269.1	DOF4.5	NAWAAAGTWRCTTT	14	8508	1.8e-11
55	MA1269.1	DOF4.5	NAWAAAGTWRCTTT	14	9226	4.3e-09	55	MA1365.2	AT5G47660	WHGGTAAAAWW	11	7650	1.4e-10
56	MA1279.1	DOF1.5	RWAAAAADDAAAAAGTRAAAA	21	9457	4.6e-09	56	MA0953.1	ATHB-6	NCAATHATD	9	9530	1.7e-10
57	MA1365.2	AT5G47660	WHGGTAAAAWW	11	8326	1.7e-08	57	MA1661.1	GTL1	WHGGTTAAAAWW	12	8128	2.7e-10
58	MA1272.2	DOF2.2	WNAAAAAGWW	10	6942	2e-08	58	MA1046.1	NTL9	TTAAGTAAT	9	2672	6e-10
59	MA1270.1	DOF3.2	KTWACTTTTTNNYTTTTTT	19	9265	7.9e-08	59	MA1183.1	RVE6	AGATATTTTTD	11	3538	1.4e-08
60	MA1187.1	RVE4	AGATATTTTT	10	3545	9e-08	60	MA1194.1	AT3G10580	RDWDWRGATAAGVWT	15	7072	2.1e-08
61	MA0973.1	CDF2	VAAAAAGYDN	10	10253	2.1e-07	61	7-ATGAACAACAGT	STREME-7	ATGAACAACAGT	12	51	2.2e-08
62	MA1371.1	IDD4	MASAAAAMGACAAAAAW	17	5027	2.2e-07	62	MA2026.1	MYB108	YWTACCTAACTTWHH	15	6535	2.9e-08
63	MA1012.1	AGL27	CTTTCYATTTTKGG	14	3983	2.3e-07	63	MA1267.1	DOF5.8	WHTTTTTTHYTTTTTACTTTTTNHTTTWW	29	8703	4e-08
64	MA0977.1	DOF2.5	AWAAAGTG	8	9636	1.8e-06	64	11-GWTCTTWGCWATAT	STREME-11	11-GWTCTTWGCWATAT	14	61	5.7e-08
65	MA1184.1	RVE1	HHVWAAATATCTWH	14	5055	2.6e-06	65	14-AAAAAAAAAAAAA	STREME-14	14-AAAAAAAAAAAAA	13	145	1.3e-07
66	MA0940.1	AP1	MYAAAAAWRGAAA	13	10023	3.3e-06	66	MA1270.1	DOF3.2	KTWACTTTTTNNYTTTTTT	19	8533	1.3e-07
67	MA0974.2	CDF3	DNAAAAAGTGWW	12	8975	3.3e-06	67	8-CAAATC	STREME-8	CAAATC	6	1111	1.6e-07
68	12-AATCATACAC	STREME-12	12-AATCATACAC	10	72	1.5e-05	68	MA1276.1	DOF3.5	VAWAAAGKDAA	11	7638	1.9e-07
69	MA1276.1	DOF3.5	VAWAAAGKDAA	11	8339	1.6e-05	69	13-ATGATAACAGA	STREME-13	13-ATGATAACAGA	11	104	2.3e-07
70	MA1273.1	DOF4.2	AAADNAAAAAGGYAAAAAA	19	8500	1.6e-05	70	3-TACTGAATAGATAAA	STREME-3	TACTGAATAGATAAA	15	67	2.4e-07
71	MA1182.1	RVE8	AGATATTTTWDD	12	3475	2e-05	71	MA0001.2	AGL3	VKTWCCAWWWATAGWWMN	18	6593	2.7e-07
72	MA1087.2	WRKY45	NHAAAAGTCAAMRNH	15	7079	2.2e-05	72	MA0940.1	AP1	MYAAAAAWRGAAA	13	9304	1.3e-06
73	MA0001.2	AGL3	VKTWCCAWWWATAGWWMN	18	7074	2.9e-05	73	MA1187.1	RVE4	AGATATTTTT	10	3171	3.2e-06
74	MA1160.1	IDD6	WWWWTTTTTGTCGTTTTSTK	20	5958	5.7e-05	74	MA1274.1	DOF3.6	TTTWCTTTTTHHYTTTTTTTT	21	8776	4.3e-06
75	10-AAAARAAAAAARAA	STREME-10	10-AAAARAAAAAARAA	14	591	8.7e-05	75	MA2051.1	NAC68	NNACAAGTAWNH	12	9269	5.6e-06
76	MA1267.1	DOF5.8	WHTTTTTTHYTTTTTACTTTTTNHTTTWW	29	9395	8.7e-05	76	MA1184.1	RVE1	HHVWAAATATCTWH	14	4533	6.7e-06
77	MA1373.1	GAF1	HABWAAACGACAAAA	15	4798	0.00016	77	MA1273.1	DOF4.2	AAADNAAAAAGGYAAAAAA	19	7749	6.9e-06
78	MA1274.1	DOF3.6	TTTWCTTTTTHHYTTTTTTTT	21	9479	0.00017	78	MA1268.1	CDF5	TTTTYACTTTTTYTTTTTTTTTTTTTW	27	8370	1.1e-05
79	3-AACAGRATGAACAAC	STREME-3	AACAGRATGAACAAC	15	60	0.00018	79	MA1012.1	AGL27	CTTTCYATTTTKGG	14	3660	2.3e-05
80	MA0953.1	ATHB-6	NCAATHATD	9	10264	0.00021	80	MA1662.1	AT3G10030	HDTTAACAGADNH	13	7846	2.4e-05
81	MA1778.1	MYB80	KTYYACCTAMYTWWW	15	8017	0.00022	81	MA0558.1	FLC	WNWWDCCMAAAATRGAAAGWW	21	7518	4.6e-05
82	MA2026.1	MYB108	YWTACCTAACTTWHH	15	6982	0.00022	82	MA1272.2	DOF2.2	WNAAAAAGWW	10	6233	4.6e-05
83	MA1277.1	DOF1.7	AAAAAVAAAAAGTARAAAAWR	21	9669	0.00027	83	MA1385.1	AT2G40260	TWWWAAHATTCTYTT	15	7563	5.4e-05
84	MA2051.1	NAC68	NNACAAGTAWNH	12	9972	0.00042	84	MA0973.1	CDF2	VAAAAAGYDN	10	9504	0.00013
85	MA2037.1	NAC096	NDCAAGTAAHH	11	9166	0.00043	85	ATGAGARAGGAGGGC	MEME-2	ATGAGARAGGAGGGC	15	24	0.00021
86	MA1275.1	DOF1.6	NNAWAAAGTRR	11	9270	0.00076	86	MA1275.1	DOF1.6	NNAWAAAGTRR	11	8575	0.00022
87	1-TAGGCCCA	STREME-1	TAGGCCCA	8	115	0.00082	87	MA1371.1	IDD4	MASAAAAMGACAAAAAW	17	4711	0.00022
88	MA1317.1	WRKY50	YKTTGACTTTTTH	13	4935	0.00083	88	MA1373.1	GAF1	HABWAAACGACAAAA	15	4385	0.00029
89	MA1173.1	MYB101	AAMHNTAACCGAAWH	15	9818	0.00094	89	MA0977.1	DOF2.5	AWAAAGTG	8	8920	0.00043
90	MA1706.1	AT1G14600	NWAYATTCTN	10	10222	0.0011	90	MA1823.1	Zm00001d027846	RRAAAGAAAARR	12	9514	0.00059
91	MA1268.1	CDF5	TTTTYACTTTTTYTTTTTTTTTTTTTW	27	9029	0.0012	91	ACACATGACATCAAG	MEME-3	ACACATGACATCAAG	15	34	0.0006
92	MA1401.1	RVE7	RAAAATATCTWA	12	1930	0.0022	92	MA0982.1	DOF2.4	DWAAAGB	7	9567	0.0006
93	MA1281.1	DOF5.1	RAAAAAGWAAAAARAAAAARA	21	9122	0.0027	93	MA1277.1	DOF1.7	AAAAAVAAAAAGTARAAAAWR	21	8945	0.00063
94	4-CAAAAAC	STREME-4	CAAAAAC	7	3295	0.0034	94	MA1160.1	IDD6	WWWWTTTTTGTCGTTTTSTK	20	5472	0.00083
95	MA2028.1	MYB49	NYTTACCTAACTWHH	15	7234	0.0038	95	1-GAAWCAG	STREME-1	GAAWCAG	7	1232	0.0012
96	MA1185.1	LHY	AGATATTTTN	10	4285	0.0039	96	MA1676.2	NAC062	NNRTTAAGTAAHHW	14	8711	0.0012
97	MA1385.1	AT2G40260	TWWWAAHATTCTYTT	15	8089	0.0064	97	MA1175.1	MYB81	VTAACHGWWTY	11	8876	0.0013
98	MA1205.1	AGL6	TTWCCAAAAAWGGAAAAWW	19	3860	0.007	98	MA1192.1	DIV1	WDWRGATAAGRTTWD	15	6065	0.0015
99	MA1662.1	AT3G10030	HDTTAACAGADNH	13	8385	0.0077	99	MA1309.1	WRKY3	AAAAGTCAACG	11	3837	0.0019
100	MA1383.1	KAN2	HTHRGAATATTCTTT	15	5334	0.0097	100	MA1301.1	WRKY33	AAAAGTCAACG	11	3719	0.002
101	2-CAAATYC	STREME-2	CAAATYC	7	3620	0.01	101	MA0054.1	myb.Ph3	TAACBGTTW	9	9199	0.0021
102	MA1093.1	WRKY75	HRGTCAAC	8	4942	0.01	102	MA1300.1	WRKY6	CGTTGACTWWDDYWDWNHH	19	3003	0.0022
103	MA0982.1	DOF2.4	DWAAAGB	7	10313	0.013	103	MA2037.1	NAC096	NDCAAGTAAHH	11	8495	0.0023
104	14-CTCTTTATCTATTCA	STREME-14	14-CTCTTTATCTATTCA	15	49	0.014	104	MA1765.1	MYB121	HYNTACCTAACWWW	14	7023	0.0024
105	MA1823.1	Zm00001d027846	RRAAAGAAAARR	12	10243	0.017	105	MA1042.1	MYB59	RTTAGGTA	8	8640	0.0036
106	MA1194.1	AT3G10580	RDWDWRGATAAGVWT	15	7705	0.018	106	MA1087.2	WRKY45	NHAAAAGTCAAMRNH	15	6630	0.0044
107	MA0054.1	myb.Ph3	TAACBGTTW	9	9882	0.021	107	MA1203.1	AGL63	TKCCAAAAATGGMAA	15	4789	0.0051
108	MA1294.1	MYB62	AHWAWAGTTAGGYAD	15	7437	0.024	108	MA1706.1	AT1G14600	NWAYATTCTN	10	9497	0.0055
109	MA1374.1	IDD7	HASAAAACGACAAAAAWW	18	4779	0.027	109	MA1304.1	WRKY59	HAAAAGTCAAMN	12	6261	0.0072
110	MA1191.1	RVE7L	HHHVAAAATATCTWA	15	4036	0.028	110	MA2028.1	MYB49	NYTTACCTAACTWHH	15	6694	0.0076
111	MA0556.1	AP3	WWCCAAAARWRGAAA	15	8122	0.038	111	MA1317.1	WRKY50	YKTTGACTTTTTH	13	4617	0.008
112	MA1020.1	GT-1	GTTAACCA	8	7264	0.04	112	MA1303.1	WRKY22	AAAAGTCAACKNH	13	3337	0.01
113	MA0563.1	2022-09-03	YCYWTTTTTGG	11	9926	0.041	113	MA1778.1	MYB80	KTYYACCTAMYTWWW	15	7470	0.012
114	MA0972.1	CCA1	AAATATCT	8	5246	0.043	114	MA1315.1	WRKY24	NCGTTGACTTTTTW	14	3728	0.014
							115	MA0563.1	2022-09-03	YCYWTTTTTGG	11	9187	0.014
							116	MA1205.1	AGL6	TTWCCAAAAAWGGAAAAWW	19	3503	0.018
							117	MA1316.1	WRKY71	AAAAGTCAACG	11	4032	0.02
							118	MA1189.1	AT5G61620	DWWWTGGATAAGRWW	15	6851	0.022
							119	MA1093.1	WRKY75	HRGTCAAC	8	4626	0.025
							120	MA2007.1	MYB107	HYCACCAAACHHH	13	8818	0.027
							121	MA1079.2	WRKY21	NDHAAAAGTCAACGNHDWNN	20	4312	0.03
							122	MA1408.1	FaEOBII	RGTTAGGTAN	10	8753	0.03
							123	MA0555.1	SVP	NWWWCCAAAAAWGGAAARAH	20	6170	0.039
							124	MA1204.1	AGL13	TTWCCAAAAAWRGWAAAW	18	2169	0.04
							125	MA1182.1	RVE8	AGATATTTTWDD	12	3159	0.04
