# Supplementary material for: Genome-wide identification of silencers and their regulatory mechanism in gene transcription in Arabidopsis
Source: Research Square preprint supplement (doi:10.21203/rs.3.rs-5559292/v1), 2025-01-13
Supplement: Supplementary file 8 [file deabd81aabf19cf4e10c7c1e.xlsx]

## Sheet: aragene_logrpkm
Supplementary Table 6 Expression levels of genes in 14- and 28-day-old leaves.
	14 day	28 day
Name	log2(RPKM+1)	log2(RPKM+1)
AT1G01010	2.9859	4.58678
AT1G01020	3.79529	4.19985
AT1G03987	0	3.99419
AT1G01030	1.06556	5.51061
AT1G01040	3.40742	4.56231
AT1G03993	2.91433	4.59245
AT1G01046	0	0.357209
AT1G01050	6.80285	6.12665
AT1G03997	0.240823	0.718636
AT1G01060	0.100829	0.633908
AT1G01070	2.10211	0.145931
AT1G04003	0	0
AT1G01080	6.77384	6.1826
AT1G01090	7.17562	6.72496
AT1G01100	7.96681	6.89037
AT1G01110	1.70249	1.74569
AT1G01120	5.42307	7.91098
AT1G01130	2.9559	2.32521
AT1G01140	6.3863	7.60963
AT1G01150	0.0571847	0.0608915
AT1G01160	5.636	5.03788
AT1G04007	5.33755	5.03069
AT1G01170	7.32419	6.72195
AT1G04013	7.44922	6.95851
AT1G01180	3.92688	3.36997
AT1G01183	0	0
AT1G01190	1.65353	3.28561
AT1G01200	1.80452	0.233462
AT1G01210	4.10977	3.51514
AT1G04017	3.51948	3.44617
AT1G01220	4.42721	3.50053
AT1G04023	4.26719	3.51226
AT1G01225	2.1257	1.76615
AT1G01230	5.61597	5.82665
AT1G01240	4.12812	3.15229
AT1G01250	2.6315	1.48402
AT1G01260	2.96066	5.29025
AT1G01270	0	0
AT1G01280	0	0
AT1G01290	3.45445	3.05749
AT1G01300	5.83222	6.63871
AT1G01305	0	0
AT1G01310	0.658945	0.480879
AT1G01320	7.07892	6.20254
AT1G01335	0	0
AT1G01340	2.61677	4.53551
AT1G01350	4.34223	4.92273
AT1G01355	0.191238	0.216762
AT1G01360	4.51864	4.59165
AT1G01370	1.70387	1.67029
AT1G01380	1.46426	0.419191
AT1G01390	3.23371	2.61908
AT1G01400	0	0.0832416
AT1G01410	0	0
AT1G01420	2.36709	2.8938
AT1G01430	5.44592	4.20654
AT1G01440	4.05889	3.63375
AT1G01448	3.50364	2.60701
AT1G01450	3.92895	2.95107
AT1G01453	0	0.0680673
AT1G01460	0	0.201496
AT1G01470	7.25449	9.18684
AT1G01480	0.736425	2.06016
AT1G01490	5.16597	5.28285
AT1G01500	4.72607	3.57624
AT1G01510	4.52583	3.67651
AT1G01520	0.207231	0.273341
AT1G01530	0.102224	0.217206
AT1G01540	5.95914	5.97753
AT1G01550	7.00119	8.15777
AT1G01560	3.42573	5.12628
AT1G01570	1.5658	1.9613
AT1G01580	0.335703	0.922493
AT1G01590	0.585212	0.318395
AT1G01600	0.113902	0.701467
AT1G01610	5.29695	5.29375
AT1G01620	7.5817	6.38583
AT1G01630	5.75574	5.22348
AT1G01640	2.2876	2.32411
AT1G01650	4.97897	6.85592
AT1G04027	3.17418	4.50914
AT1G01660	1.11939	1.29389
AT1G01670	1.97238	2.00486
AT1G01680	2.28107	2.09459
AT1G01690	1.67531	0.86921
AT1G01695	0.440098	0.202
AT1G04033	0.390394	0.224849
AT1G04037	2.65254	4.55945
AT1G01700	1.31343	2.31831
AT1G01710	5.41696	5.34723
AT1G01715	2.19796	2.45975
AT1G04043	0	0.39169
AT1G01720	4.52137	5.43845
AT1G01725	3.59917	3.60812
AT1G04047	3.11947	3.43058
AT1G01730	4.55568	4.58811
AT1G01740	2.71207	1.83971
AT1G01750	1.60325	1.11892
AT1G04053	1.31493	0.585291
AT1G01760	1.57428	1.46323
AT1G04057	1.39942	1.79403
AT1G01770	4.48022	3.07777
AT1G01780	3.8171	2.15776
AT1G01790	6.39745	7.04931
AT1G04063	0	0.365161
AT1G01800	6.70367	6.56832
AT1G01810	1.17077	0.968459
AT1G01820	6.39608	6.07981
AT1G01830	3.6938	2.3889
AT1G04067	2.69646	0.861189
AT1G01840	2.28848	0.898159
AT1G01860	4.29096	2.62995
AT1G04073	4.84563	1.60838
AT1G01870	0	0
AT1G01880	1.04526	0.9559
AT1G01890	0	0
AT1G01900	2.50859	3.11603
AT1G04077	2.81376	3.61104
AT1G01910	5.65272	5.21902
AT1G04083	6.50096	5.74234
AT1G01920	3.64407	3.34026
AT1G01930	3.87846	4.0005
AT1G01940	4.24689	4.2666
AT1G01950	3.27173	3.89739
AT1G01960	4.94079	4.86587
AT1G01970	5.40426	4.4247
AT1G01980	0	0
AT1G01990	4.71663	4.72424
AT1G02000	3.49003	4.40463
AT1G02010	2.82201	2.73939
AT1G02020	4.18205	3.56615
AT1G02030	0.1145	0.0952338
AT1G02040	0	0
AT1G02050	2.33084	1.92655
AT1G02060	2.28751	2.07549
AT1G02065	0	0
AT1G02067	0	0
AT1G02070	0.309193	0
AT1G02080	4.80351	4.94159
AT1G02090	4.89426	5.63216
AT1G02100	5.07022	6.03341
AT1G02110	3.87304	3.66042
AT1G02120	5.82857	6.31038
AT1G02130	5.51458	5.10468
AT1G04087	0	0
AT1G02140	7.31217	6.9209
AT1G02145	4.50686	4.04843
AT1G02150	6.83229	5.5462
AT1G02160	5.17489	4.8041
AT1G02170	5.27276	6.79831
AT1G02180	3.66737	2.49207
AT1G02190	0.277318	0.258403
AT1G02205	4.01895	2.29856
AT1G04093	0.551277	0
AT1G02210	0	0
AT1G02220	1.49083	1.98033
AT1G02230	0.905489	0.642366
AT1G02250	0.0696682	0
AT1G02260	4.20316	3.62376
AT1G02270	5.04335	5.66178
AT1G02280	6.49536	5.25923
AT1G02290	3.41304	2.19161
AT1G02300	5.20056	2.55908
AT1G02305	6.88659	5.99854
AT1G04097	7.0014	6.27943
AT1G02310	0.808513	0.770086
AT1G04103	0.526799	0.604743
AT1G02320	0	0
AT1G02330	4.66196	4.91099
AT1G02335	3.74996	4.31297
AT1G02340	0.729134	1.28866
AT1G02350	2.89265	0.690077
AT1G02360	2.23157	4.56092
AT1G02370	2.75566	1.21168
AT1G02380	1.47399	0.822179
AT1G02390	2.01865	2.97454
AT1G02400	0.853781	7.8179
AT1G02405	0.937469	3.6629
AT1G02410	4.42279	4.68524
AT1G02420	2.56387	2.57312
AT1G04117	1.66441	1.96117
AT1G02430	0.388711	0.455206
AT1G04123	1.23344	0.865761
AT1G02440	0.395667	0.283119
AT1G02450	4.12131	1.71181
AT1G02460	0.915551	2.28678
AT1G02470	1.95629	0.691534
AT1G02475	6.70644	6.31164
AT1G02480	0	0
AT1G02490	0.476031	0
AT1G02500	7.67876	8.4273
AT1G02510	0	0.0873764
AT1G02520	0.170084	1.24778
AT1G02530	0.062713	0.0253067
AT1G02540	0	0
AT1G02550	0	0
AT1G02560	8.61055	8.3525
AT1G02570	0.16209	0
AT1G02575	0	0
AT1G02580	0	0.0412823
AT1G04127	0	0
AT1G02590	0	0
AT1G02600	0	0
AT1G02610	2.52369	1.15665
AT1G02620	0.22716	0.139651
AT1G04133	0.173986	0.655734
AT1G04137	0	0
AT1G02630	0	0
AT1G02640	2.34725	2.32544
AT1G02650	0.698133	0.728037
AT1G02660	3.56706	5.37098
AT1G02670	1.03876	1.44112
AT1G02680	4.28755	3.77894
AT1G04143	0	0
AT1G02690	2.47579	1.80597
AT1G02700	1.49488	3.05813
AT1G02705	3.4575	6.47376
AT1G02710	4.08739	7.06289
AT1G02720	3.15263	3.42352
AT1G02730	2.6935	2.51282
AT1G02740	3.4812	3.71643
AT1G02750	4.15122	3.61292
AT1G02760	0	0
AT1G02770	0.640365	0.333009
AT1G02780	9.03667	8.28358
AT1G02790	0	0
AT1G02800	0.221904	0.401869
AT1G02810	0.235958	0.588757
AT1G02813	0	0
AT1G02816	3.72233	2.8977
AT1G02820	2.35836	0.579106
AT1G02830	0.162991	0
AT1G02840	6.00855	5.95629
AT1G02850	2.71915	3.53817
AT1G02860	3.54901	4.34695
AT1G04147	4.24556	5.10891
AT1G02870	5.06953	3.54706
AT1G04153	0.379098	0.185028
AT1G02880	4.23588	4.3904
AT1G02890	5.15227	6.10195
AT1G02900	1.23727	3.58175
AT1G02910	6.26795	6.35359
AT1G02920	5.55026	7.3543
AT1G02930	5.98228	8.77272
AT1G02940	0.498238	0.597255
AT1G02950	3.29676	3.83452
AT1G02952	3.65504	4.21969
AT1G02960	4.06329	3.94271
AT1G02965	0	0.175832
AT1G02970	2.19883	1.60627
AT1G02980	0	0.0400109
AT1G02990	2.92426	4.42822
AT1G03000	4.33369	3.49454
AT1G03010	1.63608	0.562636
AT1G03020	2.90952	4.88924
AT1G03030	4.10595	4.25857
AT1G03040	5.2361	5.75209
AT1G03050	0.191532	0.179066
AT1G03055	2.75573	2.23287
AT1G03060	3.25283	4.42275
AT1G03070	0.477927	2.58004
AT1G03080	3.8565	6.77277
AT1G03090	4.19822	4.28395
AT1G04157	5.13923	5.05481
AT1G03100	2.13198	2.05325
AT1G04163	2.32333	1.55868
AT1G03103	0	0.146582
AT1G03106	0	0
AT1G03110	3.65087	2.30076
AT1G03120	0.445387	0
AT1G03130	9.96381	8.30621
AT1G03140	5.42667	5.04235
AT1G03150	4.61705	4.04938
AT1G04167	0	0
AT1G03160	6.09403	6.08812
AT1G03165	2.56691	2.80945
AT1G04173	2.81789	2.5816
AT1G03170	0.371065	0.427166
AT1G03180	1.64101	1.04461
AT1G03190	2.93866	2.4492
AT1G04177	0	0
AT1G03200	2.85203	3.11097
AT1G03210	4.54423	4.64169
AT1G03220	6.22385	6.31485
AT1G03230	4.91168	4.50999
AT1G03240	0	0
AT1G03250	4.8402	5.10126
AT1G03260	3.71416	3.73333
AT1G03270	2.46108	0.947984
AT1G03280	4.48192	5.05337
AT1G03290	4.11844	4.24811
AT1G03300	2.09446	0.532234
AT1G03310	6.00772	4.51322
AT1G03320	0.50818	0.68132
AT1G03325	0.432872	0.47999
AT1G03330	5.39373	4.81874
AT1G03340	1.96973	0.915028
AT1G03350	5.14101	5.95536
AT1G03360	3.72573	2.41038
AT1G03365	3.4198	3.43808
AT1G03370	4.49646	6.0738
AT1G03380	4.22797	4.38464
AT1G03390	0.0599307	0.1304
AT1G03395	0	0
AT1G03400	5.96232	5.81627
AT1G03410	4.58928	3.9174
AT1G04183	4.83963	4.12863
AT1G03430	5.14579	5.26364
AT1G03440	3.46768	3.6987
AT1G03445	0.0303887	0.199039
AT1G03457	1.23924	0.831094
AT1G03470	2.03886	1.49065
AT1G03475	8.12396	7.72898
AT1G03490	0	0
AT1G03495	3.79838	3.89251
AT1G04187	4.47934	3.82852
AT1G04193	0	0
AT1G03502	0	0
AT1G03506	0	0
AT1G04197	0.781377	0.438459
AT1G03510	1.94686	1.61593
AT1G03515	0	0
AT1G03520	3.30999	3.00573
AT1G03530	3.15079	2.13765
AT1G03540	1.48546	1.91571
AT1G03550	3.49446	3.24761
AT1G03545	3.00575	2.90542
AT1G03560	2.60905	2.9152
AT1G03570	0	0
AT1G03590	3.13351	4.93049
AT1G03600	8.67163	7.62924
AT1G03610	4.59261	4.06639
AT1G03620	1.26401	0.797028
AT1G03630	8.23764	7.27728
AT1G03640	0	0
AT1G03650	3.17382	2.27816
AT1G03660	0.371449	0.499794
AT1G04203	1.50068	1.64914
AT1G03670	0	0.100815
AT1G03680	9.39983	9.03207
AT1G03687	3.85437	2.96883
AT1G03700	0	0
AT1G03710	0.379051	0.575098
AT1G03720	0	0
AT1G04207	0	0
AT1G03730	4.17564	5.75787
AT1G03740	4.7902	6.90254
AT1G04213	0.47269	3.65343
AT1G03743	0	0
AT1G03746	0	0
AT1G03750	2.24211	1.9533
AT1G03760	3.44553	2.54256
AT1G03770	1.30601	2.11596
AT1G03780	1.24175	0.921348
AT1G03790	0.275741	0
AT1G03800	0.11891	0.150055
AT1G03810	0	0
AT1G03820	2.30942	2.54041
AT1G03830	2.52229	1.43962
AT1G03840	0.718154	0.105178
AT1G03850	1.34471	1.12055
AT1G03860	6.13324	5.3231
AT1G03870	6.47424	4.62309
AT1G03880	0	0
AT1G03890	0	0
AT1G03900	6.65587	7.0434
AT1G03905	1.04494	3.1199
AT1G03910	4.85753	4.95748
AT1G03920	1.15655	0.919973
AT1G03930	5.18054	4.96379
AT1G04217	1.90834	1.39202
AT1G03935	1.66274	0.858618
AT1G04223	0.45434	0.503557
AT1G03940	3.0739	2.82786
AT1G04227	3.57683	3.4636
AT1G03950	4.6243	4.85946
AT1G03960	3.3712	3.0331
AT1G03970	5.01774	4.9962
AT1G04233	5.93616	5.80787
AT1G03980	0.486141	0
AT1G03982	0	0
AT1G03990	1.38027	2.29503
AT1G04000	4.37008	4.64695
AT1G04010	2.97615	2.8523
AT1G04020	3.79704	2.7077
AT1G04030	4.66745	3.8671
AT1G04040	7.2174	6.24962
AT1G04237	7.63369	6.54973
AT1G04050	1.20122	0.636853
AT1G04070	3.58706	4.53982
AT1G04080	5.68569	6.44515
AT1G04090	0.342805	0.627313
AT1G04100	2.4885	4.14075
AT1G04105	3.73445	5.20389
AT1G04110	0.825238	0.487877
AT1G04120	4.03506	5.61462
AT1G04243	0	0
AT1G04130	3.58399	4.19436
AT1G04140	5.74612	6.14577
AT1G04150	0	0
AT1G04160	2.23574	3.10748
AT1G04170	6.32103	5.69632
AT1G04180	0.383545	2.02516
AT1G04190	4.95287	4.14692
AT1G04200	4.15451	5.46349
AT1G04210	4.41761	4.74534
AT1G04220	1.39387	2.58106
AT1G04247	1.02357	2.49702
AT1G04230	4.45283	4.46144
AT1G04240	4.92285	4.95422
AT1G04253	0	0
AT1G04250	4.33149	2.4021
AT1G04260	3.90619	4.14928
AT1G04270	8.34316	7.05329
AT1G04280	3.01505	2.48671
AT1G04290	4.39481	4.22738
AT1G04295	5.41422	5.17995
AT1G04300	4.70638	5.35921
AT1G04310	2.54317	2.26985
AT1G04320	0	0
AT1G04330	0.69431	0.937345
AT1G04340	4.5986	4.61246
AT1G04350	5.21716	5.17145
AT1G04360	0.718765	1.39552
AT1G04370	0	0.247625
AT1G04380	0.257263	0.340383
AT1G04257	0	0.297548
AT1G04390	2.70809	2.79123
AT1G04400	7.23469	6.86238
AT1G04410	9.33166	8.67206
AT1G04420	7.46975	7.21873
AT1G04425	1.4252	1.49018
AT1G04430	6.25296	6.41565
AT1G04440	5.35134	5.98367
AT1G04445	0.0681081	0.231038
AT1G04450	0	0
AT1G04455	0.336762	0
AT1G04470	0	0.0543087
AT1G04263	0	0
AT1G04480	7.60045	6.6445
AT1G04267	0	0
AT1G04273	0	1.39202
AT1G04277	0.608808	0.462737
AT1G04490	0.42765	1.94776
AT1G04500	0.134716	0.178044
AT1G04510	5.4387	4.88563
AT1G04520	3.57065	2.10002
AT1G04530	5.65993	6.27547
AT1G04540	1.54827	1.15314
AT1G04550	4.17193	2.95415
AT1G04555	3.2348	3.55815
AT1G04560	0	0
AT1G04570	0.94676	2.43926
AT1G04580	0.405915	0.125946
AT1G04590	4.45561	3.74947
AT1G04600	0.665209	0.40826
AT1G04610	0.0994055	0.0553466
AT1G04620	5.86986	6.10559
AT1G04625	0	0.118551
AT1G04630	5.89239	5.68838
AT1G04635	2.00832	1.12834
AT1G04640	6.12697	5.16854
AT1G04645	0.314223	0
AT1G04650	1.6936	0.464067
AT1G04283	0	0
AT1G04660	0.223905	0.323311
AT1G04670	0	0
AT1G04680	6.0727	5.0007
AT1G04690	6.81429	6.32539
AT1G04700	0.478418	0.596131
AT1G04710	4.92748	4.7556
AT1G04720	0	0
AT1G04730	2.82112	1.85384
AT1G04750	6.25814	6.34439
AT1G04287	0	0
AT1G04760	5.89433	5.15228
AT1G04770	7.80821	7.14656
AT1G04778	0.55473	0.818122
AT1G04780	4.87586	5.52647
AT1G04790	5.06172	4.71242
AT1G04800	6.05281	5.12547
AT1G04810	4.82127	4.45852
AT1G04820	8.07293	8.1996
AT1G04830	3.93517	4.11792
AT1G04840	1.25303	1.28144
AT1G04850	5.84491	5.70365
AT1G04860	4.08006	4.50785
AT1G04870	4.87918	3.80941
AT1G04880	0.175572	0.341801
AT1G04890	0	0
AT1G04293	0	0
AT1G04895	0	0
AT1G04900	3.78869	2.86839
AT1G04297	3.36064	2.05612
AT1G04910	4.84003	5.01055
AT1G04303	5.591	5.84855
AT1G04920	1.05452	0.692789
AT1G04930	2.48056	3.62459
AT1G04945	2.55226	2.18673
AT1G04940	0.435822	0.159518
AT1G04950	4.36826	3.66647
AT1G04960	4.59075	5.02343
AT1G04970	4.5942	4.94932
AT1G04980	4.25827	4.75085
AT1G04985	4.67791	4.69138
AT1G04990	5.50319	4.74593
AT1G05000	0.886544	1.97894
AT1G05005	0	0.138384
AT1G04307	0	0
AT1G05010	8.08532	10.1474
AT1G05020	0.831993	3.04325
AT1G05030	3.91622	4.28601
AT1G04313	1.75846	2.66936
AT1G05035	2.01024	2.82546
AT1G04323	2.29249	2.87506
AT1G05040	0	0
AT1G05055	3.6819	3.27935
AT1G05060	4.92295	4.86627
AT1G05065	2.2686	1.26858
AT1G05070	5.25158	3.37996
AT1G05080	0	0
AT1G05085	0	0
AT1G04327	0	0
AT1G04333	0	0
AT1G05087	2.36159	2.8804
AT1G05090	1.05279	1.13348
AT1G05100	0.661573	4.45437
AT1G05120	3.6947	5.24729
AT1G05136	1.44735	2.24116
AT1G05140	6.44664	5.53492
AT1G05150	4.04342	4.03474
AT1G05160	3.30405	2.99037
AT1G05170	3.56568	4.02476
AT1G04337	0	0
AT1G05180	5.03171	4.8051
AT1G05190	9.12445	8.84741
AT1G05200	4.66913	4.22318
AT1G04343	5.86636	5.16213
AT1G05205	4.67443	4.50883
AT1G04347	4.80775	4.95823
AT1G05210	3.23279	3.40872
AT1G05220	0.381954	0.126832
AT1G04353	3.43281	3.34103
AT1G05230	3.00805	2.89552
AT1G05240	0	0
AT1G04357	2.50213	1.97331
AT1G04363	2.98299	2.85045
AT1G04367	0.40264	0.238892
AT1G05250	0	0
AT1G05260	0.136307	0
AT1G05270	5.12914	4.98334
AT1G05280	0	0
AT1G04373	0	0
AT1G05290	0	0
AT1G05291	0	0
AT1G04377	0	0
AT1G04383	0	0
AT1G04387	0	0
AT1G05300	2.9917	2.44904
AT1G05310	1.80197	2.20018
AT1G05320	3.59192	2.63208
AT1G05330	0	0.131229
AT1G05340	1.6774	6.11208
AT1G05350	4.775	5.64713
AT1G05360	3.09363	2.99546
AT1G05370	1.18744	0.848277
AT1G05380	3.88823	4.98516
AT1G05385	5.32808	4.13421
AT1G05390	0	0
AT1G05400	1.17491	1.16453
AT1G05410	3.52041	3.43999
AT1G05420	0.505438	3.48004
AT1G05430	5.21472	4.72147
AT1G05440	0.535803	0.391842
AT1G05450	0.220283	0
AT1G05460	2.88358	1.3748
AT1G05470	1.91205	1.76115
AT1G05490	0.181319	0.0655501
AT1G05500	5.03277	4.72885
AT1G05510	0.240418	0.85633
AT1G05520	4.72842	5.0804
AT1G05530	0.199368	0.0617013
AT1G05540	3.36587	3.09564
AT1G05550	0.26723	0.350148
AT1G05560	5.5174	4.35087
AT1G05562	5.44051	4.418
AT1G05570	4.15449	4.24154
AT1G04393	0	0
AT1G04397	0.624729	1.44586
AT1G05575	3.51377	5.39945
AT1G05577	0	0.650428
AT1G05580	0	0.0355109
AT1G05590	3.65049	3.09622
AT1G05600	2.60985	2.15114
AT1G05610	0.503813	2.05028
AT1G05615	0	0
AT1G05620	3.73594	4.20429
AT1G05630	4.02783	3.62726
AT1G05640	1.54649	1.76686
AT1G05650	0	0
AT1G04403	0	0
AT1G05660	0	0
AT1G05670	1.9707	1.95207
AT1G05675	1.64781	4.33613
AT1G05680	0.787079	0.569817
AT1G05690	1.91179	1.30578
AT1G05700	0	0.196773
AT1G04407	0	0
AT1G05710	1.93257	3.24077
AT1G05720	5.21683	4.86716
AT1G04413	4.40305	3.66948
AT1G05730	3.68134	3.33356
AT1G04417	0.332709	0.615632
AT1G05740	0	0
AT1G05750	2.95065	2.58676
AT1G05760	3.22914	3.42939
AT1G05770	1.57402	1.01832
AT1G05780	2.98724	3.1521
AT1G04423	1.72723	1.50762
AT1G05783	1.837	2.59772
AT1G04427	1.56585	3.17488
AT1G05785	2.41279	2.54789
AT1G05790	4.24571	3.95613
AT1G05800	0	2.83891
AT1G05805	5.93888	5.46439
AT1G05810	3.79316	4.04517
AT1G05820	1.38475	1.83969
AT1G05830	3.8563	4.12127
AT1G05835	2.64108	1.70405
AT1G04433	2.41477	1.63569
AT1G05840	4.79343	5.02656
AT1G04437	4.83007	5.00137
AT1G05850	8.87103	8.50773
AT1G05860	3.29053	2.60528
AT1G05870	3.482	1.93642
AT1G05880	0.0450761	0
AT1G05890	5.10245	5.00019
AT1G05894	0.348302	0.3488
AT1G05900	4.14589	3.8505
AT1G05910	3.60046	3.81264
AT1G05920	0	0
AT1G05930	0.0845486	0
AT1G05940	5.28467	4.91678
AT1G05950	1.87251	1.23771
AT1G05960	4.84792	5.53652
AT1G05970	3.17226	2.50486
AT1G05980	0	0
AT1G05990	0	0.334543
AT1G06002	5.75094	7.20764
AT1G06000	5.65127	7.28675
AT1G06010	3.84914	3.76569
AT1G06020	0.326483	0.518136
AT1G06030	0	0.0826669
AT1G06040	7.62881	4.82027
AT1G06045	9.08547	6.38943
AT1G06050	3.31166	2.58985
AT1G06060	4.88817	4.83903
AT1G06070	3.87507	4.29201
AT1G04443	0	0
AT1G06080	2.96102	0.066932
AT1G06090	0.315674	0.914251
AT1G06100	0	0
AT1G06110	4.46286	3.79711
AT1G06120	0	0
AT1G06130	5.22994	5.61039
AT1G06135	0	0.275207
AT1G06137	0	0
AT1G06140	1.18217	1.18637
AT1G06143	2.06557	1.81896
AT1G06150	3.87097	4.08942
AT1G06148	0.42967	0.428851
AT1G06160	2.05918	1.3455
AT1G06170	0.102396	0.451144
AT1G04447	0	0
AT1G06180	1.57373	1.02362
AT1G06190	6.33237	5.04286
AT1G06200	6.15065	5.87781
AT1G06210	4.55759	5.37237
AT1G06220	5.18096	4.61982
AT1G06225	0	0
AT1G06230	4.37295	5.1831
AT1G06240	4.6125	3.32447
AT1G06250	1.52206	0.956617
AT1G06265	2.67898	1.67794
AT1G06260	2.89563	2.42106
AT1G06270	2.12226	2.13668
AT1G06280	0	0.1392
AT1G06290	5.79016	5.79663
AT1G06310	0	0
AT1G06320	0	0
AT1G06330	0	0
AT1G06340	0.28817	0.118015
AT1G06350	0.0666201	0
AT1G06360	3.21686	1.10443
AT1G06380	3.57479	3.29174
AT1G06390	5.8936	5.77977
AT1G06400	5.4433	5.71036
AT1G04453	0	0.185737
AT1G06410	5.20954	6.19209
AT1G06420	0.45998	0.906208
AT1G06430	6.01233	5.7
AT1G06440	1.57648	1.86768
AT1G06450	5.66113	3.44042
AT1G04463	4.89533	2.46828
AT1G06460	9.23183	7.70303
AT1G04467	9.41835	7.99109
AT1G06470	4.52131	4.42193
AT1G06475	1.69015	3.90926
AT1G06480	0	0
AT1G06490	1.12467	1.85474
AT1G06500	4.61732	3.335
AT1G04473	4.82602	3.05667
AT1G06515	5.0871	4.63337
AT1G04477	4.60674	4.51681
AT1G06510	5.41836	5.19857
AT1G06520	0.63237	2.60224
AT1G06530	5.91033	5.71499
AT1G06540	5.41898	5.28296
AT1G06550	4.45849	5.48904
AT1G06560	3.85388	2.56824
AT1G04483	4.08053	2.373
AT1G06570	4.39194	3.91579
AT1G06580	1.7706	2.07529
AT1G06590	2.46953	2.54635
AT1G06610	0	0
AT1G06620	2.34604	7.70891
AT1G06630	3.70579	4.31072
AT1G06640	6.6002	7.65335
AT1G06645	4.54608	4.05165
AT1G04487	7.13308	6.79117
AT1G06650	6.66802	6.29498
AT1G06660	1.38231	1.46855
AT1G06670	3.74386	3.22846
AT1G06680	11.2719	10.5067
AT1G06690	6.01624	5.26223
AT1G06700	5.59966	5.44206
AT1G06710	2.10132	1.00315
AT1G04493	2.65236	0.679204
AT1G04497	2.30268	0.677243
AT1G06720	3.98985	2.23806
AT1G06730	3.7698	3.49728
AT1G06740	1.75175	1.39051
AT1G06750	0.0764194	0.172752
AT1G06760	7.22502	7.61842
AT1G04503	7.57687	7.8839
AT1G06770	2.70113	2.96859
AT1G06780	3.33557	3.83272
AT1G06790	3.54988	2.40365
AT1G04507	4.12107	1.75166
AT1G06800	3.18827	4.6062
AT1G04513	3.46295	4.42104
AT1G06810	0	0
AT1G06820	5.07124	4.8467
AT1G06830	5.20015	5.4259
AT1G06840	2.94167	3.68547
AT1G06850	3.93774	3.41841
AT1G04517	0	0
AT1G06860	0	0
AT1G04523	0	0
AT1G06870	4.2974	4.64754
AT1G04527	0	0
AT1G06880	0	0
AT1G06890	5.66337	5.47326
AT1G06900	4.6934	4.50686
AT1G06910	2.7343	1.64297
AT1G06920	0	0
AT1G06923	0	0
AT1G04533	0	0
AT1G06925	0	0
AT1G06930	0	0
AT1G06950	6.76076	6.01518
AT1G06960	4.08981	3.40226
AT1G06970	0.032609	0.201248
AT1G06980	2.12217	0.232966
AT1G06990	0	0
AT1G07000	5.00468	7.05149
AT1G07010	5.26216	5.30703
AT1G04537	5.10047	6.16714
AT1G07020	4.50051	5.44622
AT1G04547	0	0
AT1G07025	0	0
AT1G07030	4.74706	5.60233
AT1G07040	5.45574	4.57044
AT1G07050	7.14149	5.45019
AT1G07051	0.452265	0.827074
AT1G07060	0.396089	0.408588
AT1G04557	0	0.690006
AT1G07070	4.82517	2.98785
AT1G07080	6.77169	6.48634
AT1G07090	4.53305	4.72635
AT1G07100	0	0
AT1G07110	6.92031	6.46908
AT1G07119	1.33903	1.42519
AT1G07120	1.72374	1.79929
AT1G04563	0	0.613446
AT1G07128	2.79946	4.8583
AT1G07130	2.75582	4.75605
AT1G07135	6.06989	7.81838
AT1G07140	7.42131	7.4986
AT1G07150	1.85727	4.25569
AT1G07160	0.481921	1.76703
AT1G07170	3.87165	3.71347
AT1G07175	0	0
AT1G07180	3.26932	1.44231
AT1G07190	0	0
AT1G07200	3.7669	3.27395
AT1G07210	5.36004	4.40112
AT1G07220	4.01925	5.1272
AT1G04567	4.26733	5.52286
AT1G07230	5.16435	5.15329
AT1G07240	5.02653	6.09033
AT1G07250	5.83136	5.269
AT1G07260	1.42586	1.48518
AT1G07270	1.50861	1.00422
AT1G07280	7.32623	6.79907
AT1G04573	0	0
AT1G07290	1.10006	1.15442
AT1G07300	2.86039	2.15073
AT1G07310	5.19292	5.38321
AT1G07320	8.63616	8.11876
AT1G07330	0.331102	0.483385
AT1G07340	0	0
AT1G07350	5.59806	7.10426
AT1G07360	5.35847	5.55288
AT1G07370	4.79217	3.19413
AT1G07380	2.69268	2.0637
AT1G07390	1.46197	1.18815
AT1G07400	2.85552	6.58934
AT1G07410	2.18244	2.8473
AT1G07420	5.34791	3.77765
AT1G07430	1.46616	3.57617
AT1G07440	6.99458	6.14386
AT1G07450	1.29373	0.597001
AT1G07460	0	0
AT1G07470	3.31316	3.18361
AT1G04577	0.927196	0.633624
AT1G07473	0.161177	0.207274
AT1G04583	0.265677	0.853512
AT1G07476	0.335103	0.0991523
AT1G07480	3.17409	2.71717
AT1G04587	4.83795	4.40582
AT1G07485	3.33486	0.629693
AT1G07490	3.52341	0.729513
AT1G07510	3.66943	4.7425
AT1G07500	0	4.13856
AT1G07520	3.17432	3.25702
AT1G07530	4.25375	4.435
AT1G07540	0	0.0852776
AT1G04593	0	0
AT1G07550	0	0.0354818
AT1G07560	0.0320054	0.24615
AT1G07570	1.9973	3.08724
AT1G04597	0	0
AT1G07580	0	0
AT1G07590	2.84544	2.91916
AT1G07600	0	0
AT1G04603	0	0
AT1G07610	4.21356	3.22667
AT1G07615	3.08286	2.64989
AT1G07620	1.26358	2.5742
AT1G04607	0	0
AT1G07630	3.62669	4.98323
AT1G07640	3.90823	5.36767
AT1G07650	4.90524	5.90158
AT1G07645	0	0
AT1G07660	4.95674	5.4766
AT1G07670	4.52508	5.36311
AT1G07680	0	0
AT1G07690	0	0
AT1G07700	5.98663	5.59652
AT1G07705	4.25637	3.70038
AT1G07702	5.94492	5.27987
AT1G07710	0.53778	0.689722
AT1G07720	4.85704	5.53336
AT1G04623	0	0
AT1G07725	3.28387	3.75997
AT1G07728	3.27972	3.82387
AT1G07740	1.73675	1.55157
AT1G07730	0	0
AT1G07745	2.67723	2.11752
AT1G07747	0	0.280502
AT1G07750	4.61791	3.94695
AT1G07760	0	0
AT1G07770	6.97391	6.27798
AT1G07780	3.6996	2.66779
AT1G07790	5.39746	5.56141
AT1G07795	0	0.22378
AT1G07810	4.24587	4.67065
AT1G07820	6.14286	6.24459
AT1G07830	4.20088	3.15684
AT1G07840	4.21938	3.52875
AT1G07850	0.0428489	0.17905
AT1G07870	2.55274	3.20248
AT1G07860	0	0
AT1G07880	2.27185	3.06858
AT1G07885	0.831739	2.74279
AT1G07890	9.04371	9.31232
AT1G07900	1.0779	0.964522
AT1G07902	3.16089	2.63585
AT1G07901	4.64976	3.49698
AT1G07910	3.50601	2.77449
AT1G07920	6.70465	6.13619
AT1G07930	7.98711	7.3931
AT1G07940	6.02888	5.39792
AT1G07950	4.39082	4.36394
AT1G07960	4.3643	4.49643
AT1G07970	3.37478	2.39939
AT1G07980	3.78732	3.98303
AT1G07985	0.408926	0
AT1G07990	4.64596	5.12831
AT1G08000	3.12939	2.9496
AT1G08005	0.465618	0.389885
AT1G08010	4.00798	4.19195
AT1G08030	3.5544	3.12549
AT1G08035	0.0943117	0.109178
AT1G08040	4.84275	3.90598
AT1G08050	2.42558	5.75084
AT1G08060	2.79606	3.31689
AT1G08065	0	0
AT1G08070	1.67119	1.25316
AT1G08080	0.415609	0.687137
AT1G08090	1.10962	0.175758
AT1G08100	0	0
AT1G08110	6.89093	6.89856
AT1G08115	0	0
AT1G08120	0.596181	0.2608
AT1G04643	0.266225	0
AT1G08125	4.23439	3.68784
AT1G08130	4.55472	4.00187
AT1G08135	0	0
AT1G08140	0	0.0347219
AT1G08150	0	0
AT1G08160	3.16326	4.1765
AT1G08165	1.51449	1.43883
AT1G08170	0	0.104666
AT1G08180	2.27125	0.913599
AT1G08190	5.4461	5.84042
AT1G08200	7.38236	9.49268
AT1G08210	3.93529	4.1319
AT1G08220	2.95896	2.5398
AT1G08230	2.78114	4.65179
AT1G08240	0	0
AT1G08250	3.77321	6.21688
AT1G08260	2.96226	4.387
AT1G08270	2.8146	2.63029
AT1G08280	2.09864	2.64705
AT1G08290	1.10975	3.83934
AT1G08300	2.35364	3.40535
AT1G08310	0.189909	0.641416
AT1G08315	4.12673	5.24637
AT1G04647	4.16569	5.25775
AT1G08320	0.0569508	0
AT1G04653	0	0
AT1G08340	1.41204	1.1741
AT1G08350	2.88697	2.65684
AT1G08360	7.82105	6.74051
AT1G08370	4.79044	5.31264
AT1G08380	10.8723	9.9249
AT1G08390	3.80268	2.15498
AT1G08400	2.29643	2.14928
AT1G08410	3.84225	3.17739
AT1G08420	4.8447	5.41922
AT1G08430	0.175497	0
AT1G08440	0.0455521	0
AT1G08450	7.29611	8.26722
AT1G08460	4.65797	4.47598
AT1G08465	3.86427	3.22432
AT1G08470	4.50086	3.77901
AT1G08480	6.6049	6.22012
AT1G08490	5.96895	5.68048
AT1G08500	2.4377	3.04791
AT1G08510	6.79758	6.54568
AT1G08520	7.76701	7.16796
AT1G08530	4.29763	3.82873
AT1G08540	6.774	6.2066
AT1G08550	7.06645	5.69073
AT1G08560	3.41996	2.88088
AT1G08570	6.32644	5.41105
AT1G08580	5.47656	4.34696
AT1G08590	2.04267	1.87876
AT1G08592	2.25566	1.97184
AT1G08600	3.09339	2.8885
AT1G08610	3.21575	1.26448
AT1G04657	0.720618	2.86449
AT1G08620	3.26012	4.5616
AT1G08630	0.219452	0.316183
AT1G08640	7.09664	6.32572
AT1G08645	7.7761	8.05161
AT1G08650	6.83671	7.07103
AT1G08660	5.04861	4.16363
AT1G08670	0	0
AT1G08680	4.40193	4.06146
AT1G08695	0	0
AT1G08700	4.75048	4.46432
AT1G08710	3.4562	3.09136
AT1G08720	4.0793	5.00011
AT1G08730	0.232983	0.150551
AT1G08750	3.81694	3.23256
AT1G08760	3.32945	2.92278
AT1G08770	4.48703	5.08543
AT1G08780	4.80957	4.47299
AT1G08790	0	0
AT1G08800	2.82189	5.39981
AT1G08810	3.24986	3.44114
AT1G08820	4.22103	5.26709
AT1G04667	0	0
AT1G08830	7.90299	8.11039
AT1G08840	3.73916	3.56852
AT1G08845	3.51661	2.78082
AT1G08860	0.0385508	2.07115
AT1G08870	0	0
AT1G08880	6.78335	6.36896
AT1G08890	4.82018	3.76524
AT1G08900	5.17725	4.5188
AT1G08910	3.99841	3.59919
AT1G04673	0	0.341753
AT1G04677	0	0
AT1G04683	0	0
AT1G08920	4.33391	6.07425
AT1G08930	7.20333	9.28539
AT1G08940	2.58711	5.21098
AT1G08950	0	0
AT1G08960	3.38619	3.55038
AT1G08970	4.91625	4.81867
AT1G08980	7.0516	6.23365
AT1G08985	0	0.184735
AT1G08990	0	0
AT1G09000	1.65971	2.05545
AT1G09010	5.75338	4.54008
AT1G09020	5.19738	5.46963
AT1G09030	0	0
AT1G09040	1.78786	1.40767
AT1G09050	2.09623	2.03324
AT1G09060	4.60554	4.68557
AT1G09070	7.61271	9.55984
AT1G09080	2.3868	1.18626
AT1G09090	0.216588	0.245911
AT1G09100	4.76452	3.78584
AT1G09110	0	0.686415
AT1G09130	7.76454	7.49321
AT1G09140	5.70411	6.07872
AT1G09150	5.45695	4.81734
AT1G09155	0.0671775	0.160092
AT1G09157	0.0936109	0.108379
AT1G09160	4.37743	4.38911
AT1G09170	0.217879	0.0979447
AT1G09176	0	0.228112
AT1G09180	2.06797	3.29788
AT1G09190	2.47674	2.06248
AT1G09195	2.6633	3.29186
AT1G09200	7.00224	7.1499
AT1G09210	6.65759	5.49984
AT1G09220	1.54832	1.42351
AT1G09230	3.99007	2.63751
AT1G09240	1.58085	0.914683
AT1G09245	0	0
AT1G04687	0	0
AT1G04693	0	0
AT1G09250	4.53145	5.72095
AT1G09260	0	0
AT1G09270	5.42948	6.229
AT1G09280	3.94189	3.31471
AT1G09290	3.83095	2.05816
AT1G09300	3.65802	2.50836
AT1G09310	9.69117	8.68244
AT1G09320	3.06096	2.79119
AT1G09330	4.85954	5.22752
AT1G09340	9.22032	9.15129
AT1G09350	0.969205	2.62424
AT1G09360	0	0
AT1G09370	0	0
AT1G09380	0.136496	0
AT1G09390	3.57533	3.18247
AT1G04697	3.6119	2.83516
AT1G09400	0.836359	0.878178
AT1G09410	1.17477	1.14139
AT1G09415	5.41627	4.75708
AT1G09420	1.57473	2.05799
AT1G09421	2.62241	2.93386
AT1G09430	5.99106	6.2655
AT1G09440	3.00175	1.90357
AT1G09450	1.03388	0.448111
AT1G09460	0.923901	1.25493
AT1G09470	1.35973	1.27094
AT1G09480	1.17159	0.700379
AT1G09483	0	0
AT1G09490	5.55692	4.49695
AT1G09500	2.81852	2.06039
AT1G09510	0.507058	0.171668
AT1G09520	4.54448	4.53949
AT1G09530	3.81018	3.81027
AT1G04703	0	0
AT1G09540	0.163527	0.0656987
AT1G09550	0	0
AT1G09560	5.41073	7.16415
AT1G09570	4.29538	3.93296
AT1G09575	1.65746	3.0238
AT1G09580	4.32019	3.20577
AT1G09590	7.60507	6.80155
AT1G09600	0.0574915	0.216801
AT1G09610	1.41899	1.26404
AT1G04707	0.981655	0.941288
AT1G09620	6.05123	5.4874
AT1G09625	0	0
AT1G09630	4.53335	4.41861
AT1G09640	7.49217	7.06036
AT1G09645	4.79971	4.91139
AT1G09650	0.274499	0.0937884
AT1G04713	0.469818	0
AT1G09660	5.46297	3.56697
AT1G04717	0	0
AT1G09665	0	0
AT1G09680	1.85251	1.499
AT1G09690	8.19151	7.2409
AT1G09700	3.33424	2.72293
AT1G09710	3.00177	1.92508
AT1G09720	0	0
AT1G09730	4.24535	4.54753
AT1G09740	4.22062	3.64072
AT1G09750	7.71451	4.58879
AT1G09760	5.75376	4.95814
AT1G09770	5.69085	5.97139
AT1G09780	7.02601	7.10221
AT1G09790	0	0
AT1G09794	2.5613	3.40756
AT1G09795	7.34544	7.39128
AT1G04723	6.22831	6.245
AT1G09800	2.80411	1.25054
AT1G04733	0	0
AT1G09810	3.54528	2.11514
AT1G09812	0.878568	0.579232
AT1G09815	4.77712	5.47438
AT1G09820	2.21471	1.92951
AT1G09830	5.27272	4.26738
AT1G09840	4.78652	5.1386
AT1G09850	5.71959	5.24266
AT1G04737	5.13032	4.66032
AT1G09860	1.88519	0.877751
AT1G04743	0.0842258	0
AT1G09870	4.49654	4.52443
AT1G09880	0.391608	0.383324
AT1G04747	0	0
AT1G09890	1.22382	1.52082
AT1G09900	4.53192	2.9125
AT1G09910	3.65184	3.39689
AT1G09920	5.39743	5.61237
AT1G09930	0.301908	1.93584
AT1G09932	3.49615	7.46583
AT1G09935	0	0
AT1G09940	4.68447	7.80898
AT1G09950	1.0126	5.59515
AT1G09960	2.15857	3.87827
AT1G04753	0	0.275342
AT1G09970	5.76601	9.95479
AT1G09980	4.06185	4.67956
AT1G09995	2.22151	3.7697
AT1G10000	1.09347	0.729487
AT1G10010	0	0
AT1G10020	4.70577	2.61225
AT1G10030	3.82686	3.23687
AT1G10040	1.40904	2.72611
AT1G10050	2.95254	4.57636
AT1G10060	3.45282	2.81702
AT1G10070	2.44255	3.26135
AT1G10090	5.15155	6.63004
AT1G10095	2.03188	2.31766
AT1G10100	0	0.184095
AT1G04763	0	0.463344
AT1G10110	0.448872	0.864731
AT1G04767	0.363493	0.864716
AT1G10120	3.29567	4.30181
AT1G04773	2.65474	3.68748
AT1G10130	4.48772	4.59538
AT1G10140	3.04955	4.01754
AT1G10150	5.29637	4.27623
AT1G10155	4.92828	3.98567
AT1G10170	4.47702	4.88324
AT1G10180	3.57317	2.67159
AT1G10190	0	0
AT1G10200	7.13758	5.07953
AT1G10210	3.51489	3.79026
AT1G10220	0.306897	0
AT1G10225	0.246948	0.163336
AT1G10230	5.26036	5.17001
AT1G10240	2.63479	2.04376
AT1G10250	0	0
AT1G04783	0	0
AT1G10270	3.08681	2.70573
AT1G10280	2.47852	2.56628
AT1G10290	5.54163	6.3944
AT1G10300	0	0.0907162
AT1G10310	5.10953	4.91786
AT1G10320	3.20632	3.70402
AT1G10330	1.11689	1.61231
AT1G10340	3.33127	6.30328
AT1G10350	4.16322	4.27029
AT1G10360	6.92915	6.84658
AT1G10370	2.10512	8.70787
AT1G10380	2.69343	4.28288
AT1G10385	0	0.0432949
AT1G04787	0	0
AT1G10390	5.16883	5.76771
AT1G10395	5.248	5.95209
AT1G10400	0	0
AT1G10410	4.12851	5.4096
AT1G04793	0	0
AT1G10417	0.838385	1.24043
AT1G10430	5.09918	5.15425
AT1G10440	0	0
AT1G10450	3.66927	2.99812
AT1G10455	0	0
AT1G10460	1.34402	1.7502
AT1G10470	6.47831	6.89911
AT1G10480	0	0
AT1G10490	4.82	4.00157
AT1G10500	7.13407	7.06096
AT1G10510	5.86104	5.42892
AT1G10520	1.2198	0.626958
AT1G10522	5.24642	3.57176
AT1G04797	1.0279	0
AT1G10530	0.838426	1.051
AT1G04803	0.48106	1.12344
AT1G10540	0.33294	0.139194
AT1G10550	0.911339	0.162231
AT1G10560	1.6153	4.52179
AT1G10570	4.47565	3.51197
AT1G10580	4.70867	7.27816
AT1G10585	1.80515	7.37973
AT1G10586	0	0.476831
AT1G10588	0	0
AT1G10590	6.97562	7.26271
AT1G10600	4.79283	4.09937
AT1G10610	2.99731	2.44441
AT1G10620	0	0
AT1G10630	6.27592	6.66212
AT1G04807	0	0.15283
AT1G10640	1.70129	0.378687
AT1G10650	3.63105	4.62729
AT1G04813	0	0
AT1G10657	4.78476	3.39383
AT1G10660	4.54694	4.53613
AT1G10670	7.0862	7.21004
AT1G10680	0.0452728	0
AT1G10682	4.78676	2.55498
AT1G10690	2.42734	2.51532
AT1G10700	5.13296	6.23407
AT1G10710	0.869202	0.268693
AT1G10715	0	0
AT1G10717	0	0
AT1G10720	3.86105	5.31708
AT1G10730	3.21707	3.40527
AT1G10740	4.24951	3.46918
AT1G10745	0	0
AT1G10747	0.166065	0.189826
AT1G10750	1.04931	0.983256
AT1G04817	0	0
AT1G10760	8.62093	7.22879
AT1G10770	2.00091	1.2935
AT1G10780	1.94047	1.05707
AT1G10790	1.0313	0.704052
AT1G10800	0.590453	1.07759
AT1G10810	0.781112	0.657273
AT1G10820	4.61361	3.60519
AT1G10830	5.14839	4.79773
AT1G10840	6.44115	5.6154
AT1G04823	2.04306	1.40034
AT1G10850	2.64424	1.72642
AT1G10865	4.87333	5.8697
AT1G04827	2.82591	3.57122
AT1G10870	3.70618	3.85821
AT1G10875	0	0
AT1G10880	0.0618178	0
AT1G10890	5.37142	5.9465
AT1G10900	4.06176	4.5682
AT1G10910	5.02436	4.23827
AT1G10920	3.39621	3.45566
AT1G10930	3.83244	3.14051
AT1G10940	5.91113	6.18422
AT1G10950	6.32657	6.55562
AT1G10960	8.71377	8.62762
AT1G10970	2.9571	1.88374
AT1G10980	0	0.100022
AT1G10990	2.64384	1.52549
AT1G11000	2.42135	3.19972
AT1G11010	0	0
AT1G11020	3.91076	4.0845
AT1G11030	0	0
AT1G11040	0	0.427736
AT1G11050	4.60211	5.7896
AT1G04833	4.59435	5.80805
AT1G11060	3.31635	3.38816
AT1G11070	0.360187	0.144209
AT1G11080	0	0.0427477
AT1G04837	4.43172	3.00344
AT1G11090	4.49262	3.58494
AT1G11100	0.20705	2.2658
AT1G11110	0	0
AT1G11112	0.425448	0
AT1G11120	1.3358	0.91813
AT1G11125	0.480701	0.749802
AT1G11130	3.92276	2.19985
AT1G11145	0	0
AT1G11160	0.881405	0.331014
AT1G11170	1.7447	1.32696
AT1G11175	4.17717	4.01676
AT1G11180	5.19277	4.35456
AT1G11185	1.20389	2.8343
AT1G11190	1.47242	2.38656
AT1G11200	4.34524	4.7377
AT1G11210	5.82414	7.27045
AT1G11220	1.36089	2.17255
AT1G11230	0.0662244	0
AT1G11240	4.00487	3.42015
AT1G11250	0.0557696	0.064965
AT1G11260	6.07937	7.95883
AT1G11270	2.39082	2.19822
AT1G11280	3.64687	3.67654
AT1G11290	3.38462	1.87407
AT1G11300	1.22662	0.583464
AT1G11303	2.97221	2.77383
AT1G11310	7.43922	6.57385
AT1G11320	2.09942	1.62384
AT1G11330	5.08507	5.3374
AT1G11340	1.56401	2.43163
AT1G11350	5.32834	4.63158
AT1G11360	4.35207	3.97043
AT1G11362	0	0
AT1G11370	0	0
AT1G11380	3.41741	2.52866
AT1G11390	3.34372	5.16751
AT1G11400	3.30128	4.15606
AT1G04847	0.208463	0
AT1G11410	3.78274	2.9133
AT1G11420	1.21423	0.470528
AT1G11430	7.7287	6.81465
AT1G11440	4.3698	5.05891
AT1G11450	0.953727	0.490296
AT1G11460	0	0
AT1G11470	0	0
AT1G11475	5.57779	4.59501
AT1G11480	5.20556	5.79068
AT1G11490	0.464201	0.266813
AT1G11500	0.560469	0.61426
AT1G11510	0	0
AT1G11520	0	0
AT1G11530	6.31397	5.2173
AT1G04853	6.92791	5.9391
AT1G11540	0.702265	0.615004
AT1G11545	4.61168	2.96212
AT1G11550	0	0
AT1G11560	0.0674156	0.384396
AT1G11570	1.07	1.56368
AT1G11572	0	0
AT1G11580	4.77292	6.59451
AT1G04857	0	0
AT1G11590	0	0.0580676
AT1G11591	2.63499	2.59186
AT1G11592	2.8876	2.46682
AT1G11593	0	0
AT1G11600	0	0
AT1G11608	0	0
AT1G11610	0	0
AT1G11620	0	0
AT1G11630	3.21384	3.6617
AT1G11640	0.570141	0.920003
AT1G11650	8.05508	7.78511
AT1G11655	0	0
AT1G11660	4.73531	4.81276
AT1G11670	1.95669	6.5525
AT1G04863	0	0
AT1G11680	5.72599	4.9104
AT1G11684	0	0
AT1G11690	0	0
AT1G04867	0	0
AT1G11700	3.67973	1.91547
AT1G11710	1.12433	1.28752
AT1G11720	5.03675	5.06604
AT1G04873	5.12397	5.96377
AT1G11730	1.14516	1.08623
AT1G04877	1.40104	0.957261
AT1G11735	2.05446	0.502799
AT1G11740	0.605714	0.136145
AT1G11750	7.35117	7.03773
AT1G04883	0.785247	0.740197
AT1G11755	4.47724	3.25685
AT1G11760	2.92129	3.34881
AT1G11765	0	0
AT1G11770	0.142662	0.218472
AT1G04887	0	0
AT1G11780	3.58557	3.61958
AT1G11785	1.05378	0.759298
AT1G11790	4.97475	5.48944
AT1G11800	3.25502	3.0627
AT1G11810	0.725142	0.355609
AT1G11820	4.57018	4.15572
AT1G04893	4.06118	3.32306
AT1G11840	8.01581	7.61988
AT1G11850	3.39792	1.81421
AT1G11860	9.68258	9.43181
AT1G11870	5.13978	4.50932
AT1G04897	0	0
AT1G04907	0.393187	0
AT1G11880	2.85327	2.45421
AT1G11890	5.97982	6.61137
AT1G04913	5.33241	5.7433
AT1G11900	2.35086	1.95049
AT1G04917	2.86851	2.3503
AT1G11905	3.43344	4.37483
AT1G11910	7.87584	7.34185
AT1G11915	0.761466	1.40486
AT1G11920	0	0.0736117
AT1G11925	0.660106	2.70637
AT1G11930	6.4334	6.24971
AT1G11940	2.86802	3.36132
AT1G11950	1.9756	2.26242
AT1G11960	3.83795	6.67708
AT1G11970	0	0
AT1G11980	0	0
AT1G11990	0.469182	0.265488
AT1G12000	5.61114	5.33557
AT1G12010	2.32974	1.63601
AT1G12013	0	0
AT1G12015	0	0
AT1G12020	3.27264	2.72691
AT1G12030	1.69478	1.66546
AT1G04923	0	0
AT1G12040	0	0
AT1G12050	5.85041	5.01021
AT1G12060	3.56984	2.84401
AT1G12064	0	0
AT1G12070	0	0.0857781
AT1G12080	3.3439	3.72916
AT1G12090	9.88257	6.1524
AT1G12100	0.555167	0.193432
AT1G12110	6.48766	6.87079
AT1G12120	5.71357	5.11259
AT1G12130	0	0.0647625
AT1G12140	5.42041	5.73371
AT1G04927	5.53656	5.78844
AT1G12150	1.39349	1.60524
AT1G04933	0.339273	0.4839
AT1G12160	1.68818	1.22255
AT1G12170	0	0
AT1G12180	0	0
AT1G12190	0	0
AT1G12200	3.62205	4.08963
AT1G12210	2.08849	2.10129
AT1G12211	1.81548	2.03315
AT1G12220	3.67057	3.18199
AT1G12230	6.19268	5.95392
AT1G12240	7.42892	9.42447
AT1G12244	4.27832	3.20211
AT1G12250	6.69311	6.51723
AT1G12260	0.819334	1.77372
AT1G04937	0	0
AT1G12270	5.3196	4.78738
AT1G12280	4.35245	2.60377
AT1G12290	1.27523	1.63604
AT1G12294	0	0
AT1G12300	1.5077	0.621987
AT1G12320	4.95217	4.79322
AT1G12310	6.02428	5.84833
AT1G04943	0	0
AT1G04947	0	0.254614
AT1G12330	3.76048	2.89231
AT1G12340	0.231448	0.384959
AT1G12350	4.24451	3.90872
AT1G12360	5.14292	6.45015
AT1G12370	2.06039	1.34309
AT1G12380	2.59621	2.3274
AT1G12390	3.97745	4.24466
AT1G12400	4.20113	3.67564
AT1G12410	7.85226	7.50662
AT1G12411	0	0
AT1G12420	2.75691	5.28284
AT1G12430	4.00044	4.03466
AT1G12440	5.81216	5.59764
AT1G12450	3.76301	3.61729
AT1G12460	2.83554	2.55206
AT1G12470	4.56746	4.95089
AT1G12480	3.01698	2.04057
AT1G04953	3.41284	2.04264
AT1G12490	0.342115	0
AT1G04957	0	0
AT1G12500	5.32403	4.37629
AT1G12510	0	0
AT1G12520	5.97559	4.64458
AT1G12530	4.22663	3.4514
AT1G12540	0	1.19467
AT1G12550	3.63082	3.86074
AT1G12560	0	0
AT1G12570	1.00371	0.0446895
AT1G12580	4.70035	4.94944
AT1G12590	0	0
AT1G12600	0.511259	1.1252
AT1G04963	0	0
AT1G12610	0	4.91273
AT1G12615	0	0
AT1G12620	2.05477	2.85227
AT1G12630	0	0
AT1G12640	4.98793	5.12679
AT1G12650	4.49422	3.69353
AT1G12660	0	0
AT1G12663	0	0
AT1G12665	0.416043	0
AT1G12672	0.876028	0
AT1G12680	4.11016	4.33496
AT1G12700	1.90231	1.40654
AT1G12710	5.81369	3.42567
AT1G12730	4.24209	2.4228
AT1G04967	0	0
AT1G12740	0	0.0497851
AT1G12750	3.85542	4.55555
AT1G12760	5.52608	6.93368
AT1G12770	5.63058	4.63064
AT1G12775	1.85252	1.31095
AT1G12780	5.47359	4.62957
AT1G12790	2.41561	2.04264
AT1G12800	7.41214	6.76999
AT1G12805	0	0
AT1G12810	5.11061	5.4984
AT1G04973	4.50834	4.77798
AT1G12820	5.4914	5.10911
AT1G04977	6.09718	5.47536
AT1G12840	6.73034	6.48892
AT1G12830	4.04416	4.15487
AT1G12845	4.8248	2.15048
AT1G12850	5.31674	5.13213
AT1G12855	0.0603437	0.184887
AT1G12860	4.60715	2.3948
AT1G12870	0	0.602986
AT1G12880	3.78159	5.30969
AT1G04983	0	0
AT1G12890	0.1187	1.76663
AT1G12900	10.5694	9.61749
AT1G12910	5.24098	4.64328
AT1G12920	6.10962	5.89709
AT1G12930	3.74816	2.8856
AT1G12940	0.0852194	0.257356
AT1G12950	0.174981	0.460504
AT1G12960	0	0
AT1G12970	3.44292	3.68697
AT1G12980	0	0
AT1G12990	4.88077	4.44682
AT1G13000	4.27405	4.69399
AT1G13010	0	0.681382
AT1G13020	4.68173	5.59699
AT1G13030	3.11921	1.87371
AT1G13040	2.2872	2.23639
AT1G13050	2.25046	2.11403
AT1G13060	6.46864	6.18344
AT1G04987	0	0
AT1G13080	3.7162	2.85016
AT1G13090	6.44952	5.35357
AT1G13100	3.38488	3.58042
AT1G13110	6.97474	7.59119
AT1G13120	3.83956	3.43521
AT1G13130	0.222939	0.68253
AT1G13140	0.851626	0.364481
AT1G13143	0.892596	0.565877
AT1G13150	0.841737	0.431381
AT1G13160	4.27903	3.8131
AT1G13170	4.11744	3.74101
AT1G13180	3.47345	4.08188
AT1G13190	4.9505	6.34639
AT1G13195	3.4895	4.02568
AT1G13200	0	0
AT1G13210	5.84443	7.31076
AT1G13220	2.85039	3.51994
AT1G13230	0	0.0609987
AT1G13240	0	0
AT1G04993	0	0
AT1G13245	5.75109	4.98853
AT1G04997	0.356529	0
AT1G13250	4.38861	3.11591
AT1G05003	0	0
AT1G13260	6.94075	6.88102
AT1G13270	6.94685	6.08265
AT1G13280	6.01833	5.62741
AT1G13290	0	0
AT1G13300	0.0678408	0
AT1G13310	0.0528663	0.463405
AT1G13320	5.5783	5.58258
AT1G13330	2.62218	3.67999
AT1G13340	2.29228	4.77676
AT1G13350	4.54444	4.91677
AT1G13360	5.0756	6.66614
AT1G05007	0	0
AT1G13370	1.1734	1.52669
AT1G13380	5.4013	4.75602
AT1G13390	4.83417	6.13123
AT1G13400	0.0832472	0
AT1G13410	1.61725	1.56813
AT1G13420	0.925794	1.48492
AT1G13430	1.11015	0.293653
AT1G13440	9.52449	8.59527
AT1G05013	0	0
AT1G13448	3.7335	2.05327
AT1G13450	4.62024	4.55374
AT1G13460	3.60036	4.5762
AT1G13470	6.05931	5.58921
AT1G13480	0	0
AT1G13485	0	0
AT1G13490	0	0
AT1G13500	0	0
AT1G13510	0	0
AT1G13520	0	0.124542
AT1G13530	0.457121	0.498688
AT1G13540	0.41918	0.552191
AT1G13550	0.328222	1.27392
AT1G13560	6.03049	6.59249
AT1G13570	3.35887	3.32249
AT1G13580	2.9257	2.58031
AT1G13590	0	0
AT1G13600	0.43846	0
AT1G13605	0	0
AT1G13607	0	0
AT1G13608	0.12217	1.38004
AT1G13609	2.12803	6.05265
AT1G13610	0	0
AT1G13620	0.099867	0.236285
AT1G13630	1.30032	1.44505
AT1G13635	0.280413	0.268857
AT1G13640	4.97653	4.96891
AT1G13650	3.46038	1.00131
AT1G13670	1.13919	0.0768915
AT1G13680	0.196008	0
AT1G13690	4.78152	4.74079
AT1G05017	5.22733	4.98002
AT1G13700	3.77106	0.771161
AT1G05023	4.64187	0.449333
AT1G05027	0	0
AT1G13710	0	0
AT1G13720	0	0
AT1G13730	4.30622	2.69763
AT1G13740	3.24064	2.65552
AT1G05033	3.58205	3.28228
AT1G13750	4.7173	4.04088
AT1G13755	0	0
AT1G13760	0	0
AT1G13770	3.63545	3.13398
AT1G13780	2.85767	2.45391
AT1G13790	1.9839	2.80713
AT1G13800	0.947504	0.59255
AT1G13805	2.82074	1.12654
AT1G13810	3.32473	2.54074
AT1G13820	6.35754	5.57225
AT1G13825	0	0.127342
AT1G13830	0.605934	0.218211
AT1G13840	0	0
AT1G13850	0	0
AT1G13860	4.00506	2.76359
AT1G13870	3.93861	4.37457
AT1G13880	4.35926	5.34865
AT1G13890	0	0.0894981
AT1G13900	4.40537	4.62603
AT1G13910	2.72685	1.33626
AT1G13920	2.80574	1.86516
AT1G13930	9.96487	7.05571
AT1G13940	3.19119	2.31993
AT1G05037	0	0
AT1G13950	4.98509	4.63042
AT1G13960	3.69945	5.03761
AT1G13970	1.13365	0.694832
AT1G13980	4.03132	4.3936
AT1G13990	6.17276	6.38498
AT1G14000	5.92216	7.35953
AT1G14010	5.70817	6.15391
AT1G05043	1.68031	2.35676
AT1G14020	3.84277	4.03542
AT1G14030	6.10539	4.26131
AT1G05047	6.75786	5.13706
AT1G14040	2.02684	1.72537
AT1G14048	0	0
AT1G14060	4.00018	3.18663
AT1G14071	3.16957	2.55229
AT1G14080	0	0.106423
AT1G14100	0.741122	0.24945
AT1G14110	0	0
AT1G05053	0	0
AT1G14120	0.0616761	2.45642
AT1G14130	3.09958	5.47252
AT1G14140	4.62704	4.1752
AT1G14150	7.73576	7.23049
AT1G14160	4.607	3.63866
AT1G05057	0	0
AT1G14170	4.40623	4.40511
AT1G14180	2.45173	1.98428
AT1G14185	0.0446651	0.0521271
AT1G14190	1.52202	0.718114
AT1G14200	7.09081	5.54683
AT1G14205	4.62463	3.32706
AT1G14210	4.57782	3.59144
AT1G14220	0	0.0995059
AT1G14230	4.16545	3.87797
AT1G14240	0.325754	0.727693
AT1G14250	7.94892	7.35942
AT1G14260	1.2565	2.90043
AT1G14270	6.18552	5.4118
AT1G14280	4.68692	2.90851
AT1G14290	4.49719	3.63405
AT1G14300	4.07769	3.46491
AT1G14310	4.6469	4.19167
AT1G14315	0.712116	0.345344
AT1G14320	8.6626	7.48394
AT1G14330	2.85978	4.85358
AT1G14340	5.06294	3.18814
AT1G14345	7.53383	5.37913
AT1G05067	0	0
AT1G05073	0	0
AT1G14350	3.38086	2.87781
AT1G14360	5.42725	5.62506
AT1G14370	4.37466	6.30376
AT1G05077	5.10364	6.70618
AT1G14380	4.28211	2.70523
AT1G05083	2.95336	1.30122
AT1G14390	0.595537	0.50875
AT1G14400	6.38397	6.67538
AT1G14410	4.89442	3.80674
AT1G14420	0	0
AT1G14430	1.58084	0.800174
AT1G14440	1.99286	1.43557
AT1G14450	6.27475	6.04677
AT1G14453	6.65298	6.18792
AT1G14455	0	0
AT1G14460	3.26089	2.45608
AT1G05093	1.07206	0.59388
AT1G14470	1.7872	1.73003
AT1G14480	2.18113	3.24378
AT1G14490	0.289963	0.340425
AT1G14500	0.0594468	0
AT1G14510	4.84922	5.00962
AT1G14518	0	0
AT1G14520	2.98811	3.62271
AT1G14530	3.07881	3.28274
AT1G14540	0.354001	3.15343
AT1G14550	0	0
AT1G14560	3.65511	4.4073
AT1G14570	5.64776	5.20242
AT1G14580	3.66717	2.69548
AT1G05097	0	0
AT1G05103	0.223457	0
AT1G05107	0.217857	0
AT1G14590	3.4581	4.81268
AT1G14600	2.91676	2.3152
AT1G14610	5.47424	5.15193
AT1G14620	4.6968	3.34617
AT1G14630	1.19263	1.41896
AT1G14640	2.24958	3.32605
AT1G14642	3.03942	4.25725
AT1G14650	4.7269	4.73487
AT1G14660	2.68184	2.73554
AT1G05113	0	0
AT1G14670	6.35992	7.20713
AT1G14680	1.6853	1.74043
AT1G14685	5.09461	4.85788
AT1G14686	0	0
AT1G14687	1.9637	1.5933
AT1G14688	0.131971	0.139577
AT1G05117	0	0
AT1G14690	4.58489	3.29503
AT1G14700	4.27051	3.50949
AT1G14710	5.34871	6.07091
AT1G14720	6.02537	4.80567
AT1G14730	1.80337	2.39595
AT1G14740	5.13824	7.1164
AT1G14750	0.390583	1.43672
AT1G14755	0	0
AT1G14760	0	0.114068
AT1G14770	2.03413	1.97465
AT1G14780	0.0709478	4.92147
AT1G14790	4.08474	3.59296
AT1G14800	1.16396	0.800619
AT1G14810	6.64147	6.21096
AT1G05123	6.06602	5.30956
AT1G14820	4.17296	3.22299
AT1G14830	5.46355	6.46834
AT1G14840	4.18618	3.21059
AT1G14850	3.55551	3.16643
AT1G14860	0.11501	2.28042
AT1G14870	1.39598	5.48554
AT1G05127	0	0
AT1G14880	7.74482	7.26755
AT1G14890	4.15511	6.02676
AT1G14900	2.65018	2.97623
AT1G14910	5.13848	5.04428
AT1G05133	0.124243	0.152971
AT1G14920	5.03476	5.76267
AT1G14930	0	0.12935
AT1G14940	0	0
AT1G14950	0	0
AT1G14960	0	0
AT1G14970	2.79295	1.81553
AT1G14980	6.19573	5.81203
AT1G14990	4.57498	4.08871
AT1G15000	4.60592	3.62217
AT1G15002	4.38845	3.20208
AT1G05137	0	0
AT1G15010	1.72541	7.76546
AT1G15015	0	0
AT1G15020	3.46566	3.18185
AT1G15030	5.04848	5.4855
AT1G05143	5.00254	5.13241
AT1G15040	2.03315	1.90716
AT1G05147	0.380461	0.777169
AT1G15050	0	0
AT1G15060	3.9096	4.01597
AT1G15080	2.57101	1.16295
AT1G15090	0.6005	0
AT1G05153	0	0
AT1G15085	1.47743	2.53519
AT1G15100	3.2732	4.10163
AT1G15110	2.1727	1.55769
AT1G15120	6.61307	6.27711
AT1G15125	6.16106	2.97687
AT1G15130	5.435	5.98104
AT1G15140	7.55073	7.23345
AT1G15150	0.583576	0.353762
AT1G15160	2.77901	2.54164
AT1G15165	3.20373	3.4654
AT1G15170	3.18155	3.33216
AT1G15175	3.09745	2.0655
AT1G15180	4.84635	3.7508
AT1G15190	0.191459	1.62432
AT1G15200	4.97629	5.08222
AT1G15210	0	0.0221033
AT1G15215	3.61359	1.9846
AT1G15220	3.21568	3.34841
AT1G15230	4.95214	4.39522
AT1G15240	4.11077	4.27294
AT1G15250	5.29587	3.54262
AT1G15260	5.65704	3.34513
AT1G15270	7.55168	7.4237
AT1G15280	5.40739	5.3308
AT1G15290	5.33857	4.05949
AT1G15310	1.76817	2.369
AT1G15320	0	0.185332
AT1G15330	0.0655813	0
AT1G15340	5.68978	5.78592
AT1G15350	4.17325	5.26416
AT1G15360	0	0
AT1G15370	5.28256	5.48791
AT1G15380	0.957966	0
AT1G15385	0	0.142574
AT1G15390	5.26921	4.26213
AT1G15400	5.30974	5.11394
AT1G05163	0.73239	0.737495
AT1G15405	0	0
AT1G15410	3.77346	2.82867
AT1G15415	2.05057	2.83645
AT1G15420	3.83795	5.08321
AT1G15430	3.40529	5.65783
AT1G15440	3.75727	3.26416
AT1G15450	0	0
AT1G15460	0	0.0361998
AT1G15470	4.31131	3.99714
AT1G15480	3.222	1.78739
AT1G15490	2.8085	2.37219
AT1G15500	6.94955	6.21129
AT1G15510	3.63933	2.05227
AT1G15520	1.40797	1.69272
AT1G15530	3.86749	4.85128
AT1G15540	0.0580409	0.126561
AT1G15550	2.57248	0.726646
AT1G05173	0	0
AT1G15570	2.4316	2.91416
AT1G15580	2.04701	4.37802
AT1G15590	0	0
AT1G15600	0	0
AT1G15610	0	0
AT1G15620	0.160146	0.35442
AT1G15625	0.466869	1.02209
AT1G15630	0	0
AT1G15640	0	0
AT1G15650	0	0
AT1G15660	3.2715	2.66488
AT1G15670	3.5034	4.30853
AT1G15680	0	0
AT1G05177	0	0
AT1G15690	9.1749	7.46893
AT1G05183	2.23001	2.02824
AT1G15700	2.12593	2.05874
AT1G15710	4.44118	4.71465
AT1G15720	1.9744	2.35266
AT1G05187	1.6054	2.47283
AT1G15730	5.89215	5.24765
AT1G05193	0	0
AT1G15740	5.8024	4.34388
AT1G15750	5.28135	5.77522
AT1G05197	0	0.610086
AT1G15757	0	0
AT1G15760	0.76589	0.929178
AT1G15770	0	0
AT1G15772	0	0
AT1G15780	4.14679	4.73117
AT1G15790	3.70482	4.00098
AT1G15800	3.16521	4.97099
AT1G15810	6.19153	4.42486
AT1G05203	5.11187	4.29
AT1G15820	11.2948	9.17462
AT1G05207	12.3042	10.1613
AT1G15830	2.61486	1.2024
AT1G15825	3.07379	1.94834
AT1G15840	0	0
AT1G15850	0	0
AT1G15860	5.02383	5.06526
AT1G15870	2.1747	1.13235
AT1G15880	5.20728	5.37166
AT1G15885	4.42638	3.38019
AT1G15890	2.96037	2.1765
AT1G15900	0.795391	0.941461
AT1G15910	3.78144	3.03695
AT1G15920	3.67036	3.66602
AT1G15930	7.44182	6.40354
AT1G15940	3.43654	3.61219
AT1G15950	6.17864	7.51415
AT1G05213	4.89401	6.23455
AT1G15960	3.79135	3.49434
AT1G15970	3.80235	4.02667
AT1G15980	8.1026	7.97364
AT1G15990	3.80163	3.50368
AT1G16000	5.64066	4.74711
AT1G16010	5.00304	5.99048
AT1G16020	3.99115	3.87746
AT1G16022	1.15908	1.27756
AT1G16025	0.678398	1.43273
AT1G16030	2.17323	4.31105
AT1G16040	3.33619	2.56955
AT1G16060	2.25421	1.70123
AT1G16070	1.91029	1.36882
AT1G16080	7.58451	7.46978
AT1G16090	1.70318	4.38297
AT1G16100	0	0
AT1G16110	4.00143	4.34454
AT1G05217	0	0
AT1G16120	0.0309696	0.250031
AT1G16130	1.46763	3.48471
AT1G16150	0.090983	0.138838
AT1G16160	0	0.182654
AT1G16170	4.92654	3.80605
AT1G16180	6.77912	7.03723
AT1G16190	4.42677	4.59657
AT1G16210	6.18084	6.05344
AT1G16220	1.33537	1.88804
AT1G16225	0	0
AT1G05223	0	0
AT1G16230	0	0
AT1G16240	5.65436	6.53825
AT1G16250	3.3062	2.5891
AT1G16260	4.92182	5.16341
AT1G16270	3.63989	4.00032
AT1G16280	3.64848	3.02578
AT1G16290	0.0469912	0
AT1G16300	1.98342	2.12474
AT1G16310	1.83954	0.89074
AT1G16320	6.57034	6.01231
AT1G16330	0.719504	0.755794
AT1G16340	4.46396	3.4525
AT1G16350	5.73124	4.40706
AT1G16360	0.105741	0.174705
AT1G16370	0.272393	6.93483
AT1G16380	0	1.10863
AT1G16390	1.46944	0.275737
AT1G16400	1.83573	1.41674
AT1G16410	6.91937	4.51265
AT1G16420	0.148305	3.75914
AT1G16430	3.41421	2.91258
AT1G16440	0.263176	0.0618399
AT1G16445	3.22084	2.39346
AT1G16450	0	0
AT1G16460	6.24811	5.91965
AT1G16470	6.06183	5.6184
AT1G16480	1.52086	1.95377
AT1G05227	1.10643	1.76742
AT1G16489	1.50429	1.576
AT1G16490	2.11275	1.80167
AT1G16500	3.20272	5.5312
AT1G05233	0	0
AT1G16510	2.83467	2.95538
AT1G05237	0	0
AT1G16515	1.35605	0.802291
AT1G16520	3.58917	3.63437
AT1G16530	1.09666	1.65876
AT1G16540	2.85677	3.3066
AT1G16560	5.73337	5.69035
AT1G05243	4.80437	4.80124
AT1G16570	4.28252	4.20786
AT1G16590	2.77668	2.17701
AT1G16610	5.12135	4.80383
AT1G16630	1.31963	0.956005
AT1G16635	0	0.194512
AT1G05247	0	0
AT1G16640	1.79862	1.71221
AT1G16650	3.11988	2.04479
AT1G16670	4.03316	5.25048
AT1G16680	3.90622	2.97148
AT1G16690	3.18833	2.63993
[truncated: 30,551 more rows]
